# Supplementary material for: Upregulation of Apolipoprotein L6 Improves Tumor Immunotherapy by Inducing Immunogenic Cell Death
Source: MDPI journal article supplement (doi:10.3390/biom13030415), 2023-02-22
Supplement: s1 [file s1]

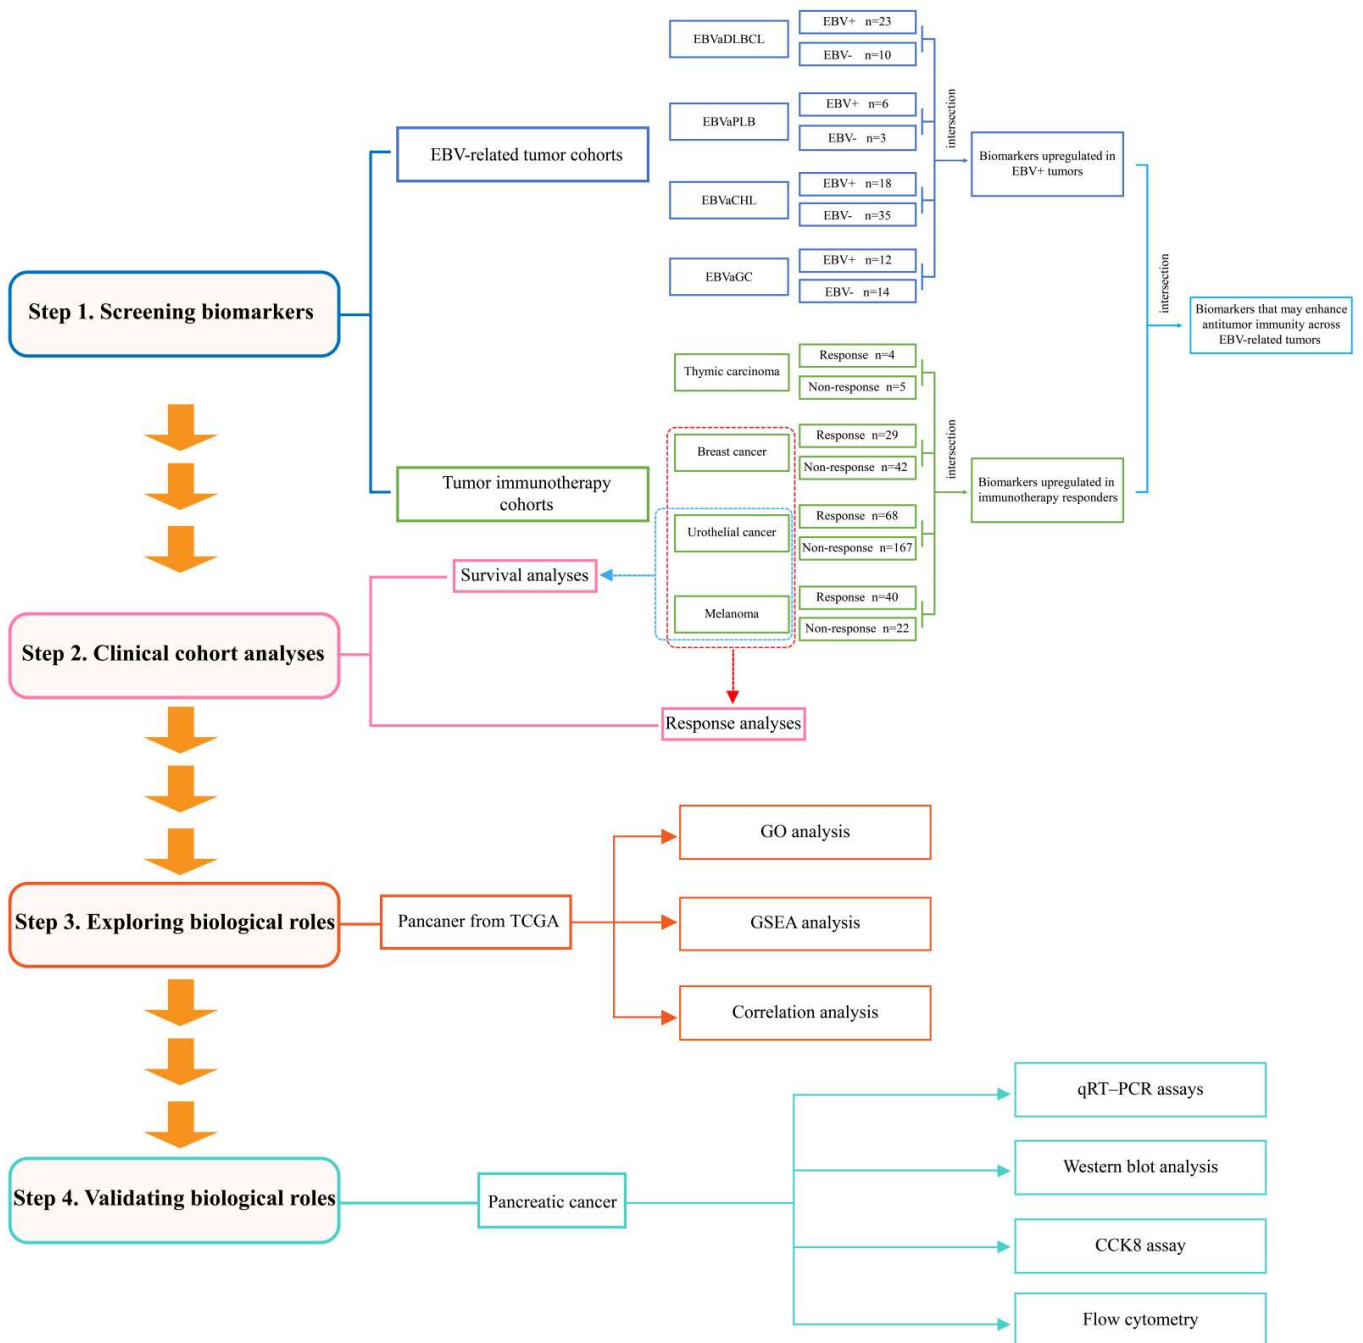

**Figure S1. Study flowchart.** **Step 1** Screening the critical biomarkers enhancing antitumor immunity across EBV-positive tumors. **Step 2** Assessing the clinical values of APOL6 in pan-cancer based on immunotherapy cohorts. **Step 3** Exploring the biological roles of APOL6 in pan-cancer by bioinformatics analysis based on the TCGA database. **Step 4** Validating the biological roles of APOL6 in pancreatic cancer in vitro.

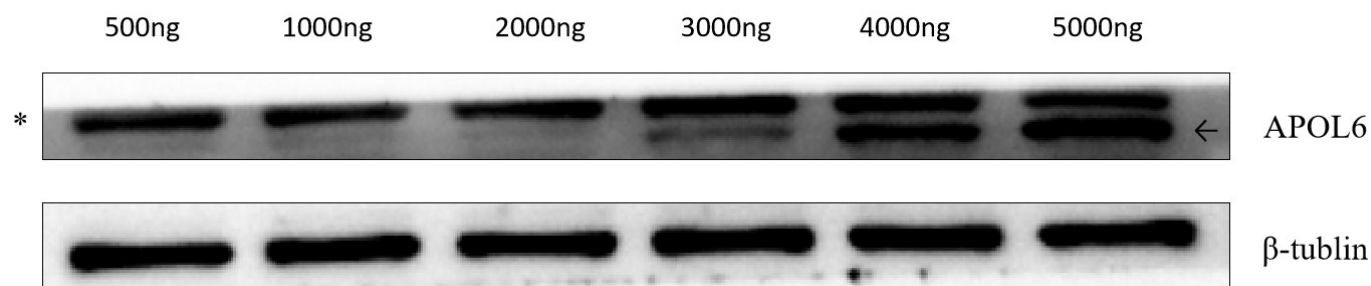

**Figure S2. Immunoblot analysis of APOL6 protein amount in MIA PaCa-2 cells transfected with FLAG-tagged APOL6 expression plasmids at different doses.** FLAG-tagged APOL6 expression plasmids were transfected at the indicated doses in 6-well plates. The plasmid doses for transfection increased within a particular range (i.e. greater than or equal to 2000 ng), along with increased expression of APOL6. According to the manufacturer's instructions, the APOL6 plasmid doses for transfection in 96-well plates were set at 100 ng, 150 ng, 200 ng, and 250 ng. The non-specific bands are marked with asterisk (\*).

**Table S1.** Univariate and multivariate analyses of factors associated with response to immunotherapy in the urothelial cancer cohort.

|                                      | Statistics  | Crude analysis    |                             | Adjust analysis   |                             |
|--------------------------------------|-------------|-------------------|-----------------------------|-------------------|-----------------------------|
|                                      |             | OR (95%CI)        | <i>P</i> value <sup>a</sup> | OR (95%CI)        | <i>P</i> value <sup>a</sup> |
| <b>APOL6 expression<sup>b</sup></b>  |             |                   |                             |                   |                             |
| Low                                  | 153 (65.1%) | 1                 |                             |                   |                             |
| High                                 | 82 (34.9%)  | 2.96 (1.65, 5.31) | <0.01                       | 2.08 (0.97, 4.46) | 0.06 <sup>c</sup>           |
| <b>Received platinum</b>             |             |                   |                             |                   |                             |
| Yes                                  | 185 (78.7%) | 1                 |                             |                   |                             |
| No                                   | 50 (21.3%)  | 1.70 (0.88, 3.28) | 0.11                        |                   |                             |
| <b>Sample collected pre-platinum</b> |             |                   |                             |                   |                             |
| Yes                                  | 107 (59.4%) | 1                 |                             |                   |                             |
| No                                   | 73 (40.6%)  | 0.69 (0.34, 1.38) | 0.29                        |                   |                             |
| <b>Lund2</b>                         |             |                   |                             |                   |                             |
| Basal/SCC-like                       | 48 (20.4%)  | 1                 |                             |                   |                             |
| Genomically unstable                 | 44 (18.7%)  | 3.95 (1.63, 9.56) | <0.01                       |                   |                             |
| Infiltrated                          | 58 (24.7%)  | 0.78 (0.31, 1.95) | 0.60                        |                   |                             |
| UroA                                 | 73 (31.1%)  | 0.84 (0.36, 1.98) | 0.69                        |                   |                             |
| UroB                                 | 12 (5.1%)   | 1.00 (0.23, 4.31) | 1                           |                   |                             |
| <b>TCGA Subtype</b>                  |             |                   |                             |                   |                             |
| I                                    | 84 (35.7%)  | 1                 |                             |                   |                             |
| II                                   | 59 (25.1%)  | 1.47 (0.72, 3.00) | 0.30                        |                   |                             |
| III                                  | 48 (20.4%)  | 0.70 (0.30, 1.63) | 0.40                        |                   |                             |
| IV                                   | 44 (18.7%)  | 1.24 (0.56, 2.74) | 0.60                        |                   |                             |
| <b>Intravesical BCG</b>              |             |                   |                             |                   |                             |
| No                                   | 185 (78.7%) | 1                 |                             |                   |                             |
| Yes                                  | 50 (21.3%)  | 1.07 (0.54, 2.11) | 0.85                        |                   |                             |
| <b>Sex</b>                           |             |                   |                             |                   |                             |
| Male                                 | 186 (79.1%) | 1                 |                             |                   |                             |
| Female                               | 49 (20.9%)  | 0.66 (0.31, 1.37) | 0.26                        |                   |                             |
| <b>Race</b>                          |             |                   |                             |                   |                             |
| White                                | 213 (92.2%) | 1                 |                             |                   |                             |
| Other                                | 18 (7.8%)   | 0.96 (0.33, 2.80) | 0.94                        |                   |                             |
| <b>Baseline ECOG Score</b>           |             |                   |                             |                   |                             |
| 0                                    | 94 (40.0%)  | 1                 |                             |                   |                             |
| 1                                    | 131 (55.7%) | 0.40 (0.22, 0.72) | <0.01                       |                   |                             |
| 2                                    | 10 (4.3%)   | 1.03 (0.27, 3.89) | 0.97                        |                   |                             |
| <b>Tobacco Use History</b>           |             |                   |                             |                   |                             |
| Never                                | 78 (33.2%)  | 1                 |                             |                   |                             |
| Previous                             | 132 (56.2%) | 1.45 (0.78, 2.71) | 0.24                        |                   |                             |
| Current                              | 25 (10.6%)  | 0.55 (0.17, 1.80) | 0.36                        |                   |                             |
| <b>Tissue</b>                        |             |                   |                             |                   |                             |
| Bladder                              | 133 (58.1%) | 1                 |                             |                   |                             |

|                          |             |                    |       |
|--------------------------|-------------|--------------------|-------|
| Kidney                   | 46 (20.1%)  | 0.53 (0.23, 1.19)  | 0.12  |
| Ureter                   | 32 (14.0%)  | 0.83 (0.28, 2.49)  | 0.74  |
| Others                   | 18 (7.9%)   | 1.13 (0.50, 2.57)  | 0.76  |
| <b>Sample age</b>        |             |                    |       |
| More than 2 years        | 51 (21.7%)  | 1                  |       |
| 1-2 years                | 61 (26.0%)  | 1.65 (0.73, 3.74)  | 0.23  |
| Less than 1 year         | 123 (52.3%) | 1.07 (0.51, 2.26)  | 0.86  |
| <b>Metastasis Status</b> |             |                    |       |
| Liver                    | 68 (32.1%)  | 1                  |       |
| Visceral                 | 105 (49.5%) | 2.34 (0.99, 5.56)  | 0.05  |
| Lymph node only          | 39 (18.4%)  | 7.12 (2.70, 18.77) | <0.01 |

<sup>a</sup> *P* values are derived from univariate and multivariate logistic regression models; <sup>b</sup> APOL6 expression: Low and high, respectively, indicate lower than or higher than the mean expression level of APOL6 among the whole urothelial cancer cohort; <sup>c</sup> Adjusted for lund2, baseline ECOG score and metastasis status.

**Table S2.** Univariate and multivariate analyses of factors associated with overall survival in the urothelial cancer cohort receiving immunotherapy.

|                                      | Statistics  | Crude analysis    |                             | Adjust analysis   |                             |  |
|--------------------------------------|-------------|-------------------|-----------------------------|-------------------|-----------------------------|--|
|                                      |             | HR (95%CI)        | <i>P</i> value <sup>a</sup> | HR (95%CI)        | <i>P</i> value <sup>a</sup> |  |
| <b>APOL6 expression<sup>b</sup></b>  |             |                   |                             |                   |                             |  |
| Low                                  | 218 (62.6%) | 1                 |                             | 1                 |                             |  |
| High                                 | 130 (37.4%) | 0.57 (0.43, 0.75) | <0.01                       | 0.58 (0.42, 0.80) | <0.01 <sup>c</sup>          |  |
| <b>Received platinum</b>             |             |                   |                             |                   |                             |  |
| Yes                                  | 272 (78.2%) | 1                 |                             |                   |                             |  |
| No                                   | 76 (21.8%)  | 0.71 (0.51, 0.99) | 0.05                        |                   |                             |  |
| <b>Sample collected pre-platinum</b> |             |                   |                             |                   |                             |  |
| Yes                                  | 161 (60.5%) | 1                 |                             |                   |                             |  |
| No                                   | 105 (39.5%) | 1.32 (0.99, 1.76) | 0.06                        |                   |                             |  |
| <b>Lund 2</b>                        |             |                   |                             |                   |                             |  |
| Basal/SCC-like                       | 66 (19.0%)  | 1                 |                             |                   |                             |  |
| Genomically unstable                 | 70 (20.1%)  | 0.51 (0.33, 0.79) | <0.01                       |                   |                             |  |
| Infiltrated                          | 92 (26.4%)  | 0.80 (0.55, 1.15) | 0.23                        |                   |                             |  |
| UroA                                 | 102 (29.3%) | 0.89 (0.62, 1.28) | 0.52                        |                   |                             |  |
| UroB                                 | 18 (5.2%)   | 1.00 (0.54, 1.84) | 0.99                        |                   |                             |  |
| <b>TCGA Subtype</b>                  |             |                   |                             |                   |                             |  |
| I                                    | 118 (33.9%) | 1                 |                             |                   |                             |  |
| II                                   | 95 (27.3%)  | 0.96 (0.69, 1.35) | 0.83                        |                   |                             |  |
| III                                  | 69 (19.8%)  | 1.23 (0.86, 1.75) | 0.26                        |                   |                             |  |
| IV                                   | 66 (19.0%)  | 0.98 (0.68, 1.42) | 0.92                        |                   |                             |  |
| <b>Intravesical BCG</b>              |             |                   |                             |                   |                             |  |
| No                                   | 265 (76.2%) | 1                 |                             |                   |                             |  |
| Yes                                  | 83 (23.8%)  | 0.98 (0.73, 1.32) | 0.89                        |                   |                             |  |
| <b>Sex</b>                           |             |                   |                             |                   |                             |  |
| Male                                 | 272 (78.2%) | 1                 |                             |                   |                             |  |
| Female                               | 76 (21.8%)  | 1.23 (0.91, 1.66) | 0.18                        |                   |                             |  |
| <b>Race</b>                          |             |                   |                             |                   |                             |  |
| White                                | 318 (92.4%) | 1                 |                             |                   |                             |  |
| Other                                | 26 (7.6%)   | 0.69 (0.40, 1.18) | 0.17                        |                   |                             |  |
| <b>Baseline ECOG Score</b>           |             |                   |                             |                   |                             |  |
| 0                                    | 134 (38.5%) | 1                 |                             |                   |                             |  |
| 1                                    | 196 (56.3%) | 2.10 (1.58, 2.79) | <0.01                       |                   |                             |  |
| 2                                    | 18 (5.2%)   | 1.97 (1.04, 3.72) | 0.04                        |                   |                             |  |
| <b>Tobacco Use History</b>           |             |                   |                             |                   |                             |  |
| Never                                | 116 (33.3%) | 1                 |                             |                   |                             |  |
| Previous                             | 197 (56.6%) | 0.90 (0.68, 1.19) | 0.44                        |                   |                             |  |
| Current                              | 35 (10.1%)  | 1.02 (0.65, 1.61) | 0.92                        |                   |                             |  |
| <b>Tissue</b>                        |             |                   |                             |                   |                             |  |

|                          |             |                   |       |
|--------------------------|-------------|-------------------|-------|
| Bladder                  | 195 (57.4%) | 1                 |       |
| Kidney                   | 67 (19.7%)  | 1.18 (0.85, 1.65) | 0.32  |
| Ureter                   | 26 (7.7%)   | 0.97 (0.59, 1.59) | 0.90  |
| Others                   | 52 (15.3%)  | 0.95 (0.64, 1.40) | 0.79  |
| <b>Sample age</b>        |             |                   |       |
| More than 2 years        | 73 (21.0%)  | 1                 |       |
| 1-2 years                | 99 (28.4%)  | 0.78 (0.54, 1.13) | 0.19  |
| Less than 1 year         | 176 (50.6%) | 1.09 (0.78, 1.51) | 0.62  |
| <b>Metastasis Status</b> |             |                   |       |
| Liver                    | 98 (31.0%)  | 1                 |       |
| Visceral                 | 158 (50.0%) | 0.61 (0.45, 0.81) | <0.01 |
| Lymph node only          | 60 (19.0%)  | 0.35 (0.23, 0.53) | <0.01 |

<sup>a</sup> *P* values are derived from univariate and multivariate cox proportional hazards regression model; <sup>b</sup> APOL6 expression: Low and High, respectively, indicate lower than or higher than the mean expression level of APOL6 among the whole urothelial cancer cohort; <sup>c</sup>Adjusted for received platinum, lund2, baseline ECOG score and metastasis status.
