# Supplementary material for: Upregulation of Apolipoprotein L6 Improves Tumor Immunotherapy by Inducing Immunogenic Cell Death
Source: Biomolecules. 2023 Feb 22;13(3):415. doi: 10.3390/biom13030415 (PMC10046184; doi:10.3390/biom13030415)
Supplement: Supplementary file 1 [file biomolecules-13-00415-s001.zip › Supplementary Materials, Tables S3–S9.xlsx]

## Sheet: Table S3
Table S3.Sequences of qRT-PCR primers used in the present study.
Genes	Forward Primer	Reverse Primer
GAPDH	GGAGCGAGATCCCTCCAAAAT	GGCTGTTGTCATACTTCTCATGG
IFN-α	GCCTCGCCCTTTGCTTTACT	CTGTGGGTCTCAGGGAGATCA
IFN-β	ATGACCAACAAGTGTCTCCTCC	GGAATCCAAGCAAGTTGTAGCTC
CXCL10	GTGGCATTCAAGGAGTACCTC	TGATGGCCTTCGATTCTGGATT

## Sheet: Table S4
Table S4. GO analysis of significantly differentially expressed genes in melanoma.
ID	Description	GeneRatio	Count	ONT	BgRatio	pvalue	p.adjust	geneID
GO:0006955	immune response	736/2341	736	BP	2148/17910	7.19437e-166	6.15046e-162	GBP1/STAT1/PARP14/XAF1/PDCD1LG2/THEMIS/IDO1/CD274/GBP5/GBP4/UBD/DDX60/IFIH1/TRIM22/SH2D1A/DTX3L/APOL1/IRF1/PARP9/GCH1/IFNG/PTPN22/CRTAM/SAMSN1/TRAT1/IFIT3/B2M/IFIT2/GPR65/PTPRC/BTN3A1/RSAD2/TNIP3/BIRC3/PYHIN1/KLRD1/FCGR3A/TAP1/BTN3A3/ICOS/CD80/FYB1/GBP2/CYBB/FASLG/CYLD/MNDA/NMI/NLRC5/CLEC7A/PTGER4/LILRB1/DDX58/TLR8/CLNK/CTSS/CD3G/SAMHD1/FCGR1B/CD86/TRGC2/CD38/ZBP1/TNFSF10/CYSLTR1/CCL5/LAX1/CD8A/T…
GO:0002250	adaptive immune response	326/2341	326	BP	563/17910	1.82096e-145	7.78367e-142	PDCD1LG2/THEMIS/CD274/SH2D1A/IRF1/SAMSN1/TRAT1/B2M/PTPRC/BTN3A1/RSAD2/TAP1/BTN3A3/CD80/LILRB1/TLR8/CTSS/CD3G/FCGR1B/CD86/TRGC2/LAX1/CCR2/CXCL13/ITK/ERAP1/CD84/SLAMF1/IL18RAP/JAK2/TRGC1/TBX21/CD226/PIK3CG/LYN/PRF1/BTN3A2/TRAV14DV4/CD48/HAVCR2/LILRB2/CD28/HLA-F/IGKV2-29/CD8B/LAG3/SLA2/SLAMF6/IL27/TLR4/IGKV4-1/TNFSF13B/TRAV4/IL12RB1/HLA-E/TRAV5/EBI3/IL7R/TRAV34/BTLA/TRAV2/TRAV21/TAP2/TRAV22/CLEC6A/P…
GO:0002376	immune system process	871/2341	871	BP	3063/17910	6.66172e-142	1.89837e-138	GBP1/STAT1/CXCL10/CXCL11/PARP14/XAF1/PDCD1LG2/THEMIS/IDO1/CD274/GBP5/GBP4/IFI44L/UBD/DDX60/IFIH1/TRIM22/SH2D1A/DTX3L/APOL1/IRF1/PARP9/CXCL9/GCH1/IFNG/PTPN22/GPR171/CRTAM/SAMSN1/TRAT1/IFIT3/B2M/IFIT2/GPR65/PTPRC/BTN3A1/RSAD2/GBP3/TNIP3/BIRC3/PYHIN1/KLRD1/CCL8/FCGR3A/TAP1/BTN3A3/ICOS/CD80/TIGIT/FYB1/GBP2/CYBB/FASLG/CYLD/MNDA/CCR5/NMI/NLRC5/CLEC7A/PTGER4/LILRB1/DDX58/TLR8/CLNK/CLECL1/CTSS/CD3G/SAMHD…
GO:0050776	regulation of immune response	374/2341	374	BP	1033/17910	9.07327e-86	1.93918e-82	GBP1/STAT1/PARP14/THEMIS/IDO1/CD274/GBP5/DDX60/IFIH1/SH2D1A/IRF1/PARP9/IFNG/PTPN22/CRTAM/SAMSN1/TRAT1/B2M/PTPRC/BTN3A1/RSAD2/TNIP3/BIRC3/PYHIN1/KLRD1/FCGR3A/CD80/FYB1/CYLD/MNDA/NMI/NLRC5/CLEC7A/LILRB1/DDX58/TLR8/CTSS/CD3G/SAMHD1/FCGR1B/CD86/CD38/CCL5/LAX1/CD8A/TLR7/ACOD1/NLRC3/CCR2/CXCL13/ITK/RASGRP1/ERAP1/FCRL3/CD84/HLA-B/IL2RA/IL18RAP/TLR3/JAK2/TBX21/KLRC1/CD226/CR1L/PIK3AP1/CD96/PSMB9/LYN/HLA-…
GO:0002682	regulation of immune system process	483/2341	483	BP	1570/17910	1.07896e-83	1.84481e-80	GBP1/STAT1/CXCL10/PARP14/PDCD1LG2/THEMIS/IDO1/CD274/GBP5/DDX60/IFIH1/SH2D1A/DTX3L/IRF1/PARP9/IFNG/PTPN22/GPR171/CRTAM/SAMSN1/TRAT1/B2M/PTPRC/BTN3A1/RSAD2/TNIP3/BIRC3/PYHIN1/KLRD1/CCL8/FCGR3A/ICOS/CD80/TIGIT/FYB1/CYLD/MNDA/NMI/NLRC5/CLEC7A/PTGER4/LILRB1/DDX58/TLR8/CLECL1/CTSS/CD3G/SAMHD1/FCGR1B/CD86/CD38/CCL5/LAX1/CD8A/TLR7/ACOD1/CCL4/NLRC3/CCR2/CXCL13/ITK/RASGRP1/ERAP1/FCRL3/CD84/HLA-B/CD2/IL2RA/…
GO:0002684	positive regulation of immune system process	376/2341	376	BP	1087/17910	1.14581e-79	1.63259e-76	GBP1/STAT1/CXCL10/PDCD1LG2/THEMIS/IDO1/CD274/GBP5/DDX60/IFIH1/SH2D1A/IRF1/PARP9/IFNG/PTPN22/CRTAM/TRAT1/B2M/PTPRC/BTN3A1/RSAD2/TNIP3/BIRC3/PYHIN1/CCL8/FCGR3A/ICOS/CD80/FYB1/CYLD/MNDA/NLRC5/CLEC7A/LILRB1/DDX58/TLR8/CLECL1/CTSS/CD3G/CD86/CD38/CCL5/LAX1/TLR7/ACOD1/CCL4/CCR2/CXCL13/ITK/RASGRP1/FCRL3/CD84/CD2/IL2RA/IL18RAP/TLR3/TBX21/P2RY12/CD226/CR1L/PIK3AP1/PSMB9/LYN/HLA-DRA/EVI2B/TLR10/HAVCR2/NLRC4…
GO:0006952	defense response	495/2341	495	BP	1681/17910	1.46872e-78	1.79373e-75	GBP1/STAT1/CXCL10/PARP14/XAF1/IDO1/GBP5/GBP4/IFI44L/UBD/DDX60/IFIH1/TRIM22/SH2D1A/DTX3L/APOL1/IRF1/PARP9/CXCL9/GCH1/IFNG/PTPN22/CRTAM/TRAT1/IFIT3/B2M/IFIT2/PTPRC/APOL3/RSAD2/GBP3/TNIP3/BIRC3/ABCD2/PYHIN1/KLRD1/TAP1/GBP2/CYBB/CYLD/MNDA/CCR5/NMI/NLRC5/CLEC7A/PTGER4/LILRB1/DDX58/TLR8/CTSS/SAMHD1/FCGR1B/ZBP1/CYSLTR1/CCL5/TLR7/CIITA/ACOD1/NLRC3/CCR2/CXCL13/ITK/LY75/RASGRP1/ERAP1/IFIT5/FCRL3/CD84/SLAMF…
GO:0003823	antigen binding	112/2173	112	MF	150/16967	3.45975e-68	5.02701e-65	KLRD1/TAP1/SLAMF1/HLA-B/HLA-DRA/TRGV9/CD48/HLA-F/HLA-C/IGKV2-29/LAG3/IGKV4-1/HLA-E/IL7R/HLA-DPA1/IGLV3-19/JCHAIN/IGHV3-23/IGKV1-27/HLA-DRB1/TRAV19/IGLV4-69/IGLV2-11/IGKV1D-17/IGKV1-16/CD1D/IGKV1D-8/IGHV3-13/HLA-DPB1/IGKV2-30/IGHV4-39/IGLV9-49/IGHV3-30/IGKV2-28/IGHV3-11/IGHG1/HLA-DQA1/IGLV2-14/IGHV4-59/IGKV1-17/IGHV3-33/LILRA1/IGKC/TRAV29DV5/IGLV3-10/IGKV5-2/IGLV1-51/IGKV2-24/IGKV1-39/LILRB4/IGKV2…
GO:0050778	positive regulation of immune response	289/2341	289	BP	809/17910	5.71615e-64	6.10842e-61	GBP1/THEMIS/IDO1/CD274/GBP5/DDX60/IFIH1/SH2D1A/IRF1/PARP9/IFNG/PTPN22/CRTAM/TRAT1/B2M/PTPRC/BTN3A1/RSAD2/TNIP3/BIRC3/PYHIN1/FCGR3A/CD80/FYB1/CYLD/MNDA/NLRC5/CLEC7A/LILRB1/DDX58/TLR8/CTSS/CD3G/CD86/CD38/CCL5/LAX1/TLR7/ACOD1/CCR2/ITK/RASGRP1/FCRL3/IL18RAP/TLR3/TBX21/CD226/CR1L/PIK3AP1/PSMB9/LYN/HLA-DRA/TLR10/HAVCR2/NLRC4/CD28/FCGR1A/HLA-F/FPR2/IGKV2-29/CFB/LAG3/SLA2/SLAMF6/TLR4/IGKV4-1/TNFSF13B/NCK…
GO:0002252	immune effector process	369/2341	369	BP	1197/17910	8.56183e-63	8.13279e-60	GBP1/STAT1/CXCL10/IFI44L/DDX60/IFIH1/TRIM22/SH2D1A/DTX3L/IRF1/PARP9/CXCL9/IFNG/CRTAM/B2M/PTPRC/RSAD2/GBP3/BIRC3/KLRD1/FCGR3A/BTN3A3/CD80/CYBB/MNDA/NLRC5/PTGER4/LILRB1/DDX58/TLR8/CTSS/CD3G/SAMHD1/CD86/TLR7/CCR2/RASGRP1/LRMP/IFIT5/FCRL3/CD84/SLAMF1/IL2RA/IL18RAP/TLR3/ATP8B4/APOBEC3G/TBX21/OAS2/CD226/SLPI/CR1L/PIK3CG/CD96/LYN/IFIT1/PRF1/BIN2/BTN3A2/HAVCR2/OAS1/LILRB2/CD28/FCGR1A/LYZ/HLA-F/FPR2/FLG2/…
GO:0044459	plasma membrane part	556/2436	556	CC	2283/18675	1.7273e-56	1.58221e-53	CXCL10/AKAP5/CXCL9/PTPN22/TRAT1/B2M/PTPRC/KLRD1/FCGR3A/ICOS/TNFRSF9/CYBB/FASLG/CYLD/CD69/CCR5/LILRB1/DDX58/TLR8/GRIN3A/CD3G/SAMHD1/TRGC2/CD38/CDC42SE2/TNFSF10/PLEK/CD8A/CCR2/LY75/LRMP/IFIT5/CD72/CD84/HLA-B/CCR8/CD2/IL2RA/HLA-DOA/IL18RAP/GZMA/IGSF6/TLR3/JAK2/MSR1/FCRL6/SLC8A1/KLRC1/P2RY12/CD226/CD96/LYN/HLA-DRA/BIN2/NAIP/EVI2B/TNFSF8/PROM2/CXCR6/TRGV9/CD48/EFNA3/HAVCR2/CSF2RB/NSMF/LILRB2/CD28/AIF1…
GO:0045321	leukocyte activation	354/2341	354	BP	1186/17910	3.06193e-56	2.61764e-53	PDCD1LG2/THEMIS/IDO1/CD274/UBD/IRF1/IFNG/PTPN22/SAMSN1/B2M/PTPRC/BTN3A1/RSAD2/ICOS/CD80/TIGIT/CYBB/CYLD/MNDA/CLEC7A/PTGER4/LILRB1/TLR8/CLECL1/CTSS/CD3G/CD86/CD38/CCL5/LAX1/CD8A/TLR7/NLRC3/CCR2/ITK/RASGRP1/LRMP/FCRL3/CD84/SLAMF1/CD2/IL2RA/HLA-DOA/IL18RAP/IKZF3/TLR3/BATF2/ATP8B4/TBX21/CD226/SLPI/PIK3CG/LYN/PRF1/BIN2/TNFSF8/HAVCR2/LILRB2/CD28/AIF1/LYZ/HLA-F/FPR2/FLG2/CD8B/VCAM1/LAG3/RHOH/SLA2/DOCK2/…
GO:0002697	regulation of immune effector process	188/2341	188	BP	441/17910	8.73755e-55	6.79066e-52	STAT1/DDX60/SH2D1A/DTX3L/PARP9/IFNG/CRTAM/B2M/PTPRC/RSAD2/BIRC3/CD80/LILRB1/DDX58/CD86/CCR2/RASGRP1/FCRL3/CD84/IL2RA/IL18RAP/TLR3/APOBEC3G/TBX21/CD226/CR1L/CD96/LYN/IFIT1/HAVCR2/CD28/HLA-F/IGKV2-29/CFB/LAG3/SLAMF6/IL27/TLR4/IGKV4-1/HLA-DMB/IL12RB1/HLA-E/IL7R/IL15/IGLV3-19/BTK/IGHV3-23/RPS19/IL12B/IGLV2-11/IGKV1-16/CD244/KIR2DL4/ZNF683/KLK5/IGHV3-13/IGKV2-30/IGHV4-39/FGL2/VAV1/IGHV3-30/IGKV2-28/IG…
GO:0002449	lymphocyte mediated immunity	148/2341	148	BP	293/17910	1.02107e-54	7.27427e-52	SH2D1A/CRTAM/B2M/PTPRC/RSAD2/KLRD1/BTN3A3/LILRB1/TLR8/CCR2/RASGRP1/IL18RAP/TBX21/CD226/CD96/PRF1/BTN3A2/HAVCR2/CD28/HLA-F/IGKV2-29/LAG3/SLA2/SLAMF6/IGKV4-1/IL12RB1/HLA-E/IL7R/IGLV3-19/BTK/IGHV3-23/GZMB/CD27/IL12B/IGLV2-11/IGKV1-16/KIR2DL4/IGHV3-13/IGKV2-30/IGHV4-39/FGL2/VAV1/IGHV3-30/TSTA3/IGKV2-28/IGHV3-11/IGHG1/CD160/IGLV2-14/IGHV4-59/IGKV1-17/XCL1/IGHV3-33/C1S/IGKC/C2/TNF/C1QC/CR1/IGKV5-2/IGLV…
GO:0001775	cell activation	380/2341	380	BP	1342/17910	4.1566e-54	2.73344e-51	CXCL10/PDCD1LG2/THEMIS/IDO1/CD274/UBD/IRF1/IFNG/PTPN22/SAMSN1/B2M/PTPRC/BTN3A1/RSAD2/ICOS/CD80/TIGIT/CYBB/CYLD/MNDA/CLEC7A/PTGER4/LILRB1/TLR8/CLECL1/CTSS/CD3G/CD86/CD38/CCL5/PLEK/LAX1/CD8A/TLR7/NLRC3/CCR2/ITK/RASGRP1/LRMP/FCRL3/CD84/SLAMF1/CD2/IL2RA/HLA-DOA/IL18RAP/IKZF3/TLR3/BATF2/JAK2/ATP8B4/TBX21/P2RY12/CD226/SLPI/PIK3CG/LYN/PRF1/BIN2/TNFSF8/HAVCR2/LILRB2/CD28/AIF1/LYZ/HLA-F/FPR2/FLG2/CD8B/VCA…
GO:0002443	leukocyte mediated immunity	271/2341	271	BP	814/17910	8.79394e-53	5.36996e-50	SH2D1A/CRTAM/B2M/PTPRC/RSAD2/KLRD1/BTN3A3/CYBB/MNDA/LILRB1/DDX58/TLR8/CTSS/CCR2/RASGRP1/LRMP/CD84/IL18RAP/TLR3/ATP8B4/TBX21/CD226/SLPI/PIK3CG/CD96/LYN/PRF1/BIN2/BTN3A2/HAVCR2/LILRB2/CD28/LYZ/HLA-F/FPR2/FLG2/IGKV2-29/LAG3/SLA2/DOCK2/SLAMF6/CD53/TLR4/IGKV4-1/NCKAP1L/IL12RB1/HLA-E/IL7R/ARHGAP9/IGLV3-19/BTK/IGHV3-23/EEF2/KRT1/TLR2/PKP1/GZMB/CD27/CLEC12A/IL12B/IGLV2-11/IGKV1-16/RAB3A/VNN1/KIR2DL4/IMPD…
GO:0006959	humoral immune response	139/2341	139	BP	276/17910	3.22418e-51	1.83757e-48	SH2D1A/PTPRC/ACOD1/CCR2/CXCL13/SLPI/CR1L/CD28/LYZ/PI3/IGKV2-29/CFB/IGKV4-1/IL7/HLA-E/EBI3/PDCD1/IGLV3-19/JCHAIN/IGHV3-23/KRT1/RPS19/IGLV2-11/IGKV1-16/KLK5/IGHV3-13/IGKV2-30/GPR183/IGHV4-39/IGHV3-30/IGKV2-28/IGHV3-11/IGHG1/S100A7/IGLV2-14/IGHV4-59/IGKV1-17/C3AR1/IGHV3-33/C1S/KRT6A/GPI/IGKC/C2/TNF/C1QC/CR1/IGKV5-2/S100A8/SPINK5/IGLV1-51/IGKV1-39/S100A9/MS4A1/IGHV1-69/CD5L/IGLV2-8/IGHV3-48/IGLV2-23/…
GO:0006954	inflammatory response	261/2341	261	BP	784/17910	8.79682e-51	4.70025e-48	IDO1/GBP5/IFNG/PTPRC/APOL3/TNIP3/BIRC3/ABCD2/CYBB/CYLD/NMI/CLEC7A/PTGER4/TLR8/CYSLTR1/CCL5/TLR7/ACOD1/NLRC3/CCR2/CXCL13/LY75/RASGRP1/IL2RA/IL18RAP/TLR3/JAK2/CR1L/PIK3CG/PIK3AP1/CD96/LYN/APOL2/NAIP/CXCR6/TLR10/HAVCR2/NLRC4/CD28/AIF1/LYZ/CD200R1/FPR2/IGKV2-29/VCAM1/CFB/IL27/TLR4/IGKV4-1/HLA-E/IL15/PLA2G2D/IGLV3-19/BTK/IGHV3-23/KRT1/RPS19/TLR2/CCR4/IL12B/IGLV2-11/IGKV1-16/GAL/VNN1/KRT16/DUOXA1/STAP1…
GO:0007166	cell surface receptor signaling pathway	631/2341	631	BP	2831/17910	2.76425e-50	1.39009e-47	GBP1/STAT1/CXCL10/CXCL11/PARP14/XAF1/THEMIS/CD274/TRIM22/DTX3L/IRF1/PARP9/IFNG/PTPN22/GPR171/TRAT1/IFIT3/B2M/IFIT2/PTPRC/BTN3A1/RSAD2/BIRC3/KLRD1/FCGR3A/CD80/TNFRSF9/FYB1/GBP2/CYBB/FASLG/CYLD/MNDA/CCR5/NMI/NLRC5/P2RY10/LILRB1/GRIN3A/CD3G/SAMHD1/FCGR1B/CD86/CD38/TNFSF10/CYSLTR1/CCL5/PLEK/LAX1/CD8A/CIITA/ACOD1/SOD2/CCL4/CCR2/CXCL13/ITK/FCRL3/SLAMF1/HLA-B/CCR8/CD2/IL2RA/IL18RAP/IL15RA/IGSF6/TLR3/JAK…
GO:0046649	lymphocyte activation	226/2341	226	BP	630/17910	4.21379e-50	2.00132e-47	PDCD1LG2/THEMIS/IDO1/CD274/IRF1/IFNG/PTPN22/SAMSN1/B2M/PTPRC/BTN3A1/RSAD2/ICOS/CD80/TIGIT/CYLD/MNDA/CLEC7A/PTGER4/LILRB1/CLECL1/CD3G/CD86/CD38/CCL5/LAX1/CD8A/NLRC3/CCR2/ITK/RASGRP1/FCRL3/SLAMF1/CD2/IL2RA/HLA-DOA/IKZF3/TBX21/PIK3CG/LYN/PRF1/TNFSF8/HAVCR2/LILRB2/CD28/AIF1/HLA-F/CD8B/VCAM1/LAG3/RHOH/SLA2/DOCK2/SLAMF6/IL27/DOCK8/TLR4/IL7/TNFSF13B/NCKAP1L/GPR18/HLA-DMB/IL12RB1/HLA-E/EBI3/IL7R/HLA-DPA1…
GO:0002253	activation of immune response	229/2341	229	BP	647/17910	1.30594e-49	5.87606e-47	GBP1/THEMIS/DDX60/IFIH1/IRF1/PTPN22/TRAT1/PTPRC/BTN3A1/RSAD2/TNIP3/BIRC3/PYHIN1/FCGR3A/FYB1/CYLD/MNDA/CLEC7A/DDX58/TLR8/CTSS/CD3G/CD38/LAX1/TLR7/ACOD1/ITK/FCRL3/TLR3/CD226/CR1L/PIK3AP1/PSMB9/LYN/HLA-DRA/TLR10/HAVCR2/NLRC4/FCGR1A/IGKV2-29/CFB/SLA2/TLR4/IGKV4-1/NCKAP1L/HLA-DPA1/PSMB8/S100A14/UBA52/PIK3R2/TESPA1/CLEC6A/IGLV3-19/BTK/IGHV3-23/PSME2/KRT1/TLR2/CLEC4A/HLA-DRB1/TLR1/CD3D/TRAV19/TIFA/IGLV2…
GO:0031347	regulation of defense response	279/2341	279	BP	885/17910	5.08153e-49	2.1721e-46	STAT1/PARP14/IDO1/GBP5/DDX60/IFIH1/SH2D1A/DTX3L/IRF1/PARP9/IFNG/PTPN22/CRTAM/PTPRC/RSAD2/TNIP3/BIRC3/ABCD2/PYHIN1/CYLD/MNDA/NMI/NLRC5/CLEC7A/PTGER4/LILRB1/DDX58/TLR8/CTSS/SAMHD1/CCL5/TLR7/ACOD1/NLRC3/CCR2/RASGRP1/ERAP1/FCRL3/IL2RA/IL18RAP/TLR3/JAK2/APOBEC3G/CD226/CR1L/PIK3CG/PIK3AP1/CD96/PSMB9/LYN/IFIT1/TLR10/HAVCR2/NLRC4/CD28/HLA-F/CD200R1/FPR2/IGKV2-29/CFB/LAG3/SLAMF6/IL27/TLR4/IGKV4-1/IL12RB1/…
GO:0045087	innate immune response	280/2341	280	BP	893/17910	1.11426e-48	4.5361e-46	GBP1/STAT1/PARP14/XAF1/GBP5/GBP4/UBD/DDX60/IFIH1/TRIM22/SH2D1A/DTX3L/APOL1/IRF1/PARP9/GCH1/IFNG/PTPN22/CRTAM/IFIT3/B2M/IFIT2/RSAD2/TNIP3/BIRC3/PYHIN1/KLRD1/GBP2/CYBB/CYLD/MNDA/NMI/NLRC5/CLEC7A/LILRB1/DDX58/TLR8/CTSS/SAMHD1/FCGR1B/ZBP1/CCL5/TLR7/CIITA/ACOD1/NLRC3/RASGRP1/ERAP1/IFIT5/FCRL3/CD84/SLAMF1/HLA-B/IL18RAP/TLR3/JAK2/SP100/APOBEC3G/OAS2/CD226/SLPI/PIK3CG/PIK3AP1/CD96/PSMB9/LYN/HLA-DRA/IFIT1…
GO:0002460	adaptive immune response based on somatic recombination of immune receptors built from immunoglobulin superfamily domains	141/2341	141	BP	295/17910	2.03558e-48	7.91007e-46	CD274/B2M/PTPRC/RSAD2/BTN3A3/CD80/LILRB1/TLR8/CCR2/CXCL13/IL18RAP/TBX21/CD226/PRF1/BTN3A2/HAVCR2/CD28/HLA-F/IGKV2-29/SLA2/SLAMF6/IL27/TLR4/IGKV4-1/TNFSF13B/IL12RB1/HLA-E/EBI3/IL7R/IGLV3-19/BTK/IGHV3-23/CD27/IL12B/IGLV2-11/IGKV1-16/IGHV3-13/IGKV2-30/IGHV4-39/FGL2/KLHL6/IGHV3-30/TSTA3/IL18BP/IGKV2-28/IGHV3-11/IGHG1/IGLV2-14/IGHV4-59/IGKV1-17/XCL1/IGHV3-33/C1S/IGKC/C2/TNF/PRKCQ/C1QC/CR1/IGKV5-2/IGLV…
GO:0031226	intrinsic component of plasma membrane	344/2436	344	CC	1231/18675	2.66053e-47	1.21852e-44	TRAT1/PTPRC/ICOS/TNFRSF9/CYBB/FASLG/CD69/CCR5/GRIN3A/CD3G/TRGC2/TNFSF10/CD8A/CCR2/LY75/LRMP/CD72/CD84/CCR8/CD2/IL2RA/IL18RAP/IGSF6/TLR3/MSR1/SLC8A1/KLRC1/CD226/CD96/LYN/HLA-DRA/EVI2B/TNFSF8/PROM2/CXCR6/TRGV9/CD48/EFNA3/CSF2RB/LILRB2/CD28/NKG7/CD8B/GPR31/TLR4/NCKAP1L/BSG/IL12RB1/IL2RB/HLA-DPA1/BTLA/PHEX/TLR2/SLC12A3/CLEC2D/CLEC4A/CD27/TRAV19/ITGAD/GPR34/CCR4/SEMA4D/CCR1/COL17A1/NECTIN1/TENM2/LYPD3…
GO:0050900	leukocyte migration	183/2341	183	BP	467/17910	7.10665e-47	2.64151e-44	CXCL10/CXCL11/CCL8/CCR5/PTGER4/CCL5/CCL4/CCR2/CXCL13/CD84/CD2/TBX21/P2RY12/PIK3CG/LYN/CD48/AIF1/CD200R1/FPR2/IGKV2-29/VCAM1/DOCK8/IGKV4-1/NCKAP1L/GPR18/BSG/S100A14/PIK3R2/GCNT1/IGLV3-19/JCHAIN/IGHV3-23/RPS19/CCR1/TNFSF14/IGLV2-11/IGKV1-16/CD244/SIRPG/STAP1/IGHV3-13/IGKV2-30/GPR183/IGHV4-39/VAV1/IGHV3-30/LCK/IGKV2-28/IGHV3-11/S100A7/IGLV2-14/IGHV4-59/IGKV1-17/C3AR1/CXCR3/XCL1/IGHV3-33/CMKLR1/IGKC/…
GO:0002764	immune response-regulating signaling pathway	214/2341	214	BP	603/17910	1.51383e-46	5.3924e-44	GBP1/THEMIS/DDX60/IFIH1/IRF1/PTPN22/TRAT1/PTPRC/BTN3A1/RSAD2/TNIP3/BIRC3/FCGR3A/FYB1/CYLD/MNDA/CLEC7A/LILRB1/DDX58/TLR8/CTSS/CD3G/FCGR1B/CD38/LAX1/TLR7/ACOD1/ITK/FCRL3/TLR3/CD226/PIK3AP1/PSMB9/LYN/HLA-DRA/TLR10/HAVCR2/LILRB2/FCGR1A/CD200R1/FPR2/IGKV2-29/SLA2/TLR4/IGKV4-1/NCKAP1L/HLA-DPA1/PSMB8/S100A14/UBA52/BTLA/PIK3R2/TESPA1/CLEC6A/IGLV3-19/BTK/IGHV3-23/PSME2/TLR2/CLEC4A/HLA-DRB1/TLR1/CD3D/TRAV1…
GO:0002920	regulation of humoral immune response	89/2341	89	BP	135/17910	3.25771e-46	1.11401e-43	PTPRC/ACOD1/CXCL13/CR1L/IGKV2-29/CFB/IGKV4-1/IGLV3-19/IGHV3-23/IGLV2-11/IGKV1-16/KLK5/IGHV3-13/IGKV2-30/IGHV4-39/IGHV3-30/IGKV2-28/IGHV3-11/IGHG1/IGLV2-14/IGHV4-59/IGKV1-17/C3AR1/IGHV3-33/C1S/IGKC/C2/TNF/C1QC/CR1/IGKV5-2/SPINK5/IGLV1-51/IGKV1-39/IGHV1-69/CD5L/IGLV2-8/IGHV3-48/IGLV2-23/IGKV1D-39/IGLV1-40/IGKV3-20/C1QB/IGLV3-25/KLK7/IGKV3-15/LTA/IGKV3D-20/IGLV1-47/C1QA/VSIG4/SERPING1/IGKV1-5/PTPN6/…
GO:0048584	positive regulation of response to stimulus	534/2341	534	BP	2322/17910	9.71282e-46	3.19365e-43	GBP1/CXCL10/PARP14/THEMIS/IDO1/CD274/GBP5/UBD/DDX60/IFIH1/TRIM22/SH2D1A/DTX3L/IRF1/PARP9/IFNG/PTPN22/CRTAM/TRAT1/B2M/PTPRC/APOL3/BTN3A1/RSAD2/TNIP3/BIRC3/PYHIN1/FCGR3A/ICOS/CD80/FYB1/FASLG/CYLD/MNDA/NLRC5/CLEC7A/PTGER4/LILRB1/DDX58/TLR8/CLNK/CTSS/CD3G/CD86/CD38/CDC42SE2/TNFSF10/CCL5/PLEK/LAX1/TLR7/ACOD1/SLA/CCL4/CCR2/CXCL13/ITK/RASGRP1/IFIT5/FCRL3/SLAMF1/IL18RAP/TLR3/JAK2/TBX21/P2RY12/CD226/CR1L/…
GO:0005887	integral component of plasma membrane	325/2436	325	CC	1158/18675	5.14951e-45	1.57232e-42	TRAT1/PTPRC/ICOS/TNFRSF9/CYBB/FASLG/CD69/CCR5/GRIN3A/CD3G/TRGC2/TNFSF10/CD8A/CCR2/LY75/LRMP/CD72/CD84/CCR8/CD2/IL2RA/IL18RAP/IGSF6/TLR3/MSR1/SLC8A1/KLRC1/CD226/CD96/LYN/HLA-DRA/EVI2B/TNFSF8/PROM2/CXCR6/TRGV9/CSF2RB/LILRB2/CD28/NKG7/CD8B/GPR31/TLR4/NCKAP1L/BSG/IL12RB1/IL2RB/HLA-DPA1/BTLA/PHEX/SLC12A3/CLEC2D/CLEC4A/CD27/TRAV19/ITGAD/GPR34/CCR4/SEMA4D/CCR1/COL17A1/NECTIN1/TENM2/HLA-DQA2/CCR3/KIR2DL4…
GO:0002455	humoral immune response mediated by circulating immunoglobulin	76/2341	76	BP	104/17910	9.94843e-45	3.14997e-42	PTPRC/IGKV2-29/IGKV4-1/IGLV3-19/IGHV3-23/IGLV2-11/IGKV1-16/IGHV3-13/IGKV2-30/IGHV4-39/IGHV3-30/IGKV2-28/IGHV3-11/IGHG1/IGLV2-14/IGHV4-59/IGKV1-17/IGHV3-33/C1S/IGKC/C2/TNF/C1QC/CR1/IGKV5-2/IGLV1-51/IGKV1-39/IGHV1-69/IGLV2-8/IGHV3-48/IGLV2-23/IGKV1D-39/IGLV1-40/IGKV3-20/C1QB/IGLV3-25/HLA-DQB1/IGKV3-15/LTA/IGKV3D-20/IGLV1-47/C1QA/SERPING1/IGKV1-5/PTPN6/IGHV4-34/IGLV3-21/IGHV2-5/IGLC2/SUSD4/IGKV1-12/…
GO:0002757	immune response-activating signal transduction	202/2341	202	BP	567/17910	3.22492e-44	9.84637e-42	GBP1/THEMIS/DDX60/IFIH1/IRF1/PTPN22/TRAT1/PTPRC/BTN3A1/RSAD2/TNIP3/BIRC3/FCGR3A/FYB1/CYLD/MNDA/CLEC7A/DDX58/TLR8/CTSS/CD3G/CD38/LAX1/TLR7/ACOD1/ITK/FCRL3/TLR3/CD226/PIK3AP1/PSMB9/LYN/HLA-DRA/TLR10/HAVCR2/FCGR1A/IGKV2-29/SLA2/TLR4/IGKV4-1/NCKAP1L/HLA-DPA1/PSMB8/S100A14/UBA52/PIK3R2/TESPA1/CLEC6A/IGLV3-19/BTK/IGHV3-23/PSME2/TLR2/CLEC4A/HLA-DRB1/TLR1/CD3D/TRAV19/TIFA/IGLV2-11/PLCL2/IGKV1-16/HLA-DQA2…
GO:0048583	regulation of response to stimulus	835/2341	835	BP	4275/17910	1.28577e-43	3.79035e-41	GBP1/STAT1/CXCL10/CXCL11/PARP14/THEMIS/IDO1/AKAP5/CD274/GBP5/UBD/DDX60/IFIH1/TRIM22/SH2D1A/DTX3L/IRF1/PARP9/CXCL9/GCH1/IFNG/PTPN22/CRTAM/SAMSN1/TRAT1/B2M/PTPRC/APOL3/BTN3A1/RSAD2/TNIP3/BIRC3/ABCD2/PYHIN1/KLRD1/CCL8/FCGR3A/ICOS/CD80/FYB1/FASLG/CYLD/MNDA/NMI/NLRC5/CLEC7A/RGS18/PTGER4/LILRB1/DDX58/TLR8/GRIN3A/CLNK/CTSS/CD3G/SAMHD1/FCGR1B/CD86/CD38/CDC42SE2/TNFSF10/CCL5/PLEK/LAX1/CD8A/TLR7/ACOD1/SLA/…
GO:0042110	T cell activation	172/2341	172	BP	443/17910	1.98562e-43	5.65835e-41	PDCD1LG2/THEMIS/IDO1/CD274/IRF1/IFNG/PTPN22/B2M/PTPRC/BTN3A1/RSAD2/ICOS/CD80/TIGIT/CYLD/CLEC7A/PTGER4/LILRB1/CLECL1/CD3G/CD86/CCL5/LAX1/CD8A/NLRC3/CCR2/ITK/RASGRP1/CD2/IL2RA/HLA-DOA/TBX21/PIK3CG/LYN/TNFSF8/HAVCR2/LILRB2/CD28/AIF1/CD8B/VCAM1/LAG3/RHOH/SLA2/DOCK2/SLAMF6/IL27/DOCK8/IL7/TNFSF13B/NCKAP1L/GPR18/HLA-DMB/IL12RB1/HLA-E/EBI3/IL7R/HLA-DPA1/BTLA/IL15/TESPA1/PLA2G2D/PDCD1/CLEC4A/CD27/CD3D/TNF…
GO:0002768	immune response-regulating cell surface receptor signaling pathway	169/2341	169	BP	434/17910	7.08897e-43	1.95495e-40	GBP1/THEMIS/PTPN22/TRAT1/PTPRC/BTN3A1/FCGR3A/FYB1/CYLD/MNDA/LILRB1/CD3G/FCGR1B/CD38/LAX1/ITK/FCRL3/CD226/PSMB9/LYN/HLA-DRA/LILRB2/FCGR1A/CD200R1/FPR2/IGKV2-29/SLA2/IGKV4-1/NCKAP1L/HLA-DPA1/PSMB8/BTLA/PIK3R2/TESPA1/CLEC6A/IGLV3-19/BTK/IGHV3-23/PSME2/CLEC4A/HLA-DRB1/CD3D/TRAV19/IGLV2-11/PLCL2/IGKV1-16/HLA-DQA2/CD247/RPS3/STAP1/CLEC4E/IGHV3-13/HLA-DPB1/IGKV2-30/IGHV4-39/KLHL6/VAV1/IGHV3-30/LCK/IGKV2…
GO:0002429	immune response-activating cell surface receptor signaling pathway	159/2341	159	BP	399/17910	7.46105e-42	1.99327e-39	GBP1/THEMIS/PTPN22/TRAT1/PTPRC/BTN3A1/FCGR3A/FYB1/CYLD/MNDA/CD3G/CD38/LAX1/ITK/FCRL3/CD226/PSMB9/LYN/HLA-DRA/FCGR1A/IGKV2-29/SLA2/IGKV4-1/NCKAP1L/HLA-DPA1/PSMB8/PIK3R2/TESPA1/CLEC6A/IGLV3-19/BTK/IGHV3-23/PSME2/CLEC4A/HLA-DRB1/CD3D/TRAV19/IGLV2-11/PLCL2/IGKV1-16/HLA-DQA2/CD247/RPS3/STAP1/CLEC4E/IGHV3-13/HLA-DPB1/IGKV2-30/IGHV4-39/KLHL6/VAV1/IGHV3-30/LCK/IGKV2-28/IGHV3-11/IGHG1/CD160/LCP2/HLA-DQA1/…
GO:0032101	regulation of response to external stimulus	262/2341	262	BP	873/17910	1.26352e-41	3.27328e-39	STAT1/CXCL10/IDO1/GBP5/DDX60/DTX3L/PARP9/PTPRC/BIRC3/ABCD2/CYLD/PTGER4/LILRB1/DDX58/GRIN3A/CCL5/PLEK/TLR7/ACOD1/CCL4/NLRC3/CCR2/CXCL13/IL2RA/TLR3/JAK2/APOBEC3G/P2RY12/CR1L/PIK3CG/PIK3AP1/LYN/IFIT1/TLR10/HAVCR2/CD28/AIF1/CD200R1/FPR2/IGKV2-29/CFB/IL27/TLR4/IGKV4-1/NCKAP1L/GPR18/IL12RB1/HLA-E/EPPK1/S100A14/IL15/IGLV3-19/BTK/IGHV3-23/KRT1/RPS19/TLR2/CCR4/SIGLEC11/CCR1/TNFSF14/IL12B/IGLV2-11/IGKV1-16…
GO:0009605	response to external stimulus	523/2341	523	BP	2331/17910	2.31807e-41	5.82858e-39	GBP1/STAT1/CXCL10/CXCL11/IDO1/GBP5/IFI44L/DDX60/IFIH1/TRIM22/DTX3L/IRF1/PARP9/CXCL9/GCH1/IFNG/PTPN22/IFIT3/B2M/IFIT2/PTPRC/RSAD2/GBP3/TNIP3/BIRC3/ABCD2/CCL8/CYBB/CASP5/FASLG/CYLD/CCR5/NLRC5/CLEC7A/PTGER4/LILRB1/DDX58/TLR8/GRIN3A/SAMHD1/CYSLTR1/CCL5/PLEK/TLR7/ACOD1/IFI44/CCL4/NLRC3/CCR2/CXCL13/ERAP1/IFIT5/IL2RA/GZMA/IKZF3/TLR3/BATF2/JAK2/HERC6/SLC8A1/APOBEC3G/TBX21/OAS2/P2RY12/SLPI/CR1L/PIK3CG/PIK…
GO:0006958	complement activation, classical pathway	68/2341	68	BP	91/17910	3.3184e-41	8.10544e-39	IGKV2-29/IGKV4-1/IGLV3-19/IGHV3-23/IGLV2-11/IGKV1-16/IGHV3-13/IGKV2-30/IGHV4-39/IGHV3-30/IGKV2-28/IGHV3-11/IGHG1/IGLV2-14/IGHV4-59/IGKV1-17/IGHV3-33/C1S/IGKC/C2/C1QC/CR1/IGKV5-2/IGLV1-51/IGKV1-39/IGHV1-69/IGLV2-8/IGHV3-48/IGLV2-23/IGKV1D-39/IGLV1-40/IGKV3-20/C1QB/IGLV3-25/IGKV3-15/IGKV3D-20/IGLV1-47/C1QA/SERPING1/IGKV1-5/IGHV4-34/IGLV3-21/IGHV2-5/IGLC2/SUSD4/IGKV1-12/IGHV3-7/C1R/IGKV1D-12/IGLV1-4…
GO:0019724	B cell mediated immunity	96/2341	96	BP	173/17910	2.32018e-40	5.50978e-38	PTPRC/TLR8/TBX21/CD226/CD28/IGKV2-29/SLA2/IGKV4-1/HLA-E/IGLV3-19/BTK/IGHV3-23/CD27/IGLV2-11/IGKV1-16/IGHV3-13/IGKV2-30/IGHV4-39/FGL2/IGHV3-30/IGKV2-28/IGHV3-11/IGHG1/IGLV2-14/IGHV4-59/IGKV1-17/XCL1/IGHV3-33/C1S/IGKC/C2/TNF/C1QC/CR1/IGKV5-2/IGLV1-51/IGKV1-39/CD74/INPP5D/IGHV1-69/IGLV2-8/IGHV3-48/IGLV2-23/IGKV1D-39/IGLV1-40/IGKV3-20/C1QB/IGLV3-25/HLA-DQB1/POU2F2/IGKV3-15/LTA/IGKV3D-20/IGLV1-47/C1QA…
GO:0002694	regulation of leukocyte activation	178/2341	178	BP	492/17910	5.12787e-40	1.18482e-37	PDCD1LG2/IDO1/CD274/IRF1/IFNG/PTPN22/SAMSN1/PTPRC/ICOS/CD80/TIGIT/CYLD/MNDA/LILRB1/CLECL1/CD86/CD38/CCL5/LAX1/CCR2/RASGRP1/FCRL3/CD84/CD2/IL2RA/HLA-DOA/IKZF3/TBX21/CD226/LYN/TNFSF8/HAVCR2/LILRB2/CD28/AIF1/HLA-F/VCAM1/LAG3/SLA2/IL27/DOCK8/TLR4/IL7/TNFSF13B/NCKAP1L/HLA-DMB/IL12RB1/HLA-E/EBI3/IL7R/HLA-DPA1/BTLA/IL15/TESPA1/PDCD1/BTK/CD27/TNFSF14/BANK1/PRDM1/IL12B/RPS3/GAL/SPTA1/VNN1/ZNF683/CD1D/SIRP…
GO:0050865	regulation of cell activation	187/2341	187	BP	535/17910	1.31782e-39	2.96475e-37	PDCD1LG2/IDO1/CD274/IRF1/IFNG/PTPN22/SAMSN1/PTPRC/ICOS/CD80/TIGIT/CYLD/MNDA/LILRB1/CLECL1/CD86/CD38/CCL5/PLEK/LAX1/CCR2/RASGRP1/FCRL3/CD84/CD2/IL2RA/HLA-DOA/IKZF3/JAK2/TBX21/CD226/LYN/TNFSF8/HAVCR2/LILRB2/CD28/AIF1/HLA-F/VCAM1/LAG3/SLA2/IL27/DOCK8/TLR4/IL7/TNFSF13B/NCKAP1L/HLA-DMB/IL12RB1/HLA-E/EBI3/IL7R/HLA-DPA1/BTLA/IL15/TESPA1/PDCD1/BTK/CD27/TNFSF14/BANK1/PRDM1/IL12B/RPS3/GAL/SPTA1/VNN1/ZNF683…
GO:0030449	regulation of complement activation	76/2341	76	BP	116/17910	2.45072e-39	5.37211e-37	CR1L/IGKV2-29/CFB/IGKV4-1/IGLV3-19/IGHV3-23/IGLV2-11/IGKV1-16/IGHV3-13/IGKV2-30/IGHV4-39/IGHV3-30/IGKV2-28/IGHV3-11/IGHG1/IGLV2-14/IGHV4-59/IGKV1-17/C3AR1/IGHV3-33/C1S/IGKC/C2/C1QC/CR1/IGKV5-2/IGLV1-51/IGKV1-39/IGHV1-69/CD5L/IGLV2-8/IGHV3-48/IGLV2-23/IGKV1D-39/IGLV1-40/IGKV3-20/C1QB/IGLV3-25/IGKV3-15/IGKV3D-20/IGLV1-47/C1QA/VSIG4/SERPING1/IGKV1-5/IGHV4-34/IGLV3-21/IGHV2-5/IGLC2/SUSD4/IGKV1-12/IGH…
GO:0006956	complement activation	80/2341	80	BP	128/17910	4.30602e-39	9.20304e-37	CR1L/IGKV2-29/CFB/IGKV4-1/IGLV3-19/IGHV3-23/KRT1/IGLV2-11/IGKV1-16/IGHV3-13/IGKV2-30/IGHV4-39/IGHV3-30/IGKV2-28/IGHV3-11/IGHG1/IGLV2-14/IGHV4-59/IGKV1-17/C3AR1/IGHV3-33/C1S/IGKC/C2/C1QC/CR1/IGKV5-2/IGLV1-51/IGKV1-39/IGHV1-69/CD5L/IGLV2-8/IGHV3-48/IGLV2-23/IGKV1D-39/IGLV1-40/IGKV3-20/FCN1/C1QB/IGLV3-25/IGKV3-15/IGKV3D-20/IGLV1-47/C1QA/VSIG4/SERPING1/IGKV1-5/IGHV4-34/IGLV3-21/IGHV2-5/IGLC2/SUSD4/IG…
GO:0016064	immunoglobulin mediated immune response	94/2341	94	BP	171/17910	4.44625e-39	9.27098e-37	PTPRC/TLR8/TBX21/CD226/CD28/IGKV2-29/IGKV4-1/HLA-E/IGLV3-19/BTK/IGHV3-23/CD27/IGLV2-11/IGKV1-16/IGHV3-13/IGKV2-30/IGHV4-39/FGL2/IGHV3-30/IGKV2-28/IGHV3-11/IGHG1/IGLV2-14/IGHV4-59/IGKV1-17/XCL1/IGHV3-33/C1S/IGKC/C2/TNF/C1QC/CR1/IGKV5-2/IGLV1-51/IGKV1-39/CD74/INPP5D/IGHV1-69/IGLV2-8/IGHV3-48/IGLV2-23/IGKV1D-39/IGLV1-40/IGKV3-20/C1QB/IGLV3-25/HLA-DQB1/POU2F2/IGKV3-15/LTA/IGKV3D-20/IGLV1-47/C1QA/SERP…
GO:2000257	regulation of protein activation cascade	76/2341	76	BP	117/17910	6.11583e-39	1.24486e-36	CR1L/IGKV2-29/CFB/IGKV4-1/IGLV3-19/IGHV3-23/IGLV2-11/IGKV1-16/IGHV3-13/IGKV2-30/IGHV4-39/IGHV3-30/IGKV2-28/IGHV3-11/IGHG1/IGLV2-14/IGHV4-59/IGKV1-17/C3AR1/IGHV3-33/C1S/IGKC/C2/C1QC/CR1/IGKV5-2/IGLV1-51/IGKV1-39/IGHV1-69/CD5L/IGLV2-8/IGHV3-48/IGLV2-23/IGKV1D-39/IGLV1-40/IGKV3-20/C1QB/IGLV3-25/IGKV3-15/IGKV3D-20/IGLV1-47/C1QA/VSIG4/SERPING1/IGKV1-5/IGHV4-34/IGLV3-21/IGHV2-5/IGLC2/SUSD4/IGKV1-12/IGH…
GO:0002526	acute inflammatory response	108/2341	108	BP	220/17910	1.2084e-38	2.40246e-36	CR1L/PIK3CG/APOL2/IGKV2-29/VCAM1/CFB/IGKV4-1/HLA-E/IGLV3-19/BTK/IGHV3-23/IGLV2-11/IGKV1-16/VNN1/IGHV3-13/IGKV2-30/IGHV4-39/IGHV3-30/IGKV2-28/IGHV3-11/CD163/IGHG1/IGLV2-14/IGHV4-59/IGKV1-17/C3AR1/IGHV3-33/C1S/IGKC/F12/C2/TNF/C1QC/CR1/IGKV5-2/S100A8/IGLV1-51/IGKV1-39/NLRP3/IGHV1-69/CD5L/IGLV2-8/IGHV3-48/IGLV2-23/IGKV1D-39/IGLV1-40/IGKV3-20/C1QB/IGLV3-25/CD6/IGKV3-15/IGKV3D-20/IGLV1-47/C1QA/VSIG4/SE…
GO:0050727	regulation of inflammatory response	172/2341	172	BP	479/17910	3.44054e-38	6.68482e-36	IDO1/GBP5/PTPRC/BIRC3/ABCD2/CYLD/PTGER4/CCL5/TLR7/ACOD1/NLRC3/CCR2/IL2RA/TLR3/JAK2/CR1L/PIK3CG/PIK3AP1/LYN/TLR10/CD28/CD200R1/FPR2/IGKV2-29/CFB/TLR4/IGKV4-1/HLA-E/IL15/IGLV3-19/BTK/IGHV3-23/KRT1/RPS19/TLR2/IL12B/IGLV2-11/IGKV1-16/DUOXA1/STAP1/IGHV3-13/IGKV2-30/IGHV4-39/IGHV3-30/SIGLEC10/IGKV2-28/IGHV3-11/IGHG1/FFAR4/IGLV2-14/IGHV4-59/IGKV1-17/C3AR1/XCL1/IGHV3-33/C1S/IGKC/F12/C2/TNF/C1QC/CR1/IGKV5…
GO:0002673	regulation of acute inflammatory response	89/2341	89	BP	160/17910	1.30274e-37	2.47491e-35	CR1L/PIK3CG/IGKV2-29/CFB/IGKV4-1/HLA-E/IGLV3-19/BTK/IGHV3-23/IGLV2-11/IGKV1-16/IGHV3-13/IGKV2-30/IGHV4-39/IGHV3-30/IGKV2-28/IGHV3-11/IGHG1/IGLV2-14/IGHV4-59/IGKV1-17/C3AR1/IGHV3-33/C1S/IGKC/F12/C2/TNF/C1QC/CR1/IGKV5-2/IGLV1-51/IGKV1-39/NLRP3/IGHV1-69/CD5L/IGLV2-8/IGHV3-48/IGLV2-23/IGKV1D-39/IGLV1-40/IGKV3-20/C1QB/IGLV3-25/IGKV3-15/IGKV3D-20/IGLV1-47/C1QA/VSIG4/SERPING1/IGKV1-5/IGHV4-34/IGLV3-21/I…
GO:0051249	regulation of lymphocyte activation	152/2341	152	BP	401/17910	5.52522e-37	1.02685e-34	PDCD1LG2/IDO1/CD274/IRF1/IFNG/PTPN22/SAMSN1/PTPRC/ICOS/CD80/TIGIT/CYLD/MNDA/LILRB1/CLECL1/CD86/CD38/CCL5/LAX1/CCR2/RASGRP1/FCRL3/CD2/IL2RA/HLA-DOA/IKZF3/TBX21/LYN/TNFSF8/HAVCR2/LILRB2/CD28/AIF1/HLA-F/VCAM1/LAG3/SLA2/IL27/DOCK8/TLR4/IL7/TNFSF13B/NCKAP1L/HLA-DMB/IL12RB1/HLA-E/EBI3/IL7R/HLA-DPA1/BTLA/IL15/TESPA1/PDCD1/BTK/CD27/TNFSF14/BANK1/PRDM1/IL12B/RPS3/GAL/SPTA1/VNN1/ZNF683/CD1D/SIRPG/HLA-DPB1/…
GO:0031224	intrinsic component of membrane	915/2436	915	CC	4976/18675	4.92961e-37	1.12888e-34	PDCD1LG2/CD274/SLFN12L/APOL1/GPR171/CRTAM/TRAT1/B2M/PTPRC/BTN3A1/OR2I1P/ABCD2/KLRD1/FCGR3A/TAP1/BTN3A3/ICOS/CD80/TIGIT/TNFRSF9/CYBB/FASLG/GIMAP5/CD69/CCR5/CLEC7A/GIMAP2/PTGER4/GPR141/DRAM1/PLAAT4/LILRB1/TLR8/GRIN3A/CLECL1/CD3G/FCGR1B/CD86/ST8SIA4/TRGC2/CD38/TNFSF10/MS4A6A/LAX1/CD8A/TLR7/CCR2/LY75/LRMP/MARCHF1/ERAP1/FCRL3/CD72/CD84/SLAMF1/HLA-B/CCR8/CD2/ACSL5/ADAM28/IL2RA/HLA-DOA/TRAF3IP3/IL18RAP/…
GO:0072376	protein activation cascade	85/2341	85	BP	151/17910	1.64965e-36	3.0006e-34	CR1L/IGKV2-29/CFB/IGKV4-1/IGLV3-19/IGHV3-23/KRT1/IGLV2-11/IGKV1-16/IGHV3-13/IGKV2-30/IGHV4-39/IGHV3-30/IGKV2-28/IGHV3-11/IGHG1/IGLV2-14/IGHV4-59/IGKV1-17/C3AR1/IGHV3-33/C1S/IGKC/F12/C2/C1QC/CR1/IGKV5-2/IGLV1-51/IGKV1-39/IGHV1-69/CD5L/IGLV2-8/IGHV3-48/IGLV2-23/IGKV1D-39/IGLV1-40/IGKV3-20/FCN1/C1QB/IGLV3-25/IGKV3-15/IGKV3D-20/IGLV1-47/C1QA/VSIG4/SERPING1/IGKV1-5/IGHV4-34/IGLV3-21/IGHV2-5/IGLC2/SUSD…
GO:0007159	leukocyte cell-cell adhesion	133/2341	133	BP	328/17910	4.51794e-36	8.04664e-34	PDCD1LG2/IDO1/CD274/IRF1/IFNG/PTPN22/PTPRC/ICOS/CD80/TIGIT/CYLD/LILRB1/CLECL1/CD86/CCL5/LAX1/CCR2/RASGRP1/IL2RA/TBX21/LYN/HAVCR2/LILRB2/CD28/AIF1/VCAM1/LAG3/DOCK8/IL7/TNFSF13B/NCKAP1L/HLA-DMB/IL12RB1/HLA-E/EBI3/IL7R/HLA-DPA1/BTLA/GCNT1/IL15/TESPA1/PDCD1/CD27/SEMA4D/TNFSF14/IL12B/RPS3/SPTA1/VNN1/CD1D/SIRPG/HLA-DPB1/VAV1/LCK/TSTA3/CD160/XCL1/MAD1L1/TNF/PRKCQ/S100A8/ITGAL/KLRK1/CCL25/CD74/S100A9/LIL…
GO:0070661	leukocyte proliferation	117/2341	117	BP	270/17910	3.90244e-35	6.80856e-33	PDCD1LG2/IDO1/CD274/IRF1/PTPN22/PTPRC/BTN3A1/CCL8/MNDA/LILRB1/CLECL1/CD38/CCL5/CCR2/FCRL3/IL2RA/IKZF3/PIK3CG/LYN/TNFSF8/HAVCR2/LILRB2/CD28/AIF1/VCAM1/DOCK2/IL27/DOCK8/TLR4/IL7/TNFSF13B/NCKAP1L/HLA-DMB/IL12RB1/HLA-E/EBI3/IL7R/HLA-DPA1/IL15/BTK/TNFSF14/IL12B/PLCL2/RPS3/GAL/SPTA1/CD1D/IMPDH2/HLA-DPB1/GPR183/FLT3/XCL1/MAD1L1/PRKCQ/CSF1R/MZB1/CD74/MS4A1/INPP5D/RASAL3/CCDC88B/LST1/PSMB10/ARG1/CSF1/CARD…
GO:0050863	regulation of T cell activation	125/2341	125	BP	307/17910	3.61291e-34	6.17735e-32	PDCD1LG2/IDO1/CD274/IRF1/IFNG/PTPN22/PTPRC/ICOS/CD80/TIGIT/CYLD/LILRB1/CLECL1/CD86/CCL5/LAX1/CCR2/RASGRP1/CD2/IL2RA/HLA-DOA/TBX21/LYN/TNFSF8/HAVCR2/LILRB2/CD28/AIF1/VCAM1/LAG3/IL27/DOCK8/IL7/TNFSF13B/NCKAP1L/HLA-DMB/IL12RB1/HLA-E/EBI3/IL7R/HLA-DPA1/BTLA/IL15/TESPA1/PDCD1/CD27/TNFSF14/PRDM1/IL12B/RPS3/SPTA1/VNN1/ZNF683/CD1D/SIRPG/HLA-DPB1/VAV1/LCK/CD160/XCL1/MAD1L1/PRKCQ/CGAS/CR1/SPINK5/KLRK1/CD74…
GO:0006909	phagocytosis	125/2341	125	BP	308/17910	5.32296e-34	8.92275e-32	PTPRC/FCGR3A/CLEC7A/CD3G/CDC42SE2/SLAMF1/IL15RA/MSR1/LYN/BIN2/IRF8/AIF1/FCGR1A/FPR2/IGKV2-29/DOCK2/TLR4/IGKV4-1/NCKAP1L/IL2RB/ARHGAP25/PIK3R2/IL15/IGLV3-19/IGHV3-23/TLR2/IGLV2-11/IGKV1-16/CD247/STAP1/IGHV3-13/IGKV2-30/IGHV4-39/VAV1/IGHV3-30/IGKV2-28/IGHV3-11/IGHG1/IGLV2-14/IGHV4-59/IGKV1-17/IGHV3-33/IGKC/C2/TNF/IGKV5-2/MYO7A/ITGAL/IGLV1-51/IGKV1-39/IGHV1-69/IGLV2-8/IGHV3-48/IGLV2-23/IGKV1D-39/IGL…
GO:0032943	mononuclear cell proliferation	109/2341	109	BP	246/17910	7.27432e-34	1.19593e-31	PDCD1LG2/IDO1/CD274/IRF1/PTPN22/PTPRC/BTN3A1/MNDA/LILRB1/CLECL1/CD38/CCL5/CCR2/FCRL3/IL2RA/IKZF3/PIK3CG/TNFSF8/HAVCR2/LILRB2/CD28/AIF1/VCAM1/DOCK2/IL27/DOCK8/TLR4/IL7/TNFSF13B/NCKAP1L/HLA-DMB/IL12RB1/HLA-E/EBI3/IL7R/HLA-DPA1/IL15/BTK/TNFSF14/IL12B/PLCL2/RPS3/GAL/SPTA1/CD1D/IMPDH2/HLA-DPB1/GPR183/FLT3/XCL1/MAD1L1/PRKCQ/MZB1/CD74/MS4A1/INPP5D/RASAL3/CCDC88B/LST1/PSMB10/ARG1/CSF1/CARD11/SPN/CD6/IL18…
GO:0016021	integral component of membrane	880/2436	880	CC	4821/18675	7.20802e-34	1.32051e-31	PDCD1LG2/CD274/SLFN12L/GPR171/CRTAM/TRAT1/B2M/PTPRC/BTN3A1/OR2I1P/ABCD2/KLRD1/FCGR3A/TAP1/BTN3A3/ICOS/CD80/TIGIT/TNFRSF9/CYBB/FASLG/GIMAP5/CD69/CCR5/CLEC7A/GIMAP2/PTGER4/GPR141/DRAM1/PLAAT4/LILRB1/TLR8/GRIN3A/CLECL1/CD3G/FCGR1B/CD86/ST8SIA4/TRGC2/CD38/TNFSF10/MS4A6A/LAX1/CD8A/TLR7/CCR2/LY75/LRMP/MARCHF1/ERAP1/FCRL3/CD72/CD84/SLAMF1/HLA-B/CCR8/CD2/ACSL5/ADAM28/IL2RA/HLA-DOA/TRAF3IP3/IL18RAP/IL15RA…
GO:0050867	positive regulation of cell activation	127/2341	127	BP	319/17910	1.58076e-33	2.5498e-31	PDCD1LG2/CD274/IFNG/PTPRC/ICOS/CD80/CYLD/LILRB1/CLECL1/CD86/CD38/CCL5/PLEK/CCR2/RASGRP1/FCRL3/CD2/IL2RA/JAK2/TBX21/CD226/LYN/HAVCR2/LILRB2/CD28/AIF1/HLA-F/VCAM1/DOCK8/TLR4/IL7/TNFSF13B/NCKAP1L/HLA-DMB/IL12RB1/HLA-E/EBI3/IL7R/HLA-DPA1/BTLA/IL15/TESPA1/PDCD1/BTK/CD27/TNFSF14/IL12B/RPS3/SPTA1/VNN1/CD1D/SIRPG/STAP1/HLA-DPB1/GPR183/VAV1/LCK/CD160/XCL1/PRKCQ/TOX/LRRK2/KLRK1/CD74/LILRB4/INPP5D/NLRP3/RAS…
GO:0046651	lymphocyte proliferation	108/2341	108	BP	244/17910	1.63288e-33	2.5851e-31	PDCD1LG2/IDO1/CD274/IRF1/PTPN22/PTPRC/BTN3A1/MNDA/LILRB1/CLECL1/CD38/CCL5/CCR2/FCRL3/IL2RA/IKZF3/PIK3CG/TNFSF8/HAVCR2/LILRB2/CD28/AIF1/VCAM1/DOCK2/IL27/DOCK8/TLR4/IL7/TNFSF13B/NCKAP1L/HLA-DMB/IL12RB1/HLA-E/EBI3/IL7R/HLA-DPA1/IL15/BTK/TNFSF14/IL12B/PLCL2/RPS3/GAL/SPTA1/CD1D/IMPDH2/HLA-DPB1/GPR183/FLT3/XCL1/MAD1L1/PRKCQ/MZB1/CD74/MS4A1/INPP5D/RASAL3/CCDC88B/LST1/PSMB10/ARG1/CARD11/SPN/CD6/IL18/SASH…
GO:0009986	cell surface	203/2436	203	CC	667/18675	3.38998e-33	5.17538e-31	CXCL10/CXCL9/B2M/PTPRC/KLRD1/FCGR3A/ICOS/CD80/TIGIT/TNFRSF9/FASLG/CD69/CCR5/LILRB1/TLR8/CD86/CD38/CD8A/FCRL3/SLAMF1/HLA-B/CD2/IL2RA/IL15RA/FCRL6/P2RY12/CD226/HLA-DRA/PROM2/HAVCR2/LILRB2/CD28/HLA-F/CD200R1/HLA-C/VCAM1/LAG3/CD53/TLR4/HLA-E/CLEC9A/IL7R/IL2RB/HLA-DPA1/IL15/PDCD1/TLR2/CLEC2D/HLA-DRB1/ITGAD/SIGLEC11/CCR1/TSHR/CD244/LY6G6C/CD1D/HLA-DPB1/MRC1/CD163/FCRL2/FCRL1/ADGRE1/CCR9/FCRL4/TNF/CR1/I…
GO:0051707	response to other organism	249/2341	249	BP	903/17910	7.09391e-33	1.10265e-30	GBP1/STAT1/CXCL10/IDO1/GBP5/IFI44L/DDX60/IFIH1/TRIM22/DTX3L/IRF1/PARP9/CXCL9/GCH1/IFNG/PTPN22/IFIT3/B2M/IFIT2/PTPRC/RSAD2/GBP3/TNIP3/BIRC3/CCL8/FASLG/CCR5/NLRC5/CLEC7A/PTGER4/LILRB1/DDX58/TLR8/SAMHD1/CCL5/TLR7/ACOD1/IFI44/CCL4/CXCL13/ERAP1/IFIT5/IL2RA/GZMA/IKZF3/TLR3/BATF2/JAK2/HERC6/APOBEC3G/TBX21/OAS2/SLPI/CD96/LYN/IFIT1/PRF1/TNFSF8/IRF8/NUGGC/HAVCR2/NLRC4/OAS1/CSF2RB/LILRB2/IL10RA/LYZ/CMPK2/FP…
GO:0043207	response to external biotic stimulus	249/2341	249	BP	905/17910	1.04074e-32	1.5888e-30	GBP1/STAT1/CXCL10/IDO1/GBP5/IFI44L/DDX60/IFIH1/TRIM22/DTX3L/IRF1/PARP9/CXCL9/GCH1/IFNG/PTPN22/IFIT3/B2M/IFIT2/PTPRC/RSAD2/GBP3/TNIP3/BIRC3/CCL8/FASLG/CCR5/NLRC5/CLEC7A/PTGER4/LILRB1/DDX58/TLR8/SAMHD1/CCL5/TLR7/ACOD1/IFI44/CCL4/CXCL13/ERAP1/IFIT5/IL2RA/GZMA/IKZF3/TLR3/BATF2/JAK2/HERC6/APOBEC3G/TBX21/OAS2/SLPI/CD96/LYN/IFIT1/PRF1/TNFSF8/IRF8/NUGGC/HAVCR2/NLRC4/OAS1/CSF2RB/LILRB2/IL10RA/LYZ/CMPK2/FP…
GO:0070663	regulation of leukocyte proliferation	98/2341	98	BP	214/17910	5.30695e-32	7.9595e-30	PDCD1LG2/IDO1/CD274/IRF1/PTPN22/PTPRC/CCL8/MNDA/LILRB1/CLECL1/CD38/CCL5/CCR2/FCRL3/IL2RA/IKZF3/LYN/TNFSF8/HAVCR2/LILRB2/CD28/AIF1/VCAM1/IL27/TLR4/IL7/TNFSF13B/NCKAP1L/HLA-DMB/IL12RB1/HLA-E/EBI3/HLA-DPA1/IL15/BTK/IL12B/RPS3/GAL/SPTA1/CD1D/HLA-DPB1/GPR183/XCL1/MAD1L1/PRKCQ/MZB1/CD74/INPP5D/RASAL3/CCDC88B/LST1/ARG1/CSF1/CARD11/SPN/CD6/IL18/SASH3/VSIG4/TNFRSF1B/TNFSF18/CD3E/CD300A/PTPN6/CORO1A/EPO/SF…
GO:0019221	cytokine-mediated signaling pathway	220/2341	220	BP	764/17910	5.6404e-32	8.31375e-30	GBP1/STAT1/CXCL10/CXCL11/PARP14/XAF1/TRIM22/IRF1/PARP9/IFNG/IFIT3/B2M/IFIT2/PTPRC/RSAD2/BIRC3/CD80/TNFRSF9/GBP2/FASLG/CYLD/CCR5/NMI/NLRC5/SAMHD1/FCGR1B/CD86/CCL5/CIITA/SOD2/CCL4/CCR2/HLA-B/CCR8/IL2RA/IL18RAP/IL15RA/JAK2/SP100/STAT4/OAS2/PSMB9/HLA-DRA/IFIT1/TNFSF8/IRF8/CXCR6/OAS1/CSF2RB/IL10RA/TRIM21/FCGR1A/HLA-F/HLA-C/VCAM1/IL27/IL7/TNFSF13B/IL12RB1/HLA-E/EBI3/IL7R/IL2RB/HLA-DPA1/PSMB8/UBA52/IL15…
GO:0032944	regulation of mononuclear cell proliferation	94/2341	94	BP	200/17910	7.39311e-32	1.07125e-29	PDCD1LG2/IDO1/CD274/IRF1/PTPN22/PTPRC/MNDA/LILRB1/CLECL1/CD38/CCL5/CCR2/FCRL3/IL2RA/IKZF3/TNFSF8/HAVCR2/LILRB2/CD28/AIF1/VCAM1/IL27/TLR4/IL7/TNFSF13B/NCKAP1L/HLA-DMB/IL12RB1/HLA-E/EBI3/HLA-DPA1/IL15/BTK/IL12B/RPS3/GAL/SPTA1/CD1D/HLA-DPB1/GPR183/XCL1/MAD1L1/PRKCQ/MZB1/CD74/INPP5D/RASAL3/CCDC88B/LST1/ARG1/CSF1/CARD11/SPN/CD6/IL18/SASH3/VSIG4/TNFRSF1B/TNFSF18/CD3E/CD300A/PTPN6/CORO1A/EPO/SFTPD/TYROB…
GO:0002696	positive regulation of leukocyte activation	121/2341	121	BP	305/17910	8.14434e-32	1.16043e-29	PDCD1LG2/CD274/IFNG/PTPRC/ICOS/CD80/CYLD/LILRB1/CLECL1/CD86/CD38/CCL5/CCR2/RASGRP1/FCRL3/CD2/IL2RA/TBX21/CD226/LYN/HAVCR2/LILRB2/CD28/AIF1/HLA-F/VCAM1/DOCK8/TLR4/IL7/TNFSF13B/NCKAP1L/HLA-DMB/IL12RB1/HLA-E/EBI3/IL7R/HLA-DPA1/BTLA/IL15/TESPA1/PDCD1/BTK/CD27/TNFSF14/IL12B/RPS3/SPTA1/VNN1/CD1D/SIRPG/STAP1/HLA-DPB1/GPR183/VAV1/LCK/CD160/XCL1/PRKCQ/TOX/LRRK2/KLRK1/CD74/LILRB4/INPP5D/NLRP3/RASAL3/CCDC88…
GO:0009607	response to biotic stimulus	253/2341	253	BP	938/17910	9.78672e-32	1.37158e-29	GBP1/STAT1/CXCL10/IDO1/CD274/GBP5/IFI44L/DDX60/IFIH1/TRIM22/DTX3L/IRF1/PARP9/CXCL9/GCH1/IFNG/PTPN22/CRTAM/IFIT3/B2M/IFIT2/PTPRC/RSAD2/GBP3/TNIP3/BIRC3/CCL8/FASLG/CCR5/NLRC5/CLEC7A/PTGER4/LILRB1/DDX58/TLR8/SAMHD1/CCL5/TLR7/ACOD1/IFI44/CCL4/CXCL13/ERAP1/IFIT5/IL2RA/GZMA/IKZF3/TLR3/BATF2/JAK2/HERC6/APOBEC3G/TBX21/OAS2/CD226/SLPI/CD96/LYN/IFIT1/PRF1/TNFSF8/IRF8/NUGGC/HAVCR2/NLRC4/OAS1/CSF2RB/LILRB2/I…
GO:1903037	regulation of leukocyte cell-cell adhesion	118/2341	118	BP	295/17910	1.90171e-31	2.62221e-29	PDCD1LG2/IDO1/CD274/IRF1/IFNG/PTPN22/PTPRC/ICOS/CD80/TIGIT/CYLD/LILRB1/CLECL1/CD86/CCL5/LAX1/CCR2/RASGRP1/IL2RA/TBX21/LYN/HAVCR2/LILRB2/CD28/AIF1/VCAM1/LAG3/DOCK8/IL7/TNFSF13B/NCKAP1L/HLA-DMB/IL12RB1/HLA-E/EBI3/IL7R/HLA-DPA1/BTLA/IL15/TESPA1/PDCD1/CD27/TNFSF14/IL12B/RPS3/SPTA1/VNN1/CD1D/SIRPG/HLA-DPB1/VAV1/LCK/CD160/XCL1/MAD1L1/TNF/PRKCQ/KLRK1/CCL25/CD74/LILRB4/NLRP3/RASAL3/CCDC88B/ARG1/CARD11/SP…
GO:0050670	regulation of lymphocyte proliferation	93/2341	93	BP	199/17910	2.74343e-31	3.72279e-29	PDCD1LG2/IDO1/CD274/IRF1/PTPN22/PTPRC/MNDA/LILRB1/CLECL1/CD38/CCL5/CCR2/FCRL3/IL2RA/IKZF3/TNFSF8/HAVCR2/LILRB2/CD28/AIF1/VCAM1/IL27/TLR4/IL7/TNFSF13B/NCKAP1L/HLA-DMB/IL12RB1/HLA-E/EBI3/HLA-DPA1/IL15/BTK/IL12B/RPS3/GAL/SPTA1/CD1D/HLA-DPB1/GPR183/XCL1/MAD1L1/PRKCQ/MZB1/CD74/INPP5D/RASAL3/CCDC88B/LST1/ARG1/CARD11/SPN/CD6/IL18/SASH3/VSIG4/TNFRSF1B/TNFSF18/CD3E/CD300A/PTPN6/CORO1A/EPO/SFTPD/TYROBP/TNF…
GO:0001816	cytokine production	218/2341	218	BP	765/17910	5.65455e-31	7.55324e-29	GBP1/STAT1/PDCD1LG2/IDO1/CD274/GBP5/DDX60/IFIH1/IRF1/IFNG/PTPN22/CRTAM/B2M/PTPRC/BTN3A1/RSAD2/BIRC3/ABCD2/CD80/TIGIT/CYBB/CYLD/NMI/NLRC5/SRGN/PTGER4/LILRB1/DDX58/TLR8/CLECL1/CD86/ZBP1/TLR7/ACOD1/NLRC3/CCR2/ITK/RASGRP1/CD84/SLAMF1/CD2/IL18RAP/TLR3/JAK2/TBX21/PIK3CG/CD96/LYN/BTN3A2/IRF8/TLR10/HAVCR2/NLRC4/LILRB2/CD28/TRIM21/AIF1/HLA-F/CD200R1/UBE2L6/LAG3/SLAMF6/UBA7/IL27/TLR4/IL7/NCKAP1L/GPR18/IL12…
GO:0005576	extracellular region	791/2436	791	CC	4295/18675	7.1541e-31	9.36165e-29	GBP1/CXCL10/CXCL11/PDCD1LG2/CD274/LAP3/APOL1/CXCL9/IFNG/B2M/PTPRC/APOL3/FCGR3A/ICOS/FASLG/TMEM155/MNDA/SRGN/LILRB1/CTSS/CD86/CD38/GZMK/TNFSF10/CCL5/PLEK/CD8A/KRT17/SOD2/CCL4/CXCL13/LY75/XCL2/ERAP1/APOL4/SLAMF1/CD2/ADAM28/GZMA/IL15RA/KIR3DX1/SBSN/MSR1/KRT10/SLPI/CR1L/PSMB9/LYN/HLA-DRA/PRF1/APOL2/BIN2/VNN2/TNFSF8/PROM2/CD48/RPL37A/WARS1/OAS1/ADAMDEC1/LILRB2/SFN/LYZ/CD200R1/FLG2/PI3/IGKV2-29/CD8B/VC…
GO:1903317	regulation of protein maturation	84/2341	84	BP	175/17910	2.03268e-29	2.67345e-27	CR1L/IGKV2-29/CFB/IGKV4-1/IGLV3-19/IGHV3-23/IGLV2-11/IGKV1-16/IGHV3-13/IGKV2-30/IGHV4-39/IGHV3-30/IGKV2-28/IGHV3-11/IGHG1/IGLV2-14/IGHV4-59/IGKV1-17/C3AR1/IGHV3-33/C1S/IGKC/F12/C2/C1QC/CR1/IGKV5-2/LRRK2/IGLV1-51/IGKV1-39/CST7/IGHV1-69/CD5L/IGLV2-8/IGHV3-48/IGLV2-23/IGKV1D-39/IGLV1-40/IGKV3-20/C1QB/IGLV3-25/NLRP7/IGKV3-15/IGKV3D-20/IGLV1-47/C1QA/ANGPTL8/VSIG4/SERPING1/IGKV1-5/IGHV4-34/IGLV3-21/IGH…
GO:0070613	regulation of protein processing	83/2341	83	BP	173/17910	4.59368e-29	5.95021e-27	CR1L/IGKV2-29/CFB/IGKV4-1/IGLV3-19/IGHV3-23/IGLV2-11/IGKV1-16/IGHV3-13/IGKV2-30/IGHV4-39/IGHV3-30/IGKV2-28/IGHV3-11/IGHG1/IGLV2-14/IGHV4-59/IGKV1-17/C3AR1/IGHV3-33/C1S/IGKC/F12/C2/C1QC/CR1/IGKV5-2/LRRK2/IGLV1-51/IGKV1-39/CST7/IGHV1-69/CD5L/IGLV2-8/IGHV3-48/IGLV2-23/IGKV1D-39/IGLV1-40/IGKV3-20/C1QB/IGLV3-25/NLRP7/IGKV3-15/IGKV3D-20/IGLV1-47/C1QA/ANGPTL8/VSIG4/SERPING1/IGKV1-5/IGHV4-34/IGLV3-21/IGH…
GO:0051251	positive regulation of lymphocyte activation	105/2341	105	BP	258/17910	7.55948e-29	9.64567e-27	PDCD1LG2/CD274/IFNG/PTPRC/ICOS/CD80/CYLD/LILRB1/CLECL1/CD86/CD38/CCL5/CCR2/RASGRP1/FCRL3/IL2RA/TBX21/LYN/HAVCR2/LILRB2/CD28/AIF1/HLA-F/VCAM1/DOCK8/TLR4/IL7/TNFSF13B/NCKAP1L/HLA-DMB/IL12RB1/HLA-E/EBI3/IL7R/HLA-DPA1/BTLA/IL15/TESPA1/PDCD1/BTK/CD27/TNFSF14/IL12B/RPS3/SPTA1/VNN1/CD1D/SIRPG/HLA-DPB1/GPR183/VAV1/LCK/CD160/XCL1/PRKCQ/TOX/KLRK1/CD74/LILRB4/INPP5D/NLRP3/RASAL3/CCDC88B/CARD11/CD6/SOCS1/CCL…
GO:0050870	positive regulation of T cell activation	89/2341	89	BP	198/17910	1.98689e-28	2.49793e-26	PDCD1LG2/CD274/IFNG/PTPRC/ICOS/CD80/CYLD/LILRB1/CLECL1/CD86/CCL5/CCR2/RASGRP1/IL2RA/LYN/HAVCR2/LILRB2/CD28/AIF1/VCAM1/DOCK8/IL7/TNFSF13B/NCKAP1L/HLA-DMB/IL12RB1/HLA-E/EBI3/IL7R/HLA-DPA1/BTLA/IL15/TESPA1/PDCD1/CD27/TNFSF14/IL12B/RPS3/SPTA1/VNN1/CD1D/SIRPG/HLA-DPB1/VAV1/LCK/CD160/XCL1/PRKCQ/KLRK1/CD74/LILRB4/NLRP3/RASAL3/CCDC88B/CARD11/CD6/SOCS1/CCL2/IL18/SASH3/CD3E/PTPN6/CORO1A/EPO/TNFSF4/NOD2/CD4…
GO:1903039	positive regulation of leukocyte cell-cell adhesion	93/2341	93	BP	214/17910	2.85196e-28	3.53354e-26	PDCD1LG2/CD274/IFNG/PTPRC/ICOS/CD80/CYLD/LILRB1/CLECL1/CD86/CCL5/CCR2/RASGRP1/IL2RA/LYN/HAVCR2/LILRB2/CD28/AIF1/VCAM1/DOCK8/IL7/TNFSF13B/NCKAP1L/HLA-DMB/IL12RB1/HLA-E/EBI3/IL7R/HLA-DPA1/BTLA/IL15/TESPA1/PDCD1/CD27/TNFSF14/IL12B/RPS3/SPTA1/VNN1/CD1D/SIRPG/HLA-DPB1/VAV1/LCK/CD160/XCL1/TNF/PRKCQ/KLRK1/CD74/LILRB4/NLRP3/RASAL3/CCDC88B/CARD11/CD6/SOCS1/CCL2/IL18/SASH3/PTAFR/CD3E/PTPN6/CORO1A/EPO/TNFSF…
GO:0022409	positive regulation of cell-cell adhesion	102/2341	102	BP	251/17910	5.39918e-28	6.59394e-26	PDCD1LG2/CD274/IFNG/PTPRC/ICOS/CD80/CYLD/LILRB1/CLECL1/CD86/CCL5/CCR2/CXCL13/RASGRP1/IL2RA/LYN/HAVCR2/LILRB2/CD28/AIF1/VCAM1/DOCK8/IL7/TNFSF13B/NCKAP1L/HLA-DMB/IL12RB1/HLA-E/EBI3/IL7R/HLA-DPA1/BTLA/IL15/TESPA1/PDCD1/CD27/TNFSF14/IL12B/RPS3/SPTA1/VNN1/CD1D/SIRPG/HLA-DPB1/VAV1/LCK/CD160/XCL1/TNF/PRKCQ/KLRK1/CD74/LILRB4/NLRP3/RASAL3/CCDC88B/CARD11/CD6/SOCS1/CCL2/IL18/SASH3/PTAFR/CD3E/PTPN6/CORO1A/EP…
GO:0001817	regulation of cytokine production	198/2341	198	BP	698/17910	7.04494e-28	8.4827e-26	GBP1/STAT1/PDCD1LG2/IDO1/CD274/GBP5/DDX60/IFIH1/IRF1/IFNG/PTPN22/CRTAM/B2M/PTPRC/RSAD2/BIRC3/ABCD2/CD80/TIGIT/CYBB/CYLD/NMI/NLRC5/SRGN/PTGER4/LILRB1/DDX58/TLR8/CD86/ZBP1/TLR7/ACOD1/NLRC3/CCR2/RASGRP1/CD84/SLAMF1/CD2/TLR3/JAK2/TBX21/CD96/LYN/IRF8/TLR10/HAVCR2/LILRB2/CD28/TRIM21/AIF1/HLA-F/CD200R1/UBE2L6/LAG3/SLAMF6/UBA7/IL27/TLR4/IL7/NCKAP1L/GPR18/IL12RB1/HLA-E/CLEC9A/EBI3/HLA-DPA1/IL15/CLEC6A/BTK…
GO:0038094	Fc-gamma receptor signaling pathway	72/2341	72	BP	141/17910	1.56366e-27	1.85663e-25	PTPRC/FCGR3A/CD3G/LYN/FCGR1A/IGKV2-29/IGKV4-1/NCKAP1L/PIK3R2/IGLV3-19/IGHV3-23/IGLV2-11/IGKV1-16/CD247/CLEC4E/IGHV3-13/IGKV2-30/IGHV4-39/VAV1/IGHV3-30/IGKV2-28/IGHV3-11/IGHG1/IGLV2-14/IGHV4-59/IGKV1-17/IGHV3-33/IGKC/IGKV5-2/IGLV1-51/IGKV1-39/IGHV1-69/IGLV2-8/IGHV3-48/IGLV2-23/IGKV1D-39/IGLV1-40/IGKV3-20/HCK/IGLV3-25/IGKV3-15/IGKV3D-20/IGLV1-47/CLEC4D/IGKV1-5/IGHV4-34/IGLV3-21/IGHV2-5/IGLC2/MYO1G/…
GO:0071345	cellular response to cytokine stimulus	269/2341	269	BP	1084/17910	2.0865e-27	2.44349e-25	GBP1/STAT1/CXCL10/CXCL11/PARP14/XAF1/GBP5/GBP4/TRIM22/IRF1/PARP9/IFNG/IFIT3/B2M/IFIT2/PTPRC/RSAD2/GBP3/BIRC3/PYHIN1/CD80/TNFRSF9/GBP2/FASLG/CYLD/MNDA/CCR5/NMI/NLRC5/SAMHD1/FCGR1B/CD86/CCL5/CIITA/ACOD1/SOD2/CCL4/CCR2/HLA-B/CCR8/IL2RA/IL18RAP/IL15RA/TLR3/JAK2/SP100/STAT4/OAS2/PSMB9/HLA-DRA/IFIT1/TNFSF8/IRF8/CXCR6/OAS1/CSF2RB/IL10RA/TRIM21/AIF1/FCGR1A/HLA-F/HLA-C/VCAM1/RPS2/IL27/DOCK8/TLR4/IL7/TNFSF…
GO:0098609	cell-cell adhesion	211/2341	211	BP	771/17910	2.18185e-27	2.52063e-25	PDCD1LG2/IDO1/CD274/IRF1/IFNG/PTPN22/PTPRC/ICOS/CD80/TIGIT/CYLD/LILRB1/CLECL1/CD86/CCL5/PLEK/LAX1/CCR2/CXCL13/RASGRP1/CD84/CD2/IL2RA/JAK2/TBX21/P2RY12/PIK3CG/LYN/HAVCR2/LILRB2/CD28/AIF1/CD200R1/VCAM1/LAG3/DOCK8/IL7/TNFSF13B/NCKAP1L/HLA-DMB/IL12RB1/HLA-E/EBI3/IL7R/TRIM29/HLA-DPA1/BTLA/GCNT1/IL15/TESPA1/PDCD1/CD27/ITGAD/SEMA4D/TNFSF14/NECTIN1/IL12B/TENM2/RPS3/SPTA1/VNN1/CD1D/DSC3/TACSTD2/SIRPG/CAMS…
GO:0022407	regulation of cell-cell adhesion	133/2341	133	BP	389/17910	2.75487e-27	3.14019e-25	PDCD1LG2/IDO1/CD274/IRF1/IFNG/PTPN22/PTPRC/ICOS/CD80/TIGIT/CYLD/LILRB1/CLECL1/CD86/CCL5/LAX1/CCR2/CXCL13/RASGRP1/IL2RA/JAK2/TBX21/LYN/HAVCR2/LILRB2/CD28/AIF1/VCAM1/LAG3/DOCK8/IL7/TNFSF13B/NCKAP1L/HLA-DMB/IL12RB1/HLA-E/EBI3/IL7R/HLA-DPA1/BTLA/IL15/TESPA1/PDCD1/CD27/TNFSF14/IL12B/RPS3/SPTA1/VNN1/CD1D/SIRPG/HLA-DPB1/VAV1/LCK/CD160/XCL1/MAD1L1/TNF/PRKCQ/KLRK1/CCL25/CD74/LILRB4/NLRP3/RASAL3/CCDC88B/AR…
GO:0007155	cell adhesion	312/2341	312	BP	1338/17910	8.95211e-27	1.00699e-24	GBP1/PDCD1LG2/IDO1/CD274/IRF1/IFNG/PTPN22/PTPRC/ICOS/CD80/TIGIT/CYLD/LILRB1/CLECL1/CD86/CCL5/PLEK/LAX1/CCL4/CCR2/CXCL13/RASGRP1/CD72/CD84/SLAMF1/CCR8/CD2/IL2RA/JAK2/TBX21/P2RY12/CD226/PIK3CG/CD96/LYN/HAVCR2/ADAMDEC1/LILRB2/CD28/AIF1/CD200R1/FPR2/FLG2/VCAM1/LAG3/CYTIP/DOCK8/IL7/TNFSF13B/NCKAP1L/HLA-DMB/IL12RB1/HLA-E/EBI3/IL7R/TRIM29/HLA-DPA1/BTLA/GCNT1/IL15/TESPA1/PDCD1/CASS4/CLCA2/CLEC4A/PKP1/CD2…
GO:0002431	Fc receptor mediated stimulatory signaling pathway	71/2341	71	BP	142/17910	1.92928e-26	2.142e-24	PTPRC/FCGR3A/CD3G/CD226/LYN/FCGR1A/IGKV2-29/IGKV4-1/NCKAP1L/PIK3R2/IGLV3-19/IGHV3-23/IGLV2-11/IGKV1-16/CD247/IGHV3-13/IGKV2-30/IGHV4-39/VAV1/IGHV3-30/IGKV2-28/IGHV3-11/IGHG1/IGLV2-14/IGHV4-59/IGKV1-17/IGHV3-33/IGKC/IGKV5-2/IGLV1-51/IGKV1-39/IGHV1-69/IGLV2-8/IGHV3-48/IGLV2-23/IGKV1D-39/IGLV1-40/IGKV3-20/HCK/IGLV3-25/IGKV3-15/IGKV3D-20/IGLV1-47/IGKV1-5/IGHV4-34/IGLV3-21/IGHV2-5/IGLC2/MYO1G/IGKV1-12…
GO:0022610	biological adhesion	312/2341	312	BP	1345/17910	2.30069e-26	2.52161e-24	GBP1/PDCD1LG2/IDO1/CD274/IRF1/IFNG/PTPN22/PTPRC/ICOS/CD80/TIGIT/CYLD/LILRB1/CLECL1/CD86/CCL5/PLEK/LAX1/CCL4/CCR2/CXCL13/RASGRP1/CD72/CD84/SLAMF1/CCR8/CD2/IL2RA/JAK2/TBX21/P2RY12/CD226/PIK3CG/CD96/LYN/HAVCR2/ADAMDEC1/LILRB2/CD28/AIF1/CD200R1/FPR2/FLG2/VCAM1/LAG3/CYTIP/DOCK8/IL7/TNFSF13B/NCKAP1L/HLA-DMB/IL12RB1/HLA-E/EBI3/IL7R/TRIM29/HLA-DPA1/BTLA/GCNT1/IL15/TESPA1/PDCD1/CASS4/CLCA2/CLEC4A/PKP1/CD2…
GO:0002433	immune response-regulating cell surface receptor signaling pathway involved in phagocytosis	70/2341	70	BP	139/17910	2.49201e-26	2.66302e-24	PTPRC/FCGR3A/CD3G/LYN/FCGR1A/IGKV2-29/IGKV4-1/NCKAP1L/PIK3R2/IGLV3-19/IGHV3-23/IGLV2-11/IGKV1-16/CD247/IGHV3-13/IGKV2-30/IGHV4-39/VAV1/IGHV3-30/IGKV2-28/IGHV3-11/IGHG1/IGLV2-14/IGHV4-59/IGKV1-17/IGHV3-33/IGKC/IGKV5-2/IGLV1-51/IGKV1-39/IGHV1-69/IGLV2-8/IGHV3-48/IGLV2-23/IGKV1D-39/IGLV1-40/IGKV3-20/HCK/IGLV3-25/IGKV3-15/IGKV3D-20/IGLV1-47/IGKV1-5/IGHV4-34/IGLV3-21/IGHV2-5/IGLC2/MYO1G/IGKV1-12/WAS/I…
GO:0038096	Fc-gamma receptor signaling pathway involved in phagocytosis	70/2341	70	BP	139/17910	2.49201e-26	2.66302e-24	PTPRC/FCGR3A/CD3G/LYN/FCGR1A/IGKV2-29/IGKV4-1/NCKAP1L/PIK3R2/IGLV3-19/IGHV3-23/IGLV2-11/IGKV1-16/CD247/IGHV3-13/IGKV2-30/IGHV4-39/VAV1/IGHV3-30/IGKV2-28/IGHV3-11/IGHG1/IGLV2-14/IGHV4-59/IGKV1-17/IGHV3-33/IGKC/IGKV5-2/IGLV1-51/IGKV1-39/IGHV1-69/IGLV2-8/IGHV3-48/IGLV2-23/IGKV1D-39/IGLV1-40/IGKV3-20/HCK/IGLV3-25/IGKV3-15/IGKV3D-20/IGLV1-47/IGKV1-5/IGHV4-34/IGLV3-21/IGHV2-5/IGLC2/MYO1G/IGKV1-12/WAS/I…
GO:0034097	response to cytokine	280/2341	280	BP	1167/17910	4.93903e-26	5.21281e-24	GBP1/STAT1/CXCL10/CXCL11/PARP14/XAF1/CD274/GBP5/GBP4/UBD/IFIH1/TRIM22/IRF1/PARP9/GCH1/IFNG/IFIT3/B2M/IFIT2/PTPRC/RSAD2/GBP3/BIRC3/PYHIN1/CD80/TNFRSF9/GBP2/FASLG/CYLD/MNDA/CCR5/NMI/NLRC5/DDX58/SAMHD1/FCGR1B/CD86/CD38/CCL5/CIITA/ACOD1/SOD2/CCL4/CCR2/HLA-B/CCR8/IL2RA/IL18RAP/IL15RA/TLR3/JAK2/SP100/STAT4/OAS2/PSMB9/HLA-DRA/IFIT1/TNFSF8/IRF8/CXCR6/OAS1/CSF2RB/IL10RA/TRIM21/AIF1/FCGR1A/HLA-F/HLA-C/VCAM…
GO:0030098	lymphocyte differentiation	115/2341	115	BP	325/17910	3.50945e-25	3.65882e-23	THEMIS/IRF1/IFNG/PTPN22/B2M/PTPRC/RSAD2/CD80/CYLD/PTGER4/CD86/CCR2/RASGRP1/FCRL3/CD2/IL2RA/HLA-DOA/IKZF3/TBX21/LILRB2/CD28/VCAM1/LAG3/RHOH/DOCK2/SLAMF6/IL27/IL7/NCKAP1L/GPR18/IL12RB1/IL7R/IL15/TESPA1/IKZF1/PLA2G2D/DOCK11/BTK/CD27/CD3D/PRDM1/IL12B/PLCL2/VNN1/ZNF683/CD1D/CLEC4E/GPR183/VAV1/LCK/FLT3/JAG2/CCR9/CR1/TOX/SPINK5/SLAMF8/CD74/LILRB4/MS4A1/INPP5D/NLRP3/CARD11/SPN/POU2F2/SOCS1/IL18/SASH3/CLE…
GO:0016485	protein processing	108/2341	108	BP	295/17910	4.22964e-25	4.35652e-23	SRGN/CTSS/CR1L/IGKV2-29/CFB/ASPRV1/IGKV4-1/IGLV3-19/IGHV3-23/IGLV2-11/IGKV1-16/IGHV3-13/IGKV2-30/IGHV4-39/IGHV3-30/IGKV2-28/IGHV3-11/IGHG1/IGLV2-14/IGHV4-59/IGKV1-17/C3AR1/IGHV3-33/C1S/IGKC/F12/C2/C1QC/CR1/IGKV5-2/LRRK2/IGLV1-51/KLK13/IGKV1-39/CST7/IGHV1-69/CD5L/IGLV2-8/IGHV3-48/IGLV2-23/IGKV1D-39/ECE2/IGLV1-40/IGKV3-20/C1QB/IGLV3-25/NLRP7/IGKV3-15/IGKV3D-20/IGLV1-47/LGMN/LHB/C1QA/ANGPTL8/VSIG4/S…
GO:0080134	regulation of response to stress	348/2341	348	BP	1592/17910	1.73202e-24	1.76274e-22	STAT1/PARP14/IDO1/GBP5/DDX60/IFIH1/SH2D1A/DTX3L/IRF1/PARP9/GCH1/IFNG/PTPN22/CRTAM/PTPRC/RSAD2/TNIP3/BIRC3/ABCD2/PYHIN1/CYLD/MNDA/NMI/NLRC5/CLEC7A/PTGER4/LILRB1/DDX58/TLR8/CTSS/SAMHD1/CCL5/PLEK/TLR7/ACOD1/SOD2/NLRC3/CCR2/RASGRP1/ERAP1/FCRL3/SLAMF1/IL2RA/IL18RAP/TLR3/JAK2/APOBEC3G/CD226/CR1L/PIK3CG/PIK3AP1/CD96/PSMB9/LYN/IFIT1/TLR10/HAVCR2/NLRC4/CD28/HLA-F/CD200R1/FPR2/IGKV2-29/CFB/LAG3/SLAMF6/IL27…
GO:0009617	response to bacterium	168/2341	168	BP	588/17910	4.02709e-24	4.0503e-22	CXCL10/IDO1/GBP5/GCH1/PTPN22/B2M/TNIP3/FASLG/CCR5/NLRC5/PTGER4/LILRB1/CCL5/ACOD1/IFI44/CXCL13/ERAP1/GZMA/IKZF3/TLR3/JAK2/HERC6/OAS2/SLPI/CD96/LYN/TNFSF8/IRF8/NUGGC/HAVCR2/NLRC4/CSF2RB/LILRB2/IL10RA/LYZ/CMPK2/FPR2/VCAM1/IL27/TLR4/HLA-E/S100A14/MPEG1/JCHAIN/RPS19/TLR2/TLR1/CCR4/SIGLEC11/BANK1/IL12B/LY6G6C/CD1D/KLK5/STAP1/CLEC4E/KLHL6/MRC1/PLAC8/CD160/PTGER2/S100A7/KRT6A/NEXN/TNF/S100A8/SPINK5/KLRK1…
GO:0042129	regulation of T cell proliferation	70/2341	70	BP	149/17910	4.92732e-24	4.89809e-22	PDCD1LG2/IDO1/CD274/IRF1/PTPRC/LILRB1/CLECL1/CCL5/CCR2/IL2RA/TNFSF8/HAVCR2/LILRB2/CD28/AIF1/VCAM1/IL27/TNFSF13B/NCKAP1L/HLA-DMB/IL12RB1/HLA-E/EBI3/HLA-DPA1/IL15/IL12B/RPS3/SPTA1/CD1D/HLA-DPB1/XCL1/MAD1L1/PRKCQ/RASAL3/CCDC88B/ARG1/CARD11/SPN/CD6/IL18/SASH3/VSIG4/TNFRSF1B/TNFSF18/CD3E/PTPN6/CORO1A/EPO/SFTPD/TNFSF4/IL20RB/CD4/FOXJ1/RAC2/IL23R/LGALS9/ZAP70/CD40LG/CD209/LMO1/CD24/CD70/IL10/IHH/HLA-G/I…
GO:0042098	T cell proliferation	77/2341	77	BP	177/17910	1.16419e-23	1.14399e-21	PDCD1LG2/IDO1/CD274/IRF1/PTPRC/BTN3A1/LILRB1/CLECL1/CCL5/CCR2/IL2RA/PIK3CG/TNFSF8/HAVCR2/LILRB2/CD28/AIF1/VCAM1/DOCK2/IL27/DOCK8/TNFSF13B/NCKAP1L/HLA-DMB/IL12RB1/HLA-E/EBI3/HLA-DPA1/IL15/TNFSF14/IL12B/RPS3/SPTA1/CD1D/HLA-DPB1/XCL1/MAD1L1/PRKCQ/RASAL3/CCDC88B/PSMB10/ARG1/CARD11/SPN/CD6/IL18/SASH3/VSIG4/TNFRSF1B/TNFSF18/CD3E/PTPN6/CORO1A/EPO/SFTPD/TNFSF4/IL20RB/CD4/FOXJ1/RAC2/IL23R/LGALS9/ZAP70/CD4…
GO:0006950	response to stress	686/2341	686	BP	3822/17910	1.03024e-22	1.00085e-20	GBP1/STAT1/CXCL10/PARP14/XAF1/IDO1/GBP5/GBP4/IFI44L/UBD/DDX60/IFIH1/TRIM22/TFEC/SH2D1A/DTX3L/APOL1/IRF1/PARP9/CXCL9/GCH1/IFNG/PTPN22/CRTAM/TRAT1/IFIT3/B2M/IFIT2/PTPRC/APOL3/RSAD2/GBP3/TNIP3/BIRC3/ABCD2/PYHIN1/KLRD1/TAP1/GBP2/CYBB/CYLD/MNDA/CCR5/NMI/IPCEF1/NLRC5/CLEC7A/PTGER4/LILRB1/DDX58/TLR8/CTSS/SAMHD1/FCGR1B/CD38/ZBP1/CYSLTR1/CCL5/PLEK/TLR7/CIITA/ACOD1/SOD2/NLRC3/CCR2/CXCL13/ITK/LY75/RASGRP1/E…
GO:0098552	side of membrane	118/2436	118	CC	359/18675	9.94822e-23	1.13907e-20	CXCL10/AKAP5/CXCL9/PTPN22/B2M/PTPRC/KLRD1/FCGR3A/ICOS/TNFRSF9/FASLG/CYLD/CD69/CCR5/LILRB1/TLR8/CD8A/HLA-B/CD2/IL2RA/FCRL6/P2RY12/HLA-DRA/CD28/HLA-F/HLA-C/VCAM1/LAG3/TLR4/HLA-E/IL7R/IL2RB/HLA-DPA1/PDCD1/RPS28/HLA-DRB1/CCR1/ATP2C2/HLA-DQA2/CD244/SPTA1/LY6G6C/PTPN7/HLA-DPB1/CD163/HLA-DQA1/GNGT2/ADGRE1/TNF/STAC3/LRRK2/CD74/MS4A1/BCAM/RASAL3/AJAP1/JUP/HCK/FCN1/HLA-DQB1/IL2RG/CDIP1/CA4/HLA-DRB5/HLA-H/C…
GO:0045785	positive regulation of cell adhesion	124/2341	124	BP	388/17910	1.42944e-22	1.37306e-20	PDCD1LG2/CD274/IFNG/PTPRC/ICOS/CD80/CYLD/LILRB1/CLECL1/CD86/CCL5/CCR2/CXCL13/RASGRP1/IL2RA/JAK2/P2RY12/LYN/HAVCR2/LILRB2/CD28/AIF1/VCAM1/DOCK8/IL7/TNFSF13B/NCKAP1L/HLA-DMB/IL12RB1/HLA-E/EBI3/IL7R/HLA-DPA1/BTLA/IL15/TESPA1/PDCD1/CASS4/CD27/TNFSF14/IL12B/RPS3/SPTA1/VNN1/CD1D/SIRPG/APBB1IP/HLA-DPB1/VAV1/LCK/CD160/XCL1/TNF/PRKCQ/KLRK1/CCL25/CD74/LILRB4/NLRP3/RASAL3/CCDC88B/JUP/RAC3/CSF1/CARD11/CD6/SO…
GO:0002521	leukocyte differentiation	144/2341	144	BP	485/17910	1.52818e-22	1.4516e-20	THEMIS/UBD/IRF1/IFNG/PTPN22/B2M/PTPRC/RSAD2/CD80/CYLD/PTGER4/LILRB1/CD86/CCR2/RASGRP1/FCRL3/CD2/IL2RA/HLA-DOA/GAB3/IKZF3/TLR3/BATF2/TBX21/LYN/EVI2B/LILRB2/CD28/VCAM1/LAG3/RHOH/DOCK2/SLAMF6/IL27/TLR4/IL7/NCKAP1L/GPR18/IL12RB1/IL7R/IL15/TESPA1/IKZF1/PLA2G2D/DOCK11/BTK/TLR2/CD27/CD3D/CCR1/PRDM1/IL12B/PLCL2/VNN1/HCLS1/ZNF683/CD1D/CLEC4E/GPR183/VAV1/LCK/FLT3/JAG2/CCR9/TNF/C1QC/CR1/TOX/SPINK5/CSF1R/SLA…
GO:0098657	import into cell	195/2341	195	BP	751/17910	2.22863e-22	2.09368e-20	APOL1/B2M/PTPRC/FCGR3A/CLEC7A/LILRB1/CD3G/FCGR1B/CDC42SE2/LY75/SLAMF1/IL15RA/MSR1/SLC8A1/PIK3CG/LYN/BIN2/IRF8/PROM2/IL10RA/AIF1/FCGR1A/FPR2/IGKV2-29/DOCK2/TLR4/IGKV4-1/NCKAP1L/CLEC9A/IL2RB/ARHGAP25/PIK3R2/IL15/IGLV3-19/JCHAIN/IGHV3-23/TLR2/IGLV2-11/IGKV1-16/CD247/STAP1/IGHV3-13/IGKV2-30/IGHV4-39/VAV1/IGHV3-30/MRC1/IGKV2-28/IGHV3-11/CD163/IGHG1/PSTPIP1/IGLV2-14/ANKRD13B/IGHV4-59/IGKV1-17/SLC19A1/I…
GO:0006897	endocytosis	180/2341	180	BP	675/17910	4.46162e-22	4.14591e-20	APOL1/B2M/PTPRC/FCGR3A/CLEC7A/LILRB1/CD3G/FCGR1B/CDC42SE2/LY75/SLAMF1/IL15RA/MSR1/PIK3CG/LYN/BIN2/IRF8/PROM2/IL10RA/AIF1/FCGR1A/FPR2/IGKV2-29/DOCK2/TLR4/IGKV4-1/NCKAP1L/CLEC9A/IL2RB/ARHGAP25/PIK3R2/IL15/IGLV3-19/JCHAIN/IGHV3-23/TLR2/IGLV2-11/IGKV1-16/CD247/STAP1/IGHV3-13/IGKV2-30/IGHV4-39/VAV1/IGHV3-30/MRC1/IGKV2-28/IGHV3-11/CD163/IGHG1/PSTPIP1/IGLV2-14/ANKRD13B/IGHV4-59/IGKV1-17/IGHV3-33/IGKC/C2…
GO:0001819	positive regulation of cytokine production	135/2341	135	BP	446/17910	4.89878e-22	4.50319e-20	STAT1/IDO1/CD274/GBP5/DDX60/IFIH1/IRF1/IFNG/PTPN22/CRTAM/B2M/PTPRC/RSAD2/BIRC3/CD80/TIGIT/CYBB/PTGER4/LILRB1/DDX58/TLR8/CD86/ZBP1/TLR7/CCR2/RASGRP1/CD2/TLR3/JAK2/IRF8/HAVCR2/LILRB2/CD28/AIF1/HLA-F/SLAMF6/IL27/TLR4/IL7/IL12RB1/HLA-E/CLEC9A/EBI3/HLA-DPA1/IL15/CLEC6A/TLR2/TLR1/IL12B/RPS3/CD244/KIR2DL4/CLEC4E/HLA-DPB1/CD160/AIM2/C3AR1/XCL1/TNF/PRKCQ/CGAS/LRRK2/CSF1R/KLRK1/CD74/NLRP3/CCDC88B/AGPAT2/SI…
GO:0032946	positive regulation of mononuclear cell proliferation	60/2341	60	BP	126/17910	3.60968e-21	3.28289e-19	CD274/PTPRC/CLECL1/CD38/CCL5/CCR2/FCRL3/IL2RA/HAVCR2/LILRB2/CD28/AIF1/VCAM1/TLR4/IL7/TNFSF13B/NCKAP1L/HLA-DMB/IL12RB1/HLA-E/EBI3/HLA-DPA1/IL15/IL12B/RPS3/SPTA1/CD1D/HLA-DPB1/GPR183/XCL1/PRKCQ/CD74/RASAL3/CCDC88B/CSF1/CARD11/CD6/IL18/SASH3/CD3E/CORO1A/EPO/TNFSF4/WNT3A/MIF/CD4/VAV3/IL23R/LGALS9/ZAP70/CD40LG/CD209/CD24/CD70/IL1B/VTCN1/CHRNB2/LEP/IL13/CCL19
GO:0070665	positive regulation of leukocyte proliferation	62/2341	62	BP	134/17910	5.20151e-21	4.68081e-19	CD274/PTPRC/CLECL1/CD38/CCL5/CCR2/FCRL3/IL2RA/LYN/HAVCR2/LILRB2/CD28/AIF1/VCAM1/TLR4/IL7/TNFSF13B/NCKAP1L/HLA-DMB/IL12RB1/HLA-E/EBI3/HLA-DPA1/IL15/IL12B/RPS3/SPTA1/CD1D/HLA-DPB1/GPR183/XCL1/PRKCQ/CD74/RASAL3/CCDC88B/CSF1/CARD11/CD6/IL18/SASH3/CD3E/CORO1A/EPO/TNFSF4/WNT3A/MIF/CD4/VAV3/IL23R/BST2/LGALS9/ZAP70/CD40LG/CD209/CD24/CD70/IL1B/VTCN1/CHRNB2/LEP/IL13/CCL19
GO:0002366	leukocyte activation involved in immune response	179/2341	179	BP	684/17910	5.37272e-21	4.78452e-19	IFNG/B2M/PTPRC/CD80/CYBB/MNDA/PTGER4/LILRB1/CTSS/CD86/CCR2/RASGRP1/LRMP/CD84/SLAMF1/ATP8B4/TBX21/SLPI/PIK3CG/LYN/BIN2/HAVCR2/LILRB2/CD28/LYZ/HLA-F/FPR2/FLG2/DOCK2/SLAMF6/CD53/IL27/TLR4/NCKAP1L/HLA-DMB/IL12RB1/ARHGAP9/DOCK11/BTK/EEF2/KRT1/TLR2/PKP1/CLEC12A/IL12B/PLCL2/RAB3A/CD244/VNN1/ZNF683/LCP1/IMPDH2/CLEC4E/APBB1IP/GPR183/FGL2/DPP7/RAB37/PLAC8/DSP/TBC1D10C/S100A7/C3AR1/GPI/LAT2/CR1/S100P/S100A8…
GO:0030217	T cell differentiation	87/2341	87	BP	234/17910	5.64706e-21	4.97698e-19	THEMIS/IRF1/IFNG/PTPN22/B2M/PTPRC/RSAD2/CD80/CYLD/PTGER4/CD86/CCR2/RASGRP1/CD2/IL2RA/HLA-DOA/TBX21/LILRB2/CD28/LAG3/RHOH/DOCK2/SLAMF6/IL27/IL7/NCKAP1L/GPR18/IL12RB1/IL7R/IL15/TESPA1/PLA2G2D/CD27/CD3D/PRDM1/IL12B/VNN1/ZNF683/CD1D/CLEC4E/GPR183/VAV1/LCK/JAG2/CCR9/CR1/SPINK5/CD74/LILRB4/NLRP3/CARD11/SPN/SOCS1/IL18/SASH3/CLEC4D/IFNL1/NRARP/JAK3/CD3E/IL18R1/TNFSF4/LY9/PRR7/EOMES/CD4/PIK3R6/FOXJ1/BCL11…
GO:0002263	cell activation involved in immune response	179/2341	179	BP	688/17910	1.05774e-20	9.2272e-19	IFNG/B2M/PTPRC/CD80/CYBB/MNDA/PTGER4/LILRB1/CTSS/CD86/CCR2/RASGRP1/LRMP/CD84/SLAMF1/ATP8B4/TBX21/SLPI/PIK3CG/LYN/BIN2/HAVCR2/LILRB2/CD28/LYZ/HLA-F/FPR2/FLG2/DOCK2/SLAMF6/CD53/IL27/TLR4/NCKAP1L/HLA-DMB/IL12RB1/ARHGAP9/DOCK11/BTK/EEF2/KRT1/TLR2/PKP1/CLEC12A/IL12B/PLCL2/RAB3A/CD244/VNN1/ZNF683/LCP1/IMPDH2/CLEC4E/APBB1IP/GPR183/FGL2/DPP7/RAB37/PLAC8/DSP/TBC1D10C/S100A7/C3AR1/GPI/LAT2/CR1/S100P/S100A8…
GO:0050671	positive regulation of lymphocyte proliferation	59/2341	59	BP	125/17910	1.34392e-20	1.16052e-18	CD274/PTPRC/CLECL1/CD38/CCL5/CCR2/FCRL3/IL2RA/HAVCR2/LILRB2/CD28/AIF1/VCAM1/TLR4/IL7/TNFSF13B/NCKAP1L/HLA-DMB/IL12RB1/HLA-E/EBI3/HLA-DPA1/IL15/IL12B/RPS3/SPTA1/CD1D/HLA-DPB1/GPR183/XCL1/PRKCQ/CD74/RASAL3/CCDC88B/CARD11/CD6/IL18/SASH3/CD3E/CORO1A/EPO/TNFSF4/WNT3A/MIF/CD4/VAV3/IL23R/LGALS9/ZAP70/CD40LG/CD209/CD24/CD70/IL1B/VTCN1/CHRNB2/LEP/IL13/CCL19
GO:0031982	vesicle	666/2436	666	CC	3756/18675	1.58102e-20	1.60913e-18	GBP1/CD274/GBP5/LAP3/DTX3L/GCH1/B2M/PTPRC/FCGR3A/TAP1/CYBB/FASLG/MNDA/CCR5/SRGN/TLR8/CTSS/CD3G/FCGR1B/CD86/CD38/TNFSF10/TLR7/SLA/KRT17/SOD2/LY75/LRMP/MARCHF1/ERAP1/SLAMF1/HLA-B/HLA-DOA/IL15RA/TLR3/JAK2/SBSN/MSR1/ATP8B4/KRT10/SLPI/PSMB9/LYN/HLA-DRA/PRF1/BIN2/PROM2/CD48/RPL37A/HAVCR2/WARS1/LILRB2/TRIM21/SNX20/SFN/FCGR1A/LYZ/HLA-F/HLA-C/FPR2/FLG2/CD8B/VCAM1/CFB/CYTIP/AP1M2/SLA2/KRTDAP/DOCK2/SLAMF6/R…
GO:0032609	interferon-gamma production	53/2341	53	BP	105/17910	2.51957e-20	2.15398e-18	PDCD1LG2/CD274/PTPN22/BTN3A1/LILRB1/TLR8/TLR7/CCR2/ITK/RASGRP1/CD2/IL18RAP/TLR3/CD96/BTN3A2/IRF8/HAVCR2/SLAMF6/IL27/TLR4/IL12RB1/EBI3/HLA-DPA1/IL12B/CD244/HLA-DPB1/CD160/XCL1/TNF/KLRK1/SPN/IL33/LTA/IL18/SASH3/IFNL1/CD3E/IL18R1/TNFSF4/ISG15/IL20RB/TXK/EOMES/IL23R/LGALS9/IL36RN/IL10/CCR7/AXL/IL1B/KLRC4-KLRK1/GATA3/VTCN1
GO:0002274	myeloid leukocyte activation	171/2341	171	BP	652/17910	3.35428e-20	2.83918e-18	UBD/IFNG/B2M/PTPRC/CYBB/MNDA/TLR8/CTSS/CCL5/TLR7/CCR2/RASGRP1/LRMP/CD84/SLAMF1/CD2/IL18RAP/TLR3/BATF2/ATP8B4/CD226/SLPI/PIK3CG/LYN/BIN2/HAVCR2/LILRB2/AIF1/LYZ/FPR2/FLG2/RHOH/DOCK2/CD53/TLR4/NCKAP1L/ARHGAP9/IL15/BTK/EEF2/KRT1/TLR2/PKP1/TLR1/CLEC12A/RAB3A/VNN1/IMPDH2/STAP1/FGL2/DPP7/RAB37/PLAC8/LCP2/DSP/TBC1D10C/S100A7/C3AR1/GPI/TNF/LAT2/CR1/S100P/S100A8/ITGAL/LRRK2/APRT/HK3/CD74/CST7/S100A9/LILRB3…
GO:0002703	regulation of leukocyte mediated immunity	74/2341	74	BP	185/17910	3.51465e-20	2.94576e-18	SH2D1A/CRTAM/B2M/PTPRC/RSAD2/LILRB1/DDX58/CCR2/RASGRP1/CD84/IL18RAP/TLR3/TBX21/CD226/CD96/LYN/HAVCR2/CD28/HLA-F/LAG3/SLAMF6/TLR4/IL12RB1/HLA-E/IL7R/BTK/IL12B/KIR2DL4/VAV1/CD160/XCL1/TNF/CR1/KLRK1/NLRP3/SH2D1B/ARG1/LTA/IL18/SASH3/PTAFR/JAK3/TNFRSF1B/CD300A/PTPN6/IL18R1/TNFSF4/ITGB2/NCR3/NOD2/WAS/IL20RB/ITGAM/PIK3R6/FOXJ1/RAC2/IL23R/BST2/LGALS9/FCGR2B/PRAM1/FCER2/IL10/RAET1E/SERPINB9/HLA-G/RAET1G/C…
GO:0038093	Fc receptor signaling pathway	87/2341	87	BP	241/17910	5.3347e-20	4.4278e-18	PTPRC/FCGR3A/CD3G/FCGR1B/ITK/PSMB9/LYN/FCGR1A/CD200R1/IGKV2-29/IGKV4-1/NCKAP1L/PSMB8/PIK3R2/IGLV3-19/BTK/IGHV3-23/PSME2/IGLV2-11/IGKV1-16/CD247/CLEC4E/IGHV3-13/IGKV2-30/IGHV4-39/VAV1/IGHV3-30/IGKV2-28/IGHV3-11/IGHG1/LCP2/IGLV2-14/IGHV4-59/IGKV1-17/IGHV3-33/IGKC/PRKCQ/LAT2/IGKV5-2/IGLV1-51/IGKV1-39/IGHV1-69/IGLV2-8/IGHV3-48/IGLV2-23/IGKV1D-39/PSMB10/IGLV1-40/IGKV3-20/HCK/IGLV3-25/CARD11/IGKV3-15/I…
GO:0032940	secretion by cell	309/2341	309	BP	1449/17910	5.88615e-20	4.83853e-18	GBP1/CD274/GBP5/IFIH1/IFNG/PTPN22/CRTAM/B2M/PTPRC/BTN3A1/RSAD2/CCL8/CYBB/MNDA/SRGN/PTGER4/LILRB1/DDX58/TLR8/GRIN3A/CLECL1/CTSS/CD38/CCL5/PLEK/LAX1/CCR2/RASGRP1/LRMP/CD84/CD2/JAK2/ATP8B4/P2RY12/SLPI/PIK3CG/LYN/BIN2/BTN3A2/TLR10/HAVCR2/NLRC4/LILRB2/AIF1/LYZ/HLA-F/CD200R1/FPR2/FLG2/DOCK2/CD53/TLR4/TNFSF13B/NCKAP1L/HLA-E/CLEC9A/ARHGAP9/CLEC6A/BTK/CTSW/EEF2/KRT1/TLR2/PKP1/ABCA12/TLR1/CLEC12A/CCR1/BANK…
GO:0046903	secretion	331/2341	331	BP	1584/17910	6.41011e-20	5.21905e-18	GBP1/CD274/GBP5/IFIH1/IFNG/PTPN22/CRTAM/B2M/PTPRC/BTN3A1/RSAD2/CCL8/CYBB/MNDA/SRGN/PTGER4/LILRB1/DDX58/TLR8/GRIN3A/CLECL1/CTSS/CD38/CCL5/PLEK/LAX1/CCR2/RASGRP1/LRMP/CD84/CD2/JAK2/ATP8B4/OAS2/P2RY12/SLPI/PIK3CG/LYN/BIN2/BTN3A2/TLR10/HAVCR2/NLRC4/LILRB2/AIF1/LYZ/HLA-F/CD200R1/ALOX12B/FPR2/FLG2/DOCK2/CD53/TLR4/TNFSF13B/NCKAP1L/HLA-E/CLEC9A/ARHGAP9/PLA2G2D/CLEC6A/BTK/CTSW/EEF2/KRT1/TLR2/PKP1/ABCA12/T…
GO:0042102	positive regulation of T cell proliferation	48/2341	48	BP	90/17910	7.56646e-20	6.10242e-18	CD274/PTPRC/CLECL1/CCL5/CCR2/IL2RA/HAVCR2/LILRB2/CD28/AIF1/VCAM1/TNFSF13B/NCKAP1L/HLA-DMB/IL12RB1/HLA-E/EBI3/HLA-DPA1/IL15/IL12B/RPS3/SPTA1/CD1D/HLA-DPB1/XCL1/PRKCQ/RASAL3/CCDC88B/CARD11/CD6/IL18/SASH3/CD3E/CORO1A/EPO/TNFSF4/CD4/IL23R/LGALS9/ZAP70/CD40LG/CD209/CD24/CD70/IL1B/VTCN1/LEP/CCL19
GO:0045088	regulation of innate immune response	129/2341	129	BP	440/17910	8.70707e-20	6.95671e-18	STAT1/PARP14/GBP5/DDX60/IFIH1/SH2D1A/IRF1/PARP9/IFNG/PTPN22/CRTAM/RSAD2/TNIP3/BIRC3/PYHIN1/CYLD/MNDA/NMI/NLRC5/CLEC7A/LILRB1/DDX58/TLR8/CTSS/SAMHD1/CCL5/TLR7/ACOD1/NLRC3/RASGRP1/ERAP1/FCRL3/IL18RAP/TLR3/JAK2/CD226/PIK3AP1/CD96/PSMB9/LYN/TLR10/HAVCR2/NLRC4/HLA-F/FPR2/LAG3/SLAMF6/TLR4/HLA-E/PSMB8/S100A14/UBA52/CLEC6A/BTK/PSME2/RPS19/TLR2/CLEC4A/TLR1/TIFA/IL12B/KIR2DL4/CD1D/CLEC4E/VAV1/CD160/AIM2/CG…
GO:0030155	regulation of cell adhesion	171/2341	171	BP	659/17910	1.0952e-19	8.66934e-18	GBP1/PDCD1LG2/IDO1/CD274/IRF1/IFNG/PTPN22/PTPRC/ICOS/CD80/TIGIT/CYLD/LILRB1/CLECL1/CD86/CCL5/LAX1/CCR2/CXCL13/RASGRP1/IL2RA/JAK2/TBX21/P2RY12/PIK3CG/LYN/HAVCR2/ADAMDEC1/LILRB2/CD28/AIF1/VCAM1/LAG3/CYTIP/DOCK8/IL7/TNFSF13B/NCKAP1L/HLA-DMB/IL12RB1/HLA-E/EBI3/IL7R/HLA-DPA1/BTLA/IL15/TESPA1/PDCD1/CASS4/CD27/SEMA4D/ARHGDIG/TNFSF14/IL12B/RPS3/SPTA1/VNN1/CD1D/TACSTD2/SIRPG/CAMSAP3/APBB1IP/HLA-DPB1/VAV1/…
GO:0034341	response to interferon-gamma	70/2341	70	BP	173/17910	1.71571e-19	1.34565e-17	GBP1/STAT1/PARP14/GBP5/GBP4/UBD/TRIM22/IRF1/PARP9/GCH1/IFNG/B2M/GBP2/NMI/NLRC5/FCGR1B/CCL5/CIITA/ACOD1/HLA-B/TLR3/JAK2/SP100/OAS2/HLA-DRA/IRF8/OAS1/TRIM21/AIF1/FCGR1A/HLA-F/HLA-C/VCAM1/TLR4/IL12RB1/HLA-E/HLA-DPA1/IRF9/TLR2/HLA-DRB1/TRIM34/OASL/IL12B/IFITM1/HLA-DQA2/HLA-DPB1/MRC1/HLA-DQA1/OAS3/HCK/ARG1/HLA-DQB1/SOCS1/CCL2/HLA-DRB5/HLA-H/PTAFR/IFI30/CCL3/MEFV/WAS/TXK/IL23R/HLA-DQB2/BST2/LGALS9/IRF6…
GO:0031341	regulation of cell killing	45/2341	45	BP	82/17910	2.37231e-19	1.84372e-17	SH2D1A/IFNG/CRTAM/B2M/PTPRC/LILRB1/RASGRP1/IL18RAP/CD226/CR1L/PRF1/HAVCR2/HLA-F/LAG3/SLAMF6/IL12RB1/HLA-E/IL7R/IL12B/KIR2DL4/STAP1/VAV1/CD160/XCL1/KRT6A/KLRK1/CD5L/ARG1/TYROBP/PGLYRP4/NCR3/ITGAM/PIK3R6/IL23R/LGALS9/FCGR2B/FCER2/RAET1E/SERPINB9/HLA-G/NOS2/NCR1/KLRC4-KLRK1/LEP/IL13
GO:0006898	receptor-mediated endocytosis	99/2341	99	BP	301/17910	3.05121e-19	2.34998e-17	APOL1/B2M/LILRB1/FCGR1B/MSR1/FCGR1A/FPR2/IGKV2-29/IGKV4-1/CLEC9A/IGLV3-19/JCHAIN/IGHV3-23/IGLV2-11/IGKV1-16/IGHV3-13/IGKV2-30/IGHV4-39/IGHV3-30/MRC1/IGKV2-28/IGHV3-11/CD163/IGLV2-14/ANKRD13B/IGHV4-59/IGKV1-17/IGHV3-33/IGKC/IGKV5-2/IGLV1-51/NECAB2/IGKV1-39/IGHV1-69/IGLV2-8/IGHV3-48/IGLV2-23/IGKV1D-39/IGLV1-40/IGKV3-20/IGLV3-25/IGKV3-15/IGKV3D-20/IGLV1-47/IGKV1-5/SFTPD/IGHV4-34/ITGB2/WNT3A/IGLV3-21…
GO:0071346	cellular response to interferon-gamma	64/2341	64	BP	153/17910	8.00581e-19	6.11086e-17	GBP1/STAT1/PARP14/GBP5/GBP4/TRIM22/IRF1/PARP9/IFNG/B2M/GBP2/NMI/NLRC5/FCGR1B/CCL5/CIITA/ACOD1/HLA-B/TLR3/JAK2/SP100/OAS2/HLA-DRA/IRF8/OAS1/TRIM21/AIF1/FCGR1A/HLA-F/HLA-C/VCAM1/TLR4/IL12RB1/HLA-E/HLA-DPA1/IRF9/TLR2/HLA-DRB1/TRIM34/OASL/IL12B/HLA-DQA2/HLA-DPB1/MRC1/HLA-DQA1/OAS3/HCK/ARG1/HLA-DQB1/SOCS1/CCL2/HLA-DRB5/HLA-H/PTAFR/IFI30/CCL3/WAS/TXK/HLA-DQB2/LGALS9/IRF6/ASS1/HLA-G/NOS2
GO:0050851	antigen receptor-mediated signaling pathway	81/2341	81	BP	224/17910	9.19055e-19	6.9531e-17	GBP1/THEMIS/PTPN22/TRAT1/PTPRC/BTN3A1/FYB1/CYLD/MNDA/CD3G/CD38/LAX1/ITK/FCRL3/CD226/PSMB9/LYN/HLA-DRA/SLA2/NCKAP1L/HLA-DPA1/PSMB8/PIK3R2/TESPA1/BTK/PSME2/HLA-DRB1/CD3D/TRAV19/PLCL2/HLA-DQA2/CD247/RPS3/STAP1/HLA-DPB1/KLHL6/LCK/CD160/LCP2/HLA-DQA1/TRAV29DV5/PRKCQ/LAT2/TRAC/LILRB4/MS4A1/TRBC1/INPP5D/PSMB10/PRKCH/HLA-DQB1/CARD11/HLA-DRB5/PRKCB/TRBV7-9/TRBV12-3/CD3E/CD300A/PTPN6/DENND1B/TRAV8-4/WAS/TX…
GO:0051604	protein maturation	109/2341	109	BP	353/17910	1.00371e-18	7.52692e-17	SRGN/CTSS/CR1L/IGKV2-29/CFB/ASPRV1/IGKV4-1/IGLV3-19/IGHV3-23/IGLV2-11/IGKV1-16/IGHV3-13/IGKV2-30/IGHV4-39/IGHV3-30/IGKV2-28/IGHV3-11/IGHG1/IGLV2-14/IGHV4-59/IGKV1-17/C3AR1/IGHV3-33/C1S/IGKC/F12/C2/C1QC/CR1/IGKV5-2/LRRK2/IGLV1-51/KLK13/IGKV1-39/CST7/IGHV1-69/CD5L/IGLV2-8/IGHV3-48/IGLV2-23/IGKV1D-39/ECE2/IGLV1-40/IGKV3-20/C1QB/IGLV3-25/NLRP7/IGKV3-15/IGKV3D-20/IGLV1-47/LGMN/LHB/C1QA/ANGPTL8/VSIG4/S…
GO:0060333	interferon-gamma-mediated signaling pathway	47/2341	47	BP	91/17910	1.04057e-18	7.73554e-17	GBP1/STAT1/PARP14/TRIM22/IRF1/PARP9/IFNG/B2M/GBP2/NMI/NLRC5/FCGR1B/CIITA/HLA-B/JAK2/SP100/OAS2/HLA-DRA/IRF8/OAS1/TRIM21/FCGR1A/HLA-F/HLA-C/VCAM1/HLA-E/HLA-DPA1/IRF9/HLA-DRB1/TRIM34/OASL/HLA-DQA2/HLA-DPB1/HLA-DQA1/OAS3/HCK/ARG1/HLA-DQB1/SOCS1/HLA-DRB5/HLA-H/PTAFR/IFI30/TXK/HLA-DQB2/IRF6/HLA-G
GO:0098542	defense response to other organism	134/2341	134	BP	481/17910	2.09696e-18	1.53799e-16	GBP1/STAT1/CXCL10/IFI44L/DDX60/IFIH1/TRIM22/DTX3L/IRF1/PARP9/CXCL9/IFNG/PTPRC/RSAD2/GBP3/BIRC3/NLRC5/CLEC7A/LILRB1/DDX58/TLR8/SAMHD1/TLR7/CXCL13/IFIT5/IL2RA/TLR3/BATF2/APOBEC3G/OAS2/SLPI/IFIT1/PRF1/TNFSF8/IRF8/HAVCR2/NLRC4/OAS1/LYZ/FPR2/IL27/TLR4/IL12RB1/HLA-E/S100A14/MPEG1/IL15/IRF9/CLEC6A/JCHAIN/RPS19/TLR2/TRIM34/OASL/SIGLEC11/IL12B/APOBEC3D/KLK5/CLEC4E/FGL2/SLFN11/PLAC8/CD160/AIM2/S100A7/OAS3/…
GO:0031349	positive regulation of defense response	140/2341	140	BP	512/17910	2.10486e-18	1.53799e-16	IDO1/GBP5/DDX60/IFIH1/SH2D1A/IRF1/PARP9/PTPN22/CRTAM/RSAD2/TNIP3/BIRC3/PYHIN1/CYLD/MNDA/NLRC5/CLEC7A/PTGER4/DDX58/TLR8/CTSS/CCL5/TLR7/ACOD1/CCR2/RASGRP1/FCRL3/IL18RAP/TLR3/JAK2/CD226/PIK3CG/PIK3AP1/PSMB9/LYN/TLR10/HAVCR2/NLRC4/CD28/HLA-F/FPR2/LAG3/SLAMF6/TLR4/HLA-E/PSMB8/S100A14/UBA52/IL15/CLEC6A/BTK/PSME2/RPS19/TLR2/CLEC4A/TLR1/TIFA/IL12B/KIR2DL4/CD1D/KLK5/STAP1/CLEC4E/VAV1/CD160/AIM2/F12/TNF/CG…
GO:0002706	regulation of lymphocyte mediated immunity	59/2341	59	BP	136/17910	2.23261e-18	1.61751e-16	SH2D1A/CRTAM/B2M/PTPRC/RSAD2/LILRB1/CCR2/RASGRP1/IL18RAP/TBX21/CD226/CD96/HAVCR2/CD28/HLA-F/LAG3/SLAMF6/IL12RB1/HLA-E/IL7R/BTK/IL12B/KIR2DL4/VAV1/CD160/XCL1/TNF/CR1/KLRK1/NLRP3/SH2D1B/ARG1/LTA/IL18/SASH3/TNFRSF1B/PTPN6/IL18R1/TNFSF4/NCR3/WAS/IL20RB/PIK3R6/FOXJ1/IL23R/LGALS9/FCGR2B/FCER2/IL10/RAET1E/SERPINB9/HLA-G/RAET1G/C3/IL1B/NCR1/KLRC4-KLRK1/GATA3/LEP
GO:0002237	response to molecule of bacterial origin	99/2341	99	BP	309/17910	2.39487e-18	1.72048e-16	CXCL10/IDO1/GCH1/PTPN22/B2M/TNIP3/FASLG/CCR5/PTGER4/LILRB1/CCL5/ACOD1/JAK2/SLPI/CD96/LYN/IRF8/NUGGC/HAVCR2/CSF2RB/LILRB2/IL10RA/CMPK2/VCAM1/TLR4/S100A14/TLR2/TLR1/IL12B/STAP1/MRC1/PTGER2/S100A7/TNF/S100A8/KLRK1/NLRP3/KMO/PPARD/HCK/ARG1/NLRP7/CD6/TICAM2/TLR6/CCL2/LTA/IL18/CD180/LY86/PTAFR/TNFRSF1B/EPO/TNFSF4/IRAK2/AICDA/MGST1/APOB/GSTP1/MIF/NOD2/CCL3/CARD17/PLCG2/GFI1/PTGFR/LILRA2/PCK1/C4B/IL23R/L…
GO:0001906	cell killing	64/2341	64	BP	156/17910	2.64352e-18	1.88328e-16	SH2D1A/APOL1/IFNG/CRTAM/B2M/PTPRC/LILRB1/RASGRP1/IL18RAP/CD226/CR1L/PRF1/HAVCR2/LYZ/HLA-F/LAG3/SLAMF6/IL12RB1/HLA-E/IL7R/RPS19/GZMB/IL12B/KIR2DL4/STAP1/VAV1/TSTA3/CD160/XCL1/KRT6A/KLRK1/CD5L/SLAMF7/ARG1/IL18/PTPN6/CORO1A/TYROBP/PGLYRP4/NCR3/ITGAM/PIK3R6/S100A12/IL23R/LGALS9/FCGR2B/FCER2/RAET1E/SERPINB9/HLA-G/RAET1G/C3/NOS2/HAMP/NCR1/KLRC4-KLRK1/PF4/KIR3DL1/GNLY/LEP/IL13/CTSG/F2/MBL2
GO:0038095	Fc-epsilon receptor signaling pathway	67/2341	67	BP	169/17910	3.6928e-18	2.60907e-16	ITK/PSMB9/LYN/IGKV2-29/IGKV4-1/PSMB8/PIK3R2/IGLV3-19/BTK/IGHV3-23/PSME2/IGLV2-11/IGKV1-16/IGHV3-13/IGKV2-30/IGHV4-39/VAV1/IGHV3-30/IGKV2-28/IGHV3-11/LCP2/IGLV2-14/IGHV4-59/IGKV1-17/IGHV3-33/IGKC/PRKCQ/LAT2/IGKV5-2/IGLV1-51/IGKV1-39/IGHV1-69/IGLV2-8/IGHV3-48/IGLV2-23/IGKV1D-39/PSMB10/IGLV1-40/IGKV3-20/IGLV3-25/CARD11/IGKV3-15/IGKV3D-20/IGLV1-47/IGKV1-5/IGHV4-34/IGLV3-21/IGHV2-5/IGLC2/IGKV1-12/IGHV…
GO:0001909	leukocyte mediated cytotoxicity	48/2341	48	BP	97/17910	4.41961e-18	3.09698e-16	SH2D1A/CRTAM/B2M/PTPRC/LILRB1/RASGRP1/IL18RAP/CD226/PRF1/HAVCR2/HLA-F/LAG3/SLAMF6/IL12RB1/HLA-E/IL7R/GZMB/IL12B/KIR2DL4/STAP1/VAV1/TSTA3/CD160/XCL1/KLRK1/SLAMF7/ARG1/IL18/PTPN6/CORO1A/TYROBP/NCR3/ITGAM/PIK3R6/IL23R/LGALS9/FCGR2B/RAET1E/SERPINB9/HLA-G/RAET1G/NOS2/NCR1/KLRC4-KLRK1/KIR3DL1/LEP/CTSG/F2
GO:0016477	cell migration	306/2341	306	BP	1474/17910	5.60735e-18	3.89734e-16	CXCL10/CXCL11/CD274/PARP9/IFNG/PTPRC/CCL8/CCR5/PTGER4/DDX58/CCL5/SOD2/CCL4/CCR2/CXCL13/CD84/CD2/JAK2/SP100/SLC8A1/TBX21/P2RY12/PIK3CG/LYN/BIN2/CD48/NSMF/S100A2/AIF1/CD200R1/FPR2/IGKV2-29/VCAM1/DOCK8/IGKV4-1/NCKAP1L/GPR18/BSG/EPPK1/S100A14/RAB25/PIK3R2/GCNT1/PSTPIP2/IGLV3-19/CASS4/JCHAIN/IGHV3-23/RPS19/KRT2/CCR4/SEMA4D/CCR1/TNFSF14/IL12B/IGLV2-11/IFITM1/IGKV1-16/CD244/KRT16/LCP1/TACSTD2/SIRPG/STAP…
GO:0009897	external side of plasma membrane	74/2436	74	CC	199/18675	4.37446e-18	4.007e-16	CXCL10/CXCL9/B2M/PTPRC/KLRD1/FCGR3A/ICOS/TNFRSF9/FASLG/CD69/CCR5/LILRB1/TLR8/CD8A/CD2/IL2RA/FCRL6/P2RY12/CD28/VCAM1/LAG3/TLR4/IL7R/IL2RB/PDCD1/CCR1/CD244/LY6G6C/CD163/ADGRE1/TNF/CD74/MS4A1/BCAM/FCN1/IL2RG/CA4/CD33/CD3E/ITGB2/RTN4R/CD5/F10/ITGAM/CD4/ANTXR2/TFR2/SDC1/SCNN1G/FCGR2B/RTN4RL2/CD40LG/P2RX1/CD209/SLC2A4/CD19/ITGB6/CD79A/GP1BA/PCSK9/FCER2/KIT/CDH13/CTLA4/VTCN1/ASTN1/SCNN1B/CEACAM5/LRP2/CH…
GO:0005102	signaling receptor binding	289/2173	289	MF	1386/16967	1.3471e-18	9.78671e-16	STAT1/CXCL10/CXCL11/AKAP5/CXCL9/IFNG/CRTAM/TRAT1/PTPRC/KLRD1/TAP1/TIGIT/FYB1/FASLG/CLEC7A/JAKMIP1/LILRB1/CD3G/TNFSF10/CCL5/CD8A/KRT17/CCL4/CCR2/CXCL13/MARCHF1/ERAP1/CD72/CD2/JAK2/FCRL6/CD226/PIK3CG/LYN/APOL2/TNFSF8/TRGV9/EFNA3/LILRB2/FPR2/CD8B/VCAM1/LAG3/DOCK2/IL27/TLR4/IL7/TNFSF13B/IL12RB1/HLA-E/EBI3/S100A14/PIK3R2/IL15/TAP2/TESPA1/JCHAIN/TLR2/DDO/ABCA12/TLR1/TRAV19/OASL/SEMA4D/TNFSF14/BANK1/IL1…
GO:0002683	negative regulation of immune system process	126/2341	126	BP	451/17910	1.75637e-17	1.2109e-15	GBP1/PARP14/PDCD1LG2/IDO1/CD274/IRF1/PTPN22/GPR171/SAMSN1/PTPRC/TIGIT/MNDA/NMI/NLRC5/PTGER4/LILRB1/SAMHD1/LAX1/ACOD1/NLRC3/CCR2/FCRL3/CD84/IL2RA/HLA-DOA/TLR3/TBX21/CD96/LYN/HAVCR2/LILRB2/HLA-F/CD200R1/LAG3/SLA2/TLR4/GPR18/HLA-E/IL7R/PDCD1/BTK/RPS19/BANK1/IL12B/PLCL2/GAL/KIR2DL4/STAP1/FGL2/HLA-DOB/CD160/XCL1/MAD1L1/TNF/C1QC/CR1/SPINK5/KLRK1/CCL25/SLAMF8/CD74/CST7/LILRB4/INPP5D/LILRB3/LST1/ARG1/SPN…
GO:0050663	cytokine secretion	80/2341	80	BP	230/17910	2.13541e-17	1.46045e-15	GBP1/CD274/GBP5/IFIH1/PTPN22/CRTAM/BTN3A1/SRGN/PTGER4/LILRB1/DDX58/TLR8/CLECL1/RASGRP1/CD2/LYN/BTN3A2/TLR10/HAVCR2/NLRC4/AIF1/CD200R1/TLR4/CLEC9A/CLEC6A/TLR2/TLR1/BANK1/CD244/CLEC4E/FFAR4/CD160/LCP2/AIM2/TNF/TMSB4X/LRRK2/CSF1R/NLRP3/FCN1/PAEP/CARD11/NLRP7/SOCS1/IL33/TLR6/TNFRSF1B/FERMT1/MIF/NOD2/CCL3/ISG15/CARD17/IL26/GHRL/LILRA2/S100A12/LGALS9/FCGR2B/APOA1/LILRA5/ITGB6/IL36RN/CLEC5A/IL10/CCR7/NO…
GO:0032649	regulation of interferon-gamma production	46/2341	46	BP	93/17910	2.24e-17	1.51982e-15	PDCD1LG2/CD274/PTPN22/LILRB1/TLR8/TLR7/CCR2/RASGRP1/CD2/TLR3/CD96/IRF8/HAVCR2/SLAMF6/IL27/TLR4/IL12RB1/EBI3/HLA-DPA1/IL12B/CD244/HLA-DPB1/CD160/XCL1/TNF/KLRK1/IL33/LTA/IL18/SASH3/IFNL1/CD3E/IL18R1/TNFSF4/ISG15/IL20RB/TXK/IL23R/LGALS9/IL36RN/IL10/CCR7/AXL/IL1B/KLRC4-KLRK1/GATA3
GO:0001910	regulation of leukocyte mediated cytotoxicity	37/2341	37	BP	64/17910	3.55947e-17	2.39605e-15	SH2D1A/CRTAM/B2M/PTPRC/LILRB1/RASGRP1/IL18RAP/CD226/HAVCR2/HLA-F/LAG3/SLAMF6/IL12RB1/HLA-E/IL7R/IL12B/KIR2DL4/STAP1/VAV1/CD160/XCL1/KLRK1/ARG1/TYROBP/NCR3/ITGAM/PIK3R6/IL23R/LGALS9/FCGR2B/RAET1E/SERPINB9/HLA-G/NOS2/NCR1/KLRC4-KLRK1/LEP
GO:0038023	signaling receptor activity	280/2173	280	MF	1344/16967	5.75621e-18	2.78793e-15	GPR171/GPR65/PTPRC/OR2I1P/KLRD1/CD80/TNFRSF9/CD69/CCR5/CLEC7A/P2RY10/PTGER4/LILRB1/TLR8/GRIN3A/CD3G/FCGR1B/CD86/TRGC2/CYSLTR1/CD8A/TLR7/KRT17/CCR2/LY75/CD72/GPR174/SLAMF1/CCR8/CD2/IL2RA/HLA-DOA/IL18RAP/IL15RA/IGSF6/TLR3/KLRC1/P2RY12/HLA-DRA/CXCR6/TLR10/CD48/EFNA3/CSF2RB/P2RY14/LILRB2/GPR82/IL10RA/CD28/CD200R1/FPR2/CD8B/LAG3/GPR31/TLR4/GPR18/IL12RB1/EBI3/IL7R/IL2RB/HLA-DPA1/BTLA/TNFRSF17/KRT1/TLR2…
GO:0098797	plasma membrane protein complex	125/2436	125	CC	451/18675	4.18568e-17	3.48553e-15	TRAT1/B2M/CYBB/GRIN3A/CD3G/CD8A/HLA-B/IL2RA/HLA-DOA/IL18RAP/LYN/HLA-DRA/CSF2RB/HLA-F/HLA-C/CD8B/VCAM1/HLA-DMB/IL12RB1/HLA-E/IL2RB/HLA-DPA1/TLR2/HLA-DRB1/TLR1/CD3D/ITGAD/HLA-DQA2/CD247/GJB5/APBB1IP/HLA-DPB1/HLA-DOB/HLA-DQA1/CASP10/GNGT2/STAC3/ITGAL/CD74/FAS/LRP5/ATP12A/JUP/HLA-DQB1/HLA-DMA/CD6/SCN5A/HLA-DRB5/CNIH2/HLA-H/SHANK1/IFNL1/CD3E/PTPN6/IL18R1/NOXA1/ITGB2/GJB4/KCNE1/WNT3A/NCF2/NCF4/OLFM2/KC…
GO:0002699	positive regulation of immune effector process	72/2341	72	BP	198/17910	5.55864e-17	3.71256e-15	DDX60/SH2D1A/IFNG/CRTAM/B2M/PTPRC/RSAD2/CD80/LILRB1/DDX58/CD86/CCR2/RASGRP1/CD84/IL18RAP/TBX21/CD226/LYN/CD28/HLA-F/LAG3/SLAMF6/TLR4/HLA-DMB/IL12RB1/HLA-E/BTK/RPS19/IL12B/CD244/KIR2DL4/KLK5/VAV1/CD160/XCL1/GPI/TNF/MZB1/KLRK1/CD74/NLRP3/SH2D1B/ARG1/KLK7/IL33/LTA/DHX58/IL18/SASH3/PTAFR/CD300A/IL18R1/TNFSF4/ITGB2/NCR3/MIF/NOD2/ITGAM/RAC2/IL23R/LGALS9/FCER2/RAET1E/HLA-G/RAET1G/C3/IL1B/KLRC4-KLRK1/GAT…
GO:0048870	cell motility	323/2341	323	BP	1611/17910	1.18575e-16	7.79769e-15	CXCL10/CXCL11/CD274/PARP9/IFNG/PTPRC/CCL8/CCR5/PTGER4/DDX58/CCL5/SOD2/CCL4/CCR2/CXCL13/CD84/CD2/JAK2/SP100/SLC8A1/TBX21/P2RY12/PIK3CG/LYN/BIN2/CD48/NSMF/S100A2/AIF1/CD200R1/FPR2/IGKV2-29/VCAM1/DOCK8/IGKV4-1/NCKAP1L/GPR18/BSG/EPPK1/S100A14/RAB25/PIK3R2/GCNT1/PSTPIP2/IGLV3-19/CASS4/JCHAIN/IGHV3-23/RPS19/KRT2/CCR4/SEMA4D/CCR1/TNFSF14/IL12B/IGLV2-11/IFITM1/ARHGAP18/IGKV1-16/CD244/KRT16/LCP1/TACSTD2/S…
GO:0051674	localization of cell	323/2341	323	BP	1611/17910	1.18575e-16	7.79769e-15	CXCL10/CXCL11/CD274/PARP9/IFNG/PTPRC/CCL8/CCR5/PTGER4/DDX58/CCL5/SOD2/CCL4/CCR2/CXCL13/CD84/CD2/JAK2/SP100/SLC8A1/TBX21/P2RY12/PIK3CG/LYN/BIN2/CD48/NSMF/S100A2/AIF1/CD200R1/FPR2/IGKV2-29/VCAM1/DOCK8/IGKV4-1/NCKAP1L/GPR18/BSG/EPPK1/S100A14/RAB25/PIK3R2/GCNT1/PSTPIP2/IGLV3-19/CASS4/JCHAIN/IGHV3-23/RPS19/KRT2/CCR4/SEMA4D/CCR1/TNFSF14/IL12B/IGLV2-11/IFITM1/ARHGAP18/IGKV1-16/CD244/KRT16/LCP1/TACSTD2/S…
GO:0030595	leukocyte chemotaxis	69/2341	69	BP	188/17910	1.4211e-16	9.274e-15	CXCL10/CXCL11/CCR5/CCL5/CCL4/CCR2/CXCL13/PIK3CG/LYN/AIF1/FPR2/NCKAP1L/GPR18/S100A14/RPS19/CCR1/TNFSF14/STAP1/GPR183/VAV1/S100A7/C3AR1/CXCR3/XCL1/CMKLR1/S100A8/KLRK1/SLAMF8/CD74/S100A9/JAML/CSF1/CCL2/CCL7/LGMN/CORO1A/SFTPD/ITGB2/PTPRO/MIF/CCL3/VAV3/S100A12/RAC2/EDN3/CCR6/LGALS9/F7/CXCL12/CXCR4/TNFSF11/ADAM8/CXCR2/EDN2/RIPOR2/KIT/IL10/CNR2/CCR7/PLA2G7/CXCR1/KLRC4-KLRK1/CCL1/PF4/CYP19A1/CXCR5/SAA1/C…
GO:0051240	positive regulation of multicellular organismal process	344/2341	344	BP	1750/17910	2.15403e-16	1.39506e-14	STAT1/IDO1/CD274/GBP5/DDX60/IFIH1/IRF1/GCH1/IFNG/PTPN22/CRTAM/B2M/PTPRC/RSAD2/BIRC3/CD80/TIGIT/CYBB/CYLD/PTGER4/LILRB1/DDX58/TLR8/CD86/CD38/ZBP1/PLEK/TLR7/KRT17/SOD2/CCR2/RASGRP1/ERAP1/CD2/IL2RA/TLR3/JAK2/SMTNL1/SLC8A1/TBX21/P2RY12/LYN/EVI2B/IRF8/HAVCR2/NSMF/NEUROG3/LILRB2/CD28/AIF1/HLA-F/ALOX12B/SLAMF6/IL27/TLR4/IL7/NCKAP1L/IL12RB1/HLA-E/CLEC9A/EBI3/IL7R/HLA-DPA1/RAB25/IL15/TESPA1/CLEC6A/CPEB3/B…
GO:0051704	multi-organism process	459/2341	459	BP	2496/17910	2.20595e-16	1.41795e-14	GBP1/STAT1/CXCL10/IDO1/GBP5/IFI44L/DDX60/IFIH1/TRIM22/DTX3L/APOL1/IRF1/PARP9/CXCL9/GCH1/IFNG/PTPN22/IFIT3/B2M/IFIT2/PTPRC/RSAD2/GBP3/TNIP3/BIRC3/CCL8/TAP1/CD80/FASLG/CCR5/NLRC5/CLEC7A/PTGER4/LILRB1/DDX58/TLR8/SP110/SAMHD1/CD86/CD38/CCL5/TLR7/ACOD1/IFI44/CCL4/CCR2/CXCL13/LRMP/ERAP1/IFIT5/SLAMF1/ADAM28/IL2RA/GZMA/IKZF3/TLR3/BATF2/JAK2/SP100/HERC6/APOBEC3G/TBX21/OAS2/SLPI/CD96/PSMB9/LYN/HLA-DRA/IFIT…
GO:0005125	cytokine activity	61/2173	61	MF	154/16967	4.49332e-17	1.6322e-14	CXCL10/CXCL11/CXCL9/FASLG/TNFSF10/CCL5/CCL4/CXCL13/TNFSF8/IL27/IL7/TNFSF13B/EBI3/IL15/TNFSF14/IL12B/XCL1/GPI/TNF/SECTM1/CCL25/IL32/CSF1/IL33/CRLF1/LTA/CCL7/IL18/IFNL1/TNFSF18/EPO/TNFSF4/TNFSF15/MIF/CCL3/IL26/IL36G/CXCL12/CD40LG/TNFSF11/IL37/CD70/IL36RN/FAM3B/IL10/WNT1/IL1B/TSLP/LTB/CCL1/PF4/LIF/SCGB3A1/WNT7A/TAFA5/VSTM1/IL13/IL36B/CXCL14/CCL19/IL20
GO:0032496	response to lipopolysaccharide	92/2341	92	BP	295/17910	2.62669e-16	1.67579e-14	CXCL10/IDO1/GCH1/PTPN22/TNIP3/FASLG/CCR5/PTGER4/LILRB1/CCL5/ACOD1/JAK2/SLPI/CD96/LYN/IRF8/NUGGC/HAVCR2/CSF2RB/LILRB2/IL10RA/CMPK2/VCAM1/TLR4/S100A14/TLR2/IL12B/STAP1/MRC1/PTGER2/S100A7/TNF/S100A8/KLRK1/NLRP3/KMO/PPARD/HCK/ARG1/NLRP7/CD6/TICAM2/CCL2/LTA/IL18/CD180/LY86/PTAFR/TNFRSF1B/EPO/TNFSF4/IRAK2/AICDA/MGST1/APOB/GSTP1/MIF/NOD2/CCL3/CARD17/PLCG2/GFI1/PTGFR/LILRA2/PCK1/IL23R/LGALS9/NOS3/FGFR2/P…
GO:0040011	locomotion	355/2341	355	BP	1835/17910	7.78237e-16	4.92826e-14	CXCL10/CXCL11/CD274/PARP9/CXCL9/IFNG/PTPRC/CCL8/CCR5/PTGER4/DDX58/CYSLTR1/CCL5/SOD2/CCL4/CCR2/CXCL13/CD84/CD2/JAK2/SP100/SLC8A1/TBX21/P2RY12/PIK3CG/LYN/BIN2/CD48/NSMF/TRIM21/S100A2/AIF1/CD200R1/FPR2/IGKV2-29/VCAM1/DOCK2/DOCK8/IGKV4-1/NCKAP1L/GPR18/BSG/EPPK1/S100A14/RAB25/PIK3R2/GCNT1/PSTPIP2/IGLV3-19/CASS4/JCHAIN/IGHV3-23/RPS19/KRT2/FPR3/CCR4/SEMA4D/CCR1/TNFSF14/NECTIN1/IL12B/IGLV2-11/IFITM1/ARHG…
GO:0031343	positive regulation of cell killing	31/2341	31	BP	50/17910	8.14083e-16	5.11735e-14	SH2D1A/IFNG/CRTAM/B2M/PTPRC/RASGRP1/IL18RAP/CD226/PRF1/HLA-F/LAG3/SLAMF6/IL12RB1/HLA-E/IL12B/STAP1/VAV1/CD160/XCL1/KLRK1/CD5L/ARG1/TYROBP/PGLYRP4/NCR3/ITGAM/IL23R/FCER2/RAET1E/NOS2/KLRC4-KLRK1
GO:0042287	MHC protein binding	27/2173	27	MF	38/16967	1.98705e-16	5.77436e-14	KLRD1/TAP1/CLEC7A/LILRB1/CD8A/KRT17/MARCHF1/FCRL6/TRGV9/LILRB2/CD8B/LAG3/HLA-E/TAP2/TRAV19/CD244/TRAV29DV5/KLRK1/CD74/TRBV7-9/TRBV12-3/TRGV3/TRAV8-4/CD4/KLRC4-KLRK1/KIR3DL2/KIR2DS4
GO:0032103	positive regulation of response to external stimulus	95/2341	95	BP	315/17910	9.40182e-16	5.86687e-14	CXCL10/IDO1/GBP5/DDX60/PTGER4/CCL5/TLR7/ACOD1/CCL4/CCR2/CXCL13/TLR3/JAK2/P2RY12/PIK3CG/TLR10/HAVCR2/CD28/AIF1/FPR2/TLR4/NCKAP1L/HLA-E/S100A14/IL15/BTK/RPS19/TLR2/CCR4/CCR1/TNFSF14/IL12B/KLK5/STAP1/S100A7/C3AR1/XCL1/CMKLR1/F12/TNF/TMSB4X/S100A8/LRRK2/CD74/S100A9/SIGLEC16/ARG1/CSF1/KLK7/CD6/IL33/TLR6/LTA/CCL7/DHX58/IL18/CD180/LY86/HSPB1/SUCNR1/LGMN/C1QA/TNFSF4/ITGB2/MIF/NOD2/CCL3/ITGAM/GHRL/S100A12…
GO:0060089	molecular transducer activity	280/2173	280	MF	1381/16967	2.48472e-16	6.01717e-14	GPR171/GPR65/PTPRC/OR2I1P/KLRD1/CD80/TNFRSF9/CD69/CCR5/CLEC7A/P2RY10/PTGER4/LILRB1/TLR8/GRIN3A/CD3G/FCGR1B/CD86/TRGC2/CYSLTR1/CD8A/TLR7/KRT17/CCR2/LY75/CD72/GPR174/SLAMF1/CCR8/CD2/IL2RA/HLA-DOA/IL18RAP/IL15RA/IGSF6/TLR3/KLRC1/P2RY12/HLA-DRA/CXCR6/TLR10/CD48/EFNA3/CSF2RB/P2RY14/LILRB2/GPR82/IL10RA/CD28/CD200R1/FPR2/CD8B/LAG3/GPR31/TLR4/GPR18/IL12RB1/EBI3/IL7R/IL2RB/HLA-DPA1/BTLA/TNFRSF17/KRT1/TLR2…
GO:0002715	regulation of natural killer cell mediated immunity	28/2341	28	BP	42/17910	1.28247e-15	7.94478e-14	SH2D1A/CRTAM/LILRB1/RASGRP1/IL18RAP/CD226/CD96/HAVCR2/HLA-F/LAG3/SLAMF6/HLA-E/IL12B/KIR2DL4/VAV1/CD160/KLRK1/SH2D1B/NCR3/PIK3R6/LGALS9/RAET1E/SERPINB9/HLA-G/RAET1G/NCR1/KLRC4-KLRK1/LEP
GO:0002228	natural killer cell mediated immunity	35/2341	35	BP	63/17910	1.39614e-15	8.58677e-14	SH2D1A/CRTAM/KLRD1/LILRB1/RASGRP1/IL18RAP/CD226/CD96/HAVCR2/HLA-F/LAG3/SLAMF6/HLA-E/GZMB/IL12B/KIR2DL4/VAV1/CD160/KLRK1/SH2D1B/SLAMF7/IL18/PTPN6/CORO1A/NCR3/PIK3R6/LGALS9/RAET1E/SERPINB9/HLA-G/RAET1G/NCR1/KLRC4-KLRK1/KIR3DL1/LEP
GO:0042611	MHC protein complex	21/2436	21	CC	25/18675	1.83706e-15	1.40229e-13	B2M/HLA-B/HLA-DOA/HLA-DRA/HLA-F/HLA-C/HLA-DMB/HLA-E/HLA-DPA1/HLA-DRB1/HLA-DQA2/HLA-DPB1/HLA-DOB/HLA-DQA1/CD74/HLA-DQB1/HLA-DMA/HLA-DRB5/HLA-H/HLA-DQB2/HLA-G
GO:0002695	negative regulation of leukocyte activation	61/2341	61	BP	163/17910	2.86563e-15	1.74987e-13	PDCD1LG2/IDO1/CD274/IRF1/PTPN22/SAMSN1/PTPRC/TIGIT/MNDA/LILRB1/LAX1/CCR2/CD84/IL2RA/TBX21/HAVCR2/LILRB2/HLA-F/LAG3/SLA2/BTK/BANK1/GAL/XCL1/MAD1L1/CD74/CST7/INPP5D/LST1/ARG1/SPN/SOCS1/IFNL1/NRARP/JAK3/VSIG4/CD300A/PTPN6/SFTPD/MILR1/TYROBP/TNFSF4/CD300LF/IL20RB/GPER1/FOXJ1/TSPAN32/LGALS9/FCGR2B/SOX11/RIPOR2/IL10/IHH/CNR2/HLA-G/AXL/CNR1/IL31RA/CTLA4/VTCN1/FGL1
GO:0097708	intracellular vesicle	406/2436	406	CC	2182/18675	2.5772e-15	1.81594e-13	CD274/GBP5/DTX3L/GCH1/B2M/PTPRC/TAP1/CYBB/FASLG/MNDA/CCR5/SRGN/TLR8/CTSS/CD3G/FCGR1B/CD38/TLR7/SLA/LRMP/MARCHF1/HLA-B/HLA-DOA/IL15RA/TLR3/JAK2/MSR1/ATP8B4/SLPI/HLA-DRA/PRF1/BIN2/PROM2/HAVCR2/LILRB2/TRIM21/SNX20/FCGR1A/LYZ/HLA-F/HLA-C/FPR2/FLG2/CD8B/VCAM1/CYTIP/AP1M2/SLA2/KRTDAP/DOCK2/CD53/TLR4/NCKAP1L/GPR18/RHOV/BSG/HLA-DMB/HLA-E/IL7R/RUFY4/IL2RB/HLA-DPA1/UBA52/RAB25/MPEG1/ARHGAP9/IL15/TAP2/SLC9A…
GO:0002790	peptide secretion	145/2341	145	BP	582/17910	3.07268e-15	1.863e-13	GBP1/CD274/GBP5/IFIH1/IFNG/PTPN22/CRTAM/BTN3A1/RSAD2/SRGN/PTGER4/LILRB1/DDX58/TLR8/CLECL1/CD38/CCL5/PLEK/LAX1/RASGRP1/CD2/JAK2/LYN/BTN3A2/TLR10/HAVCR2/NLRC4/AIF1/CD200R1/TLR4/TNFSF13B/HLA-E/CLEC9A/CLEC6A/TLR2/TLR1/BANK1/RAB8B/GAL/CD244/CLEC4E/FFAR4/CD160/LCP2/AIM2/GPI/TNF/CPLX1/TMSB4X/S100A8/LRRK2/CSF1R/CD74/NLRP3/PPARD/FCN1/PAEP/CARD11/NLRP7/POU2F2/SOCS1/IL33/TLR6/SUCNR1/CD33/TNFRSF1B/FERMT1/C1Q…
GO:0070887	cellular response to chemical stimulus	543/2341	543	BP	3100/17910	3.43945e-15	2.07069e-13	GBP1/STAT1/CXCL10/CXCL11/PARP14/XAF1/GBP5/GBP4/IFIH1/TRIM22/IRF1/PARP9/GCH1/IFNG/PTPN22/IFIT3/B2M/IFIT2/PTPRC/RSAD2/GBP3/TNIP3/BIRC3/PYHIN1/CD80/TNFRSF9/GBP2/CYBB/FASLG/CYLD/MNDA/CD69/CCR5/NMI/IPCEF1/NLRC5/CLEC7A/LILRB1/DDX58/CTSS/SAMHD1/FCGR1B/CD86/CCL5/CIITA/ACOD1/SOD2/CCL4/CCR2/CXCL13/HLA-B/CCR8/IL2RA/IL18RAP/IL15RA/TLR3/JAK2/SP100/STAT4/SLC8A1/TBX21/OAS2/P2RY12/P2RY13/CLIC2/PIK3CG/PSMB9/LYN/H…
GO:0031410	cytoplasmic vesicle	405/2436	405	CC	2179/18675	3.36676e-15	2.1228e-13	CD274/GBP5/DTX3L/GCH1/B2M/PTPRC/TAP1/CYBB/FASLG/MNDA/CCR5/SRGN/TLR8/CTSS/CD3G/FCGR1B/CD38/TLR7/SLA/LRMP/MARCHF1/HLA-B/HLA-DOA/IL15RA/TLR3/JAK2/MSR1/ATP8B4/SLPI/HLA-DRA/PRF1/BIN2/PROM2/HAVCR2/LILRB2/TRIM21/SNX20/FCGR1A/LYZ/HLA-F/HLA-C/FPR2/FLG2/CD8B/VCAM1/CYTIP/AP1M2/SLA2/KRTDAP/DOCK2/CD53/TLR4/NCKAP1L/GPR18/RHOV/BSG/HLA-DMB/HLA-E/IL7R/RUFY4/IL2RB/HLA-DPA1/UBA52/RAB25/MPEG1/ARHGAP9/IL15/TAP2/SLC9A…
GO:0072562	blood microparticle	57/2436	57	CC	147/18675	3.47621e-15	2.1228e-13	APOL1/CFB/IGKV4-1/JCHAIN/IGHV3-23/KRT1/IGHV3-13/IGKV2-30/IGHG1/IGKV1-17/C1S/IGKC/C1QC/IGKV1-39/CD5L/IGKV3-20/C1QB/IGLV3-25/IGKV3-15/IGLV1-47/SERPING1/IGKV1-5/IGLV3-21/IGLC2/CIB2/IGHV3-7/C1R/IGKV1D-12/IGKV3D-11/IGHG3/SLC2A1/IGLC3/ALB/HBA2/TMPRSS13/C4B/IGHM/HSPA7/IGHG2/CP/APOA1/CPN2/F13A1/C3/ACSM1/C4A/HBA1/POTEF/HBB/ACTC1/AMBP/IGHA2/AGT/IGHA1/APOA2/IGHD/F2
GO:0016192	vesicle-mediated transport	362/2341	362	BP	1899/17910	3.72942e-15	2.22957e-13	DTX3L/APOL1/IFNG/B2M/PTPRC/CCL8/FCGR3A/TAP1/CYBB/MNDA/CLEC7A/SRGN/LILRB1/GRIN3A/CTSS/CD3G/FCGR1B/CDC42SE2/CCL5/PLEK/CCR2/LY75/RASGRP1/LRMP/CD84/SLAMF1/IL15RA/MSR1/ATP8B4/SLPI/PIK3CG/LYN/BIN2/IRF8/PROM2/LILRB2/IL10RA/AIF1/FCGR1A/LYZ/HLA-F/FPR2/FLG2/IGKV2-29/AP1M2/DOCK2/SAMD9/CD53/TLR4/IGKV4-1/NCKAP1L/CLEC9A/IL2RB/ARHGAP25/UBA52/RAB25/ARHGAP9/PIK3R2/IL15/TAP2/IGLV3-19/JCHAIN/BTK/CTSW/IGHV3-23/EEF2/…
GO:0048731	system development	768/2341	768	BP	4670/17910	3.88686e-15	2.30755e-13	STAT1/CXCL10/THEMIS/IDO1/CD274/UBD/IRF1/IFNG/PTPN22/GPR171/B2M/PTPRC/RSAD2/ABCD2/ETV7/ICOS/CD80/CYBB/CASP5/FASLG/CYLD/JAKMIP1/SRGN/PTGER4/LILRB1/GRIN3A/SAMHD1/CD86/ST8SIA4/CD38/TNFSF10/PLEK/ACOD1/KRT17/SOD2/HEATR9/CCR2/CXCL13/RASGRP1/ERAP1/FCRL3/CD2/IL2RA/HLA-DOA/GAB3/IKZF3/TLR3/BATF2/JAK2/SP100/HERC6/SLC8A1/TBX21/OAS2/P2RY12/KRT10/EAF2/PIK3CG/PSMB9/LYN/NAIP/RNF213/EVI2B/IRF8/EFNA3/HAVCR2/WARS1/N…
GO:0044421	extracellular region part	573/2436	573	CC	3312/18675	4.76737e-15	2.72932e-13	CD274/LAP3/APOL1/B2M/PTPRC/FCGR3A/FASLG/MNDA/SRGN/CTSS/CD86/CD38/TNFSF10/KRT17/SOD2/LY75/ERAP1/APOL4/SLAMF1/IL15RA/SBSN/MSR1/KRT10/SLPI/PSMB9/LYN/HLA-DRA/TNFSF8/PROM2/CD48/RPL37A/WARS1/ADAMDEC1/LILRB2/SFN/LYZ/PI3/VCAM1/CFB/KRTDAP/DOCK2/SLAMF6/RPS2/CD53/KRT6B/IL27/IGKV4-1/IL7/TNFSF13B/NCKAP1L/MGAT4A/BSG/HLA-E/EBI3/PSMB8/S100A14/UBA52/RAB25/RPS5/RPS16/TGM1/GCNT1/IL15/RPLP2/IGLV3-19/JCHAIN/IGHV3-23/…
GO:0045089	positive regulation of innate immune response	105/2341	105	BP	373/17910	5.16179e-15	3.04332e-13	GBP5/DDX60/IFIH1/SH2D1A/IRF1/PARP9/PTPN22/CRTAM/RSAD2/TNIP3/BIRC3/PYHIN1/CYLD/MNDA/NLRC5/CLEC7A/DDX58/TLR8/CTSS/CCL5/TLR7/ACOD1/RASGRP1/FCRL3/IL18RAP/TLR3/CD226/PIK3AP1/PSMB9/LYN/TLR10/HAVCR2/NLRC4/HLA-F/FPR2/LAG3/SLAMF6/TLR4/HLA-E/PSMB8/S100A14/UBA52/CLEC6A/BTK/PSME2/RPS19/TLR2/CLEC4A/TLR1/TIFA/IL12B/KIR2DL4/CD1D/CLEC4E/VAV1/CD160/AIM2/CGAS/S100A8/KLRK1/S100A9/PSMB10/SH2D1B/HCK/FCN1/CLEC4C/CARD1…
GO:0002440	production of molecular mediator of immune response	67/2341	67	BP	191/17910	5.30513e-15	3.10641e-13	B2M/PTPRC/RSAD2/LILRB1/DDX58/SAMHD1/LAX1/CCR2/FCRL3/IL18RAP/TLR3/TBX21/CD96/CD28/HLA-F/TLR4/TNFSF13B/HLA-E/IL7R/BTK/TLR2/IL12B/CD244/KIR2DL4/KLK5/FGL2/CD160/XCL1/GPI/TNF/CGAS/SPINK5/MZB1/CD74/NLRP3/ARG1/HLA-DQB1/CARD11/KLK7/POU2F2/IL33/IL18/SASH3/JAK3/TNFRSF1B/IL18R1/DENND1B/TNFSF4/AICDA/MIF/NOD2/BST2/CCR6/FCGR2B/CD40LG/APOA1/ITM2A/KIT/IL10/HLA-G/RAET1G/IL1B/GATA3/RBP4/INAVA/IL13/APOA2
GO:0070268	cornification	48/2341	48	BP	112/17910	5.80445e-15	3.37566e-13	KRT17/KRT10/PI3/KRT6B/TGM1/KRT1/KRT2/PKP1/FLG/KRT14/EVPL/KRT5/KRT16/KLK5/DSC3/DSP/CASP14/KRT6A/SPINK5/KLK13/PPL/KRT6C/JUP/SPRR1B/PRSS8/SPRR1A/PKP3/DSG1/IVL/DSC1/SPRR2E/KRT80/SPRR2A/KLK14/KRT15/CSTA/DSC2/SPRR2D/KRT78/DSG3/KRT79/PERP/KRT19/KRT23/KRT7/TGM5/KRT81/KRT3
GO:0004896	cytokine receptor activity	39/2173	39	MF	78/16967	1.88794e-15	3.91881e-13	CCR5/CCR2/CCR8/IL2RA/IL18RAP/IL15RA/CXCR6/CSF2RB/IL12RB1/EBI3/IL7R/IL2RB/CCR4/IL21R/CCR1/CCR3/FLT3/CXCR3/CMKLR1/CCR9/IL9R/XCR1/CD74/CCRL2/IL2RG/IL18R1/CD4/IL23R/CCR6/CXCR4/CX3CR1/CXCR2/CCR7/CXCR1/IL31RA/IL22RA2/CXCR5/CNTFR/PRLR
GO:0001533	cornified envelope	28/2436	28	CC	44/18675	7.38298e-15	3.97812e-13	KRT10/PI3/CNFN/TGM1/KRT1/KRT2/PKP1/FLG/EVPL/DSC3/DSP/PPL/CST6/JUP/HRNR/SPRR1B/SPRR1A/PKP3/DSG1/IVL/DSC1/SPRR2E/SPRR2A/CSTA/DSC2/SPRR2D/DSG3/SCEL
GO:0030162	regulation of proteolysis	176/2341	176	BP	762/17910	7.01209e-15	4.05043e-13	IFNG/BIRC3/PYHIN1/FASLG/TNFSF10/TNFAIP8/JAK2/SLPI/CR1L/PSMB9/LYN/NAIP/EFNA3/NLRC4/TRIM21/SFN/PI3/IGKV2-29/CFB/IGKV4-1/PSMB8/IGLV3-19/IGHV3-23/CD27/TNFSF14/IGLV2-11/IGKV1-16/RPS3/IGHV3-13/IGKV2-30/IGHV4-39/IGHV3-30/HSPBP1/LCK/IGKV2-28/IGHV3-11/IGHG1/AIM2/IGLV2-14/IGHV4-59/IGKV1-17/C3AR1/IGHV3-33/C1S/CLN6/IGKC/F12/C2/TNF/C1QC/CR1/IGKV5-2/S100A8/LRRK2/SPINK5/IGLV1-51/A2ML1/CST6/IGKV1-39/NDUFA13/FAS/…
GO:0044433	cytoplasmic vesicle part	289/2436	289	CC	1450/18675	1.20256e-14	6.11971e-13	CD274/DTX3L/B2M/PTPRC/TAP1/CYBB/FASLG/MNDA/SRGN/TLR8/CTSS/CD3G/FCGR1B/CD38/TLR7/LRMP/MARCHF1/HLA-B/HLA-DOA/IL15RA/TLR3/JAK2/MSR1/ATP8B4/SLPI/HLA-DRA/PRF1/BIN2/LILRB2/SNX20/FCGR1A/LYZ/HLA-F/HLA-C/FPR2/FLG2/CD8B/AP1M2/SLA2/DOCK2/CD53/TLR4/NCKAP1L/GPR18/RHOV/BSG/HLA-DMB/HLA-E/IL7R/HLA-DPA1/UBA52/ARHGAP9/TAP2/SLC9A9/CTSW/EEF2/KRT1/TLR2/PKP1/HLA-DRB1/TLR1/CD3D/CLEC12A/FGD2/IL12B/RAB8B/RAB3A/HLA-DQA2/V…
GO:0071310	cellular response to organic substance	461/2341	461	BP	2564/17910	1.07818e-14	6.18615e-13	GBP1/STAT1/CXCL10/CXCL11/PARP14/XAF1/GBP5/GBP4/IFIH1/TRIM22/IRF1/PARP9/IFNG/PTPN22/IFIT3/B2M/IFIT2/PTPRC/RSAD2/GBP3/TNIP3/BIRC3/PYHIN1/CD80/TNFRSF9/GBP2/CYBB/FASLG/CYLD/MNDA/CCR5/NMI/NLRC5/CLEC7A/LILRB1/DDX58/CTSS/SAMHD1/FCGR1B/CD86/CCL5/CIITA/ACOD1/SOD2/CCL4/CCR2/CXCL13/HLA-B/CCR8/IL2RA/IL18RAP/IL15RA/TLR3/JAK2/SP100/STAT4/SLC8A1/TBX21/OAS2/P2RY12/P2RY13/PIK3CG/PSMB9/LYN/HLA-DRA/IFIT1/TNFSF8/IRF…
GO:0048513	animal organ development	584/2341	584	BP	3403/17910	1.35598e-14	7.72819e-13	STAT1/CXCL10/THEMIS/UBD/IRF1/IFNG/PTPN22/GPR171/B2M/PTPRC/RSAD2/ETV7/CD80/CASP5/FASLG/CYLD/JAKMIP1/SRGN/PTGER4/LILRB1/CD86/TNFSF10/PLEK/KRT17/HEATR9/CCR2/RASGRP1/FCRL3/CD2/IL2RA/HLA-DOA/GAB3/IKZF3/TLR3/BATF2/JAK2/HERC6/SLC8A1/TBX21/OAS2/P2RY12/KRT10/EAF2/PSMB9/LYN/EVI2B/IRF8/NEUROG3/LILRB2/CD28/AIF1/SFN/ALOX12B/ARL11/FLG2/PI3/VCAM1/LAG3/RHOH/ASPRV1/FLI1/DOCK2/SLAMF6/B4GALT2/CNFN/KRT6B/IL27/TLR4/I…
GO:0010647	positive regulation of cell communication	333/2341	333	BP	1730/17910	1.53086e-14	8.66713e-13	PARP14/UBD/DDX60/TRIM22/SH2D1A/PARP9/IFNG/PTPN22/TRAT1/PTPRC/APOL3/RSAD2/BIRC3/PYHIN1/ICOS/CD80/FASLG/CYLD/NLRC5/CLNK/CD3G/CD86/CD38/CDC42SE2/TNFSF10/CCL5/TLR7/SLA/CCL4/CCR2/RASGRP1/IFIT5/FCRL3/SLAMF1/TLR3/JAK2/P2RY12/CD226/PIK3CG/PIK3AP1/PSMB9/LYN/HAVCR2/LILRB2/IL10RA/CD28/SFN/ALOX12B/FPR2/SLA2/TLR4/IL7/IL7R/PSMB8/UBA52/PIK3R2/MLKL/SCIMP/IL15/TESPA1/CLEC6A/PSME2/TLR2/TLR1/GZMB/CD27/TIFA/SEMA4D/M…
GO:0045619	regulation of lymphocyte differentiation	60/2341	60	BP	164/17910	1.59994e-14	8.99863e-13	IRF1/IFNG/PTPRC/CD80/CYLD/CD86/CCR2/RASGRP1/FCRL3/CD2/IL2RA/HLA-DOA/IKZF3/TBX21/LILRB2/CD28/LAG3/IL27/IL7/NCKAP1L/IL12RB1/IL7R/IL15/TESPA1/BTK/CD27/PRDM1/IL12B/VNN1/ZNF683/CR1/TOX/SPINK5/SLAMF8/CD74/LILRB4/INPP5D/NLRP3/CARD11/SOCS1/IL18/SASH3/IFNL1/NRARP/JAK3/PTPN6/TNFSF4/PIK3R6/FOXJ1/IL23R/LGALS9/ZAP70/NFAM1/ADAM8/IHH/HLA-G/AXL/CTLA4/GATA3/CCL19
GO:0050777	negative regulation of immune response	55/2341	55	BP	143/17910	1.7103e-14	9.55646e-13	PARP14/SAMSN1/PTPRC/NMI/NLRC5/LILRB1/SAMHD1/ACOD1/NLRC3/CCR2/CD84/IL2RA/TBX21/CD96/LYN/HAVCR2/HLA-F/HLA-E/IL7R/PDCD1/RPS19/IL12B/KIR2DL4/CD160/XCL1/TNF/CR1/SPINK5/SLAMF8/INPP5D/ARG1/IL33/DHX58/IFNL1/JAK3/VSIG4/NLRX1/SERPING1/CD300A/PTPN6/TNFSF4/IL20RB/NLRP6/FOXJ1/BST2/LGALS9/FCGR2B/APOA1/IL10/SERPINB9/HLA-G/CTLA4/AMBP/ALOX15/APOA2
GO:0023056	positive regulation of signaling	333/2341	333	BP	1736/17910	2.50236e-14	1.38913e-12	PARP14/UBD/DDX60/TRIM22/SH2D1A/PARP9/IFNG/PTPN22/TRAT1/PTPRC/APOL3/RSAD2/BIRC3/PYHIN1/ICOS/CD80/FASLG/CYLD/NLRC5/CLNK/CD3G/CD86/CD38/CDC42SE2/TNFSF10/CCL5/TLR7/SLA/CCL4/CCR2/RASGRP1/IFIT5/FCRL3/SLAMF1/TLR3/JAK2/P2RY12/CD226/PIK3CG/PIK3AP1/PSMB9/LYN/HAVCR2/LILRB2/IL10RA/CD28/SFN/ALOX12B/FPR2/SLA2/TLR4/IL7/IL7R/PSMB8/UBA52/PIK3R2/MLKL/SCIMP/IL15/TESPA1/CLEC6A/PSME2/TLR2/TLR1/GZMB/CD27/TIFA/SEMA4D/M…
GO:0030659	cytoplasmic vesicle membrane	169/2436	169	CC	735/18675	3.36815e-14	1.62381e-12	B2M/PTPRC/TAP1/CYBB/CD3G/FCGR1B/CD38/LRMP/MARCHF1/HLA-B/IL15RA/MSR1/ATP8B4/HLA-DRA/LILRB2/FCGR1A/HLA-F/HLA-C/FPR2/AP1M2/CD53/NCKAP1L/GPR18/BSG/HLA-E/IL7R/HLA-DPA1/UBA52/TAP2/TLR2/PKP1/HLA-DRB1/TLR1/CD3D/CLEC12A/RAB8B/RAB3A/HLA-DQA2/VNN1/HLA-DPB1/CD163/RAB37/HLA-DQA1/TMEM184A/DSP/TBC1D10C/C3AR1/SEMA4C/DBH/CR1/ITGAL/LRRK2/CBARP/RAB23/CD74/LILRB3/SLC2A5/AGPAT2/ECE2/LAIR1/GPR84/LAMP3/REEP6/CLEC4C/HLA…
GO:0001912	positive regulation of leukocyte mediated cytotoxicity	26/2341	26	BP	40/17910	3.37537e-14	1.86168e-12	SH2D1A/CRTAM/B2M/PTPRC/RASGRP1/IL18RAP/CD226/HLA-F/LAG3/SLAMF6/IL12RB1/HLA-E/IL12B/STAP1/VAV1/CD160/XCL1/KLRK1/ARG1/TYROBP/NCR3/ITGAM/IL23R/RAET1E/NOS2/KLRC4-KLRK1
GO:0006810	transport	778/2341	778	BP	4785/17910	3.87412e-14	2.12307e-12	GBP1/CXCL10/CXCL11/AKAP5/CD274/GBP5/IFIH1/CALHM6/DTX3L/APOL1/CXCL9/IFNG/PTPN22/CRTAM/TRAT1/B2M/PTPRC/APOL3/BTN3A1/RSAD2/ABCD2/CCL8/FCGR3A/BHLHE40-AS1/TAP1/CYBB/FASLG/MNDA/CCR5/IPCEF1/CLEC7A/JAKMIP1/SRGN/PTGER4/LILRB1/DDX58/TLR8/GRIN3A/CLECL1/CTSS/CD3G/FCGR1B/CD38/CDC42SE2/CYSLTR1/CCL5/PLEK/LAX1/CCL4/CCR2/LY75/RASGRP1/LRMP/APOL4/FCRL3/CD84/SLAMF1/CD2/IL15RA/JAK2/SP100/MSR1/ATP8B4/SLC8A1/OAS2/P2RY1…
GO:0046631	alpha-beta T cell activation	52/2341	52	BP	133/17910	4.05416e-14	2.20758e-12	CD274/IRF1/IFNG/PTPRC/RSAD2/CD80/PTGER4/LILRB1/CD86/CCR2/TBX21/CD28/DOCK2/SLAMF6/IL27/NCKAP1L/GPR18/IL12RB1/HLA-E/EBI3/IL15/PLA2G2D/CLEC4A/PRDM1/IL12B/ZNF683/GPR183/CD160/XCL1/PRKCQ/NLRP3/RASAL3/SPN/SOCS1/IL18/SASH3/JAK3/CD3E/CD300A/IL18R1/TNFSF4/LY9/EOMES/BCL11B/IL23R/LGALS9/ZAP70/IHH/GATA3/RORC/CCL19/PAX1
GO:0032729	positive regulation of interferon-gamma production	33/2341	33	BP	62/17910	4.79717e-14	2.59563e-12	PTPN22/TLR8/TLR7/CCR2/RASGRP1/CD2/TLR3/IRF8/HAVCR2/SLAMF6/IL27/TLR4/IL12RB1/EBI3/HLA-DPA1/IL12B/CD244/HLA-DPB1/CD160/TNF/KLRK1/LTA/IL18/SASH3/IFNL1/CD3E/IL18R1/TNFSF4/TXK/IL23R/LGALS9/IL1B/KLRC4-KLRK1
GO:0051239	regulation of multicellular organismal process	543/2341	543	BP	3144/17910	5.32647e-14	2.8639e-12	GBP1/STAT1/CXCL10/PDCD1LG2/IDO1/CD274/GBP5/DDX60/IFIH1/IRF1/GCH1/IFNG/PTPN22/GPR171/CRTAM/B2M/PTPRC/RSAD2/BIRC3/ABCD2/CD80/TIGIT/CYBB/FASLG/CYLD/NMI/NLRC5/SRGN/PTGER4/LILRB1/DDX58/TLR8/CD86/CD38/ZBP1/PLEK/TLR7/ACOD1/KRT17/SOD2/NLRC3/CCR2/CXCL13/RASGRP1/ERAP1/FCRL3/CD84/SLAMF1/CD2/IL2RA/HLA-DOA/IKZF3/TLR3/JAK2/SP100/SMTNL1/SLC8A1/TBX21/OAS2/P2RY12/CLIC2/EAF2/PIK3CG/CD96/PSMB9/LYN/EVI2B/IRF8/TLR10/…
GO:0042267	natural killer cell mediated cytotoxicity	32/2341	32	BP	59/17910	5.7434e-14	3.06877e-12	SH2D1A/CRTAM/LILRB1/RASGRP1/IL18RAP/CD226/HAVCR2/HLA-F/LAG3/SLAMF6/HLA-E/GZMB/IL12B/KIR2DL4/VAV1/CD160/KLRK1/SLAMF7/IL18/PTPN6/CORO1A/NCR3/PIK3R6/LGALS9/RAET1E/SERPINB9/HLA-G/RAET1G/NCR1/KLRC4-KLRK1/KIR3DL1/LEP
GO:0001818	negative regulation of cytokine production	86/2341	86	BP	290/17910	6.33682e-14	3.36481e-12	GBP1/PDCD1LG2/IDO1/CD274/IFIH1/IFNG/PTPN22/PTPRC/ABCD2/TIGIT/CYLD/NMI/NLRC5/SRGN/PTGER4/LILRB1/DDX58/TLR8/ACOD1/NLRC3/CD84/SLAMF1/TBX21/CD96/HAVCR2/HLA-F/CD200R1/UBE2L6/LAG3/UBA7/TLR4/NCKAP1L/GPR18/BTK/CLEC4A/BANK1/IL12B/FFAR4/XCL1/CMKLR1/MC1R/TNF/TMSB4X/INPP5D/NLRP3/ARG1/NLRP7/IL33/TLR6/DHX58/IFNL1/CD33/JAK3/VSIG4/NLRX1/PTPN6/SFTPD/WNT11/TYROBP/TNFSF4/HERC5/GSTP1/ISG15/CARD17/CDH3/MEFV/IL20RB/GH…
GO:0012506	vesicle membrane	171/2436	171	CC	754/18675	8.58852e-14	3.93354e-12	GBP1/B2M/PTPRC/TAP1/CYBB/CD3G/FCGR1B/CD38/LRMP/MARCHF1/HLA-B/IL15RA/MSR1/ATP8B4/HLA-DRA/LILRB2/FCGR1A/HLA-F/HLA-C/FPR2/AP1M2/CD53/NCKAP1L/GPR18/BSG/HLA-E/IL7R/HLA-DPA1/UBA52/TAP2/TLR2/PKP1/HLA-DRB1/TLR1/CD3D/CLEC12A/RAB8B/RAB3A/HLA-DQA2/VNN1/HLA-DPB1/CD163/RAB37/HLA-DQA1/TMEM184A/DSP/TBC1D10C/C3AR1/SEMA4C/DBH/CR1/ITGAL/LRRK2/CBARP/RAB23/CD74/LILRB3/SLC2A5/AGPAT2/ECE2/LAIR1/GPR84/LAMP3/REEP6/CLEC4…
GO:0043299	leukocyte degranulation	132/2341	132	BP	532/17910	7.81144e-14	4.12222e-12	B2M/PTPRC/CYBB/MNDA/CTSS/CCR2/RASGRP1/LRMP/CD84/ATP8B4/SLPI/PIK3CG/LYN/BIN2/LILRB2/LYZ/HLA-F/FPR2/FLG2/DOCK2/CD53/NCKAP1L/ARHGAP9/BTK/EEF2/KRT1/TLR2/PKP1/CLEC12A/RAB3A/VNN1/IMPDH2/FGL2/DPP7/RAB37/PLAC8/DSP/TBC1D10C/S100A7/C3AR1/GPI/LAT2/CR1/S100P/S100A8/ITGAL/APRT/HK3/S100A9/LILRB3/SLC2A5/AGPAT2/JUP/LAIR1/GPR84/HCK/ARG1/HRNR/FCN1/CDA/CLEC4C/SLC27A2/TICAM2/SIGLEC5/CALML5/GLIPR1/CLEC4D/HLA-H/ADA2/G…
GO:0050866	negative regulation of cell activation	64/2341	64	BP	187/17910	8.05363e-14	4.22396e-12	PDCD1LG2/IDO1/CD274/IRF1/PTPN22/SAMSN1/PTPRC/TIGIT/MNDA/LILRB1/LAX1/CCR2/CD84/IL2RA/TBX21/HAVCR2/LILRB2/HLA-F/LAG3/SLA2/BTK/BANK1/GAL/XCL1/MAD1L1/CD74/CST7/INPP5D/LST1/ARG1/SPN/SOCS1/IFNL1/NRARP/JAK3/VSIG4/CD300A/PTPN6/SFTPD/MILR1/TYROBP/TNFSF4/CD300LF/IL20RB/GPER1/FOXJ1/TSPAN32/LGALS9/FCGR2B/NOS3/SOX11/RIPOR2/IL10/IHH/CNR2/HLA-G/AXL/CNR1/IL31RA/CTLA4/VTCN1/CYGB/F2/FGL1
GO:0009306	protein secretion	135/2341	135	BP	549/17910	8.3972e-14	4.37729e-12	GBP1/CD274/GBP5/IFIH1/IFNG/PTPN22/CRTAM/BTN3A1/RSAD2/SRGN/PTGER4/LILRB1/DDX58/TLR8/CLECL1/CD38/CCL5/PLEK/LAX1/RASGRP1/CD2/JAK2/LYN/BTN3A2/TLR10/HAVCR2/NLRC4/AIF1/CD200R1/TLR4/TNFSF13B/HLA-E/CLEC9A/CLEC6A/TLR2/TLR1/BANK1/GAL/CD244/CLEC4E/FFAR4/CD160/LCP2/AIM2/GPI/TNF/CPLX1/TMSB4X/LRRK2/CSF1R/NLRP3/PPARD/FCN1/PAEP/CARD11/NLRP7/POU2F2/SOCS1/IL33/TLR6/SUCNR1/CD33/TNFRSF1B/FERMT1/C1QTNF12/VSNL1/TNFSF4…
GO:0010033	response to organic substance	541/2341	541	BP	3138/17910	8.48163e-14	4.39451e-12	GBP1/STAT1/CXCL10/CXCL11/PARP14/XAF1/IDO1/CD274/GBP5/GBP4/UBD/IFIH1/TRIM22/IRF1/PARP9/GCH1/IFNG/PTPN22/IFIT3/B2M/IFIT2/PTPRC/RSAD2/GBP3/TNIP3/BIRC3/PYHIN1/CD80/TNFRSF9/GBP2/CYBB/FASLG/CYLD/MNDA/CCR5/NMI/NLRC5/CLEC7A/PTGER4/LILRB1/DDX58/GRIN3A/CTSS/SAMHD1/FCGR1B/CD86/CD38/TNFSF10/CCL5/CIITA/ACOD1/SOD2/CCL4/CCR2/CXCL13/HLA-B/CCR8/IL2RA/IL18RAP/IL15RA/TLR3/JAK2/SP100/STAT4/SLC8A1/TBX21/OAS2/P2RY12/P…
GO:1902105	regulation of leukocyte differentiation	81/2341	81	BP	267/17910	8.74147e-14	4.50186e-12	IRF1/IFNG/PTPRC/CD80/CYLD/LILRB1/CD86/CCR2/RASGRP1/FCRL3/CD2/IL2RA/HLA-DOA/IKZF3/TLR3/TBX21/LYN/EVI2B/LILRB2/CD28/LAG3/IL27/TLR4/IL7/NCKAP1L/IL12RB1/IL7R/IL15/TESPA1/BTK/CD27/CCR1/PRDM1/IL12B/VNN1/HCLS1/ZNF683/TNF/C1QC/CR1/TOX/SPINK5/SLAMF8/CD74/LILRB4/INPP5D/NLRP3/LILRB3/CSF1/CARD11/SOCS1/IL18/SASH3/IFNL1/NRARP/JAK3/PTPN6/TMEM176B/TYROBP/TNFSF4/CCL3/CD4/PIK3R6/FOXJ1/IL23R/LGALS9/FCGR2B/ZAP70/TNF…
GO:0060326	cell chemotaxis	78/2341	78	BP	253/17910	9.79201e-14	5.01269e-12	CXCL10/CXCL11/CCR5/CCL5/CCL4/CCR2/CXCL13/PIK3CG/LYN/BIN2/AIF1/FPR2/VCAM1/NCKAP1L/GPR18/S100A14/RPS19/CCR1/TNFSF14/STAP1/GPR183/VAV1/S100A7/C3AR1/CXCR3/XCL1/CMKLR1/PRKCQ/TMSB4X/S100A8/KLRK1/CCL25/SLAMF8/CD74/S100A9/JAML/CSF1/CCL2/CCL7/HSPB1/LGMN/CORO1A/SFTPD/ITGB2/FGF1/PTPRO/GSTP1/MIF/CCL3/PLEKHG5/VAV3/S100A12/RAC2/EDN3/CCR6/LGALS9/F7/CXCL12/CXCR4/TNFSF11/ADAM8/CXCR2/EDN2/RIPOR2/KIT/IL10/CNR2/CCR7…
GO:0002520	immune system development	202/2341	202	BP	938/17910	1.15465e-13	5.87563e-12	STAT1/THEMIS/IDO1/CD274/UBD/IRF1/IFNG/PTPN22/GPR171/B2M/PTPRC/RSAD2/ICOS/CD80/CYLD/PTGER4/LILRB1/SAMHD1/CD86/PLEK/ACOD1/HEATR9/CCR2/RASGRP1/FCRL3/CD2/IL2RA/HLA-DOA/GAB3/IKZF3/TLR3/BATF2/JAK2/HERC6/TBX21/PSMB9/LYN/EVI2B/IRF8/HAVCR2/LILRB2/CD28/ARL11/VCAM1/LAG3/RHOH/FLI1/DOCK2/SLAMF6/IL27/TLR4/IL7/NCKAP1L/GPR18/IL12RB1/HLA-E/IL7R/PSMB8/IL15/TESPA1/IKZF1/PLA2G2D/PDCD1/DOCK11/BTK/PSME2/EEF2/RPS19/TLR…
GO:0002275	myeloid cell activation involved in immune response	133/2341	133	BP	542/17910	1.52577e-13	7.71821e-12	B2M/PTPRC/CYBB/MNDA/CTSS/CCR2/RASGRP1/LRMP/CD84/SLAMF1/ATP8B4/SLPI/PIK3CG/LYN/BIN2/HAVCR2/LILRB2/LYZ/FPR2/FLG2/DOCK2/CD53/NCKAP1L/ARHGAP9/BTK/EEF2/KRT1/TLR2/PKP1/CLEC12A/RAB3A/VNN1/IMPDH2/FGL2/DPP7/RAB37/PLAC8/DSP/TBC1D10C/S100A7/C3AR1/GPI/LAT2/CR1/S100P/S100A8/ITGAL/APRT/HK3/S100A9/LILRB3/SLC2A5/AGPAT2/JUP/LAIR1/GPR84/ARG1/HRNR/FCN1/CDA/CLEC4C/SLC27A2/TICAM2/IL33/SIGLEC5/CALML5/GLIPR1/CLEC4D/HLA…
GO:0042605	peptide antigen binding	22/2173	22	MF	30/16967	4.38099e-14	7.95697e-12	TAP1/HLA-B/HLA-DRA/TRGV9/HLA-F/HLA-C/HLA-E/HLA-DPA1/HLA-DRB1/TRAV19/HLA-DPB1/HLA-DQA1/TRAV29DV5/HLA-DQB1/HLA-DRB5/TRBV7-9/TRBV12-3/TRGV3/TRAV8-4/SLC7A5/CD209/HLA-G
GO:0042269	regulation of natural killer cell mediated cytotoxicity	25/2341	25	BP	39/17910	1.69836e-13	8.54075e-12	SH2D1A/CRTAM/LILRB1/RASGRP1/IL18RAP/CD226/HAVCR2/HLA-F/LAG3/SLAMF6/HLA-E/IL12B/KIR2DL4/VAV1/CD160/KLRK1/NCR3/PIK3R6/LGALS9/RAET1E/SERPINB9/HLA-G/NCR1/KLRC4-KLRK1/LEP
GO:0002705	positive regulation of leukocyte mediated immunity	47/2341	47	BP	117/17910	2.06865e-13	1.0342e-11	SH2D1A/CRTAM/B2M/PTPRC/RSAD2/DDX58/RASGRP1/IL18RAP/TBX21/CD226/CD28/HLA-F/LAG3/SLAMF6/IL12RB1/HLA-E/BTK/IL12B/KIR2DL4/VAV1/CD160/XCL1/TNF/KLRK1/NLRP3/SH2D1B/ARG1/LTA/IL18/SASH3/PTAFR/IL18R1/TNFSF4/ITGB2/NCR3/NOD2/ITGAM/IL23R/FCER2/RAET1E/HLA-G/RAET1G/C3/IL1B/KLRC4-KLRK1/GATA3/IL13
GO:0048534	hematopoietic or lymphoid organ development	193/2341	193	BP	890/17910	2.15144e-13	1.06934e-11	STAT1/THEMIS/UBD/IRF1/IFNG/PTPN22/GPR171/B2M/PTPRC/RSAD2/CD80/CYLD/PTGER4/LILRB1/CD86/PLEK/HEATR9/CCR2/RASGRP1/FCRL3/CD2/IL2RA/HLA-DOA/GAB3/IKZF3/TLR3/BATF2/JAK2/HERC6/TBX21/PSMB9/LYN/EVI2B/IRF8/LILRB2/CD28/ARL11/VCAM1/LAG3/RHOH/FLI1/DOCK2/SLAMF6/IL27/TLR4/IL7/NCKAP1L/GPR18/IL12RB1/IL7R/PSMB8/IL15/TESPA1/IKZF1/PLA2G2D/DOCK11/BTK/PSME2/EEF2/RPS19/TLR2/CD27/CD3D/CCR1/PRDM1/IL12B/PLCL2/SPTA1/VNN1/HC…
GO:0005615	extracellular space	525/2436	525	CC	3051/18675	2.88401e-13	1.25798e-11	CD274/LAP3/APOL1/B2M/PTPRC/FCGR3A/FASLG/MNDA/SRGN/CTSS/CD86/CD38/TNFSF10/KRT17/SOD2/LY75/ERAP1/APOL4/SLAMF1/IL15RA/SBSN/MSR1/KRT10/SLPI/PSMB9/LYN/HLA-DRA/TNFSF8/PROM2/CD48/RPL37A/WARS1/LILRB2/SFN/LYZ/VCAM1/CFB/KRTDAP/DOCK2/SLAMF6/RPS2/CD53/KRT6B/IL27/IGKV4-1/IL7/TNFSF13B/NCKAP1L/MGAT4A/BSG/HLA-E/EBI3/PSMB8/S100A14/UBA52/RAB25/RPS5/RPS16/TGM1/GCNT1/IL15/RPLP2/IGLV3-19/JCHAIN/IGHV3-23/RPS28/PSME2/E…
GO:0050707	regulation of cytokine secretion	66/2341	66	BP	201/17910	3.04586e-13	1.50515e-11	GBP1/CD274/IFIH1/PTPN22/CRTAM/SRGN/PTGER4/LILRB1/DDX58/TLR8/RASGRP1/CD2/LYN/TLR10/HAVCR2/AIF1/CD200R1/TLR4/CLEC9A/CLEC6A/TLR2/TLR1/BANK1/CD244/CLEC4E/FFAR4/CD160/AIM2/TNF/TMSB4X/LRRK2/CSF1R/NLRP3/FCN1/PAEP/NLRP7/SOCS1/IL33/TLR6/TNFRSF1B/FERMT1/MIF/NOD2/CCL3/CARD17/IL26/GHRL/LILRA2/LGALS9/FCGR2B/APOA1/LILRA5/IL36RN/CLEC5A/IL10/CCR7/IL1B/TSLP/CIDEA/CCL1/GATA3/VTCN1/APOA2/SAA1/CCL19/IGHD
GO:0002708	positive regulation of lymphocyte mediated immunity	40/2341	40	BP	91/17910	3.83962e-13	1.88649e-11	SH2D1A/CRTAM/B2M/PTPRC/RSAD2/RASGRP1/IL18RAP/TBX21/CD226/CD28/HLA-F/LAG3/SLAMF6/IL12RB1/HLA-E/BTK/IL12B/KIR2DL4/VAV1/CD160/XCL1/TNF/KLRK1/NLRP3/SH2D1B/LTA/IL18/SASH3/IL18R1/TNFSF4/NCR3/IL23R/FCER2/RAET1E/HLA-G/RAET1G/C3/IL1B/KLRC4-KLRK1/GATA3
GO:0010469	regulation of signaling receptor activity	140/2341	140	BP	588/17910	4.11585e-13	2.01065e-11	CXCL10/CXCL11/CXCL9/IFNG/CCL8/FASLG/TNFSF10/CCL5/CCL4/CCR2/CXCL13/XCL2/TNFSF8/IL27/IL7/TNFSF13B/EBI3/IL15/TNFSF14/IL12B/GAL/CBLC/IL18BP/XCL1/JAG2/GPI/TNF/SECTM1/CCL25/LYPD6B/IL32/CSF1/IL33/CRLF1/CCL2/LTA/CCL7/IL18/CNIH2/SHANK1/PMCH/ADA2/IFNL1/GMFG/LHB/ANGPTL8/TNFSF18/EPO/C1QTNF12/TNFSF4/TNFSF15/FGF1/PNOC/DKKL1/WNT3A/MIF/CCL3/CLEC11A/IL26/MACC1/GHRL/IL36G/CHGB/EREG/MTRNR2L12/ENDOU/OSGIN1/FGF5/EDN3…
GO:0002444	myeloid leukocyte mediated immunity	133/2341	133	BP	549/17910	4.21465e-13	2.04722e-11	B2M/PTPRC/CYBB/MNDA/DDX58/CTSS/CCR2/RASGRP1/LRMP/CD84/ATP8B4/SLPI/PIK3CG/LYN/BIN2/LILRB2/LYZ/FPR2/FLG2/DOCK2/CD53/NCKAP1L/HLA-E/ARHGAP9/BTK/EEF2/KRT1/TLR2/PKP1/CLEC12A/RAB3A/VNN1/IMPDH2/FGL2/DPP7/RAB37/PLAC8/DSP/TBC1D10C/S100A7/C3AR1/GPI/LAT2/CR1/S100P/S100A8/ITGAL/APRT/HK3/S100A9/LILRB3/SLC2A5/AGPAT2/JUP/LAIR1/GPR84/ARG1/HRNR/FCN1/CDA/CLEC4C/SLC27A2/TICAM2/SIGLEC5/CALML5/GLIPR1/CLEC4D/HLA-H/ADA2…
GO:0051250	negative regulation of lymphocyte activation	50/2341	50	BP	132/17910	5.25316e-13	2.53725e-11	PDCD1LG2/IDO1/CD274/IRF1/PTPN22/SAMSN1/TIGIT/MNDA/LILRB1/LAX1/IL2RA/TBX21/HAVCR2/LILRB2/HLA-F/LAG3/SLA2/BTK/BANK1/GAL/XCL1/MAD1L1/CD74/INPP5D/LST1/ARG1/SPN/SOCS1/IFNL1/NRARP/JAK3/VSIG4/CD300A/PTPN6/SFTPD/TYROBP/TNFSF4/IL20RB/FOXJ1/LGALS9/FCGR2B/SOX11/RIPOR2/IL10/IHH/HLA-G/AXL/CTLA4/VTCN1/FGL1
GO:0006968	cellular defense response	29/2341	29	BP	53/17910	6.44288e-13	3.09439e-11	SH2D1A/CXCL9/TRAT1/MNDA/CCR5/CCR2/ITK/PRF1/LILRB2/CCR3/KIR2DL4/CCR9/RAB23/CD5L/SPN/KLRG1/TYROBP/NCF2/CCR6/NCF1/LSP1/CX3CR1/CD300C/CXCR2/CLEC5A/HLA-G/NCR1/KIR3DL2/GNLY
GO:0098590	plasma membrane region	230/2436	230	CC	1130/18675	9.28713e-13	3.86682e-11	FASLG/DDX58/GRIN3A/CD38/PLEK/CD8A/IFIT5/JAK2/SLC8A1/P2RY12/NAIP/PROM2/NSMF/AIF1/DOCK8/EPPK1/RAB25/SCIMP/DDN/CPEB3/CLCA2/SLC12A3/FGD2/NECTIN1/TSHR/TENM2/RPS3/LCP1/CD1D/TACSTD2/SLC40A1/LCP2/PSTPIP1/DSP/TBC1D10C/SLC19A1/SEMA4C/TMEM240/CLIC5/MYO7A/S100P/PEMT/LRRK2/SLC1A6/MS4A1/ATP12A/SLC7A7/SLC39A4/AJAP1/EPS8L1/SCNN1A/SLC2A5/JUP/NDUFS7/NCS1/SLC27A4/BMX/HCK/IQCE/ABCA4/DBN1/CRB3/P2RY6/DUOX1/LRFN1/PLCD3…
GO:0048018	receptor ligand activity	104/2173	104	MF	397/16967	2.78064e-13	4.48919e-11	CXCL10/CXCL11/CXCL9/FASLG/TNFSF10/CCL5/CCL4/CXCL13/TNFSF8/IL27/IL7/TNFSF13B/EBI3/IL15/TNFSF14/IL12B/GAL/XCL1/JAG2/GPI/TNF/SECTM1/CCL25/IL32/CSF1/IL33/CRLF1/LTA/CCL7/IL18/PMCH/ADA2/IFNL1/GMFG/ANGPTL8/TNFSF18/EPO/C1QTNF12/TNFSF4/TNFSF15/FGF1/PNOC/WNT3A/MIF/CCL3/CLEC11A/IL26/MACC1/GHRL/IL36G/CHGB/ENDOU/OSGIN1/FGF5/EDN3/INSL3/CXCL12/CD40LG/NRTN/ERFE/TNFSF11/APOA1/WNT7B/IL37/WNT3/PPBP/EDN2/WNT10B/CD70…
GO:0030545	receptor regulator activity	109/2173	109	MF	425/16967	3.30555e-13	4.80297e-11	CXCL10/CXCL11/CXCL9/FASLG/TNFSF10/CCL5/CCL4/CXCL13/TNFSF8/IL27/IL7/TNFSF13B/EBI3/IL15/TNFSF14/IL12B/GAL/IL18BP/XCL1/JAG2/GPI/TNF/SECTM1/CCL25/LYPD6B/IL32/CSF1/IL33/CRLF1/LTA/CCL7/IL18/PMCH/ADA2/IFNL1/GMFG/ANGPTL8/TNFSF18/EPO/C1QTNF12/TNFSF4/TNFSF15/FGF1/PNOC/WNT3A/MIF/CCL3/CLEC11A/IL26/MACC1/GHRL/IL36G/CHGB/ENDOU/OSGIN1/FGF5/EDN3/INSL3/CXCL12/CD40LG/NRTN/ERFE/TNFSF11/APOA1/WNT7B/IL37/WNT3/PCSK9/L…
GO:0070664	negative regulation of leukocyte proliferation	34/2341	34	BP	71/17910	1.08348e-12	5.1747e-11	PDCD1LG2/IDO1/CD274/CCL8/MNDA/LILRB1/IL2RA/LYN/HAVCR2/LILRB2/BTK/GAL/XCL1/MAD1L1/INPP5D/LST1/ARG1/SPN/VSIG4/CD300A/PTPN6/SFTPD/TYROBP/GSTP1/IL20RB/FOXJ1/LGALS9/FCGR2B/SOX11/IL10/IHH/HLA-G/CTLA4/VTCN1
GO:0045580	regulation of T cell differentiation	51/2341	51	BP	139/17910	1.29957e-12	6.17224e-11	IRF1/IFNG/PTPRC/CD80/CYLD/CD86/CCR2/RASGRP1/CD2/IL2RA/HLA-DOA/TBX21/LILRB2/CD28/LAG3/IL27/IL7/NCKAP1L/IL12RB1/IL7R/IL15/TESPA1/CD27/PRDM1/IL12B/VNN1/ZNF683/CR1/SPINK5/CD74/LILRB4/NLRP3/CARD11/SOCS1/IL18/SASH3/IFNL1/NRARP/JAK3/TNFSF4/PIK3R6/FOXJ1/IL23R/LGALS9/ZAP70/ADAM8/IHH/HLA-G/CTLA4/GATA3/CCL19
GO:0010646	regulation of cell communication	599/2341	599	BP	3589/17910	1.42888e-12	6.74891e-11	GBP1/STAT1/CXCL10/CXCL11/PARP14/AKAP5/UBD/DDX60/TRIM22/SH2D1A/IRF1/PARP9/CXCL9/IFNG/PTPN22/TRAT1/PTPRC/APOL3/RSAD2/TNIP3/BIRC3/PYHIN1/CCL8/ICOS/CD80/FASLG/CYLD/NLRC5/RGS18/GRIN3A/CLNK/CD3G/SAMHD1/CD86/CD38/CDC42SE2/TNFSF10/CCL5/PLEK/LAX1/TLR7/ACOD1/SLA/SOD2/CCL4/NLRC3/CCR2/CXCL13/RASGRP1/XCL2/IFIT5/FCRL3/SLAMF1/TLR3/JAK2/SP100/TAGAP/SLC8A1/P2RY12/CD226/CLIC2/PIK3CG/PIK3AP1/PSMB9/LYN/RNF213/TNFSF8…
GO:0030154	cell differentiation	646/2341	646	BP	3923/17910	1.80337e-12	8.47091e-11	GBP1/STAT1/CXCL10/THEMIS/UBD/IRF1/CXCL9/IFNG/PTPN22/GPR171/B2M/PTPRC/RSAD2/CD80/FASLG/CYLD/PTGER4/LILRB1/GRIN3A/CD86/CD38/PLEK/KRT17/SOD2/HEATR9/CCR2/RASGRP1/ERAP1/FCRL3/CD2/IL2RA/HLA-DOA/GAB3/IKZF3/TLR3/BATF2/JAK2/MSR1/HERC6/SLC8A1/TBX21/P2RY12/KRT10/PSMB9/LYN/EVI2B/IRF8/EFNA3/NSMF/NEUROG3/LILRB2/CD28/SFN/FPR2/ARL11/PI3/VCAM1/LAG3/RHOH/MIAT/FLI1/KRTDAP/DOCK2/SLAMF6/CNFN/CD53/KRT6B/IL27/TLR4/IL7/…
GO:0051234	establishment of localization	784/2341	784	BP	4908/17910	1.99794e-12	9.33353e-11	GBP1/CXCL10/CXCL11/AKAP5/CD274/GBP5/IFIH1/CALHM6/DTX3L/APOL1/CXCL9/IFNG/PTPN22/CRTAM/TRAT1/B2M/PTPRC/APOL3/BTN3A1/RSAD2/ABCD2/CCL8/FCGR3A/BHLHE40-AS1/TAP1/CYBB/FASLG/MNDA/CCR5/IPCEF1/CLEC7A/JAKMIP1/SRGN/PTGER4/LILRB1/DDX58/TLR8/GRIN3A/CLECL1/CTSS/CD3G/FCGR1B/CD38/CDC42SE2/CYSLTR1/CCL5/PLEK/LAX1/CCL4/CCR2/LY75/RASGRP1/LRMP/APOL4/FCRL3/CD84/SLAMF1/CD2/IL15RA/JAK2/SP100/MSR1/ATP8B4/SLC8A1/OAS2/P2RY1…
GO:0002717	positive regulation of natural killer cell mediated immunity	20/2341	20	BP	28/17910	2.13859e-12	9.93629e-11	SH2D1A/CRTAM/RASGRP1/IL18RAP/CD226/HLA-F/LAG3/SLAMF6/HLA-E/IL12B/KIR2DL4/VAV1/CD160/KLRK1/SH2D1B/NCR3/RAET1E/HLA-G/RAET1G/KLRC4-KLRK1
GO:0001637	G protein-coupled chemoattractant receptor activity	19/2173	19	MF	25/16967	8.41259e-13	1.01862e-10	CCR5/CCR2/CCR8/CXCR6/CCR4/CCR1/CCR3/CXCR3/CMKLR1/CCR9/XCR1/CCRL2/CCR6/CXCR4/CX3CR1/CXCR2/CCR7/CXCR1/CXCR5
GO:0004950	chemokine receptor activity	19/2173	19	MF	25/16967	8.41259e-13	1.01862e-10	CCR5/CCR2/CCR8/CXCR6/CCR4/CCR1/CCR3/CXCR3/CMKLR1/CCR9/XCR1/CCRL2/CCR6/CXCR4/CX3CR1/CXCR2/CCR7/CXCR1/CXCR5
GO:0030097	hemopoiesis	182/2341	182	BP	847/17910	2.54892e-12	1.17788e-10	STAT1/THEMIS/UBD/IRF1/IFNG/PTPN22/GPR171/B2M/PTPRC/RSAD2/CD80/CYLD/PTGER4/LILRB1/CD86/PLEK/HEATR9/CCR2/RASGRP1/FCRL3/CD2/IL2RA/HLA-DOA/GAB3/IKZF3/TLR3/BATF2/JAK2/HERC6/TBX21/PSMB9/LYN/EVI2B/IRF8/LILRB2/CD28/ARL11/VCAM1/LAG3/RHOH/FLI1/DOCK2/SLAMF6/IL27/TLR4/IL7/NCKAP1L/GPR18/IL12RB1/IL7R/PSMB8/IL15/TESPA1/IKZF1/PLA2G2D/DOCK11/BTK/PSME2/EEF2/RPS19/TLR2/CD27/CD3D/CCR1/PRDM1/IL12B/PLCL2/SPTA1/VNN1/HC…
GO:0036230	granulocyte activation	123/2341	123	BP	506/17910	2.56687e-12	1.17979e-10	B2M/PTPRC/CYBB/MNDA/CTSS/CCL5/CCR2/LRMP/IL18RAP/ATP8B4/SLPI/BIN2/LILRB2/LYZ/FPR2/FLG2/DOCK2/CD53/NCKAP1L/ARHGAP9/IL15/EEF2/KRT1/TLR2/PKP1/CLEC12A/RAB3A/VNN1/IMPDH2/FGL2/DPP7/RAB37/PLAC8/DSP/TBC1D10C/S100A7/C3AR1/GPI/CR1/S100P/S100A8/ITGAL/APRT/HK3/S100A9/LILRB3/SLC2A5/AGPAT2/JUP/LAIR1/GPR84/ARG1/HRNR/FCN1/CDA/CLEC4C/SLC27A2/TICAM2/SIGLEC5/CALML5/IL18/GLIPR1/CLEC4D/HLA-H/ADA2/GMFG/SELL/CD33/PTAFR/…
GO:0002819	regulation of adaptive immune response	53/2341	53	BP	150/17910	2.64592e-12	1.20962e-10	CD274/IRF1/SAMSN1/B2M/PTPRC/RSAD2/CD80/LILRB1/CCR2/TBX21/CD226/CD48/HAVCR2/CD28/HLA-F/IL27/TNFSF13B/IL12RB1/HLA-E/IL7R/BTK/IL12B/CD160/XCL1/TNF/PRKCQ/CR1/NLRP3/ARG1/IL33/LTA/IL18/SASH3/JAK3/TNFRSF1B/PTPN6/IL18R1/TNFSF4/WAS/IL20RB/CD4/FOXJ1/IL23R/FCGR2B/FCER2/IL10/SKAP1/HLA-G/C3/IL1B/GATA3/ALOX15/CCL19
GO:0002700	regulation of production of molecular mediator of immune response	50/2341	50	BP	138/17910	3.72299e-12	1.69297e-10	B2M/PTPRC/RSAD2/LILRB1/DDX58/CCR2/FCRL3/TLR3/TBX21/CD96/CD28/HLA-F/TLR4/HLA-E/BTK/CD244/KIR2DL4/KLK5/CD160/XCL1/GPI/TNF/CGAS/SPINK5/MZB1/CD74/NLRP3/ARG1/KLK7/IL33/IL18/SASH3/JAK3/TNFRSF1B/IL18R1/TNFSF4/MIF/NOD2/BST2/FCGR2B/CD40LG/APOA1/IL10/HLA-G/RAET1G/IL1B/GATA3/RBP4/IL13/APOA2
GO:0004888	transmembrane signaling receptor activity	226/2173	226	MF	1133/16967	1.5814e-12	1.76751e-10	GPR171/GPR65/PTPRC/OR2I1P/KLRD1/CD69/CCR5/P2RY10/PTGER4/LILRB1/TLR8/GRIN3A/CD3G/FCGR1B/TRGC2/CYSLTR1/TLR7/KRT17/CCR2/CD72/GPR174/SLAMF1/CCR8/IL2RA/HLA-DOA/IL18RAP/IL15RA/IGSF6/TLR3/KLRC1/P2RY12/HLA-DRA/CXCR6/TLR10/EFNA3/CSF2RB/P2RY14/LILRB2/GPR82/CD200R1/FPR2/LAG3/GPR31/TLR4/GPR18/IL12RB1/EBI3/IL7R/IL2RB/HLA-DPA1/CLEC2D/CLEC4A/OR52N4/TLR1/CD27/CD3D/GPR34/CCR4/IL21R/SEMA4D/CCR1/TSHR/GPBAR1/HLA-DQA…
GO:0002688	regulation of leukocyte chemotaxis	42/2341	42	BP	105/17910	4.61159e-12	2.08359e-10	CXCL10/CCL5/CCL4/CCR2/CXCL13/LYN/AIF1/FPR2/NCKAP1L/GPR18/S100A14/CCR1/TNFSF14/STAP1/S100A7/C3AR1/XCL1/CMKLR1/KLRK1/SLAMF8/CD74/CSF1/CCL2/CCL7/LGMN/MIF/CCL3/RAC2/EDN3/LGALS9/F7/CXCL12/CXCR2/EDN2/RIPOR2/CCR7/PLA2G7/KLRC4-KLRK1/CCL1/CYP19A1/CXCL14/CCL19
GO:0042119	neutrophil activation	121/2341	121	BP	499/17910	4.63074e-12	2.08359e-10	B2M/PTPRC/CYBB/MNDA/CTSS/CCL5/LRMP/IL18RAP/ATP8B4/SLPI/BIN2/LILRB2/LYZ/FPR2/FLG2/DOCK2/CD53/NCKAP1L/ARHGAP9/IL15/EEF2/KRT1/TLR2/PKP1/CLEC12A/RAB3A/VNN1/IMPDH2/FGL2/DPP7/RAB37/PLAC8/DSP/TBC1D10C/S100A7/C3AR1/GPI/CR1/S100P/S100A8/ITGAL/APRT/HK3/S100A9/LILRB3/SLC2A5/AGPAT2/JUP/LAIR1/GPR84/ARG1/HRNR/FCN1/CDA/CLEC4C/SLC27A2/TICAM2/SIGLEC5/CALML5/IL18/GLIPR1/CLEC4D/HLA-H/ADA2/GMFG/SELL/CD33/PTAFR/RNASE…
GO:0002367	cytokine production involved in immune response	41/2341	41	BP	101/17910	4.6837e-12	2.09638e-10	B2M/RSAD2/LILRB1/DDX58/CCR2/IL18RAP/TLR3/TBX21/CD96/HLA-F/TLR4/HLA-E/BTK/TLR2/IL12B/KIR2DL4/CD160/XCL1/TNF/CD74/NLRP3/ARG1/IL18/SASH3/JAK3/TNFRSF1B/IL18R1/DENND1B/TNFSF4/MIF/NOD2/BST2/APOA1/KIT/IL10/HLA-G/RAET1G/IL1B/GATA3/INAVA/APOA2
GO:0030246	carbohydrate binding	74/2173	74	MF	252/16967	2.16532e-12	2.2473e-10	KLRD1/CD69/CLEC7A/CLECL1/LY75/CD72/KLRC1/BSG/CLEC9A/CLEC6A/KRT1/CLEC2D/CLEC4A/CLEC12A/SIGLEC11/NECTIN1/CLEC4E/KLRB1/MRC1/SIGLEC10/LGALS7B/DBH/CRYBG2/KLRK1/HK3/SIGLEC6/SIGLEC1/GYS1/SLC2A5/SIGLEC16/FCN1/CLEC4C/KLRG1/SIGLEC5/CLEC4D/CLEC10A/SELL/CD33/KLRG2/SFTPD/LGALS2/CLEC11A/SIGLEC14/P3H3/SIGLEC9/CLEC2B/OLR1/PKD1L3/ENDOU/C4B/CLEC17A/LGALS9/ACAN/CD209/SIGLEC8/SIGLEC7/KLRF1/FCER2/CLEC5A/CD207/EVA1C/C…
GO:0009967	positive regulation of signal transduction	300/2341	300	BP	1591/17910	5.10557e-12	2.27331e-10	PARP14/UBD/DDX60/TRIM22/SH2D1A/PARP9/IFNG/PTPN22/TRAT1/PTPRC/APOL3/RSAD2/BIRC3/PYHIN1/ICOS/CD80/FASLG/CYLD/NLRC5/CLNK/CD3G/CD86/CDC42SE2/TNFSF10/CCL5/TLR7/SLA/CCL4/CCR2/RASGRP1/IFIT5/FCRL3/SLAMF1/TLR3/JAK2/P2RY12/CD226/PIK3CG/PIK3AP1/PSMB9/LYN/HAVCR2/IL10RA/CD28/SFN/ALOX12B/FPR2/SLA2/TLR4/IL7/IL7R/PSMB8/UBA52/PIK3R2/MLKL/SCIMP/IL15/TESPA1/CLEC6A/PSME2/TLR2/TLR1/GZMB/CD27/TIFA/SEMA4D/MLST8/FGD2/CC…
GO:0098802	plasma membrane receptor complex	53/2436	53	CC	153/18675	5.97734e-12	2.38054e-10	TRAT1/B2M/GRIN3A/CD3G/CD8A/IL2RA/IL18RAP/LYN/CSF2RB/CD8B/IL12RB1/IL2RB/TLR2/TLR1/CD3D/ITGAD/CD247/APBB1IP/ITGAL/CD6/CNIH2/SHANK1/IFNL1/CD3E/PTPN6/IL18R1/ITGB2/OLFM2/ITGB7/ITGAM/CD4/TFR2/CHRNA3/IL23R/TSPAN32/ZAP70/CHRNA9/ITGB6/CD79A/SHANK2/SKAP1/CHRNB4/GRIN1/CACNG8/GRIA4/CACNG4/ITGB8/CHRNB2/GABBR2/CNTFR/RAMP1/CHRNA4/HJV
GO:0048869	cellular developmental process	666/2341	666	BP	4088/17910	5.98284e-12	2.65012e-10	GBP1/STAT1/CXCL10/THEMIS/UBD/IRF1/CXCL9/IFNG/PTPN22/GPR171/B2M/PTPRC/RSAD2/CD80/FASLG/CYLD/PTGER4/LILRB1/GRIN3A/CD86/CD38/CDC42SE2/PLEK/KRT17/SOD2/HEATR9/CCR2/RASGRP1/ERAP1/FCRL3/CD2/IL2RA/HLA-DOA/GAB3/IKZF3/TLR3/BATF2/JAK2/MSR1/HERC6/SLC8A1/TBX21/P2RY12/KRT10/PSMB9/LYN/EVI2B/IRF8/EFNA3/NSMF/NEUROG3/LILRB2/CD28/SFN/FPR2/ARL11/PI3/VCAM1/LAG3/RHOH/MIAT/FLI1/KRTDAP/DOCK2/SLAMF6/CNFN/CD53/KRT6B/IL27/…
GO:0009615	response to virus	88/2341	88	BP	323/17910	6.05593e-12	2.66867e-10	GBP1/STAT1/CXCL10/IFI44L/DDX60/IFIH1/TRIM22/DTX3L/IRF1/PARP9/CXCL9/IFNG/IFIT3/IFIT2/PTPRC/RSAD2/GBP3/BIRC3/CCL8/NLRC5/LILRB1/DDX58/TLR8/SAMHD1/CCL5/TLR7/IFI44/CCL4/IFIT5/IL2RA/TLR3/APOBEC3G/TBX21/OAS2/IFIT1/PRF1/OAS1/IL27/IL12RB1/IL15/IRF9/TRIM34/OASL/IL12B/IFITM1/APOBEC3D/FGL2/SLFN11/AIM2/OAS3/XCL1/RTP4/TNF/CGAS/EXOSC4/EEF1G/MX1/NLRP3/PIM2/IL33/DHX58/HSPB1/IFNL1/RNASE2/NLRX1/APOBEC3A/APOBEC3F/TN…
GO:0023051	regulation of signaling	601/2341	601	BP	3635/17910	7.71998e-12	3.38452e-10	GBP1/STAT1/CXCL10/CXCL11/PARP14/AKAP5/UBD/DDX60/TRIM22/SH2D1A/IRF1/PARP9/CXCL9/IFNG/PTPN22/TRAT1/PTPRC/APOL3/RSAD2/TNIP3/BIRC3/PYHIN1/CCL8/ICOS/CD80/FASLG/CYLD/NLRC5/RGS18/GRIN3A/CLNK/CD3G/SAMHD1/CD86/CD38/CDC42SE2/TNFSF10/CCL5/PLEK/LAX1/TLR7/ACOD1/SLA/SOD2/CCL4/NLRC3/CCR2/CXCL13/RASGRP1/XCL2/IFIT5/FCRL3/SLAMF1/TLR3/JAK2/SP100/TAGAP/SLC8A1/P2RY12/CD226/CLIC2/PIK3CG/PIK3AP1/PSMB9/LYN/RNF213/TNFSF8…
GO:0006928	movement of cell or subcellular component	363/2341	363	BP	2012/17910	9.58491e-12	4.16249e-10	CXCL10/CXCL11/CD274/PARP9/IFNG/PTPRC/CCL8/CCR5/PTGER4/DDX58/CCL5/SOD2/CCL4/CCR2/CXCL13/RASGRP1/CD84/CD2/JAK2/SP100/SLC8A1/TBX21/P2RY12/PIK3CG/LYN/BIN2/CD48/NSMF/S100A2/AIF1/CD200R1/FPR2/IGKV2-29/VCAM1/DOCK8/IGKV4-1/NCKAP1L/GPR18/BSG/EPPK1/S100A14/RAB25/PIK3R2/GCNT1/PSTPIP2/IGLV3-19/CASS4/JCHAIN/IGHV3-23/RPS19/KRT2/CCR4/SEMA4D/CCR1/TNFSF14/NECTIN1/IL12B/IGLV2-11/IFITM1/ARHGAP18/IGKV1-16/CD244/SPTA…
GO:0042113	B cell activation	66/2341	66	BP	215/17910	9.5919e-12	4.16249e-10	SAMSN1/PTPRC/CYLD/MNDA/CD38/LAX1/FCRL3/IKZF3/TBX21/CD28/VCAM1/SLA2/TLR4/IL7/TNFSF13B/NCKAP1L/IL7R/DOCK11/BTK/CD27/BANK1/PLCL2/GPR183/FLT3/FCRL1/LAT2/MZB1/SLAMF8/CD74/MS4A1/INPP5D/CARD11/POU2F2/PRKCB/JAK3/CD300A/PTPN6/TYROBP/TNFSF4/AICDA/WNT3A/MIF/NOD2/BLNK/PLCG2/VAV3/FOXJ1/FZD9/BST2/CCR6/FCGR2B/ZAP70/CD40LG/NFAM1/CD19/CD79A/ITM2A/KIT/IL10/CTLA4/IL11/CR2/CHRNB2/CXCR5/IL13/CHRNA4
GO:0006935	chemotaxis	129/2341	129	BP	551/17910	1.22453e-11	5.26166e-10	CXCL10/CXCL11/CXCL9/CCL8/CCR5/CYSLTR1/CCL5/CCL4/CCR2/CXCL13/P2RY12/PIK3CG/LYN/BIN2/AIF1/FPR2/VCAM1/DOCK2/NCKAP1L/GPR18/S100A14/RPS19/FPR3/CCR4/CCR1/TNFSF14/NECTIN1/SPTA1/STAP1/GPR183/VAV1/S100A7/C3AR1/CXCR3/XCL1/CMKLR1/PRKCQ/TMSB4X/S100A8/CSF1R/KLRK1/CCL25/SLAMF8/CD74/S100A9/JAML/CSF1/SPN/DEFB1/CCL2/CCL7/SPTBN2/HSPB1/SUCNR1/DCC/LGMN/PTAFR/RNASE2/DPYSL5/CORO1A/SFTPD/ITGB2/GRB7/FGF1/WNT3A/PTPRO/GST…
GO:0032945	negative regulation of mononuclear cell proliferation	31/2341	31	BP	65/17910	1.23094e-11	5.26166e-10	PDCD1LG2/IDO1/CD274/MNDA/LILRB1/IL2RA/HAVCR2/LILRB2/BTK/GAL/XCL1/MAD1L1/INPP5D/LST1/ARG1/SPN/VSIG4/CD300A/PTPN6/SFTPD/TYROBP/IL20RB/FOXJ1/LGALS9/FCGR2B/SOX11/IL10/IHH/HLA-G/CTLA4/VTCN1
GO:0050672	negative regulation of lymphocyte proliferation	31/2341	31	BP	65/17910	1.23094e-11	5.26166e-10	PDCD1LG2/IDO1/CD274/MNDA/LILRB1/IL2RA/HAVCR2/LILRB2/BTK/GAL/XCL1/MAD1L1/INPP5D/LST1/ARG1/SPN/VSIG4/CD300A/PTPN6/SFTPD/TYROBP/IL20RB/FOXJ1/LGALS9/FCGR2B/SOX11/IL10/IHH/HLA-G/CTLA4/VTCN1
GO:0071219	cellular response to molecule of bacterial origin	59/2341	59	BP	183/17910	1.28777e-11	5.47721e-10	CXCL10/PTPN22/TNIP3/CCR5/LILRB1/CCL5/ACOD1/LYN/IRF8/NUGGC/HAVCR2/LILRB2/CMPK2/TLR4/TLR2/TLR1/IL12B/STAP1/MRC1/TNF/KLRK1/NLRP3/KMO/PPARD/HCK/ARG1/NLRP7/CD6/TICAM2/TLR6/CCL2/IL18/CD180/LY86/PTAFR/TNFRSF1B/TNFSF4/IRAK2/AICDA/GSTP1/MIF/NOD2/CCL3/CARD17/GFI1/LILRA2/FCGR2B/NOS3/CX3CR1/LCN2/IL10/ASS1/NOS2/AXL/HAMP/IL1B/KLRC4-KLRK1/ANKRD1/CTSG
GO:1904894	positive regulation of STAT cascade	37/2341	37	BP	88/17910	1.47287e-11	6.23345e-10	PARP14/PARP9/IFNG/CCL5/JAK2/LYN/IL10RA/IL7R/IL15/IL12B/HCLS1/FLT3/TNF/CSF1R/SOCS1/CRLF1/IL18/IFNL1/TNFSF18/CD300A/EPO/FGFR3/CYP1B1/IL26/PTK6/IL23R/KIT/IL10/TSLP/IL31RA/LIF/LEP/IL13/AGT/PRLR/IL20/F2
GO:1903530	regulation of secretion by cell	155/2341	155	BP	703/17910	1.51655e-11	6.38671e-10	GBP1/CD274/IFIH1/IFNG/PTPN22/CRTAM/RSAD2/SRGN/PTGER4/LILRB1/DDX58/TLR8/GRIN3A/CD38/CCL5/CCR2/RASGRP1/CD84/CD2/JAK2/P2RY12/LYN/TLR10/HAVCR2/AIF1/HLA-F/CD200R1/TLR4/HLA-E/CLEC9A/CLEC6A/TLR2/TLR1/BANK1/RAB8B/RAB3A/GAL/CD244/CLEC4E/FFAR4/CD160/AIM2/GPI/TNF/CPLX1/TMSB4X/LRRK2/CSF1R/CBARP/NLRP3/NCS1/KMO/PPARD/FCN1/PAEP/NLRP7/SOCS1/IL33/TLR6/SEPTIN5/PRKCB/CD33/PTAFR/TNFRSF1B/FERMT1/CD300A/C1QTNF12/ASIC1…
GO:0008544	epidermis development	111/2341	111	BP	452/17910	1.55847e-11	6.53106e-10	KRT17/KRT10/SFN/FLG2/PI3/CNFN/KRT6B/TGM1/KRT1/KRT2/PKP1/ABCA12/FLG/KRT14/COL17A1/SULT2B1/EVPL/KRT5/GAL/KRT16/GJB5/KLK5/DSC3/APCDD1/POU2F3/DSP/S100A7/CERS3/CASP14/KRT6A/JAG2/TNF/ZNF750/MYO7A/FOXQ1/SPINK5/KLK13/PPL/CST6/KRT6C/AGPAT2/JUP/PPARD/HRNR/PRKCH/KLK7/SPRR1B/CRABP2/CALML5/KDF1/PRSS8/FERMT1/SPRR1A/PKP3/DSG1/GRHL2/IVL/DSC1/ACER1/GRHL3/SPRR2E/CDH3/WAS/KRT80/FABP5/LGR5/BNC1/SPRR2A/GRHL1/ELF3/KLK…
GO:0042330	taxis	129/2341	129	BP	553/17910	1.5936e-11	6.6457e-10	CXCL10/CXCL11/CXCL9/CCL8/CCR5/CYSLTR1/CCL5/CCL4/CCR2/CXCL13/P2RY12/PIK3CG/LYN/BIN2/AIF1/FPR2/VCAM1/DOCK2/NCKAP1L/GPR18/S100A14/RPS19/FPR3/CCR4/CCR1/TNFSF14/NECTIN1/SPTA1/STAP1/GPR183/VAV1/S100A7/C3AR1/CXCR3/XCL1/CMKLR1/PRKCQ/TMSB4X/S100A8/CSF1R/KLRK1/CCL25/SLAMF8/CD74/S100A9/JAML/CSF1/SPN/DEFB1/CCL2/CCL7/SPTBN2/HSPB1/SUCNR1/DCC/LGMN/PTAFR/RNASE2/DPYSL5/CORO1A/SFTPD/ITGB2/GRB7/FGF1/WNT3A/PTPRO/GST…
GO:0046427	positive regulation of JAK-STAT cascade	36/2341	36	BP	85/17910	2.14585e-11	8.90529e-10	PARP14/PARP9/IFNG/CCL5/JAK2/LYN/IL10RA/IL15/IL12B/HCLS1/FLT3/TNF/CSF1R/SOCS1/CRLF1/IL18/IFNL1/TNFSF18/CD300A/EPO/FGFR3/CYP1B1/IL26/PTK6/IL23R/KIT/IL10/TSLP/IL31RA/LIF/LEP/IL13/AGT/PRLR/IL20/F2
GO:0005126	cytokine receptor binding	64/2173	64	MF	210/16967	1.12538e-11	1.09011e-09	STAT1/CXCL10/CXCL11/CXCL9/IFNG/FASLG/TNFSF10/CCL5/CCL4/CCR2/CXCL13/ERAP1/JAK2/TNFSF8/IL27/IL7/TNFSF13B/IL12RB1/S100A14/IL15/TNFSF14/IL12B/STAP1/XCL1/TNF/CCL25/CCRL2/CSF1/RHEX/CRLF1/DEFB1/CCL2/LTA/CCL7/IL18/IFNL1/TNFSF18/EPO/TNFSF4/TNFSF15/CD300LF/MIF/CCL3/IL23R/CXCL12/CD40LG/TNFSF11/IL37/CD70/IL36RN/IL10/IL1B/TSLP/LTB/CCL1/GATA3/PF4/IL11/LIF/IL13/IL36B/CXCL14/CCL19/IL20
GO:0002685	regulation of leukocyte migration	59/2341	59	BP	186/17910	2.72435e-11	1.12514e-09	CXCL10/CCL8/PTGER4/CCL5/CCL4/CCR2/CXCL13/P2RY12/LYN/AIF1/CD200R1/FPR2/DOCK8/NCKAP1L/GPR18/S100A14/CCR1/TNFSF14/STAP1/S100A7/C3AR1/CXCR3/XCL1/CMKLR1/TNF/KLRK1/CCL25/SLAMF8/CD74/CSF1/SPN/IL33/CCL2/CCL7/LGMN/PTAFR/TNFSF18/CD300A/MIF/CCL3/GCSAM/RAC2/EDN3/CCR6/LGALS9/F7/CXCL12/CX3CR1/ADAM8/CXCR2/EDN2/RIPOR2/CCR7/PLA2G7/KLRC4-KLRK1/CCL1/CYP19A1/CXCL14/CCL19
GO:0051046	regulation of secretion	163/2341	163	BP	757/17910	3.18859e-11	1.31054e-09	GBP1/CD274/IFIH1/IFNG/PTPN22/CRTAM/RSAD2/SRGN/PTGER4/LILRB1/DDX58/TLR8/GRIN3A/CD38/CCL5/CCR2/RASGRP1/CD84/CD2/JAK2/OAS2/P2RY12/LYN/TLR10/HAVCR2/AIF1/HLA-F/CD200R1/ALOX12B/TLR4/HLA-E/CLEC9A/CLEC6A/TLR2/TLR1/BANK1/RAB8B/RAB3A/GAL/CD244/CLEC4E/FFAR4/CD160/AIM2/GPI/TNF/CPLX1/TMSB4X/S100A8/LRRK2/CSF1R/CBARP/CD74/NLRP3/TIFAB/NCS1/KMO/PPARD/FCN1/PAEP/NLRP7/SOCS1/IL33/TLR6/SEPTIN5/PRKCB/CD33/PTAFR/TNFRSF…
GO:0042613	MHC class II protein complex	14/2436	14	CC	16/18675	3.70471e-11	1.37835e-09	HLA-DOA/HLA-DRA/HLA-DMB/HLA-DPA1/HLA-DRB1/HLA-DQA2/HLA-DPB1/HLA-DOB/HLA-DQA1/CD74/HLA-DQB1/HLA-DMA/HLA-DRB5/HLA-DQB2
GO:0043235	receptor complex	80/2436	80	CC	292/18675	3.76186e-11	1.37835e-09	TRAT1/B2M/KLRD1/GRIN3A/CD3G/CD8A/TLR7/IL2RA/IL18RAP/KLRC1/CR1L/LYN/CSF2RB/CD200R1/CD8B/TLR4/IL12RB1/IL2RB/TLR2/TLR1/CD3D/ITGAD/TSHR/CD247/APBB1IP/ITGAL/TM7SF2/CD74/LRP5/GPR84/CD6/TLR6/FCRL5/CNIH2/SHANK1/IFNL1/TNFRSF1B/CD3E/PTPN6/IL18R1/ITGB2/OLFM2/PTH1R/ITGB7/ITGAM/OLR1/PKD1L3/MTTP/CD4/TFR2/NOTCH3/CHRNA3/IL23R/TSPAN32/ZAP70/CHRNA9/ITGB6/CD79A/SHANK2/ADCYAP1R1/GRM7/SKAP1/CHRNB4/GRIN1/NPR1/VIPR1/CA…
GO:0050853	B cell receptor signaling pathway	27/2341	27	BP	53/17910	3.71296e-11	1.51876e-09	PTPN22/PTPRC/MNDA/CD38/FCRL3/LYN/NCKAP1L/BTK/PLCL2/STAP1/KLHL6/LAT2/MS4A1/PRKCH/PRKCB/CD300A/PTPN6/PLCG2/GCSAM/VAV3/FCGR2B/NFAM1/CD19/CD79A/CTLA4/PAX5/BLK
GO:0042100	B cell proliferation	32/2341	32	BP	71/17910	3.79514e-11	1.54498e-09	PTPRC/MNDA/CD38/FCRL3/IKZF3/TLR4/IL7/TNFSF13B/NCKAP1L/IL7R/BTK/PLCL2/GPR183/MZB1/CD74/MS4A1/INPP5D/CARD11/CD300A/TYROBP/WNT3A/MIF/VAV3/FCGR2B/CD40LG/CD19/CD79A/IL10/CTLA4/CR2/CHRNB2/IL13
GO:0042127	regulation of cell proliferation	307/2341	307	BP	1664/17910	3.92301e-11	1.58947e-09	STAT1/CXCL10/CXCL11/PDCD1LG2/IDO1/CD274/IRF1/CXCL9/IFNG/PTPN22/IFIT3/PTPRC/CCL8/TNFRSF9/FASLG/MNDA/PLAAT4/LILRB1/CLECL1/CD86/CD38/CCL5/SOD2/NLRC3/CCR2/FCRL3/SLAMF1/IL2RA/IKZF3/JAK2/EAF2/LYN/TNFSF8/HAVCR2/WARS1/LILRB2/CD28/AIF1/SFN/VCAM1/IL27/TLR4/IL7/TNFSF13B/NCKAP1L/HLA-DMB/IL12RB1/HLA-E/EPPK1/EBI3/IL7R/HLA-DPA1/RAB25/TGM1/IL15/BTK/TLR2/BNIPL/SULT2B1/PRDM1/IL12B/SSTR2/TSHR/IFITM1/CCR3/RPS3/GAL/S…
GO:0002718	regulation of cytokine production involved in immune response	35/2341	35	BP	83/17910	4.71487e-11	1.90129e-09	B2M/RSAD2/LILRB1/DDX58/CCR2/TLR3/TBX21/CD96/HLA-F/TLR4/HLA-E/BTK/KIR2DL4/CD160/XCL1/TNF/CD74/NLRP3/ARG1/IL18/SASH3/JAK3/TNFRSF1B/IL18R1/TNFSF4/MIF/NOD2/BST2/APOA1/IL10/HLA-G/RAET1G/IL1B/GATA3/APOA2
GO:0002283	neutrophil activation involved in immune response	116/2341	116	BP	488/17910	4.96161e-11	1.9914e-09	B2M/PTPRC/CYBB/MNDA/CTSS/LRMP/ATP8B4/SLPI/BIN2/LILRB2/LYZ/FPR2/FLG2/DOCK2/CD53/NCKAP1L/ARHGAP9/EEF2/KRT1/TLR2/PKP1/CLEC12A/RAB3A/VNN1/IMPDH2/FGL2/DPP7/RAB37/PLAC8/DSP/TBC1D10C/S100A7/C3AR1/GPI/CR1/S100P/S100A8/ITGAL/APRT/HK3/S100A9/LILRB3/SLC2A5/AGPAT2/JUP/LAIR1/GPR84/ARG1/HRNR/FCN1/CDA/CLEC4C/SLC27A2/TICAM2/SIGLEC5/CALML5/GLIPR1/CLEC4D/HLA-H/ADA2/GMFG/SELL/CD33/PTAFR/RNASE2/TNFRSF1B/CD300A/PTPN6…
GO:0045055	regulated exocytosis	164/2341	164	BP	768/17910	5.46825e-11	2.18449e-09	B2M/PTPRC/CYBB/MNDA/SRGN/GRIN3A/CTSS/PLEK/CCR2/RASGRP1/LRMP/CD84/ATP8B4/SLPI/PIK3CG/LYN/BIN2/LILRB2/LYZ/HLA-F/FPR2/FLG2/DOCK2/CD53/NCKAP1L/ARHGAP9/BTK/CTSW/EEF2/KRT1/TLR2/PKP1/ABCA12/CLEC12A/RAB3A/VNN1/IMPDH2/FGL2/DPP7/RAB37/PLAC8/DSP/TBC1D10C/S100A7/C3AR1/GPI/LAT2/CPLX1/CR1/TMSB4X/S100P/S100A8/ITGAL/LRRK2/APRT/CBARP/HK3/S100A9/LILRB3/SLC2A5/AGPAT2/JUP/NCS1/LAIR1/GPR84/HCK/ARG1/HRNR/FCN1/CDA/CLEC…
GO:1902107	positive regulation of leukocyte differentiation	49/2341	49	BP	143/17910	6.17742e-11	2.45631e-09	IFNG/PTPRC/CD80/CYLD/CD86/RASGRP1/IL2RA/EVI2B/LILRB2/IL7/NCKAP1L/IL12RB1/IL7R/IL15/TESPA1/BTK/CD27/CCR1/IL12B/VNN1/HCLS1/TNF/TOX/CD74/LILRB4/INPP5D/NLRP3/CSF1/SOCS1/IL18/SASH3/TYROBP/TNFSF4/CD4/PIK3R6/IL23R/LGALS9/ZAP70/TNFSF11/ADAM8/IHH/HLA-G/AXL/GATA3/PF4/LIF/POU4F1/CCL19/IL20
GO:0042107	cytokine metabolic process	44/2341	44	BP	121/17910	6.2854e-11	2.48768e-09	IRF1/PTPRC/CD80/CYBB/NMI/LILRB1/TLR8/CD86/TLR7/CCR2/TLR3/CD28/LAG3/IL27/TLR4/EBI3/TLR1/IL12B/TNF/PRKCQ/INPP5D/CARD11/SPN/TLR6/IL18/HSPB1/PTAFR/CD3E/SFTPD/TYROBP/TNFSF15/GHRL/CD4/EREG/FOXJ1/CX3CR1/IL10/RNF128/IL1B/LTB/GATA3/IGF2BP1/APOA2/CMA1
GO:0050852	T cell receptor signaling pathway	57/2341	57	BP	180/17910	6.3438e-11	2.49922e-09	GBP1/THEMIS/PTPN22/TRAT1/PTPRC/BTN3A1/FYB1/CYLD/CD3G/ITK/CD226/PSMB9/HLA-DRA/HLA-DPA1/PSMB8/PIK3R2/TESPA1/PSME2/HLA-DRB1/CD3D/TRAV19/HLA-DQA2/CD247/RPS3/HLA-DPB1/LCK/CD160/LCP2/HLA-DQA1/TRAV29DV5/PRKCQ/TRAC/LILRB4/TRBC1/INPP5D/PSMB10/HLA-DQB1/CARD11/HLA-DRB5/TRBV7-9/TRBV12-3/CD3E/CD300A/PTPN6/DENND1B/TRAV8-4/WAS/TXK/PLCG2/CD4/GRAP2/HLA-DQB2/ZAP70/SKAP1/CCR7/GATA3/PSMA8
GO:0043588	skin development	102/2341	102	BP	412/17910	6.37647e-11	2.50057e-09	KRT17/KRT10/SFN/ALOX12B/FLG2/PI3/ASPRV1/CNFN/KRT6B/TGM1/KRT1/KRT2/PKP1/ABCA12/FLG/KRT14/EVPL/KRT5/GAL/KRT16/KLK5/DSC3/APCDD1/DSP/S100A7/CERS3/CASP14/KRT6A/TNF/FOXQ1/SPINK5/KLK13/PPL/KRT6C/ALOXE3/JUP/SLC27A4/HRNR/PRKCH/SPRR1B/CLDN4/OVOL1/KDF1/PRSS8/FERMT1/SPRR1A/PKP3/DSG1/GRHL2/IVL/DSC1/ACER1/GRHL3/SPRR2E/CDH3/KRT80/LGR5/SPRR2A/GRHL1/KLK14/EREG/KRT15/BCL11B/OVOL2/GJB3/TCF15/CSTA/DSC2/FGFR2/DNASE1L…
GO:0008283	cell proliferation	352/2341	352	BP	1969/17910	6.95992e-11	2.71691e-09	STAT1/CXCL10/CXCL11/PDCD1LG2/IDO1/CD274/IRF1/CXCL9/IFNG/PTPN22/IFIT3/PTPRC/BTN3A1/CCL8/TNFRSF9/FASLG/MNDA/PLAAT4/LILRB1/CLECL1/CD86/CD38/CCL5/SOD2/NLRC3/CCR2/FCRL3/SLAMF1/IL2RA/IL18RAP/IKZF3/JAK2/EAF2/PIK3CG/LYN/TNFSF8/HAVCR2/WARS1/LILRB2/CD28/AIF1/SFN/VCAM1/DOCK2/IL27/DOCK8/TLR4/IL7/TNFSF13B/NCKAP1L/HLA-DMB/IL12RB1/HLA-E/EPPK1/EBI3/IL7R/HLA-DPA1/RAB25/TGM1/IL15/BTK/EEF2/TLR2/KRT2/BNIPL/SULT2B1/T…
GO:0043312	neutrophil degranulation	115/2341	115	BP	485/17910	7.0956e-11	2.75728e-09	B2M/PTPRC/CYBB/MNDA/CTSS/LRMP/ATP8B4/SLPI/BIN2/LILRB2/LYZ/FPR2/FLG2/DOCK2/CD53/NCKAP1L/ARHGAP9/EEF2/KRT1/TLR2/PKP1/CLEC12A/RAB3A/VNN1/IMPDH2/FGL2/DPP7/RAB37/PLAC8/DSP/TBC1D10C/S100A7/C3AR1/GPI/CR1/S100P/S100A8/ITGAL/APRT/HK3/S100A9/LILRB3/SLC2A5/AGPAT2/JUP/LAIR1/GPR84/ARG1/HRNR/FCN1/CDA/CLEC4C/SLC27A2/TICAM2/SIGLEC5/CALML5/GLIPR1/CLEC4D/HLA-H/ADA2/GMFG/SELL/CD33/PTAFR/RNASE2/TNFRSF1B/CD300A/PTPN6…
GO:0071222	cellular response to lipopolysaccharide	56/2341	56	BP	176/17910	7.56734e-11	2.92729e-09	CXCL10/PTPN22/TNIP3/CCR5/LILRB1/CCL5/ACOD1/LYN/IRF8/NUGGC/HAVCR2/LILRB2/CMPK2/TLR4/TLR2/IL12B/STAP1/MRC1/TNF/KLRK1/NLRP3/KMO/PPARD/HCK/ARG1/NLRP7/CD6/TICAM2/CCL2/IL18/CD180/LY86/PTAFR/TNFRSF1B/TNFSF4/IRAK2/AICDA/GSTP1/MIF/NOD2/CCL3/CARD17/GFI1/LILRA2/NOS3/CX3CR1/LCN2/IL10/ASS1/NOS2/AXL/HAMP/IL1B/KLRC4-KLRK1/ANKRD1/CTSG
GO:0002822	regulation of adaptive immune response based on somatic recombination of immune receptors built from immunoglobulin superfamily domains	47/2341	47	BP	135/17910	8.10196e-11	3.11999e-09	CD274/B2M/PTPRC/RSAD2/CD80/LILRB1/CCR2/TBX21/CD226/HAVCR2/CD28/HLA-F/IL27/TNFSF13B/IL12RB1/HLA-E/IL7R/BTK/IL12B/XCL1/TNF/PRKCQ/CR1/NLRP3/ARG1/IL33/LTA/IL18/SASH3/JAK3/TNFRSF1B/PTPN6/IL18R1/TNFSF4/WAS/IL20RB/CD4/FOXJ1/IL23R/FCGR2B/FCER2/IL10/HLA-G/C3/IL1B/GATA3/CCL19
GO:0051049	regulation of transport	322/2341	322	BP	1773/17910	8.24153e-11	3.1595e-09	GBP1/CXCL10/CXCL11/CD274/IFIH1/CXCL9/IFNG/PTPN22/CRTAM/TRAT1/B2M/PTPRC/RSAD2/CYBB/SRGN/PTGER4/LILRB1/DDX58/TLR8/GRIN3A/CTSS/CD38/CCL5/CCL4/CCR2/RASGRP1/FCRL3/CD84/CD2/IL15RA/JAK2/SP100/SLC8A1/OAS2/P2RY12/CLIC2/PIK3CG/LYN/PROM2/TLR10/HAVCR2/LILRB2/AIF1/SFN/HLA-F/CD200R1/ALOX12B/FPR2/DOCK2/TLR4/NCKAP1L/HLA-E/CLEC9A/IL2RB/RAB25/PIK3R2/IL15/CLEC6A/TLR2/ABCA12/TLR1/GZMB/GLRX/CCR1/BANK1/ATP2C2/RAB8B/RA…
GO:0030141	secretory granule	169/2436	169	CC	806/18675	1.10661e-10	3.89867e-09	B2M/PTPRC/CYBB/MNDA/SRGN/CTSS/CD38/LRMP/ATP8B4/SLPI/BIN2/LILRB2/LYZ/FPR2/FLG2/KRTDAP/DOCK2/CD53/NCKAP1L/BSG/ARHGAP9/CTSW/EEF2/KRT1/TLR2/PKP1/ABCA12/GZMB/CLEC12A/RAB3A/VNN1/KLK5/IMPDH2/FGL2/DPP7/RAB37/PLAC8/TMEM184A/DSP/TBC1D10C/S100A7/NUDT1/C3AR1/GPI/DBH/CR1/TMSB4X/S100P/S100A8/ITGAL/SPINK5/APRT/CBARP/HK3/S100A9/LILRB3/SCNN1A/SLC2A5/AGPAT2/JUP/NCS1/LAIR1/GPR84/LAMP3/ARG1/HRNR/FCN1/CDA/CLEC4C/KLK7…
GO:0045621	positive regulation of lymphocyte differentiation	37/2341	37	BP	93/17910	1.02745e-10	3.92128e-09	IFNG/PTPRC/CD80/CYLD/CD86/RASGRP1/IL2RA/LILRB2/IL7/NCKAP1L/IL12RB1/IL7R/IL15/TESPA1/BTK/CD27/IL12B/VNN1/TOX/CD74/LILRB4/INPP5D/NLRP3/SOCS1/IL18/SASH3/TNFSF4/PIK3R6/IL23R/LGALS9/ZAP70/ADAM8/IHH/HLA-G/AXL/GATA3/CCL19
GO:1903557	positive regulation of tumor necrosis factor superfamily cytokine production	34/2341	34	BP	81/17910	1.03485e-10	3.93196e-09	IFIH1/IFNG/PTPRC/CYBB/DDX58/CD86/CCR2/RASGRP1/CD2/TLR3/JAK2/HAVCR2/TLR4/HLA-E/TLR2/TLR1/IL12B/LRRK2/SPN/SASH3/HSPB1/PTAFR/TYROBP/MIF/NOD2/CCL3/LILRA2/LGALS9/NFATC4/LILRA5/ADAM8/PF4/LEP/CCL19
GO:0031295	T cell costimulation	27/2341	27	BP	55/17910	1.11865e-10	4.23157e-09	PDCD1LG2/CD274/ICOS/CD80/CD86/LYN/CD28/TNFSF13B/BTLA/PDCD1/TNFSF14/VAV1/LCK/CD160/KLRK1/CARD11/CD3E/PTPN6/TNFSF4/GRAP2/CD40LG/CD24/CCR7/EFNB3/KLRC4-KLRK1/CTLA4/CCL19
GO:0042035	regulation of cytokine biosynthetic process	41/2341	41	BP	110/17910	1.15066e-10	4.33346e-09	IRF1/PTPRC/CD80/CYBB/NMI/LILRB1/TLR8/CD86/TLR7/CCR2/TLR3/CD28/LAG3/IL27/TLR4/EBI3/TLR1/IL12B/TNF/PRKCQ/INPP5D/CARD11/SPN/TLR6/HSPB1/PTAFR/CD3E/SFTPD/TYROBP/GHRL/CD4/EREG/FOXJ1/CX3CR1/IL10/RNF128/IL1B/LTB/GATA3/IGF2BP1/APOA2
GO:0045058	T cell selection	24/2341	24	BP	45/17910	1.3023e-10	4.88306e-09	THEMIS/PTPRC/CYLD/TBX21/CD28/DOCK2/SLAMF6/IL12RB1/IL15/CD3D/IL12B/CD1D/JAG2/CD74/CARD11/SPN/CD3E/LY9/CD4/BCL11B/IL23R/ZAP70/CCR7/GATA3
GO:0006887	exocytosis	178/2341	178	BP	862/17910	1.41919e-10	5.29812e-09	IFNG/B2M/PTPRC/CCL8/CYBB/MNDA/SRGN/GRIN3A/CTSS/CCL5/PLEK/CCR2/RASGRP1/LRMP/CD84/ATP8B4/SLPI/PIK3CG/LYN/BIN2/LILRB2/LYZ/HLA-F/FPR2/FLG2/DOCK2/CD53/NCKAP1L/ARHGAP9/BTK/CTSW/EEF2/KRT1/TLR2/PKP1/ABCA12/CLEC12A/CCR1/RAB3A/VNN1/IMPDH2/FGL2/DPP7/RAB37/PLAC8/DSP/TBC1D10C/S100A7/C3AR1/GPI/LAT2/CPLX1/CR1/TMSB4X/S100P/S100A8/ITGAL/LRRK2/APRT/CBARP/HK3/S100A9/LILRB3/SLC2A5/AGPAT2/JUP/NCS1/LAIR1/GPR84/HCK/ARG…
GO:0046634	regulation of alpha-beta T cell activation	36/2341	36	BP	90/17910	1.52954e-10	5.68523e-09	CD274/IRF1/IFNG/PTPRC/CD80/LILRB1/CD86/CCR2/TBX21/CD28/IL27/NCKAP1L/IL12RB1/HLA-E/EBI3/PRDM1/IL12B/ZNF683/CD160/XCL1/PRKCQ/NLRP3/RASAL3/SOCS1/IL18/SASH3/JAK3/CD3E/CD300A/TNFSF4/IL23R/LGALS9/ZAP70/IHH/GATA3/CCL19
GO:0042108	positive regulation of cytokine biosynthetic process	29/2341	29	BP	63/17910	1.66078e-10	6.14633e-09	IRF1/PTPRC/CD80/CYBB/TLR8/CD86/TLR7/CCR2/TLR3/CD28/IL27/TLR4/EBI3/TLR1/IL12B/TNF/PRKCQ/CARD11/SPN/TLR6/HSPB1/PTAFR/CD3E/TYROBP/CD4/EREG/IL1B/LTB/APOA2
GO:0097529	myeloid leukocyte migration	54/2341	54	BP	170/17910	1.76254e-10	6.49482e-09	CXCL10/PTGER4/CCL5/CCR2/P2RY12/PIK3CG/LYN/AIF1/CD200R1/FPR2/NCKAP1L/S100A14/RPS19/CCR1/STAP1/VAV1/S100A7/C3AR1/XCL1/CMKLR1/S100A8/SLAMF8/CD74/S100A9/JAML/CSF1/CCL2/CCL7/LGMN/CD300A/SFTPD/ITGB2/PTPRO/MIF/CCL3/VAV3/S100A12/RAC2/EDN3/CXCL12/TNFSF11/CX3CR1/ADAM8/CXCR2/EDN2/RIPOR2/KIT/CCR7/PLA2G7/PRTN3/CCL1/CYP19A1/SAA1/CCL19
GO:0042089	cytokine biosynthetic process	43/2341	43	BP	120/17910	1.78293e-10	6.54174e-09	IRF1/PTPRC/CD80/CYBB/NMI/LILRB1/TLR8/CD86/TLR7/CCR2/TLR3/CD28/LAG3/IL27/TLR4/EBI3/TLR1/IL12B/TNF/PRKCQ/INPP5D/CARD11/SPN/TLR6/IL18/HSPB1/PTAFR/CD3E/SFTPD/TYROBP/GHRL/CD4/EREG/FOXJ1/CX3CR1/IL10/RNF128/IL1B/LTB/GATA3/IGF2BP1/APOA2/CMA1
GO:0031294	lymphocyte costimulation	27/2341	27	BP	56/17910	1.89179e-10	6.91149e-09	PDCD1LG2/CD274/ICOS/CD80/CD86/LYN/CD28/TNFSF13B/BTLA/PDCD1/TNFSF14/VAV1/LCK/CD160/KLRK1/CARD11/CD3E/PTPN6/TNFSF4/GRAP2/CD40LG/CD24/CCR7/EFNB3/KLRC4-KLRK1/CTLA4/CCL19
GO:0002446	neutrophil mediated immunity	116/2341	116	BP	499/17910	2.15061e-10	7.82364e-09	B2M/PTPRC/CYBB/MNDA/CTSS/LRMP/ATP8B4/SLPI/BIN2/LILRB2/LYZ/FPR2/FLG2/DOCK2/CD53/NCKAP1L/ARHGAP9/EEF2/KRT1/TLR2/PKP1/CLEC12A/RAB3A/VNN1/IMPDH2/FGL2/DPP7/RAB37/PLAC8/DSP/TBC1D10C/S100A7/C3AR1/GPI/CR1/S100P/S100A8/ITGAL/APRT/HK3/S100A9/LILRB3/SLC2A5/AGPAT2/JUP/LAIR1/GPR84/ARG1/HRNR/FCN1/CDA/CLEC4C/SLC27A2/TICAM2/SIGLEC5/CALML5/GLIPR1/CLEC4D/HLA-H/ADA2/GMFG/SELL/CD33/PTAFR/RNASE2/TNFRSF1B/CD300A/PTPN6…
GO:0072676	lymphocyte migration	35/2341	35	BP	87/17910	2.27319e-10	8.23452e-09	CXCL10/CXCL11/CCL5/CCL4/CCR2/CXCL13/TBX21/PIK3CG/AIF1/CD200R1/DOCK8/TNFSF14/GPR183/S100A7/CXCR3/XCL1/KLRK1/SPN/CCL2/CCL7/GPR15/CCL3/MYO1G/ITGB7/GCSAM/CCR6/ZAP70/CXCL12/ADAM8/RIPOR2/CCR7/KLRC4-KLRK1/GATA3/SAA1/CXCL14
GO:0009966	regulation of signal transduction	538/2341	538	BP	3265/17910	2.80905e-10	1.01327e-08	GBP1/STAT1/CXCL10/CXCL11/PARP14/AKAP5/UBD/DDX60/TRIM22/SH2D1A/IRF1/PARP9/CXCL9/IFNG/PTPN22/TRAT1/PTPRC/APOL3/RSAD2/TNIP3/BIRC3/PYHIN1/CCL8/ICOS/CD80/FASLG/CYLD/NLRC5/RGS18/CLNK/CD3G/SAMHD1/CD86/CDC42SE2/TNFSF10/CCL5/PLEK/LAX1/TLR7/ACOD1/SLA/SOD2/CCL4/NLRC3/CCR2/CXCL13/RASGRP1/XCL2/IFIT5/FCRL3/SLAMF1/TLR3/JAK2/SP100/TAGAP/P2RY12/CD226/CLIC2/PIK3CG/PIK3AP1/PSMB9/LYN/RNF213/TNFSF8/CMAHP/HAVCR2/IL10R…
GO:0002285	lymphocyte activation involved in immune response	51/2341	51	BP	158/17910	2.96012e-10	1.06328e-08	IFNG/PTPRC/CD80/PTGER4/LILRB1/CD86/TBX21/HAVCR2/CD28/HLA-F/SLAMF6/IL27/TLR4/HLA-DMB/IL12RB1/DOCK11/IL12B/PLCL2/CD244/ZNF683/LCP1/CLEC4E/APBB1IP/GPR183/FGL2/ITGAL/NLRP3/SPN/IL18/CLEC4D/IFNL1/JAK3/TNFSF18/CORO1A/IL18R1/TNFSF4/LY9/AICDA/PLCG2/EOMES/IL23R/CCR6/LGALS9/FCGR2B/CD40LG/CD19/ITM2A/IL10/GATA3/RORC/CCL19
GO:0007267	cell-cell signaling	279/2341	279	BP	1510/17910	3.00368e-10	1.07441e-08	CXCL10/CXCL11/AKAP5/SH2D1A/CXCL9/IFNG/CCL8/FASLG/CYLD/CCR5/GRIN3A/CD38/TNFSF10/CCL5/CCL4/CCR2/CXCL13/JAK2/PSMB9/LYN/RNF213/TNFSF8/CMAHP/EFNA3/NSMF/LILRB2/IL7/PSMB8/UBA52/IL15/CPEB3/PHEX/BTK/PSME2/TLR2/CCR1/TSHR/PLCL2/RAB8B/RAB3A/GAL/SIRPG/APCDD1/FCRL2/XCL1/JPH3/EFNA4/TNF/CGAS/DBH/STAC3/CPLX1/S100A8/LRRK2/SIGLEC6/SLC1A6/S100A9/LRP5/JUP/RAC3/ECE2/PSMB10/NCS1/KMO/PPARD/DBN1/NKD1/SEPTIN5/CCL2/LTA/SCN…
GO:0002286	T cell activation involved in immune response	35/2341	35	BP	88/17910	3.30298e-10	1.17655e-08	IFNG/CD80/PTGER4/LILRB1/CD86/TBX21/HAVCR2/SLAMF6/IL27/HLA-DMB/IL12RB1/IL12B/LCP1/CLEC4E/APBB1IP/GPR183/FGL2/ITGAL/NLRP3/SPN/IL18/CLEC4D/IFNL1/JAK3/TNFSF18/IL18R1/TNFSF4/LY9/EOMES/IL23R/LGALS9/FCGR2B/GATA3/RORC/CCL19
GO:0008236	serine-type peptidase activity	51/2173	51	MF	158/16967	1.39988e-10	1.27127e-08	GZMK/GZMA/GZMH/CFB/KLK10/GZMB/KLK5/DPP7/C1S/F12/C2/KLK13/KLK8/TPSG1/KLK7/PRSS27/PRSS8/TMPRSS3/RHBDL1/TMPRSS4/KLK6/KLK11/F10/C1R/KLK4/HTRA4/KLK14/ENDOU/TMPRSS13/F7/TMPRSS11D/ADAM8/PCSK9/PRSS3/TMPRSS9/PRSS22/RHBDL3/MASP1/DPP6/PRTN3/PRSS56/MMP2/HGFAC/MMP9/DPP10/TPSB2/PCSK1/PCSK2/CTSG/CMA1/F2
GO:0099503	secretory vesicle	186/2436	186	CC	923/18675	3.84948e-10	1.30597e-08	B2M/PTPRC/CYBB/MNDA/SRGN/CTSS/CD38/LRMP/ATP8B4/SLPI/BIN2/LILRB2/LYZ/FPR2/FLG2/KRTDAP/DOCK2/CD53/NCKAP1L/BSG/ARHGAP9/CTSW/EEF2/KRT1/TLR2/PKP1/ABCA12/GZMB/CLEC12A/RAB3A/VNN1/KLK5/IMPDH2/FGL2/SLC40A1/DPP7/RAB37/PLAC8/TMEM184A/DSP/TBC1D10C/S100A7/NUDT1/C3AR1/GPI/SEMA4C/DBH/CR1/TMSB4X/S100P/S100A8/ITGAL/LRRK2/SPINK5/APRT/CBARP/HK3/S100A9/LILRB3/SCNN1A/SLC2A5/AGPAT2/JUP/NCS1/LAIR1/GPR84/LAMP3/ARG1/HRNR…
GO:0019955	cytokine binding	38/2173	38	MF	100/16967	1.54486e-10	1.3204e-08	GBP1/CCR5/CCR2/CXCR6/IL10RA/IL12RB1/IL2RB/CCR1/IL12B/CCR3/IL18BP/CXCR3/CSF1R/CD74/NLRP7/IL2RG/CRLF1/TNFRSF1B/IL18R1/LTBP4/IL20RB/CD4/IL23R/CCR6/CXCR4/CX3CR1/CXCR2/IL36RN/KIT/CCR7/CXCR1/IL31RA/WFIKKN2/IL22RA2/CNTFR/COMP/HJV/SOSTDC1
GO:1903532	positive regulation of secretion by cell	94/2341	94	BP	381/17910	4.36803e-10	1.54947e-08	CD274/IFIH1/IFNG/PTPN22/CRTAM/PTGER4/DDX58/TLR8/CD38/RASGRP1/CD2/JAK2/HAVCR2/AIF1/HLA-F/TLR4/HLA-E/CLEC9A/CLEC6A/TLR2/TLR1/RAB8B/RAB3A/GAL/CD244/CLEC4E/CD160/AIM2/GPI/TNF/LRRK2/CSF1R/NLRP3/NCS1/KMO/PPARD/FCN1/PAEP/IL33/CD33/PTAFR/FERMT1/C1QTNF12/VSNL1/TNFSF4/ITGB2/MIF/NOD2/CCL3/IL26/ITGAM/ADCY8/GHRL/BAIAP3/LILRA2/GPER1/TFR2/SDC1/EDN3/RASL10B/LGALS9/CXCL12/TNFSF11/SOX11/LILRA5/ADAM8/CLEC5A/FOXL2/I…
GO:0050715	positive regulation of cytokine secretion	45/2341	45	BP	132/17910	4.46372e-10	1.57687e-08	CD274/IFIH1/PTPN22/CRTAM/PTGER4/DDX58/TLR8/RASGRP1/CD2/HAVCR2/AIF1/TLR4/CLEC9A/CLEC6A/TLR2/TLR1/CD244/CLEC4E/CD160/AIM2/TNF/LRRK2/CSF1R/NLRP3/FCN1/PAEP/IL33/FERMT1/MIF/NOD2/CCL3/IL26/LILRA2/LGALS9/LILRA5/CLEC5A/IL10/IL1B/TSLP/CCL1/GATA3/VTCN1/SAA1/CCL19/IGHD
GO:1903555	regulation of tumor necrosis factor superfamily cytokine production	50/2341	50	BP	155/17910	4.5212e-10	1.59061e-08	CD274/IFIH1/IFNG/PTPN22/PTPRC/CYBB/LILRB1/DDX58/CD86/NLRC3/CCR2/RASGRP1/SLAMF1/CD2/TLR3/JAK2/HAVCR2/TLR4/GPR18/HLA-E/TLR2/CLEC4A/TLR1/IL12B/MC1R/LRRK2/SPN/SASH3/HSPB1/CD33/PTAFR/PTPN6/TYROBP/GSTP1/MIF/NOD2/CCL3/GHRL/LILRA2/LGALS9/NFATC4/CX3CR1/LILRA5/ADAM8/IL10/AXL/CIDEA/PF4/LEP/CCL19
GO:0002690	positive regulation of leukocyte chemotaxis	33/2341	33	BP	81/17910	4.99229e-10	1.74914e-08	CXCL10/CCL5/CCL4/CCR2/CXCL13/AIF1/FPR2/NCKAP1L/S100A14/CCR1/TNFSF14/S100A7/C3AR1/XCL1/CMKLR1/CD74/CSF1/CCL7/LGMN/CCL3/RAC2/EDN3/LGALS9/F7/CXCL12/CXCR2/EDN2/RIPOR2/CCR7/PLA2G7/CCL1/CXCL14/CCL19
GO:0004252	serine-type endopeptidase activity	45/2173	45	MF	133/16967	2.99381e-10	2.41667e-08	GZMK/GZMA/GZMH/CFB/KLK10/GZMB/KLK5/C1S/F12/C2/KLK13/KLK8/KLK7/PRSS27/PRSS8/TMPRSS3/RHBDL1/TMPRSS4/KLK6/KLK11/F10/C1R/KLK4/HTRA4/KLK14/TMPRSS13/F7/TMPRSS11D/ADAM8/PCSK9/PRSS3/TMPRSS9/PRSS22/RHBDL3/MASP1/PRTN3/PRSS56/MMP2/MMP9/TPSB2/PCSK1/PCSK2/CTSG/CMA1/F2
GO:0032615	interleukin-12 production	26/2341	26	BP	55/17910	7.08164e-10	2.47106e-08	IDO1/IRF1/IFNG/TIGIT/LILRB1/TLR8/SLAMF1/TLR3/IRF8/TLR4/TLR2/IL12B/CMKLR1/JAK3/TNFSF4/MEFV/IL23R/LGALS9/CD40LG/LILRA5/IL10/CCR7/HLA-G/LTB/LEP/CCL19
GO:0002704	negative regulation of leukocyte mediated immunity	24/2341	24	BP	48/17910	7.48586e-10	2.60149e-08	PTPRC/LILRB1/CCR2/CD84/TBX21/CD96/HAVCR2/HLA-F/HLA-E/IL7R/KIR2DL4/XCL1/CR1/ARG1/JAK3/CD300A/PTPN6/IL20RB/FOXJ1/BST2/LGALS9/FCGR2B/SERPINB9/HLA-G
GO:0002698	negative regulation of immune effector process	41/2341	41	BP	116/17910	7.59984e-10	2.63041e-08	PTPRC/LILRB1/CCR2/FCRL3/CD84/IL2RA/TBX21/CD96/HAVCR2/HLA-F/HLA-E/IL7R/RPS19/KIR2DL4/FGL2/XCL1/TNF/CR1/SPINK5/SLAMF8/ARG1/IL33/DHX58/IFNL1/JAK3/VSIG4/NLRX1/SERPING1/CD300A/PTPN6/TNFSF4/IL20RB/FOXJ1/BST2/LGALS9/FCGR2B/APOA1/IL10/SERPINB9/HLA-G/APOA2
GO:0050920	regulation of chemotaxis	56/2341	56	BP	186/17910	7.92422e-10	2.73162e-08	CXCL10/CCL5/CCL4/CCR2/CXCL13/P2RY12/LYN/AIF1/FPR2/NCKAP1L/GPR18/S100A14/CCR4/CCR1/TNFSF14/STAP1/GPR183/S100A7/C3AR1/XCL1/CMKLR1/TMSB4X/KLRK1/SLAMF8/CD74/CSF1/CCL2/CCL7/HSPB1/SUCNR1/LGMN/FGF1/WNT3A/PTPRO/GSTP1/MIF/CCL3/RAC2/EDN3/LGALS9/F7/CXCL12/CXCR4/WNT3/CXCR2/EDN2/RIPOR2/CDH13/CCR7/PLA2G7/KLRC4-KLRK1/CCL1/CYP19A1/ROBO2/CXCL14/CCL19
GO:0051607	defense response to virus	65/2341	65	BP	231/17910	8.25562e-10	2.83443e-08	GBP1/STAT1/CXCL10/IFI44L/DDX60/IFIH1/TRIM22/DTX3L/IRF1/PARP9/CXCL9/IFNG/PTPRC/RSAD2/GBP3/BIRC3/NLRC5/LILRB1/DDX58/TLR8/SAMHD1/TLR7/IFIT5/IL2RA/TLR3/APOBEC3G/OAS2/IFIT1/PRF1/OAS1/IL27/IL12RB1/IL15/IRF9/TRIM34/OASL/IL12B/APOBEC3D/FGL2/SLFN11/AIM2/OAS3/RTP4/CGAS/EXOSC4/MX1/NLRP3/IL33/DHX58/IFNL1/RNASE2/NLRX1/APOBEC3A/APOBEC3F/HERC5/APOBEC3H/IFI6/ISG15/RNASE6/IL23R/TSPAN32/BST2/CD207/IL1B/IFI27
GO:0071216	cellular response to biotic stimulus	60/2341	60	BP	206/17910	8.47029e-10	2.8965e-08	CXCL10/PTPN22/TNIP3/CCR5/LILRB1/CCL5/ACOD1/LYN/IRF8/NUGGC/HAVCR2/LILRB2/CMPK2/TLR4/BTK/TLR2/TLR1/IL12B/STAP1/MRC1/TNF/KLRK1/NLRP3/KMO/PPARD/HCK/ARG1/NLRP7/CD6/TICAM2/TLR6/CCL2/IL18/CD180/LY86/PTAFR/TNFRSF1B/TNFSF4/IRAK2/AICDA/GSTP1/MIF/NOD2/CCL3/CARD17/GFI1/LILRA2/FCGR2B/NOS3/CX3CR1/LCN2/IL10/ASS1/NOS2/AXL/HAMP/IL1B/KLRC4-KLRK1/ANKRD1/CTSG
GO:1902533	positive regulation of intracellular signal transduction	200/2341	200	BP	1019/17910	9.35512e-10	3.18633e-08	PARP14/UBD/DDX60/TRIM22/PARP9/IFNG/PTPN22/TRAT1/PTPRC/APOL3/BIRC3/PYHIN1/ICOS/CD80/FASLG/CD86/TNFSF10/CCL5/TLR7/CCL4/RASGRP1/IFIT5/FCRL3/SLAMF1/TLR3/JAK2/P2RY12/PIK3CG/PIK3AP1/LYN/HAVCR2/IL10RA/CD28/ALOX12B/FPR2/TLR4/IL7R/UBA52/PIK3R2/MLKL/SCIMP/IL15/CLEC6A/TLR2/CD27/TIFA/SEMA4D/MLST8/FGD2/CCR1/TNFSF14/BANK1/IL12B/RPS3/HCLS1/GPR183/VAV1/LCK/FLT3/FFAR4/S100A7/CASP10/MC1R/SEMA4C/TNF/CGAS/S100A8/LRR…
GO:0051047	positive regulation of secretion	98/2341	98	BP	409/17910	1.01073e-09	3.42886e-08	CD274/IFIH1/IFNG/PTPN22/CRTAM/PTGER4/DDX58/TLR8/CD38/RASGRP1/CD2/JAK2/HAVCR2/AIF1/HLA-F/ALOX12B/TLR4/HLA-E/CLEC9A/CLEC6A/TLR2/TLR1/RAB8B/RAB3A/GAL/CD244/CLEC4E/CD160/AIM2/GPI/TNF/S100A8/LRRK2/CSF1R/NLRP3/NCS1/KMO/PPARD/FCN1/PAEP/IL33/CD33/PTAFR/FERMT1/C1QTNF12/VSNL1/TNFSF4/ITGB2/MIF/NOD2/CCL3/IL26/ITGAM/ADCY8/GHRL/BAIAP3/LILRA2/GPER1/TFR2/SDC1/EDN3/RASL10B/LGALS9/CXCL12/TNFSF11/SOX11/LILRA5/ADAM8…
GO:0050868	negative regulation of T cell activation	38/2341	38	BP	104/17910	1.06139e-09	3.58649e-08	PDCD1LG2/IDO1/CD274/IRF1/PTPN22/TIGIT/LILRB1/LAX1/IL2RA/TBX21/HAVCR2/LILRB2/LAG3/XCL1/MAD1L1/CD74/ARG1/SPN/SOCS1/IFNL1/NRARP/JAK3/VSIG4/CD300A/PTPN6/SFTPD/TNFSF4/IL20RB/FOXJ1/LGALS9/FCGR2B/RIPOR2/IL10/IHH/HLA-G/CTLA4/VTCN1/FGL1
GO:0002791	regulation of peptide secretion	111/2341	111	BP	483/17910	1.07261e-09	3.61014e-08	GBP1/CD274/IFIH1/IFNG/PTPN22/CRTAM/RSAD2/SRGN/PTGER4/LILRB1/DDX58/TLR8/CD38/CCL5/RASGRP1/CD2/JAK2/LYN/TLR10/HAVCR2/AIF1/CD200R1/TLR4/HLA-E/CLEC9A/CLEC6A/TLR2/TLR1/BANK1/RAB8B/CD244/CLEC4E/FFAR4/CD160/AIM2/GPI/TNF/TMSB4X/S100A8/LRRK2/CSF1R/CD74/NLRP3/PPARD/FCN1/PAEP/NLRP7/SOCS1/IL33/TLR6/CD33/TNFRSF1B/FERMT1/C1QTNF12/VSNL1/TNFSF4/ITPR1/MIF/NOD2/CCL3/CARD17/IL26/ADCY8/GHRL/BAIAP3/LILRA2/GPER1/SLC2A…
GO:0017171	serine hydrolase activity	51/2173	51	MF	163/16967	4.88376e-10	3.73479e-08	GZMK/GZMA/GZMH/CFB/KLK10/GZMB/KLK5/DPP7/C1S/F12/C2/KLK13/KLK8/TPSG1/KLK7/PRSS27/PRSS8/TMPRSS3/RHBDL1/TMPRSS4/KLK6/KLK11/F10/C1R/KLK4/HTRA4/KLK14/ENDOU/TMPRSS13/F7/TMPRSS11D/ADAM8/PCSK9/PRSS3/TMPRSS9/PRSS22/RHBDL3/MASP1/DPP6/PRTN3/PRSS56/MMP2/HGFAC/MMP9/DPP10/TPSB2/PCSK1/PCSK2/CTSG/CMA1/F2
GO:0048871	multicellular organismal homeostasis	109/2341	109	BP	472/17910	1.13338e-09	3.79972e-08	B2M/CD38/CCR2/JAK2/SFN/LYZ/ALOX12B/FLG2/TLR4/IL7/IL15/JCHAIN/KRT1/ABCA12/FLG/TSHR/PLCL2/KRT16/SLC40A1/PLAC8/FFAR4/USH1G/CMKLR1/IGKC/TNF/DBH/PEMT/CSF1R/INPP5D/ALOXE3/SCNN1A/RAC3/SCX/TULP1/HRNR/ABCA4/CSF1/ID1/CLDN4/IL18/KDF1/SASH3/HSPB1/IRX3/CORO1A/SFTPD/IL18R1/AMPD3/ACER1/GRHL3/NOD2/PRKAR1B/PTH1R/CDH3/CIB2/IL20RB/FABP5/MFAP2/ADCY8/GHRL/IGHG3/GRHL1/ALB/RAC2/SCNN1G/NOS3/CXCR4/TNFSF11/ATP6V1B1/PPP1R1…
GO:0002793	positive regulation of peptide secretion	73/2341	73	BP	275/17910	1.34161e-09	4.48026e-08	CD274/IFIH1/PTPN22/CRTAM/PTGER4/DDX58/TLR8/CD38/RASGRP1/CD2/JAK2/HAVCR2/AIF1/TLR4/HLA-E/CLEC9A/CLEC6A/TLR2/TLR1/RAB8B/CD244/CLEC4E/CD160/AIM2/GPI/TNF/S100A8/LRRK2/CSF1R/NLRP3/PPARD/FCN1/PAEP/IL33/CD33/FERMT1/C1QTNF12/VSNL1/TNFSF4/MIF/NOD2/CCL3/IL26/ADCY8/GHRL/BAIAP3/LILRA2/GPER1/TFR2/RASL10B/LGALS9/TNFSF11/LILRA5/ADAM8/CLEC5A/IL10/CFTR/NMU/IL1B/TSLP/HCAR2/CCL1/GATA3/VTCN1/MYRIP/BLK/RBP4/ANKRD1/GC…
GO:0032655	regulation of interleukin-12 production	25/2341	25	BP	53/17910	1.59342e-09	5.30045e-08	IDO1/IRF1/IFNG/TIGIT/LILRB1/TLR8/SLAMF1/TLR3/IRF8/TLR4/TLR2/IL12B/CMKLR1/JAK3/TNFSF4/MEFV/IL23R/LGALS9/CD40LG/LILRA5/IL10/CCR7/HLA-G/LTB/CCL19
GO:0050864	regulation of B cell activation	39/2341	39	BP	110/17910	1.76687e-09	5.85464e-08	SAMSN1/PTPRC/CYLD/MNDA/CD38/FCRL3/IKZF3/TBX21/CD28/SLA2/TLR4/IL7/TNFSF13B/NCKAP1L/BTK/CD27/BANK1/GPR183/MZB1/SLAMF8/CD74/INPP5D/CARD11/CD300A/PTPN6/TYROBP/TNFSF4/WNT3A/MIF/NOD2/VAV3/FOXJ1/FCGR2B/NFAM1/CD19/IL10/CTLA4/CHRNB2/IL13
GO:0065009	regulation of molecular function	504/2341	504	BP	3065/17910	1.7746e-09	5.85754e-08	CXCL10/CXCL11/AKAP5/TRIM22/DTX3L/PARP9/CXCL9/GCH1/IFNG/PTPN22/B2M/IFIT2/GPR65/PTPRC/BIRC3/PYHIN1/CCL8/FASLG/CYLD/NLRC5/RGS18/DDX58/CTSS/TNFSF10/CCL5/PLEK/LAX1/ACOD1/CCL4/NLRC3/CCR2/CXCL13/ITK/RASGRP1/XCL2/FCRL3/TNFAIP8/IL18RAP/GZMA/TLR3/JAK2/SP100/TAGAP/P2RY12/P2RY13/CLIC2/SLPI/PIK3CG/PSMB9/LYN/IFIT1/NAIP/TNFSF8/PROM2/EFNA3/HAVCR2/WARS1/NLRC4/NEUROG3/TRIM21/SFN/FCGR1A/FPR2/PI3/RHOH/PPP1R2P1/SLA2/…
GO:0045954	positive regulation of natural killer cell mediated cytotoxicity	16/2341	16	BP	24/17910	1.80146e-09	5.92335e-08	SH2D1A/CRTAM/RASGRP1/IL18RAP/CD226/HLA-F/LAG3/SLAMF6/HLA-E/IL12B/VAV1/CD160/KLRK1/NCR3/RAET1E/KLRC4-KLRK1
GO:0071706	tumor necrosis factor superfamily cytokine production	50/2341	50	BP	161/17910	1.96669e-09	6.44185e-08	CD274/IFIH1/IFNG/PTPN22/PTPRC/CYBB/LILRB1/DDX58/CD86/NLRC3/CCR2/RASGRP1/SLAMF1/CD2/TLR3/JAK2/HAVCR2/TLR4/GPR18/HLA-E/TLR2/CLEC4A/TLR1/IL12B/MC1R/LRRK2/SPN/SASH3/HSPB1/CD33/PTAFR/PTPN6/TYROBP/GSTP1/MIF/NOD2/CCL3/GHRL/LILRA2/LGALS9/NFATC4/CX3CR1/LILRA5/ADAM8/IL10/AXL/CIDEA/PF4/LEP/CCL19
GO:0050729	positive regulation of inflammatory response	48/2341	48	BP	153/17910	2.83364e-09	9.2461e-08	IDO1/GBP5/PTGER4/TLR7/CCR2/TLR3/JAK2/PIK3CG/TLR10/CD28/TLR4/HLA-E/IL15/BTK/RPS19/TLR2/IL12B/STAP1/F12/TNF/S100A8/LRRK2/S100A9/CD6/IL33/TLR6/LTA/IL18/SUCNR1/C1QA/TNFSF4/ITGB2/NOD2/CCL3/ITGAM/S100A12/TNFSF11/LILRA5/ADAM8/TTBK1/CCR7/C3/PLA2G7/CNR1/IL1B/TSLP/CCL1/AGT
GO:0002687	positive regulation of leukocyte migration	41/2341	41	BP	121/17910	3.22096e-09	1.04303e-07	CXCL10/CCL8/CCL5/CCL4/CCR2/CXCL13/P2RY12/AIF1/FPR2/DOCK8/NCKAP1L/S100A14/CCR1/TNFSF14/S100A7/C3AR1/XCL1/CMKLR1/TNF/CD74/CSF1/SPN/CCL7/LGMN/PTAFR/TNFSF18/CCL3/RAC2/EDN3/LGALS9/F7/CXCL12/ADAM8/CXCR2/EDN2/RIPOR2/CCR7/PLA2G7/CCL1/CXCL14/CCL19
GO:1903038	negative regulation of leukocyte cell-cell adhesion	41/2341	41	BP	121/17910	3.22096e-09	1.04303e-07	PDCD1LG2/IDO1/CD274/IRF1/PTPN22/TIGIT/LILRB1/LAX1/IL2RA/TBX21/HAVCR2/LILRB2/LAG3/XCL1/MAD1L1/CCL25/CD74/ARG1/SPN/SOCS1/IFNL1/NRARP/JAK3/VSIG4/CD300A/PTPN6/SFTPD/TNFSF4/IL20RB/FOXJ1/LGALS9/FCGR2B/CXCL12/RIPOR2/IL10/IHH/ASS1/HLA-G/CTLA4/VTCN1/FGL1
GO:0046632	alpha-beta T cell differentiation	36/2341	36	BP	99/17910	3.36672e-09	1.08612e-07	IRF1/IFNG/RSAD2/CD80/PTGER4/CD86/TBX21/SLAMF6/IL27/NCKAP1L/GPR18/IL12RB1/PLA2G2D/PRDM1/IL12B/ZNF683/GPR183/NLRP3/SPN/SOCS1/IL18/SASH3/JAK3/IL18R1/TNFSF4/LY9/EOMES/BCL11B/IL23R/LGALS9/ZAP70/IHH/GATA3/RORC/CCL19/PAX1
GO:0032760	positive regulation of tumor necrosis factor production	31/2341	31	BP	78/17910	3.42065e-09	1.09937e-07	IFIH1/PTPRC/CYBB/DDX58/CCR2/RASGRP1/CD2/TLR3/JAK2/HAVCR2/TLR4/HLA-E/TLR2/TLR1/IL12B/LRRK2/SPN/SASH3/HSPB1/PTAFR/TYROBP/MIF/NOD2/CCL3/LILRA2/LGALS9/NFATC4/LILRA5/PF4/LEP/CCL19
GO:0032613	interleukin-10 production	24/2341	24	BP	51/17910	3.58614e-09	1.14824e-07	PDCD1LG2/IDO1/CD274/TIGIT/LILRB1/CD28/TLR4/TLR2/IL12B/XCL1/SASH3/JAK3/TYROBP/TNFSF4/NOD2/ISG15/IL20RB/IL23R/LGALS9/FCGR2B/CD40LG/LILRA5/TSLP/INAVA
GO:0007259	JAK-STAT cascade	45/2341	45	BP	140/17910	3.75748e-09	1.19861e-07	STAT1/PARP14/PARP9/IFNG/PTPRC/NMI/CCL5/CCR2/JAK2/STAT4/LYN/IL10RA/IL15/IL12B/HCLS1/FLT3/TNF/CSF1R/SOCS1/CRLF1/CCL2/IL18/IFNL1/JAK3/TNFSF18/CD300A/EPO/FGFR3/CYP1B1/IL26/PTK6/IL23R/KIT/IL10/TSLP/IL31RA/IL22RA2/LIF/LEP/IL13/AGT/PRLR/DAB1/IL20/F2
GO:0060337	type I interferon signaling pathway	34/2341	34	BP	91/17910	4.06192e-09	1.28613e-07	STAT1/XAF1/IRF1/IFIT3/IFIT2/RSAD2/GBP2/NLRC5/SAMHD1/HLA-B/SP100/OAS2/IFIT1/IRF8/OAS1/HLA-F/HLA-C/HLA-E/PSMB8/IRF9/OASL/IFITM1/OAS3/MX1/USP18/HLA-H/IFI35/PTPN6/IFI6/ISG15/BST2/IRF6/HLA-G/IFI27
GO:0071357	cellular response to type I interferon	34/2341	34	BP	91/17910	4.06192e-09	1.28613e-07	STAT1/XAF1/IRF1/IFIT3/IFIT2/RSAD2/GBP2/NLRC5/SAMHD1/HLA-B/SP100/OAS2/IFIT1/IRF8/OAS1/HLA-F/HLA-C/HLA-E/PSMB8/IRF9/OASL/IFITM1/OAS3/MX1/USP18/HLA-H/IFI35/PTPN6/IFI6/ISG15/BST2/IRF6/HLA-G/IFI27
GO:0042742	defense response to bacterium	66/2341	66	BP	245/17910	4.31946e-09	1.36262e-07	CXCL13/TLR3/SLPI/TNFSF8/IRF8/HAVCR2/NLRC4/LYZ/FPR2/TLR4/HLA-E/S100A14/MPEG1/JCHAIN/RPS19/TLR2/SIGLEC11/IL12B/KLK5/CLEC4E/PLAC8/CD160/S100A7/KRT6A/TNF/S100A8/SPINK5/KLRK1/SLAMF8/S100A9/NLRP3/SIGLEC16/IGKV3-20/RNASE7/KLK7/SPN/TLR6/DEFB1/LTA/CLEC4D/SFTPD/PGLYRP4/AICDA/NOD2/ISG15/RNASE6/CD4/S100A12/IL23R/IGHM/LCN2/PPBP/IL10/RNASE3/VGF/NOS2/ADGRB1/KLRC4-KLRK1/DEFB131B/GNLY/COCH/IGHA2/CTSG/IGHA1/F2/MBL2
GO:0050901	leukocyte tethering or rolling	16/2341	16	BP	25/17910	4.39436e-09	1.38115e-07	CCR2/VCAM1/GCNT1/TNF/CCL25/SPN/SELL/PTAFR/ITGB7/SELPLG/CXCL12/PODXL2/CX3CR1/SELE/ADD2/LEP
GO:0030667	secretory granule membrane	75/2436	75	CC	293/18675	4.25566e-09	1.38495e-07	PTPRC/CYBB/CD38/LRMP/ATP8B4/LILRB2/FPR2/CD53/NCKAP1L/BSG/TLR2/PKP1/CLEC12A/RAB3A/VNN1/RAB37/TMEM184A/DSP/TBC1D10C/C3AR1/DBH/CR1/ITGAL/LILRB3/SLC2A5/AGPAT2/LAIR1/GPR84/LAMP3/CLEC4C/SLC27A2/TICAM2/SIGLEC5/CA4/GLIPR1/CLEC4D/HLA-H/SELL/CD33/PTAFR/TNFRSF1B/CD300A/DSG1/TYROBP/FCAR/ITGB2/ITPR1/MGST1/DSC1/FPR1/SIGLEC14/ITGAM/FABP5/SIGLEC9/OLR1/BST2/P2RX1/FCGR3B/NFAM1/ENPP4/PLA1A/CEACAM6/ADAM8/IQGAP2/CXCR…
GO:0042101	T cell receptor complex	13/2436	13	CC	17/18675	4.38465e-09	1.38495e-07	TRAT1/CD3G/CD8A/CD8B/CD3D/CD247/APBB1IP/CD6/CD3E/PTPN6/CD4/ZAP70/SKAP1
GO:0045582	positive regulation of T cell differentiation	32/2341	32	BP	83/17910	4.68581e-09	1.46736e-07	IFNG/PTPRC/CD80/CYLD/CD86/RASGRP1/IL2RA/LILRB2/IL7/NCKAP1L/IL12RB1/IL7R/TESPA1/CD27/IL12B/VNN1/CD74/LILRB4/NLRP3/SOCS1/IL18/SASH3/TNFSF4/PIK3R6/IL23R/LGALS9/ZAP70/ADAM8/IHH/HLA-G/GATA3/CCL19
GO:0050714	positive regulation of protein secretion	68/2341	68	BP	256/17910	4.74646e-09	1.48093e-07	CD274/IFIH1/PTPN22/CRTAM/PTGER4/DDX58/TLR8/CD38/RASGRP1/CD2/JAK2/HAVCR2/AIF1/TLR4/HLA-E/CLEC9A/CLEC6A/TLR2/TLR1/CD244/CLEC4E/CD160/AIM2/GPI/TNF/LRRK2/CSF1R/NLRP3/PPARD/FCN1/PAEP/IL33/CD33/FERMT1/C1QTNF12/VSNL1/TNFSF4/MIF/NOD2/CCL3/IL26/ADCY8/GHRL/BAIAP3/LILRA2/GPER1/LGALS9/LILRA5/ADAM8/CLEC5A/IL10/CFTR/NMU/IL1B/TSLP/HCAR2/CCL1/GATA3/VTCN1/MYRIP/BLK/RBP4/ANKRD1/GCK/IL13/SAA1/CCL19/IGHD
GO:0032653	regulation of interleukin-10 production	23/2341	23	BP	48/17910	4.88714e-09	1.51928e-07	PDCD1LG2/IDO1/CD274/TIGIT/LILRB1/CD28/TLR4/TLR2/IL12B/XCL1/SASH3/JAK3/TYROBP/TNFSF4/NOD2/IL20RB/IL23R/LGALS9/FCGR2B/CD40LG/LILRA5/TSLP/INAVA
GO:0030101	natural killer cell activation	27/2341	27	BP	63/17910	4.95774e-09	1.53564e-07	PTPN22/PTPRC/RASGRP1/CD2/HAVCR2/HLA-F/HLA-E/IL15/IL21R/PRDM1/IL12B/CD244/ZNF683/TOX/KLRK1/SLAMF7/IL18/CORO1A/IL18R1/TYROBP/ITGB2/NCR3/IL23R/AXL/NCR1/KLRC4-KLRK1/LEP
GO:0050708	regulation of protein secretion	104/2341	104	BP	456/17910	5.56908e-09	1.71878e-07	GBP1/CD274/IFIH1/IFNG/PTPN22/CRTAM/RSAD2/SRGN/PTGER4/LILRB1/DDX58/TLR8/CD38/CCL5/RASGRP1/CD2/JAK2/LYN/TLR10/HAVCR2/AIF1/CD200R1/TLR4/HLA-E/CLEC9A/CLEC6A/TLR2/TLR1/BANK1/CD244/CLEC4E/FFAR4/CD160/AIM2/GPI/TNF/TMSB4X/LRRK2/CSF1R/NLRP3/PPARD/FCN1/PAEP/NLRP7/SOCS1/IL33/TLR6/CD33/TNFRSF1B/FERMT1/C1QTNF12/VSNL1/TNFSF4/ITPR1/MIF/NOD2/CCL3/CARD17/IL26/ADCY8/GHRL/BAIAP3/LILRA2/GPER1/SLC2A1/LGALS9/FCGR2B/CD…
GO:0008219	cell death	372/2341	372	BP	2178/17910	5.93238e-09	1.82431e-07	STAT1/CXCL10/XAF1/IDO1/CD274/UBD/IRF1/IFNG/IFIT3/IFIT2/GPR65/PTPRC/BIRC3/TRIM69/TNFRSF9/CASP5/FASLG/CYLD/MNDA/CCR5/SRGN/DRAM1/LILRB1/CD3G/BCL2L14/CD38/TNFSF10/CCL5/KRT17/SOD2/CD2/IL2RA/TNFAIP8/GZMA/IKZF3/TLR3/JAK2/SP100/GIMAP8/KRT10/EAF2/PIK3CG/LYN/PRF1/GZMH/NAIP/EVI2B/NUGGC/NLRC4/NSMF/CD28/AIF1/SFN/HLA-F/CD200R1/PI3/KRT6B/DOCK8/TLR4/IL7/NCKAP1L/IL7R/IL2RB/S100A14/UBA52/TGM1/MLKL/PDCD1/BTK/KRT1/C…
GO:0002456	T cell mediated immunity	33/2341	33	BP	88/17910	6.14934e-09	1.88425e-07	B2M/PTPRC/RSAD2/BTN3A3/LILRB1/CCR2/IL18RAP/TBX21/PRF1/BTN3A2/HLA-F/IL12RB1/HLA-E/IL7R/IL12B/TSTA3/XCL1/NLRP3/ARG1/IL18/SASH3/TNFRSF1B/IL18R1/DENND1B/TNFSF4/MYO1G/WAS/IL20RB/IL23R/FCGR2B/HLA-G/IL1B/GATA3
GO:0046425	regulation of JAK-STAT cascade	40/2341	40	BP	120/17910	8.51775e-09	2.60065e-07	PARP14/PARP9/IFNG/PTPRC/CCL5/JAK2/LYN/IL10RA/IL15/IL12B/HCLS1/FLT3/TNF/CSF1R/SOCS1/CRLF1/IL18/IFNL1/JAK3/TNFSF18/CD300A/EPO/FGFR3/CYP1B1/IL26/PTK6/IL23R/KIT/IL10/TSLP/IL31RA/IL22RA2/LIF/LEP/IL13/AGT/PRLR/DAB1/IL20/F2
GO:0033993	response to lipid	174/2341	174	BP	883/17910	9.16909e-09	2.78956e-07	CXCL10/IDO1/GCH1/PTPN22/TNIP3/CYBB/FASLG/CCR5/PTGER4/LILRB1/CD38/CCL5/ACOD1/JAK2/SLPI/CD96/LYN/IRF8/NUGGC/HAVCR2/CSF2RB/LILRB2/IL10RA/AIF1/XRN1/CMPK2/VCAM1/TLR4/S100A14/IL15/PHEX/EEF2/TLR2/IL12B/HSD11B2/STAP1/MRC1/FLT3/PTGER2/EIF4EBP1/S100A7/PTGDR/TNF/ENDOG/S100A8/KLRK1/NDUFA13/NLRP3/KMO/PPARD/HCK/ARG1/P2RY6/NLRP7/CD6/TICAM2/CCL2/LTA/CLDN4/IL18/ZNF703/CD180/LY86/PTAFR/TNFRSF1B/EPO/DSG1/WNT11/TNFS…
GO:0030216	keratinocyte differentiation	75/2341	75	BP	298/17910	1.0109e-08	3.0646e-07	KRT17/KRT10/SFN/PI3/CNFN/KRT6B/TGM1/KRT1/KRT2/PKP1/ABCA12/FLG/KRT14/EVPL/KRT5/KRT16/KLK5/DSC3/DSP/S100A7/CERS3/CASP14/KRT6A/SPINK5/KLK13/PPL/KRT6C/JUP/HRNR/PRKCH/SPRR1B/KDF1/PRSS8/SPRR1A/PKP3/DSG1/GRHL2/IVL/DSC1/ACER1/SPRR2E/CDH3/KRT80/SPRR2A/GRHL1/KLK14/EREG/KRT15/BCL11B/OVOL2/CSTA/DSC2/DNASE1L2/TGM3/SPRR2D/IRF6/KRT78/TP63/DSG3/AQP3/KRT79/MSX2/POU3F1/SERPINB13/LCE2A/PERP/KRT19/KRT23/KRT7/SCEL/TG…
GO:0030888	regulation of B cell proliferation	25/2341	25	BP	57/17910	1.0316e-08	3.11631e-07	PTPRC/MNDA/CD38/FCRL3/IKZF3/TLR4/IL7/TNFSF13B/NCKAP1L/BTK/GPR183/MZB1/CD74/INPP5D/CARD11/CD300A/TYROBP/WNT3A/MIF/VAV3/FCGR2B/IL10/CTLA4/CHRNB2/IL13
GO:0065008	regulation of biological quality	583/2341	583	BP	3661/17910	1.06362e-08	3.20173e-07	STAT1/CXCL10/CXCL11/IRF1/CXCL9/GCH1/IFNG/B2M/PTPRC/PYHIN1/CCL8/CYBB/FASLG/CYLD/CCR5/SRGN/GRIN3A/CD38/CDC42SE2/CYSLTR1/CCL5/PLEK/SOD2/CCR2/CXCL13/ERAP1/GPR174/IL2RA/ZC3H12D/JAK2/SP100/MSR1/SMTNL1/SLC8A1/OAS2/P2RY12/CLIC2/PIK3CG/PSMB9/LYN/IFIT1/OAS1/NSMF/LILRB2/IL10RA/TRIM21/AIF1/SFN/LYZ/XRN1/ALOX12B/FLG2/FLI1/DOCK8/TLR4/IL7/TNFSF13B/NCKAP1L/IL7R/PSMB8/S100A14/UBA52/RPS5/PIK3R2/IL15/IKZF1/TNFRSF17/…
GO:0002709	regulation of T cell mediated immunity	26/2341	26	BP	61/17910	1.09496e-08	3.27302e-07	B2M/PTPRC/RSAD2/LILRB1/CCR2/TBX21/HLA-F/IL12RB1/HLA-E/IL7R/IL12B/XCL1/NLRP3/ARG1/IL18/SASH3/TNFRSF1B/IL18R1/TNFSF4/WAS/IL20RB/IL23R/FCGR2B/HLA-G/IL1B/GATA3
GO:0046635	positive regulation of alpha-beta T cell activation	26/2341	26	BP	61/17910	1.09496e-08	3.27302e-07	IFNG/PTPRC/CD80/CD86/CCR2/CD28/NCKAP1L/IL12RB1/HLA-E/EBI3/IL12B/CD160/XCL1/PRKCQ/NLRP3/RASAL3/SOCS1/IL18/SASH3/CD3E/TNFSF4/IL23R/LGALS9/ZAP70/IHH/CCL19
GO:2000501	regulation of natural killer cell chemotaxis	9/2341	9	BP	9/17910	1.09885e-08	3.2732e-07	CCL5/CCL4/XCL1/KLRK1/CCL2/CCL7/CCL3/KLRC4-KLRK1/CXCL14
GO:0051050	positive regulation of transport	183/2341	183	BP	942/17910	1.12957e-08	3.35302e-07	CXCL10/CXCL11/CD274/IFIH1/CXCL9/IFNG/PTPN22/CRTAM/B2M/PTPRC/PTGER4/DDX58/TLR8/CTSS/CD38/CCL5/CCL4/CCR2/RASGRP1/CD2/IL15RA/JAK2/P2RY12/HAVCR2/AIF1/SFN/HLA-F/ALOX12B/FPR2/DOCK2/TLR4/NCKAP1L/HLA-E/CLEC9A/IL2RB/PIK3R2/IL15/CLEC6A/TLR2/ABCA12/TLR1/GZMB/GLRX/CCR1/ATP2C2/RAB8B/RAB3A/GAL/CD244/HCLS1/STAP1/CLEC4E/CD160/AIM2/XCL1/GPI/C2/TNF/STAC3/TMSB4X/S100A8/LRRK2/CSF1R/NLRP3/JUP/NCS1/KMO/PPARD/TULP1/FCN…
GO:0012501	programmed cell death	351/2341	351	BP	2049/17910	1.26238e-08	3.7343e-07	STAT1/CXCL10/XAF1/IDO1/CD274/UBD/IRF1/IFNG/IFIT3/IFIT2/GPR65/PTPRC/BIRC3/TRIM69/TNFRSF9/CASP5/FASLG/CYLD/MNDA/CCR5/SRGN/DRAM1/LILRB1/CD3G/BCL2L14/CD38/TNFSF10/CCL5/KRT17/SOD2/CD2/IL2RA/TNFAIP8/GZMA/IKZF3/TLR3/JAK2/SP100/GIMAP8/KRT10/EAF2/PIK3CG/LYN/PRF1/GZMH/NAIP/EVI2B/NUGGC/NLRC4/NSMF/CD28/AIF1/SFN/PI3/KRT6B/DOCK8/TLR4/IL7/NCKAP1L/IL7R/IL2RB/S100A14/UBA52/TGM1/MLKL/PDCD1/BTK/KRT1/CASP7/TLR2/KRT2…
GO:0019882	antigen processing and presentation	60/2341	60	BP	220/17910	1.31473e-08	3.87574e-07	B2M/TAP1/CYBB/CTSS/FCGR1B/CD8A/MARCHF1/ERAP1/HLA-B/HLA-DOA/PSMB9/HLA-DRA/LILRB2/FCGR1A/HLA-F/HLA-C/LAG3/AP1M2/HLA-DMB/HLA-E/HLA-DPA1/PSMB8/TAP2/ERAP2/PSME2/CLEC4A/HLA-DRB1/RAB8B/HLA-DQA2/CD1D/HLA-DPB1/FGL2/HLA-DOB/HLA-DQA1/CD74/PSMB10/HLA-DQB1/HLA-DMA/SPTBN2/HLA-DRB5/HLA-H/LGMN/IFI30/TAPBPL/NCF2/NCF4/KIF26A/NOD2/WAS/HLA-DQB2/FCGR2B/CTSE/NCF1/CD209/CD207/CCR7/HLA-G/RAB3C/PSMA8/CCL19
GO:0097696	STAT cascade	46/2341	46	BP	150/17910	1.33464e-08	3.92092e-07	STAT1/PARP14/PARP9/IFNG/PTPRC/NMI/CCL5/CCR2/JAK2/STAT4/LYN/IL10RA/IL7R/IL15/IL12B/HCLS1/FLT3/TNF/CSF1R/SOCS1/CRLF1/CCL2/IL18/IFNL1/JAK3/TNFSF18/CD300A/EPO/FGFR3/CYP1B1/IL26/PTK6/IL23R/KIT/IL10/TSLP/IL31RA/IL22RA2/LIF/LEP/IL13/AGT/PRLR/DAB1/IL20/F2
GO:0035747	natural killer cell chemotaxis	10/2341	10	BP	11/17910	1.38823e-08	4.06438e-07	CCL5/CCL4/PIK3CG/XCL1/KLRK1/CCL2/CCL7/CCL3/KLRC4-KLRK1/CXCL14
GO:0046641	positive regulation of alpha-beta T cell proliferation	13/2341	13	BP	18/17910	1.42272e-08	4.15114e-07	PTPRC/CCR2/CD28/HLA-E/EBI3/IL12B/XCL1/RASAL3/IL18/CD3E/TNFSF4/LGALS9/ZAP70
GO:0034340	response to type I interferon	34/2341	34	BP	95/17910	1.45474e-08	4.23014e-07	STAT1/XAF1/IRF1/IFIT3/IFIT2/RSAD2/GBP2/NLRC5/SAMHD1/HLA-B/SP100/OAS2/IFIT1/IRF8/OAS1/HLA-F/HLA-C/HLA-E/PSMB8/IRF9/OASL/IFITM1/OAS3/MX1/USP18/HLA-H/IFI35/PTPN6/IFI6/ISG15/BST2/IRF6/HLA-G/IFI27
GO:0032680	regulation of tumor necrosis factor production	46/2341	46	BP	151/17910	1.67898e-08	4.86562e-07	IFIH1/PTPN22/PTPRC/CYBB/LILRB1/DDX58/NLRC3/CCR2/RASGRP1/SLAMF1/CD2/TLR3/JAK2/HAVCR2/TLR4/GPR18/HLA-E/TLR2/CLEC4A/TLR1/IL12B/MC1R/LRRK2/SPN/SASH3/HSPB1/CD33/PTAFR/PTPN6/TYROBP/GSTP1/MIF/NOD2/CCL3/GHRL/LILRA2/LGALS9/NFATC4/CX3CR1/LILRA5/IL10/AXL/CIDEA/PF4/LEP/CCL19
GO:0030666	endocytic vesicle membrane	48/2436	48	CC	161/18675	1.67945e-08	5.12791e-07	B2M/TAP1/CYBB/FCGR1B/HLA-B/MSR1/HLA-DRA/FCGR1A/HLA-F/HLA-C/HLA-E/HLA-DPA1/UBA52/TAP2/TLR2/HLA-DRB1/TLR1/RAB8B/HLA-DQA2/HLA-DPB1/CD163/HLA-DQA1/RAB23/CD74/HLA-DQB1/TLR6/HLA-DRB5/HLA-H/CORO1A/WNT3A/APOB/WNT6/RAB39A/RAC2/HLA-DQB2/NOS3/WNT7B/WNT3/RAB38/CD207/MARCO/WNT1/HLA-G/CACNG8/GRIA4/WNT4/CACNG4/WNT7A
GO:0042116	macrophage activation	34/2341	34	BP	96/17910	1.97179e-08	5.69489e-07	IFNG/PTPRC/TLR8/TLR7/TLR3/HAVCR2/AIF1/FPR2/TLR4/TLR2/TLR1/STAP1/TNF/LRRK2/CD74/CST7/IL33/TLR6/SUCNR1/C1QA/VSIG4/TYROBP/ITGB2/MIF/CCL3/ITGAM/FCGR2B/TTBK1/EDN2/IL10/SLC7A2/IL31RA/SPACA3/IL13
GO:0046633	alpha-beta T cell proliferation	17/2341	17	BP	30/17910	1.97952e-08	5.69796e-07	CD274/IRF1/PTPRC/CCR2/CD28/DOCK2/HLA-E/EBI3/IL15/IL12B/XCL1/RASAL3/IL18/CD3E/TNFSF4/LGALS9/ZAP70
GO:0070098	chemokine-mediated signaling pathway	23/2341	23	BP	51/17910	2.09232e-08	6.00244e-07	CXCL10/CXCL11/CCR5/CCL5/CCR2/CCR8/CXCR6/CCR4/CCR1/CCR3/CXCR3/CMKLR1/CCR9/XCR1/CCRL2/CCR6/CXCL12/CXCR4/CX3CR1/CXCR2/CCR7/CXCR1/CXCR5
GO:1903708	positive regulation of hemopoiesis	52/2341	52	BP	182/17910	2.25896e-08	6.45881e-07	STAT1/IFNG/PTPRC/CD80/CYLD/CD86/RASGRP1/IL2RA/EVI2B/LILRB2/IL7/NCKAP1L/IL12RB1/IL7R/IL15/TESPA1/BTK/CD27/CCR1/IL12B/VNN1/HCLS1/TNF/TOX/CD74/LILRB4/INPP5D/NLRP3/CSF1/RHEX/SOCS1/IL18/SASH3/TYROBP/TNFSF4/ISG15/CD4/PIK3R6/IL23R/LGALS9/ZAP70/TNFSF11/ADAM8/IHH/HLA-G/AXL/GATA3/PF4/LIF/POU4F1/CCL19/IL20
GO:0072678	T cell migration	25/2341	25	BP	59/17910	2.41592e-08	6.88457e-07	CXCL10/CXCL11/CCL5/CCR2/CXCL13/PIK3CG/AIF1/CD200R1/DOCK8/TNFSF14/GPR183/S100A7/CXCR3/XCL1/SPN/CCL2/GPR15/CCL3/MYO1G/ITGB7/CCR6/ZAP70/CXCL12/ADAM8/RIPOR2
GO:0042531	positive regulation of tyrosine phosphorylation of STAT protein	27/2341	27	BP	67/17910	2.44849e-08	6.95419e-07	PARP14/PARP9/IFNG/CCL5/JAK2/LYN/IL15/IL12B/HCLS1/FLT3/TNF/CSF1R/CRLF1/IL18/IFNL1/TNFSF18/EPO/FGFR3/PTK6/IL23R/KIT/TSLP/IL31RA/LIF/LEP/IL13/IL20
GO:0050854	regulation of antigen receptor-mediated signaling pathway	26/2341	26	BP	63/17910	2.46479e-08	6.97732e-07	GBP1/PTPN22/TRAT1/PTPRC/CYLD/FCRL3/CD226/LYN/TESPA1/PLCL2/RPS3/STAP1/LCK/CD160/LILRB4/PRKCH/PRKCB/CD300A/PTPN6/GCSAM/FCGR2B/NFAM1/CD19/CCR7/PAX5/BLK
GO:0002548	monocyte chemotaxis	21/2341	21	BP	44/17910	2.49035e-08	7.0264e-07	CXCL10/CCL5/CCR2/LYN/AIF1/FPR2/S100A14/RPS19/CCR1/S100A7/SLAMF8/CCL2/CCL7/LGMN/PTPRO/CCL3/S100A12/CXCL12/TNFSF11/PLA2G7/CCL1
GO:0032879	regulation of localization	442/2341	442	BP	2688/17910	2.50347e-08	7.04019e-07	GBP1/CXCL10/CXCL11/AKAP5/CD274/IFIH1/TRIM22/DTX3L/PARP9/CXCL9/IFNG/PTPN22/CRTAM/TRAT1/B2M/PTPRC/RSAD2/PYHIN1/CCL8/CYBB/FASLG/CYLD/CCR5/SRGN/PTGER4/LILRB1/DDX58/TLR8/GRIN3A/CTSS/CD38/CCL5/SOD2/CCL4/CCR2/CXCL13/RASGRP1/FCRL3/CD84/CD2/IL15RA/JAK2/SP100/MSR1/SLC8A1/OAS2/P2RY12/CLIC2/PIK3CG/LYN/PROM2/TLR10/HAVCR2/NSMF/LILRB2/AIF1/SFN/HLA-F/CD200R1/ALOX12B/FPR2/DOCK2/DOCK8/TLR4/NCKAP1L/GPR18/HLA-E/EPPK…
GO:1904892	regulation of STAT cascade	41/2341	41	BP	129/17910	2.62317e-08	7.35261e-07	PARP14/PARP9/IFNG/PTPRC/CCL5/JAK2/LYN/IL10RA/IL7R/IL15/IL12B/HCLS1/FLT3/TNF/CSF1R/SOCS1/CRLF1/IL18/IFNL1/JAK3/TNFSF18/CD300A/EPO/FGFR3/CYP1B1/IL26/PTK6/IL23R/KIT/IL10/TSLP/IL31RA/IL22RA2/LIF/LEP/IL13/AGT/PRLR/DAB1/IL20/F2
GO:0030855	epithelial cell differentiation	150/2341	150	BP	746/17910	2.65909e-08	7.42895e-07	STAT1/IFNG/KRT17/KRT10/NEUROG3/SFN/PI3/CNFN/KRT6B/RAB25/TGM1/KRT1/KRT2/PKP1/ABCA12/FLG/KRT14/SULT2B1/EVPL/PRDM1/KRT5/KRT16/KLK5/DSC3/CAMSAP3/DLX3/DSP/S100A7/CERS3/CASP14/KRT6A/JAG2/TNF/MYO7A/SPINK5/KLK13/PPL/KRT6C/CCDC78/AJAP1/PPP1R16B/JUP/SCX/HRNR/PRKCH/SPRR1B/ID1/ETV2/ZNF703/KDF1/PRSS8/SPRR1A/PKP3/DSG1/WNT11/GRHL2/IVL/PTPRO/DSC1/ACER1/SPRR2E/DLX5/RHCG/CDH3/KRT80/PTK7/FN3K/KLF5/FRZB/ESR1/TST/SPR…
GO:0002702	positive regulation of production of molecular mediator of immune response	33/2341	33	BP	93/17910	3.00891e-08	8.37888e-07	B2M/PTPRC/RSAD2/LILRB1/DDX58/TBX21/CD28/HLA-F/TLR4/HLA-E/CD244/KIR2DL4/KLK5/CD160/XCL1/GPI/MZB1/CD74/NLRP3/KLK7/IL33/IL18/SASH3/IL18R1/TNFSF4/MIF/NOD2/HLA-G/RAET1G/IL1B/GATA3/RBP4/IL13
GO:0050766	positive regulation of phagocytosis	25/2341	25	BP	60/17910	3.62936e-08	1.00088e-06	PTPRC/IL15RA/FPR2/DOCK2/NCKAP1L/IL2RB/IL15/STAP1/C2/TNF/TULP1/IL2RG/CCL2/SFTPD/CD300LF/C4B/FCGR2B/APOA1/C3/IL1B/C4A/PTX3/SPACA3/APOA2/MBL2
GO:1990868	response to chemokine	25/2341	25	BP	60/17910	3.62936e-08	1.00088e-06	CXCL10/CXCL11/CCR5/CCL5/CCR2/CCR8/CXCR6/DOCK8/CCR4/CCR1/CCR3/CXCR3/CMKLR1/CCR9/XCR1/CCRL2/CCR6/CXCL12/CXCR4/CX3CR1/CXCR2/RIPOR2/CCR7/CXCR1/CXCR5
GO:1990869	cellular response to chemokine	25/2341	25	BP	60/17910	3.62936e-08	1.00088e-06	CXCL10/CXCL11/CCR5/CCL5/CCR2/CCR8/CXCR6/DOCK8/CCR4/CCR1/CCR3/CXCR3/CMKLR1/CCR9/XCR1/CCRL2/CCR6/CXCL12/CXCR4/CX3CR1/CXCR2/RIPOR2/CCR7/CXCR1/CXCR5
GO:0032640	tumor necrosis factor production	46/2341	46	BP	155/17910	4.08798e-08	1.12373e-06	IFIH1/PTPN22/PTPRC/CYBB/LILRB1/DDX58/NLRC3/CCR2/RASGRP1/SLAMF1/CD2/TLR3/JAK2/HAVCR2/TLR4/GPR18/HLA-E/TLR2/CLEC4A/TLR1/IL12B/MC1R/LRRK2/SPN/SASH3/HSPB1/CD33/PTAFR/PTPN6/TYROBP/GSTP1/MIF/NOD2/CCL3/GHRL/LILRA2/LGALS9/NFATC4/CX3CR1/LILRA5/IL10/AXL/CIDEA/PF4/LEP/CCL19
GO:0002707	negative regulation of lymphocyte mediated immunity	19/2341	19	BP	38/17910	4.4472e-08	1.21856e-06	PTPRC/LILRB1/TBX21/CD96/HAVCR2/HLA-F/HLA-E/IL7R/KIR2DL4/XCL1/CR1/ARG1/PTPN6/IL20RB/FOXJ1/LGALS9/FCGR2B/SERPINB9/HLA-G
GO:0035710	CD4-positive, alpha-beta T cell activation	32/2341	32	BP	90/17910	4.59163e-08	1.25412e-06	CD274/IFNG/RSAD2/CD80/PTGER4/CD86/TBX21/SLAMF6/IL27/NCKAP1L/IL12RB1/PLA2G2D/IL12B/GPR183/CD160/XCL1/PRKCQ/NLRP3/SPN/SOCS1/IL18/SASH3/JAK3/IL18R1/TNFSF4/LY9/IL23R/LGALS9/GATA3/RORC/CCL19/PAX1
GO:0035589	G protein-coupled purinergic nucleotide receptor signaling pathway	11/2341	11	BP	14/17910	4.63643e-08	1.26232e-06	GPR171/P2RY10/P2RY12/P2RY13/P2RY14/GPR34/P2RY8/P2RY6/PTAFR/GPR87/P2RY2
GO:0060429	epithelium development	228/2341	228	BP	1251/17910	4.9299e-08	1.33796e-06	STAT1/CXCL10/IFNG/KRT17/JAK2/KRT10/PSMB9/NEUROG3/SFN/FLG2/PI3/CNFN/KRT6B/EPPK1/PSMB8/RAB25/TGM1/PSME2/KRT1/KRT2/PKP1/ABCA12/FLG/KRT14/SULT2B1/EVPL/PRDM1/ATP2C2/KRT5/GAL/KRT16/ESRP2/KLK5/DSC3/TACSTD2/CAMSAP3/APCDD1/SLC40A1/ZNF358/DLX3/DSP/S100A7/CERS3/CASP14/KRT6A/JAG2/SEMA4C/TNF/MYO7A/FOXQ1/SPINK5/CSF1R/KLK13/PPL/RDH10/KRT6C/CCDC78/AJAP1/PPP1R16B/JUP/PSMB10/SCX/HRNR/PRKCH/CSF1/SPRR1B/ID1/CRLF1/NK…
GO:0045597	positive regulation of cell differentiation	183/2341	183	BP	962/17910	5.51482e-08	1.49197e-06	STAT1/CXCL9/IFNG/PTPRC/CD80/CYLD/CD86/SOD2/CCR2/RASGRP1/IL2RA/JAK2/MSR1/P2RY12/LYN/EVI2B/NSMF/NEUROG3/LILRB2/SFN/CD53/IL7/NCKAP1L/IL12RB1/IL7R/IL15/TESPA1/CASS4/CPEB3/BTK/TLR2/CD27/SEMA4D/CCR1/SULT2B1/TNFSF14/IL12B/IFITM1/VNN1/HCLS1/DUOXA1/SF3A2/CMKLR1/TNF/TOX/CD74/S100A9/LILRB4/LRP5/INPP5D/NLRP3/RAC3/PPARD/PRKCH/DBN1/CSF1/RHEX/SOCS1/CRABP2/LTA/ETV2/IL18/ZNF703/KDF1/SASH3/SHANK1/IRX3/C1QA/TNFRSF1…
GO:0042088	T-helper 1 type immune response	20/2341	20	BP	42/17910	5.62639e-08	1.51258e-06	CD80/CCR2/IL18RAP/HAVCR2/IL27/TLR4/IL12RB1/EBI3/IL12B/IL18BP/XCL1/SPN/IL33/IL18/JAK3/IL18R1/TNFSF4/IL23R/IL1B/CCL19
GO:0048247	lymphocyte chemotaxis	20/2341	20	BP	42/17910	5.62639e-08	1.51258e-06	CXCL10/CXCL11/CCL5/CCL4/CCR2/CXCL13/PIK3CG/TNFSF14/GPR183/S100A7/CXCR3/XCL1/KLRK1/CCL2/CCL7/CCL3/ADAM8/KLRC4-KLRK1/SAA1/CXCL14
GO:0007260	tyrosine phosphorylation of STAT protein	30/2341	30	BP	82/17910	5.72282e-08	1.53368e-06	PARP14/PARP9/IFNG/CCL5/JAK2/LYN/IL15/IL12B/HCLS1/FLT3/TNF/CSF1R/SOCS1/CRLF1/IL18/IFNL1/JAK3/TNFSF18/EPO/FGFR3/PTK6/IL23R/KIT/TSLP/IL31RA/IL22RA2/LIF/LEP/IL13/IL20
GO:0006508	proteolysis	287/2341	287	BP	1645/17910	6.06861e-08	1.62127e-06	UBD/LAP3/IFIH1/DTX3L/IFNG/TNIP3/BIRC3/PYHIN1/CASP5/FASLG/CYLD/SRGN/DDX58/CTSS/GZMK/TNFSF10/ERAP1/ADAM28/TNFAIP8/GZMA/JAK2/TBX21/SLPI/CR1L/PSMB9/LYN/GZMH/NAIP/RNF213/EFNA3/NLRC4/ADAMDEC1/TRIM21/SFN/PI3/IGKV2-29/CFB/ASPRV1/UBA7/IGKV4-1/PSMB8/UBA52/IGLV3-19/PHEX/CLCA2/IGHV3-23/PSME2/CASP7/KLK10/GZMB/CD27/TNFSF14/IGLV2-11/IGKV1-16/RPS3/CBLC/KLK5/IGHV3-13/IGKV2-30/IGHV4-39/FGL2/IGHV3-30/HSPBP1/LCK/IGK…
GO:0098805	whole membrane	278/2436	278	CC	1586/18675	5.74023e-08	1.69614e-06	AKAP5/CD274/DTX3L/B2M/PTPRC/RSAD2/BIRC3/ABCD2/TAP1/CYBB/FASLG/GIMAP5/DRAM1/TLR8/CD3G/FCGR1B/CD38/CD8A/TLR7/LRMP/MARCHF1/HLA-B/CD2/ACSL5/HLA-DOA/TLR3/JAK2/MSR1/ATP8B4/P2RY12/CD226/LYN/HLA-DRA/PROM2/CD48/LILRB2/SNX20/FCGR1A/HLA-F/HLA-C/FPR2/CD8B/AP1M2/SLA2/CD53/TLR4/NCKAP1L/RHOV/BSG/HLA-DMB/HLA-E/IL7R/HLA-DPA1/UBA52/TAP2/SLC9A9/BTK/EEF2/TLR2/PKP1/HLA-DRB1/TLR1/CD3D/CLEC12A/FGD2/RAB8B/RAB3A/HLA-DQA2…
GO:0043367	CD4-positive, alpha-beta T cell differentiation	28/2341	28	BP	74/17910	6.82712e-08	1.81822e-06	IFNG/RSAD2/CD80/PTGER4/CD86/TBX21/SLAMF6/IL27/NCKAP1L/IL12RB1/PLA2G2D/IL12B/GPR183/NLRP3/SPN/SOCS1/IL18/SASH3/JAK3/IL18R1/TNFSF4/LY9/IL23R/LGALS9/GATA3/RORC/CCL19/PAX1
GO:0007186	G protein-coupled receptor signaling pathway	202/2341	202	BP	1087/17910	6.9307e-08	1.84008e-06	CXCL10/CXCL11/AKAP5/CXCL9/GPR171/GPR65/OR2I1P/CCR5/RGS18/P2RY10/PTGER4/GPR141/CYSLTR1/CCL5/PLEK/CCL4/CCR2/CXCL13/XCL2/CCR8/JAK2/P2RY12/P2RY13/PIK3CG/CXCR6/P2RY14/GPR82/FPR2/GPR31/GPR18/BTK/FPR3/OR52N4/GPR34/CCR4/FGD2/CCR1/SSTR2/TSHR/GPBAR1/PLCL2/CCR3/GAL/RAPGEFL1/KLK5/GPR183/VAV1/FFAR4/KLF16/ADGRG5/PTGER2/GNGT2/C3AR1/CXCR3/XCL1/CMKLR1/ADGRE1/PTGDR/MC1R/CCR9/XCR1/LRRK2/NECAB2/CCL25/ADGRF3/CCRL2/GP…
GO:0032633	interleukin-4 production	17/2341	17	BP	32/17910	7.20889e-08	1.90801e-06	CLECL1/CD86/ITK/HAVCR2/CD28/HLA-E/PRKCQ/NLRP3/IL33/SASH3/CD3E/TNFSF4/IL20RB/LGALS9/CD40LG/GATA3/VTCN1
GO:0002292	T cell differentiation involved in immune response	26/2341	26	BP	66/17910	7.67974e-08	2.02636e-06	IFNG/CD80/PTGER4/CD86/TBX21/SLAMF6/IL27/IL12RB1/IL12B/CLEC4E/GPR183/NLRP3/SPN/IL18/CLEC4D/IFNL1/JAK3/IL18R1/TNFSF4/LY9/EOMES/IL23R/LGALS9/GATA3/RORC/CCL19
GO:0098772	molecular function regulator	261/2173	261	MF	1492/16967	3.11343e-08	2.26191e-06	CXCL10/CXCL11/DTX3L/PARP9/CXCL9/CCL8/FASLG/RGS18/TNFSF10/CCL5/CCL4/CXCL13/RASGRP1/TNFAIP8/TAGAP/P2RY12/SLPI/NAIP/TNFSF8/WARS1/SFN/PI3/RHOH/DOCK2/IL27/DOCK8/IL7/TNFSF13B/NCKAP1L/EBI3/ARHGAP25/ARHGAP9/IL15/DOCK11/ARHGAP15/CD27/MLST8/FGD2/ARHGDIG/TNFSF14/IL12B/ARHGAP18/RAB3A/GAL/RGL4/ARAP2/RAPGEFL1/MYBPC3/VAV1/HSPBP1/IL18BP/GPSM1/ELFN2/XCL1/JAG2/GPI/TNF/LRRK2/SPINK5/A2ML1/CST6/SECTM1/CCL25/CST7/ACAP…
GO:0051094	positive regulation of developmental process	246/2341	246	BP	1378/17910	8.68347e-08	2.28276e-06	STAT1/IDO1/CD274/CXCL9/IFNG/PTPRC/CD80/CYBB/CYLD/CD86/KRT17/SOD2/CCR2/RASGRP1/ERAP1/IL2RA/TLR3/JAK2/MSR1/SLC8A1/TBX21/P2RY12/KRT10/LYN/EVI2B/NSMF/NEUROG3/LILRB2/CD28/SFN/CD53/IL7/TNFSF13B/NCKAP1L/IL12RB1/IL7R/IL15/TESPA1/CASS4/CPEB3/BTK/TLR2/KRT2/CD27/SEMA4D/CCR1/SULT2B1/TNFSF14/IL12B/IFITM1/CCR3/GAL/VNN1/HCLS1/KIR2DL4/DUOXA1/SF3A2/C3AR1/CMKLR1/TNF/CGAS/TOX/CD74/CST7/S100A9/LILRB4/LRP5/INPP5D/NLR…
GO:0042509	regulation of tyrosine phosphorylation of STAT protein	29/2341	29	BP	79/17910	8.70488e-08	2.28276e-06	PARP14/PARP9/IFNG/CCL5/JAK2/LYN/IL15/IL12B/HCLS1/FLT3/TNF/CSF1R/SOCS1/CRLF1/IL18/IFNL1/TNFSF18/EPO/FGFR3/PTK6/IL23R/KIT/TSLP/IL31RA/IL22RA2/LIF/LEP/IL13/IL20
GO:0071556	integral component of lumenal side of endoplasmic reticulum membrane	16/2436	16	CC	29/18675	8.44917e-08	2.34528e-06	HLA-B/HLA-DRA/HLA-F/HLA-C/HLA-E/HLA-DPA1/HLA-DRB1/HLA-DQA2/HLA-DPB1/HLA-DQA1/CD74/HLA-DQB1/HLA-DRB5/HLA-H/HLA-DQB2/HLA-G
GO:0098553	lumenal side of endoplasmic reticulum membrane	16/2436	16	CC	29/18675	8.44917e-08	2.34528e-06	HLA-B/HLA-DRA/HLA-F/HLA-C/HLA-E/HLA-DPA1/HLA-DRB1/HLA-DQA2/HLA-DPB1/HLA-DQA1/CD74/HLA-DQB1/HLA-DRB5/HLA-H/HLA-DQB2/HLA-G
GO:0023023	MHC protein complex binding	15/2173	15	MF	25/16967	3.60776e-08	2.49622e-06	KLRD1/LILRB1/CD8A/HLA-DOA/KLRC1/HLA-DRA/LILRB2/HLA-DMB/HLA-DRB1/HLA-DOB/CD160/CD74/MS4A1/HLA-DMA/TAPBPL
GO:0002218	activation of innate immune response	76/2341	76	BP	319/17910	9.68805e-08	2.53282e-06	DDX60/IFIH1/IRF1/PTPN22/RSAD2/TNIP3/BIRC3/PYHIN1/CYLD/MNDA/CLEC7A/DDX58/TLR8/CTSS/TLR7/ACOD1/FCRL3/TLR3/PIK3AP1/PSMB9/LYN/TLR10/HAVCR2/NLRC4/TLR4/PSMB8/S100A14/UBA52/CLEC6A/BTK/PSME2/TLR2/CLEC4A/TLR1/TIFA/CLEC4E/AIM2/CGAS/S100A8/KLRK1/S100A9/PSMB10/HCK/FCN1/CLEC4C/CARD11/TICAM2/MUCL1/TLR6/DHX58/CLEC4D/CLEC10A/LGMN/NLRX1/CD300A/SFTPD/ITGB2/CD300LF/PGLYRP4/IRAK2/APOB/NOD2/ITGAM/PLCG2/NLRP6/GFI1/ESR…
GO:0002507	tolerance induction	15/2341	15	BP	26/17910	9.91997e-08	2.56987e-06	IDO1/CD274/ICOS/ACOD1/IL2RA/LYN/HAVCR2/LILRB2/HLA-E/PDCD1/CCR4/CD3E/FOXJ1/LGALS9/HLA-G
GO:0002825	regulation of T-helper 1 type immune response	15/2341	15	BP	26/17910	9.91997e-08	2.56987e-06	CD80/CCR2/HAVCR2/IL27/IL12RB1/IL12B/XCL1/IL33/IL18/JAK3/IL18R1/TNFSF4/IL23R/IL1B/CCL19
GO:0033561	regulation of water loss via skin	15/2341	15	BP	26/17910	9.91997e-08	2.56987e-06	SFN/ALOX12B/FLG2/KRT1/ABCA12/FLG/KRT16/ALOXE3/HRNR/CLDN4/KDF1/ACER1/GRHL3/GRHL1/TP63
GO:0050921	positive regulation of chemotaxis	40/2341	40	BP	130/17910	1.04414e-07	2.69677e-06	CXCL10/CCL5/CCL4/CCR2/CXCL13/P2RY12/AIF1/FPR2/NCKAP1L/S100A14/CCR4/CCR1/TNFSF14/S100A7/C3AR1/XCL1/CMKLR1/TMSB4X/CD74/CSF1/CCL7/HSPB1/SUCNR1/LGMN/CCL3/RAC2/EDN3/LGALS9/F7/CXCL12/CXCR4/CXCR2/EDN2/RIPOR2/CDH13/CCR7/PLA2G7/CCL1/CXCL14/CCL19
GO:0032753	positive regulation of interleukin-4 production	14/2341	14	BP	23/17910	1.05066e-07	2.69732e-06	CD86/HAVCR2/CD28/HLA-E/PRKCQ/NLRP3/IL33/SASH3/CD3E/TNFSF4/IL20RB/LGALS9/CD40LG/GATA3
GO:0061436	establishment of skin barrier	14/2341	14	BP	23/17910	1.05066e-07	2.69732e-06	SFN/ALOX12B/FLG2/KRT1/ABCA12/FLG/KRT16/ALOXE3/HRNR/CLDN4/KDF1/GRHL3/GRHL1/TP63
GO:0045123	cellular extravasation	24/2341	24	BP	59/17910	1.17647e-07	3.01127e-06	PTGER4/CCR2/PIK3CG/VCAM1/GCNT1/TNF/CCL25/JAML/SPN/CCL2/SELL/PTAFR/ITGB2/ITGB7/SELPLG/CXCL12/PODXL2/CX3CR1/ADAM8/RIPOR2/SELE/PRTN3/ADD2/LEP
GO:0002824	positive regulation of adaptive immune response based on somatic recombination of immune receptors built from immunoglobulin superfamily domains	31/2341	31	BP	89/17910	1.27306e-07	3.24878e-06	CD274/B2M/PTPRC/RSAD2/CD80/CCR2/TBX21/CD226/CD28/HLA-F/TNFSF13B/IL12RB1/HLA-E/BTK/IL12B/XCL1/TNF/PRKCQ/NLRP3/LTA/IL18/SASH3/IL18R1/TNFSF4/CD4/IL23R/FCER2/C3/IL1B/GATA3/CCL19
GO:0002821	positive regulation of adaptive immune response	32/2341	32	BP	94/17910	1.47563e-07	3.75438e-06	CD274/B2M/PTPRC/RSAD2/CD80/CCR2/TBX21/CD226/CD28/HLA-F/TNFSF13B/IL12RB1/HLA-E/BTK/IL12B/XCL1/TNF/PRKCQ/NLRP3/LTA/IL18/SASH3/IL18R1/TNFSF4/CD4/IL23R/FCER2/SKAP1/C3/IL1B/GATA3/CCL19
GO:0043900	regulation of multi-organism process	91/2341	91	BP	408/17910	1.47997e-07	3.75438e-06	STAT1/DDX60/DTX3L/PARP9/IFNG/RSAD2/BIRC3/CCL8/LILRB1/DDX58/CCL5/ACOD1/CCL4/IFIT5/IL2RA/APOBEC3G/SLPI/IFIT1/PRF1/IRF8/HAVCR2/OAS1/CD28/TRIM21/IL27/IL12RB1/IL15/POLR2I/OASL/SIGLEC11/IL12B/IFITM1/APOBEC3D/RESF1/KLK5/FGL2/POU2F3/AIM2/OAS3/KRT6A/TRIM14/TNF/CGAS/MX1/SPINK5/CD74/SIGLEC16/LAMP3/ARG1/FCN1/PAEP/KLK7/LTA/DHX58/CD180/ARHGDIB/LY86/PTAFR/NLRX1/APOBEC3A/SFTPD/APOBEC3F/HERC5/PGLYRP4/CACNA1H/APOB…
GO:0008284	positive regulation of cell proliferation	176/2341	176	BP	931/17910	1.55837e-07	3.93469e-06	STAT1/CXCL10/CD274/IFNG/PTPRC/FASLG/CLECL1/CD86/CD38/CCL5/CCR2/FCRL3/SLAMF1/IL2RA/JAK2/LYN/HAVCR2/LILRB2/CD28/AIF1/VCAM1/TLR4/IL7/TNFSF13B/NCKAP1L/HLA-DMB/IL12RB1/HLA-E/EBI3/IL7R/HLA-DPA1/RAB25/TGM1/IL15/IL12B/TSHR/CCR3/RPS3/SPTA1/ESRP2/HCLS1/CD1D/SIRPG/HLA-DPB1/GPR183/FLT3/PLAC8/XCL1/KRT6A/TNF/PRKCQ/EGFL7/CSF1R/MZB1/CD74/JAML/LRP5/RASAL3/CCDC88B/PPP1R16B/SOX15/SCX/PPARD/HCK/ARG1/PRKCH/P2RY6/CSF1…
GO:0071674	mononuclear cell migration	26/2341	26	BP	68/17910	1.56025e-07	3.93469e-06	CXCL10/CCL5/CCR2/LYN/AIF1/FPR2/S100A14/RPS19/CCR1/S100A7/C3AR1/CMKLR1/TNF/SLAMF8/JAML/CSF1/CCL2/CCL7/LGMN/PTPRO/CCL3/S100A12/CXCL12/TNFSF11/PLA2G7/CCL1
GO:0002720	positive regulation of cytokine production involved in immune response	22/2341	22	BP	52/17910	1.71871e-07	4.32155e-06	B2M/RSAD2/LILRB1/DDX58/HLA-F/TLR4/HLA-E/KIR2DL4/CD160/XCL1/CD74/NLRP3/IL18/SASH3/IL18R1/TNFSF4/MIF/NOD2/HLA-G/RAET1G/IL1B/GATA3
GO:0042379	chemokine receptor binding	21/2173	21	MF	47/16967	7.31867e-08	4.83365e-06	STAT1/CXCL10/CXCL11/CXCL9/CCL5/CCL4/CCR2/CXCL13/S100A14/XCL1/CCL25/CCRL2/DEFB1/CCL2/CCL7/CCL3/CXCL12/CCL1/PF4/CXCL14/CCL19
GO:0036336	dendritic cell migration	15/2341	15	BP	27/17910	1.96161e-07	4.90344e-06	CCR5/CCL5/CCR2/PIK3CG/DOCK8/CCR1/GPR183/SLAMF8/CCR6/LGALS9/CXCR4/CXCR2/CCR7/CXCR1/CCL19
GO:0046640	regulation of alpha-beta T cell proliferation	15/2341	15	BP	27/17910	1.96161e-07	4.90344e-06	CD274/IRF1/PTPRC/CCR2/CD28/HLA-E/EBI3/IL12B/XCL1/RASAL3/IL18/CD3E/TNFSF4/LGALS9/ZAP70
GO:0042221	response to chemical	692/2341	692	BP	4520/17910	2.02414e-07	5.03958e-06	GBP1/STAT1/CXCL10/CXCL11/PARP14/XAF1/IDO1/CD274/GBP5/GBP4/UBD/IFIH1/TRIM22/IRF1/PARP9/CXCL9/GCH1/IFNG/PTPN22/IFIT3/B2M/IFIT2/PTPRC/RSAD2/GBP3/TNIP3/BIRC3/OR2I1P/PYHIN1/CCL8/CD80/TNFRSF9/GBP2/CYBB/FASLG/CYLD/MNDA/CD69/CCR5/NMI/IPCEF1/NLRC5/CLEC7A/PTGER4/LILRB1/DDX58/GRIN3A/CTSS/SAMHD1/FCGR1B/CD86/CD38/TNFSF10/CYSLTR1/CCL5/CIITA/ACOD1/SOD2/CCL4/CCR2/CXCL13/HLA-B/CCR8/IL2RA/IL18RAP/IL15RA/TLR3/JAK2/…
GO:0043269	regulation of ion transport	129/2341	129	BP	639/17910	2.02786e-07	5.03958e-06	CXCL10/CXCL11/CXCL9/IFNG/B2M/CYBB/LILRB1/CTSS/CCL5/CCL4/CCR2/FCRL3/CD84/SLC8A1/P2RY12/CLIC2/PIK3CG/LYN/LILRB2/GLRX/CCR1/ATP2C2/GAL/XCL1/JPH3/STAC3/CLIC5/TMSB4X/CBARP/KMO/ARG1/P2RY6/CCL2/SCN5A/CNIH2/SHANK1/CD33/PTAFR/PTPN6/CORO1A/EPO/KCNE1/CACNA1H/KCNA3/CRHR1/KCNQ2/MIF/KCNK7/ABCB1/KCNU1/CCL3/KCNIP3/FABP3/PLCG2/CD4/CHRNA6/CHCHD10/LILRA2/GPER1/CACNA1G/CHRNA3/TCAF2/TPCN2/SLC34A1/EDN3/CXCL12/P2RX1/NOS…
GO:0032395	MHC class II receptor activity	9/2173	9	MF	10/16967	8.08774e-08	5.10934e-06	KRT17/HLA-DOA/HLA-DRA/HLA-DPA1/HLA-DQA2/HLA-DOB/HLA-DQA1/HLA-DQB1/HLA-DQB2
GO:0090026	positive regulation of monocyte chemotaxis	12/2341	12	BP	18/17910	2.09374e-07	5.18822e-06	CXCL10/CCL5/CCR2/AIF1/FPR2/S100A14/CCR1/S100A7/LGMN/CXCL12/PLA2G7/CCL1
GO:0006811	ion transport	267/2341	267	BP	1533/17910	2.17322e-07	5.36962e-06	CXCL10/CXCL11/CALHM6/APOL1/CXCL9/IFNG/B2M/PTPRC/CCL8/CYBB/FASLG/CCR5/LILRB1/GRIN3A/CTSS/CYSLTR1/CCL5/CCL4/CCR2/FCRL3/CD84/SLC8A1/P2RY12/CLIC2/PIK3CG/LYN/LILRB2/PLA2G2D/ATP5F1D/SLC9A9/CLCA2/BTK/SLC12A3/ABCA12/GLRX/SLC38A8/CCR1/NECTIN1/MFSD3/ATP2C2/RAB3A/GAL/TTYH3/PLA2G4F/SLC40A1/LCK/SLC15A1/SLC19A1/XCL1/JPH3/STAC3/CLIC5/CPLX1/TMSB4X/MTCO2P12/CBARP/SLC1A6/MS4A1/ATP12A/SLC7A7/SCNN1A/NCS1/SLC27A4/KMO…
GO:2000106	regulation of leukocyte apoptotic process	29/2341	29	BP	82/17910	2.21184e-07	5.44686e-06	IDO1/CD274/CCR5/LILRB1/CD3G/CCL5/GIMAP8/LYN/DOCK8/IL7R/PDCD1/BTK/CD27/HCLS1/PRKCQ/CD74/JAK3/MIF/NOD2/LGALS9/CXCL12/ADAM8/CXCR2/IL10/CCR7/AXL/HCAR2/BIRC7/CCL19
GO:0002407	dendritic cell chemotaxis	14/2341	14	BP	24/17910	2.21723e-07	5.44686e-06	CCR5/CCL5/CCR2/PIK3CG/CCR1/GPR183/SLAMF8/CCR6/LGALS9/CXCR4/CXCR2/CCR7/CXCR1/CCL19
GO:0018149	peptide cross-linking	17/2341	17	BP	34/17910	2.29309e-07	5.61709e-06	KRT10/PI3/TGM1/KRT1/KRT2/FLG/EVPL/DSP/SPRR1B/SPOCK2/SPRR1A/IVL/SPRR2E/CSTA/TGM3/F13A1/TGM5
GO:0002820	negative regulation of adaptive immune response	20/2341	20	BP	45/17910	2.34412e-07	5.72568e-06	SAMSN1/PTPRC/LILRB1/TBX21/HAVCR2/HLA-F/IL7R/CD160/XCL1/CR1/ARG1/IL33/JAK3/PTPN6/TNFSF4/IL20RB/FOXJ1/FCGR2B/HLA-G/ALOX15
GO:0051241	negative regulation of multicellular organismal process	228/2341	228	BP	1276/17910	2.50727e-07	6.10673e-06	GBP1/STAT1/CXCL10/PDCD1LG2/IDO1/CD274/IFIH1/IRF1/IFNG/PTPN22/GPR171/B2M/PTPRC/ABCD2/TIGIT/FASLG/CYLD/NMI/NLRC5/SRGN/PTGER4/LILRB1/DDX58/TLR8/CD38/ACOD1/NLRC3/CCR2/CXCL13/CD84/SLAMF1/TLR3/JAK2/SP100/TBX21/EAF2/PIK3CG/CD96/LYN/EFNA3/HAVCR2/HLA-F/CD200R1/UBE2L6/LAG3/UBA7/TLR4/NCKAP1L/GPR18/EPPK1/IL15/PDCD1/BTK/KRT1/RPS19/TLR2/CLEC4A/SEMA4D/CCR1/BANK1/IL12B/PLCL2/GAL/TACSTD2/STAP1/PLAC8/FFAR4/CD160/X…
GO:0002758	innate immune response-activating signal transduction	71/2341	71	BP	298/17910	2.52788e-07	6.13945e-06	DDX60/IFIH1/IRF1/PTPN22/RSAD2/TNIP3/BIRC3/CYLD/CLEC7A/DDX58/TLR8/CTSS/TLR7/ACOD1/FCRL3/TLR3/PIK3AP1/PSMB9/LYN/TLR10/HAVCR2/TLR4/PSMB8/S100A14/UBA52/CLEC6A/BTK/PSME2/TLR2/CLEC4A/TLR1/TIFA/CLEC4E/S100A8/KLRK1/S100A9/PSMB10/HCK/FCN1/CLEC4C/CARD11/TICAM2/MUCL1/TLR6/DHX58/CLEC4D/CLEC10A/LGMN/NLRX1/CD300A/SFTPD/ITGB2/CD300LF/PGLYRP4/IRAK2/APOB/NOD2/ITGAM/PLCG2/NLRP6/GFI1/ESR1/LILRA2/ICAM3/CD209/MARCO/K…
GO:0022408	negative regulation of cell-cell adhesion	47/2341	47	BP	169/17910	2.54796e-07	6.17068e-06	PDCD1LG2/IDO1/CD274/IRF1/PTPN22/TIGIT/LILRB1/LAX1/IL2RA/JAK2/TBX21/HAVCR2/LILRB2/LAG3/XCL1/MAD1L1/CCL25/CD74/ARG1/SPN/SOCS1/ZNF703/IFNL1/NRARP/JAK3/VSIG4/CD300A/PTPN6/SFTPD/TNFSF4/AKNA/IL20RB/FOXJ1/LGALS9/FCGR2B/CXCL12/APOA1/RIPOR2/IL10/IHH/ASS1/EPCAM/WNT1/HLA-G/CTLA4/VTCN1/FGL1
GO:0045824	negative regulation of innate immune response	23/2341	23	BP	57/17910	2.56355e-07	6.19091e-06	PARP14/NMI/NLRC5/LILRB1/SAMHD1/ACOD1/NLRC3/CD96/HAVCR2/HLA-F/HLA-E/RPS19/KIR2DL4/CR1/SLAMF8/ARG1/DHX58/VSIG4/NLRX1/SERPING1/LGALS9/SERPINB9/HLA-G
GO:0042130	negative regulation of T cell proliferation	22/2341	22	BP	53/17910	2.57696e-07	6.20575e-06	PDCD1LG2/IDO1/CD274/LILRB1/IL2RA/HAVCR2/LILRB2/XCL1/MAD1L1/ARG1/SPN/VSIG4/PTPN6/SFTPD/IL20RB/FOXJ1/LGALS9/IL10/IHH/HLA-G/CTLA4/VTCN1
GO:0032635	interleukin-6 production	43/2341	43	BP	149/17910	2.66357e-07	6.39632e-06	IFIH1/PTPN22/DDX58/TLR8/NLRC3/SLAMF1/IL18RAP/TLR3/HAVCR2/LILRB2/AIF1/CD200R1/TLR4/NCKAP1L/TLR2/TLR1/BANK1/TNF/INPP5D/SIGLEC16/PAEP/IL33/TLR6/IL18/PTAFR/NLRX1/PTPN6/TYROBP/TNFSF4/NOD2/GHRL/LILRA2/EREG/FOXJ1/LGALS9/LILRA5/IL36RN/IL10/NOS2/IL1B/TSLP/LEP/INAVA
GO:0070820	tertiary granule	46/2436	46	CC	164/18675	2.46032e-07	6.62839e-06	B2M/CYBB/CTSS/ATP8B4/LILRB2/LYZ/FPR2/FLG2/CD53/NCKAP1L/PKP1/CLEC12A/DSP/TBC1D10C/CR1/LAIR1/GPR84/CDA/CLEC4C/SIGLEC5/CLEC4D/CD33/PTAFR/CD300A/PTPN6/DSG1/FCAR/ITGB2/DSC1/FPR1/SIGLEC14/ITGAM/OLR1/CSTB/ENPP4/ADAM8/PPBP/FRMPD3/KCNAB2/CLEC5A/PRSS3/CHRNB4/PTX3/HBB/MMP9/SNAP25
GO:0043230	extracellular organelle	362/2436	362	CC	2187/18675	2.78349e-07	7.28479e-06	CD274/LAP3/B2M/PTPRC/FCGR3A/FASLG/MNDA/CD86/CD38/TNFSF10/KRT17/SOD2/LY75/ERAP1/SLAMF1/SBSN/KRT10/SLPI/PSMB9/LYN/HLA-DRA/PROM2/CD48/RPL37A/WARS1/SFN/LYZ/VCAM1/CFB/DOCK2/SLAMF6/RPS2/CD53/KRT6B/NCKAP1L/MGAT4A/BSG/HLA-E/PSMB8/S100A14/UBA52/RAB25/RPS5/RPS16/TGM1/RPLP2/IGLV3-19/JCHAIN/IGHV3-23/RPS28/PSME2/EEF2/KRT1/RPS19/SLC12A3/KRT2/EPN3/HLA-DRB1/RPL28/GLRX/CYSRT1/KRT14/SULT2B1/EVPL/UBASH3A/KRT5/RAB8B…
GO:0019730	antimicrobial humoral response	34/2341	34	BP	106/17910	3.09842e-07	7.41971e-06	ACOD1/SLPI/LYZ/PI3/HLA-E/JCHAIN/RPS19/KLK5/S100A7/KRT6A/S100A8/SPINK5/S100A9/IGKV3-20/RNASE7/KLK7/DEFB1/SFTPD/PGLYRP4/RNASE6/S100A12/IGHM/LCN2/IL36RN/PRSS3/RNASE3/PRTN3/PF4/GNLY/IGHA2/CTSG/IGHA1/BPIFB1/F2
GO:0070062	extracellular exosome	358/2436	358	CC	2162/18675	3.15517e-07	7.90739e-06	CD274/LAP3/B2M/PTPRC/FCGR3A/FASLG/MNDA/CD86/CD38/TNFSF10/KRT17/SOD2/LY75/ERAP1/SLAMF1/SBSN/KRT10/SLPI/PSMB9/LYN/HLA-DRA/PROM2/CD48/RPL37A/WARS1/SFN/LYZ/VCAM1/CFB/DOCK2/SLAMF6/RPS2/CD53/KRT6B/NCKAP1L/MGAT4A/BSG/HLA-E/PSMB8/S100A14/UBA52/RAB25/RPS5/RPS16/TGM1/RPLP2/IGLV3-19/JCHAIN/IGHV3-23/RPS28/PSME2/EEF2/KRT1/RPS19/SLC12A3/KRT2/EPN3/HLA-DRB1/RPL28/GLRX/CYSRT1/KRT14/SULT2B1/EVPL/UBASH3A/KRT5/RAB8B…
GO:0030139	endocytic vesicle	69/2436	69	CC	289/18675	3.19403e-07	7.90739e-06	B2M/TAP1/CYBB/FCGR1B/TLR7/HLA-B/MSR1/HLA-DRA/FCGR1A/HLA-F/HLA-C/HLA-E/HLA-DPA1/UBA52/MPEG1/TAP2/TLR2/HLA-DRB1/TLR1/RAB8B/HLA-DQA2/HLA-DPB1/CD163/FFAR4/HLA-DQA1/RAB23/CD74/HLA-DQB1/TLR6/HLA-DRB5/HLA-H/CORO1A/SFTPD/WNT3A/NCF2/NCF4/APOB/WAS/WNT6/PLEKHG5/SFTPC/RAB39A/HBA2/RAC2/HLA-DQB2/NOS3/NCF1/AMN/APOA1/WNT7B/ADAM8/WNT3/RAB38/CD207/MARCO/WNT1/HLA-G/CTLA4/CACNG8/HBA1/GRIA4/WNT4/HBB/CACNG4/LRP2/CPNE6…
GO:0050793	regulation of developmental process	421/2341	421	BP	2598/17910	3.34386e-07	7.98511e-06	GBP1/STAT1/CXCL10/IDO1/CD274/IRF1/CXCL9/IFNG/GPR171/B2M/PTPRC/CD80/CYBB/FASLG/CYLD/SRGN/LILRB1/CD86/CD38/CDC42SE2/KRT17/SOD2/CCR2/CXCL13/RASGRP1/ERAP1/FCRL3/CD2/IL2RA/HLA-DOA/IKZF3/TLR3/JAK2/SP100/MSR1/SLC8A1/TBX21/OAS2/P2RY12/KRT10/EAF2/PSMB9/LYN/EVI2B/EFNA3/HAVCR2/WARS1/NSMF/NEUROG3/LILRB2/CD28/SFN/LAG3/CD53/IL27/TLR4/IL7/TNFSF13B/NCKAP1L/IL12RB1/EPPK1/IL7R/PSMB8/IL15/TESPA1/PDCD1/CASS4/ARHGAP1…
GO:0032623	interleukin-2 production	24/2341	24	BP	62/17910	3.55324e-07	8.46147e-06	GBP1/PTPRC/CD80/CD86/CCR2/TBX21/HAVCR2/CD28/LAG3/CD247/RPS3/XCL1/PRKCQ/CARD11/IL18/SASH3/VSIG4/CD3E/SFTPD/IL20RB/CD4/IL1B/GATA3/VTCN1
GO:1903561	extracellular vesicle	361/2436	361	CC	2185/18675	3.5191e-07	8.48287e-06	CD274/LAP3/B2M/PTPRC/FCGR3A/FASLG/MNDA/CD86/CD38/TNFSF10/KRT17/SOD2/LY75/ERAP1/SLAMF1/SBSN/KRT10/SLPI/PSMB9/LYN/HLA-DRA/PROM2/CD48/RPL37A/WARS1/SFN/LYZ/VCAM1/CFB/DOCK2/SLAMF6/RPS2/CD53/KRT6B/NCKAP1L/MGAT4A/BSG/HLA-E/PSMB8/S100A14/UBA52/RAB25/RPS5/RPS16/TGM1/RPLP2/IGLV3-19/JCHAIN/IGHV3-23/RPS28/PSME2/EEF2/KRT1/RPS19/SLC12A3/KRT2/EPN3/HLA-DRB1/RPL28/GLRX/CYSRT1/KRT14/SULT2B1/EVPL/UBASH3A/KRT5/RAB8B…
GO:0009913	epidermal cell differentiation	79/2341	79	BP	346/17910	3.57911e-07	8.4994e-06	KRT17/KRT10/SFN/PI3/CNFN/KRT6B/TGM1/KRT1/KRT2/PKP1/ABCA12/FLG/KRT14/SULT2B1/EVPL/KRT5/KRT16/KLK5/DSC3/DSP/S100A7/CERS3/CASP14/KRT6A/JAG2/MYO7A/SPINK5/KLK13/PPL/KRT6C/JUP/HRNR/PRKCH/SPRR1B/KDF1/PRSS8/SPRR1A/PKP3/DSG1/GRHL2/IVL/DSC1/ACER1/SPRR2E/CDH3/KRT80/SPRR2A/GRHL1/KLK14/EREG/KRT15/BCL11B/OVOL2/CSTA/DSC2/DNASE1L2/TGM3/SPRR2D/IRF6/KRT78/TP63/DSG3/AQP3/RIPOR2/KRT79/MSX2/POU3F1/SERPINB13/LCE2A/PER…
GO:0002221	pattern recognition receptor signaling pathway	52/2341	52	BP	197/17910	3.68263e-07	8.72099e-06	DDX60/IFIH1/IRF1/PTPN22/RSAD2/TNIP3/BIRC3/CYLD/CLEC7A/DDX58/TLR8/CTSS/TLR7/ACOD1/FCRL3/TLR3/PIK3AP1/LYN/TLR10/HAVCR2/TLR4/S100A14/UBA52/BTK/TLR2/TLR1/TIFA/CLEC4E/S100A8/S100A9/FCN1/TICAM2/TLR6/DHX58/LGMN/NLRX1/CD300A/SFTPD/ITGB2/CD300LF/PGLYRP4/IRAK2/APOB/NOD2/ITGAM/NLRP6/GFI1/ESR1/LILRA2/MARCO/INAVA/BPIFB1
GO:0032814	regulation of natural killer cell activation	15/2341	15	BP	28/17910	3.71348e-07	8.76977e-06	PTPN22/RASGRP1/HAVCR2/HLA-F/HLA-E/IL15/PRDM1/IL12B/ZNF683/TOX/IL18/TYROBP/IL23R/AXL/LEP
GO:0008528	G protein-coupled peptide receptor activity	34/2173	34	MF	105/16967	1.46105e-07	8.84542e-06	CCR5/CCR2/CCR8/CXCR6/CCR4/CCR1/CCR3/GAL/CXCR3/CMKLR1/MC1R/CCR9/XCR1/CCRL2/FPR1/SSTR3/NLRP6/CCR6/CXCR4/CX3CR1/GP1BA/QRFPR/CXCR2/CCR7/NPFFR1/NTSR2/GPR143/CXCR1/NPR1/CXCR5/CCKBR/NPBWR1/NTSR1/RAMP1
GO:0001774	microglial cell activation	21/2341	21	BP	50/17910	3.79327e-07	8.90898e-06	IFNG/PTPRC/TLR8/TLR7/TLR3/AIF1/FPR2/TLR2/STAP1/TNF/LRRK2/CST7/IL33/TLR6/C1QA/TYROBP/ITGB2/CCL3/ITGAM/TTBK1/IL13
GO:0002269	leukocyte activation involved in inflammatory response	21/2341	21	BP	50/17910	3.79327e-07	8.90898e-06	IFNG/PTPRC/TLR8/TLR7/TLR3/AIF1/FPR2/TLR2/STAP1/TNF/LRRK2/CST7/IL33/TLR6/C1QA/TYROBP/ITGB2/CCL3/ITGAM/TTBK1/IL13
GO:0032663	regulation of interleukin-2 production	22/2341	22	BP	54/17910	3.81383e-07	8.93272e-06	GBP1/PTPRC/CD80/CD86/CCR2/TBX21/HAVCR2/CD28/LAG3/RPS3/XCL1/PRKCQ/CARD11/SASH3/VSIG4/CD3E/SFTPD/IL20RB/CD4/IL1B/GATA3/VTCN1
GO:0042092	type 2 immune response	17/2341	17	BP	35/17910	3.91585e-07	9.14661e-06	IDO1/RSAD2/CD86/CCR2/TBX21/XCL1/CD74/NLRP3/ARG1/IL33/IL18/IFNL1/DENND1B/TNFSF4/NOD2/IL10/GATA3
GO:0045595	regulation of cell differentiation	306/2341	306	BP	1808/17910	4.08314e-07	9.51137e-06	GBP1/STAT1/CXCL10/IRF1/CXCL9/IFNG/GPR171/B2M/PTPRC/CD80/CYLD/LILRB1/CD86/CD38/SOD2/CCR2/RASGRP1/FCRL3/CD2/IL2RA/HLA-DOA/IKZF3/TLR3/JAK2/MSR1/TBX21/P2RY12/PSMB9/LYN/EVI2B/EFNA3/NSMF/NEUROG3/LILRB2/CD28/SFN/LAG3/CD53/IL27/TLR4/IL7/NCKAP1L/IL12RB1/IL7R/PSMB8/IL15/TESPA1/CASS4/CPEB3/BTK/PSME2/RPS19/TLR2/CD27/SEMA4D/CCR1/SULT2B1/TNFSF14/PRDM1/IL12B/IFITM1/GAL/VNN1/HCLS1/ZNF683/DUOXA1/TACSTD2/STAP1/GPR…
GO:0002830	positive regulation of type 2 immune response	11/2341	11	BP	16/17910	4.3189e-07	1.00332e-05	IDO1/RSAD2/CD86/XCL1/CD74/NLRP3/IL33/IL18/TNFSF4/NOD2/GATA3
GO:0090025	regulation of monocyte chemotaxis	14/2341	14	BP	25/17910	4.43132e-07	1.02387e-05	CXCL10/CCL5/CCR2/LYN/AIF1/FPR2/S100A14/CCR1/S100A7/SLAMF8/LGMN/CXCL12/PLA2G7/CCL1
GO:1901623	regulation of lymphocyte chemotaxis	14/2341	14	BP	25/17910	4.43132e-07	1.02387e-05	CXCL10/CCL5/CCL4/CCR2/CXCL13/TNFSF14/S100A7/XCL1/KLRK1/CCL2/CCL7/CCL3/KLRC4-KLRK1/CXCL14
GO:0001653	peptide receptor activity	34/2173	34	MF	106/16967	1.88885e-07	1.0978e-05	CCR5/CCR2/CCR8/CXCR6/CCR4/CCR1/CCR3/GAL/CXCR3/CMKLR1/MC1R/CCR9/XCR1/CCRL2/FPR1/SSTR3/NLRP6/CCR6/CXCR4/CX3CR1/GP1BA/QRFPR/CXCR2/CCR7/NPFFR1/NTSR2/GPR143/CXCR1/NPR1/CXCR5/CCKBR/NPBWR1/NTSR1/RAMP1
GO:0048002	antigen processing and presentation of peptide antigen	50/2341	50	BP	188/17910	4.7902e-07	1.10381e-05	B2M/TAP1/CYBB/CTSS/FCGR1B/MARCHF1/ERAP1/HLA-B/HLA-DOA/PSMB9/HLA-DRA/FCGR1A/HLA-F/HLA-C/LAG3/AP1M2/HLA-DMB/HLA-E/HLA-DPA1/PSMB8/TAP2/ERAP2/PSME2/CLEC4A/HLA-DRB1/HLA-DQA2/HLA-DPB1/HLA-DOB/HLA-DQA1/CD74/PSMB10/HLA-DQB1/HLA-DMA/SPTBN2/HLA-DRB5/HLA-H/LGMN/IFI30/TAPBPL/NCF2/NCF4/KIF26A/HLA-DQB2/FCGR2B/CTSE/NCF1/CD209/CD207/HLA-G/PSMA8
GO:0042592	homeostatic process	294/2341	294	BP	1730/17910	4.92725e-07	1.13096e-05	STAT1/CXCL10/CXCL11/CXCL9/B2M/PTPRC/CCL8/CYBB/FASLG/CYLD/CCR5/CD38/CYSLTR1/CCL5/SOD2/CCR2/CXCL13/GPR174/IL2RA/JAK2/SP100/SLC8A1/CLIC2/PIK3CG/LYN/IFIT1/OAS1/SFN/LYZ/XRN1/ALOX12B/FLG2/TLR4/IL7/TNFSF13B/NCKAP1L/IL7R/S100A14/PIK3R2/IL15/IKZF1/TNFRSF17/DOCK11/JCHAIN/KRT1/RPS19/POLD2/ABCA12/FLG/GLRX/CCR4/CCR1/TNFSF14/TSHR/PLCL2/SPTA1/KRT16/HCLS1/GPR183/SLC40A1/LCK/FLT3/PLAC8/FFAR4/USH1G/C3AR1/XCL1/CMKL…
GO:0031342	negative regulation of cell killing	13/2341	13	BP	22/17910	4.94771e-07	1.13096e-05	PTPRC/LILRB1/HAVCR2/HLA-F/HLA-E/IL7R/KIR2DL4/KRT6A/LGALS9/FCGR2B/SERPINB9/HLA-G/IL13
GO:0072643	interferon-gamma secretion	13/2341	13	BP	22/17910	4.94771e-07	1.13096e-05	PTPN22/BTN3A1/LILRB1/RASGRP1/CD2/BTN3A2/CD244/CD160/ISG15/LGALS9/IL36RN/GATA3/VTCN1
GO:0150076	neuroinflammatory response	27/2341	27	BP	76/17910	5.16697e-07	1.17793e-05	IFNG/PTPRC/TLR8/TLR7/TLR3/AIF1/CD200R1/FPR2/TLR2/STAP1/TNF/LRRK2/CST7/IL33/TLR6/IL18/C1QA/TNFRSF1B/TYROBP/ITGB2/CCL3/ITGAM/ADCY8/TTBK1/IL1B/MMP9/IL13
GO:0032733	positive regulation of interleukin-10 production	16/2341	16	BP	32/17910	5.21706e-07	1.18619e-05	CD274/TIGIT/CD28/TLR4/TLR2/IL12B/XCL1/SASH3/TNFSF4/NOD2/IL20RB/LGALS9/CD40LG/LILRA5/TSLP/INAVA
GO:0050731	positive regulation of peptidyl-tyrosine phosphorylation	49/2341	49	BP	184/17910	5.95507e-07	1.35039e-05	PARP14/PARP9/IFNG/PTPRC/CD80/CCL5/JAK2/LYN/FCGR1A/IL15/CASS4/SEMA4D/BANK1/IL12B/HCLS1/STAP1/FLT3/TNF/CSF1R/CD74/CRLF1/IL18/IFNL1/TNFSF18/CD3E/EPO/FGFR3/WNT3A/MIF/GHRL/CD4/PTK6/EREG/IL23R/NCF1/EPHA4/LILRA5/CD24/KIT/NEURL1/FGF7/TSLP/IL31RA/IL11/LIF/LEP/IL13/AGT/IL20
GO:1901700	response to oxygen-containing compound	267/2341	267	BP	1551/17910	5.99501e-07	1.35472e-05	STAT1/CXCL10/IDO1/GCH1/PTPN22/TNIP3/CYBB/FASLG/CCR5/CLEC7A/PTGER4/LILRB1/GRIN3A/CD38/TNFSF10/CCL5/ACOD1/SOD2/IL18RAP/JAK2/SLC8A1/P2RY12/SLPI/PIK3CG/CD96/LYN/IRF8/NUGGC/HAVCR2/CSF2RB/NSMF/LILRB2/IL10RA/AIF1/XRN1/CMPK2/FPR2/VCAM1/TLR4/BSG/S100A14/PIK3R2/GCNT1/IL15/CPEB3/PHEX/BTK/EEF2/TLR2/CD27/IL12B/TSHR/RPS3/GAL/HSD11B2/STAP1/MRC1/PTGER2/EIF4EBP1/S100A7/PTGDR/TNF/PRKCQ/DBH/ENDOG/PEMT/S100A8/LRRK2/…
GO:0050764	regulation of phagocytosis	30/2341	30	BP	90/17910	6.00582e-07	1.35472e-05	PTPRC/IL15RA/FPR2/DOCK2/NCKAP1L/IL2RB/IL15/TLR2/STAP1/C2/TNF/HCK/TULP1/IL2RG/CCL2/CD300A/SFTPD/CD300LF/C4B/FCGR2B/APOA1/C3/IL1B/PRTN3/C4A/PTX3/SPACA3/ALOX15/APOA2/MBL2
GO:0050891	multicellular organismal water homeostasis	25/2341	25	BP	68/17910	6.44293e-07	1.44745e-05	SFN/ALOX12B/FLG2/KRT1/ABCA12/FLG/KRT16/ALOXE3/SCNN1A/HRNR/CLDN4/KDF1/ACER1/GRHL3/PRKAR1B/ADCY8/GRHL1/SCNN1G/ATP6V1B1/TP63/CYP4F12/AQP3/CFTR/TFAP2B/SCNN1B
GO:0002370	natural killer cell cytokine production	7/2341	7	BP	7/17910	6.46771e-07	1.44745e-05	CD96/HLA-F/HLA-E/KIR2DL4/CD160/HLA-G/RAET1G
GO:0002727	regulation of natural killer cell cytokine production	7/2341	7	BP	7/17910	6.46771e-07	1.44745e-05	CD96/HLA-F/HLA-E/KIR2DL4/CD160/HLA-G/RAET1G
GO:2000516	positive regulation of CD4-positive, alpha-beta T cell activation	17/2341	17	BP	36/17910	6.51649e-07	1.45456e-05	IFNG/CD80/CD86/NCKAP1L/IL12RB1/IL12B/CD160/XCL1/PRKCQ/NLRP3/SOCS1/IL18/SASH3/TNFSF4/IL23R/LGALS9/CCL19
GO:0042277	peptide binding	55/2173	55	MF	215/16967	2.6325e-07	1.47116e-05	TAP1/HLA-B/MSR1/HLA-DRA/TRGV9/LILRB2/HLA-F/HLA-C/FPR2/TLR4/HLA-E/HLA-DPA1/TLR2/HLA-DRB1/TRAV19/HLA-DPB1/SLC40A1/HLA-DQA1/TRAV29DV5/CD74/HLA-DQB1/TLR6/HLA-DRB5/TRBV7-9/C1QA/TRBV12-3/TRGV3/ITGB2/MGST1/GSTP1/NOD2/TRAV8-4/PTH1R/ITGAM/SLC7A5/FCGR2B/CD209/EPHA4/APOA1/ADCYAP1R1/CRHBP/MARCO/HLA-G/GRIN1/NPR1/VIPR1/GRIA4/COL25A1/PTGES/NGFR/CCKBR/CACNA1B/PRLR/RAMP1/CMA1
GO:0043270	positive regulation of ion transport	64/2341	64	BP	266/17910	6.7401e-07	1.50055e-05	CXCL10/CXCL11/CXCL9/IFNG/CTSS/CCL5/CCL4/CCR2/P2RY12/GLRX/CCR1/ATP2C2/GAL/XCL1/STAC3/TMSB4X/KMO/P2RY6/CCL2/SCN5A/PTAFR/KCNE1/MIF/ABCB1/CCL3/FABP3/PLCG2/CD4/CHCHD10/LILRA2/GPER1/SLC34A1/EDN3/CXCL12/P2RX1/ERFE/TNFSF11/APOA1/KCNH2/LILRA5/CD19/KCNC1/ADCYAP1R1/STAC2/CFTR/SLC38A3/HAP1/GRIN1/IL1B/ATP8A2/WNK2/OXT/CACNG4/CHRNB2/GRM6/CHRM1/NOS1/LEP/IL13/AGT/NTSR1/NKX2-5/TRDN/F2
GO:0007204	positive regulation of cytosolic calcium ion concentration	62/2341	62	BP	255/17910	6.83029e-07	1.51668e-05	CXCL10/CXCL11/CXCL9/PTPRC/FASLG/CCR5/CD38/CYSLTR1/CXCL13/JAK2/SLC8A1/CLIC2/PIK3CG/LYN/CCR1/LCK/C3AR1/XCL1/JPH3/MS4A1/P2RY6/PTPN6/CORO1A/EPO/ITPR1/CCL3/CD52/PTH1R/CIB2/PLCG2/ADCY8/GHRL/CD4/ESR1/GPER1/GNG3/TPCN2/TRPV5/CHRNA9/CD19/CD24/S1PR4/EDN2/ADCYAP1R1/NMU/CCR7/PLN/HAP1/GRIN1/CNR1/CCL1/OXT/JPH4/NOS1/IL13/CCKBR/AGT/NTSR1/SAA1/CCL19/TRDN/F2
GO:0004175	endopeptidase activity	74/2173	74	MF	322/16967	2.8349e-07	1.5256e-05	CASP5/CTSS/GZMK/ADAM28/GZMA/PSMB9/GZMH/ADAMDEC1/CFB/ASPRV1/PSMB8/PHEX/CASP7/KLK10/GZMB/KLK5/CASP14/CASP10/C1S/F12/C2/KLK13/KLK8/CAPNS2/ECE2/PSMB10/KLK7/PRSS27/PRSS8/LGMN/MMP10/TMPRSS3/RHBDL1/USP2/TMPRSS4/KLK6/CARD17/KLK11/F10/C1R/KLK4/HTRA4/KLK14/TMPRSS13/F7/CTSE/ADAMTS7/ADAMTS19/TMPRSS11D/ECEL1/ADAM8/REN/PCSK9/PRSS3/TMPRSS9/PRSS22/RHBDL3/ADAM11/MASP1/KEL/PRTN3/PRSS56/ADAMTS3/UCHL1/MMP2/TLL1/MMP9…
GO:0097530	granulocyte migration	32/2341	32	BP	100/17910	7.24958e-07	1.60561e-05	PTGER4/CCL5/PIK3CG/NCKAP1L/S100A14/VAV1/S100A7/C3AR1/XCL1/CMKLR1/S100A8/SLAMF8/CD74/S100A9/JAML/CSF1/CCL7/CD300A/ITGB2/CCL3/VAV3/S100A12/RAC2/EDN3/ADAM8/CXCR2/EDN2/RIPOR2/CCR7/PRTN3/SAA1/CCL19
GO:0002831	regulation of response to biotic stimulus	40/2341	40	BP	139/17910	7.44549e-07	1.64474e-05	STAT1/CD274/DDX60/DTX3L/PARP9/CRTAM/BIRC3/LILRB1/DDX58/ACOD1/IL2RA/APOBEC3G/CD226/IFIT1/HAVCR2/IL27/IL12RB1/IL15/SIGLEC11/IL12B/KLK5/FGL2/CD160/AIM2/CGAS/SPINK5/SIGLEC16/ARG1/KLK7/DHX58/CD180/LY86/NLRX1/APOBEC3F/HERC5/MIF/LILRA2/IL23R/TSPAN32/IL1B
GO:0002369	T cell cytokine production	18/2341	18	BP	40/17910	7.49073e-07	1.65047e-05	B2M/RSAD2/CCR2/IL18RAP/TBX21/HLA-F/IL12B/XCL1/NLRP3/ARG1/IL18/SASH3/TNFRSF1B/IL18R1/DENND1B/TNFSF4/IL1B/GATA3
GO:2000401	regulation of lymphocyte migration	23/2341	23	BP	60/17910	7.61236e-07	1.67296e-05	CXCL10/CCL5/CCL4/CCR2/CXCL13/AIF1/CD200R1/DOCK8/TNFSF14/S100A7/XCL1/KLRK1/SPN/CCL2/CCL7/CCL3/GCSAM/CCR6/CXCL12/ADAM8/RIPOR2/KLRC4-KLRK1/CXCL14
GO:0050730	regulation of peptidyl-tyrosine phosphorylation	60/2341	60	BP	245/17910	7.93838e-07	1.74013e-05	PARP14/PARP9/IFNG/SAMSN1/PTPRC/CD80/CCL5/JAK2/LYN/FCGR1A/IL7/IL15/CASS4/SEMA4D/BANK1/IL12B/HCLS1/CBLC/STAP1/FLT3/TNF/CSF1R/CD74/SOCS1/CRLF1/IL18/IFNL1/TNFSF18/CD3E/CD300A/PTPN6/EPO/FGFR3/ITGB2/WNT3A/MIF/GHRL/CD4/PTK6/EREG/IL23R/NCF1/EPHA4/DMTN/LILRA5/CD24/KIT/NEURL1/FGF7/TSLP/IL31RA/GPRC5A/IL22RA2/IL11/LIF/SPINK1/LEP/IL13/AGT/IL20
GO:0002437	inflammatory response to antigenic stimulus	19/2341	19	BP	44/17910	8.09999e-07	1.77102e-05	CYSLTR1/RASGRP1/IL2RA/CD28/HLA-E/BTK/IL12B/TNF/CD6/LTA/IL20RB/NLRP6/FCGR2B/CXCR2/IL10/CCR7/C3/CNR1/GATA3
GO:0019883	antigen processing and presentation of endogenous antigen	10/2341	10	BP	14/17910	8.66401e-07	1.88951e-05	B2M/TAP1/ERAP1/HLA-F/HLA-E/TAP2/ERAP2/CD1D/CD74/HLA-G
GO:2000026	regulation of multicellular organismal development	343/2341	343	BP	2077/17910	8.7058e-07	1.89379e-05	STAT1/CXCL10/IDO1/CD274/IRF1/IFNG/GPR171/B2M/PTPRC/CD80/CYBB/FASLG/CYLD/SRGN/LILRB1/CD86/CD38/KRT17/SOD2/CCR2/CXCL13/RASGRP1/ERAP1/FCRL3/CD2/IL2RA/HLA-DOA/IKZF3/TLR3/SP100/SLC8A1/TBX21/OAS2/P2RY12/EAF2/PSMB9/LYN/EVI2B/EFNA3/HAVCR2/WARS1/NSMF/NEUROG3/LILRB2/CD28/SFN/LAG3/IL27/TLR4/IL7/NCKAP1L/IL12RB1/IL7R/PSMB8/IL15/TESPA1/PDCD1/CPEB3/BTK/PSME2/KRT1/TLR2/CD27/SEMA4D/CCR1/SULT2B1/NECTIN1/PRDM1/IL12…
GO:0031424	keratinization	56/2341	56	BP	224/17910	9.07868e-07	1.96989e-05	KRT17/KRT10/SFN/PI3/CNFN/KRT6B/TGM1/KRT1/KRT2/PKP1/ABCA12/FLG/KRT14/EVPL/KRT5/KRT16/KLK5/DSC3/DSP/CASP14/KRT6A/SPINK5/KLK13/PPL/KRT6C/JUP/HRNR/SPRR1B/PRSS8/SPRR1A/PKP3/DSG1/IVL/DSC1/SPRR2E/CDH3/KRT80/SPRR2A/KLK14/KRT15/CSTA/DSC2/TGM3/SPRR2D/KRT78/DSG3/KRT79/LCE2A/PERP/KRT19/KRT23/KRT7/TGM5/KRT81/KRTAP19-1/KRT3
GO:0048878	chemical homeostasis	185/2341	185	BP	1015/17910	9.7854e-07	2.11786e-05	STAT1/CXCL10/CXCL11/CXCL9/B2M/PTPRC/CCL8/FASLG/CCR5/CD38/CYSLTR1/CCL5/SOD2/CCR2/CXCL13/JAK2/SLC8A1/CLIC2/PIK3CG/LYN/IFIT1/OAS1/SFN/ALOX12B/FLG2/S100A14/PIK3R2/KRT1/ABCA12/FLG/CCR1/KRT16/SLC40A1/LCK/C3AR1/XCL1/CLN6/JPH3/DBH/ENDOG/S100A8/LRRK2/SLAMF8/S100A9/LRP5/MS4A1/ATP12A/ALOXE3/SCNN1A/NCS1/HRNR/P2RY6/SCN5A/CCL7/CLDN4/IL18/KDF1/PRKCB/SUCNR1/ANGPTL8/MCUB/TLCD1/TMPRSS3/PTPN6/CORO1A/EPO/SFTPD/C1QTN…
GO:0071677	positive regulation of mononuclear cell migration	13/2341	13	BP	23/17910	1.00139e-06	2.16183e-05	CXCL10/CCL5/CCR2/AIF1/FPR2/S100A14/CCR1/S100A7/TNF/LGMN/CXCL12/PLA2G7/CCL1
GO:0009888	tissue development	326/2341	326	BP	1964/17910	1.06052e-06	2.28373e-05	STAT1/CXCL10/IFNG/PTPRC/SRGN/KRT17/IKZF3/JAK2/SLC8A1/KRT10/PSMB9/NEUROG3/SFN/FLG2/PI3/CNFN/KRT6B/BSG/EPPK1/PSMB8/RAB25/TGM1/GCNT1/IKZF1/PHEX/BTK/PSME2/EEF2/KRT1/KRT2/PKP1/ABCA12/FLG/KRT14/CCR1/COL17A1/SULT2B1/NECTIN1/EVPL/PRDM1/ATP2C2/KRT5/GAL/KRT16/ESRP2/GJB5/KLK5/MYBPC3/DSC3/TACSTD2/CAMSAP3/KBTBD8/APCDD1/SLC40A1/ZNF358/DLX3/POU2F3/PITX1/DSP/S100A7/CERS3/CASP14/KRT6A/JAG2/SEMA4C/TNF/STAC3/ZNF750…
GO:0002287	alpha-beta T cell activation involved in immune response	23/2341	23	BP	61/17910	1.07163e-06	2.29608e-05	IFNG/CD80/PTGER4/CD86/TBX21/SLAMF6/IL27/IL12RB1/IL12B/GPR183/NLRP3/SPN/IL18/JAK3/IL18R1/TNFSF4/LY9/EOMES/IL23R/LGALS9/GATA3/RORC/CCL19
GO:0002293	alpha-beta T cell differentiation involved in immune response	23/2341	23	BP	61/17910	1.07163e-06	2.29608e-05	IFNG/CD80/PTGER4/CD86/TBX21/SLAMF6/IL27/IL12RB1/IL12B/GPR183/NLRP3/SPN/IL18/JAK3/IL18R1/TNFSF4/LY9/EOMES/IL23R/LGALS9/GATA3/RORC/CCL19
GO:0002828	regulation of type 2 immune response	15/2341	15	BP	30/17910	1.18877e-06	2.53437e-05	IDO1/RSAD2/CD86/CCR2/TBX21/XCL1/CD74/NLRP3/ARG1/IL33/IL18/IFNL1/TNFSF4/NOD2/GATA3
GO:0032689	negative regulation of interferon-gamma production	15/2341	15	BP	30/17910	1.18877e-06	2.53437e-05	PDCD1LG2/CD274/LILRB1/CD96/HAVCR2/TLR4/XCL1/IL33/TNFSF4/IL20RB/LGALS9/IL36RN/IL10/AXL/GATA3
GO:0032735	positive regulation of interleukin-12 production	16/2341	16	BP	34/17910	1.47698e-06	3.13318e-05	IDO1/IRF1/IFNG/TLR3/IRF8/TLR4/TLR2/IL12B/TNFSF4/IL23R/LGALS9/CD40LG/CCR7/HLA-G/LTB/CCL19
GO:2000403	positive regulation of lymphocyte migration	16/2341	16	BP	34/17910	1.47698e-06	3.13318e-05	CXCL10/CCL5/CCL4/CCR2/CXCL13/AIF1/DOCK8/TNFSF14/S100A7/XCL1/SPN/CCL7/CCL3/CXCL12/ADAM8/CXCL14
GO:0051480	regulation of cytosolic calcium ion concentration	67/2341	67	BP	289/17910	1.53852e-06	3.25565e-05	CXCL10/CXCL11/CXCL9/PTPRC/FASLG/CCR5/CD38/CYSLTR1/CXCL13/JAK2/SLC8A1/CLIC2/PIK3CG/LYN/CCR1/LCK/C3AR1/XCL1/JPH3/MS4A1/NCS1/P2RY6/PTPN6/CORO1A/EPO/ITPR1/CCL3/CD52/PTH1R/CIB2/PLCG2/ADCY8/GHRL/CD4/ESR1/GPER1/FZD9/GNG3/TPCN2/P2RX1/TRPV5/BOK/CHRNA9/CD19/CD24/S1PR4/EDN2/ADCYAP1R1/NMU/CCR7/PLN/HAP1/GRIN1/CNR1/CCL1/OXT/JPH4/CNGB1/NOS1/IL13/CCKBR/AGT/NTSR1/SAA1/CCL19/TRDN/F2
GO:0032673	regulation of interleukin-4 production	14/2341	14	BP	27/17910	1.54248e-06	3.25596e-05	CD86/HAVCR2/CD28/HLA-E/PRKCQ/NLRP3/IL33/SASH3/CD3E/TNFSF4/IL20RB/LGALS9/CD40LG/GATA3
GO:0052548	regulation of endopeptidase activity	81/2341	81	BP	370/17910	1.5498e-06	3.26337e-05	BIRC3/FASLG/TNFSF10/TNFAIP8/JAK2/SLPI/PSMB9/LYN/NAIP/EFNA3/NLRC4/SFN/PI3/PSMB8/CD27/TNFSF14/RPS3/LCK/AIM2/TNF/CR1/S100A8/SPINK5/A2ML1/CST6/NDUFA13/FAS/CST7/S100A9/NLRP3/LAMP3/NLRP7/LGMN/SPOCK2/ANXA8/TNFSF15/WNT3A/IFI6/PRR7/CARD17/MEFV/COL4A3/WFDC1/CPAMD8/CSTB/GPER1/MGMT/C4B/SERPINB3/BST2/LGALS9/P2RX1/CSTA/HMSD/EPHA4/BOK/TTBK1/XDH/TP63/WFDC2/ST18/FOXL2/SERPINB9/SERPINB13/C3/CST2/PERP/GRIN1/SPINT1/…
GO:0032612	interleukin-1 production	33/2341	33	BP	108/17910	1.57654e-06	3.31152e-05	GBP5/TLR8/JAK2/HAVCR2/NLRC4/TLR4/AIM2/NLRP3/NLRP7/TLR6/HSPB1/SUCNR1/CD33/TYROBP/GSTP1/NOD2/CCL3/CARD17/MEFV/GHRL/LILRA2/LGALS9/APOA1/CX3CR1/LILRA5/IL10/CCR7/IL1B/INAVA/SAA1/CMA1/CCL19/IGHD
GO:0030183	B cell differentiation	34/2341	34	BP	113/17910	1.62951e-06	3.41438e-05	PTPRC/CYLD/FCRL3/IKZF3/VCAM1/IL7/NCKAP1L/DOCK11/BTK/CD27/PLCL2/GPR183/FLT3/SLAMF8/MS4A1/INPP5D/CARD11/POU2F2/JAK3/PTPN6/AICDA/BLNK/PLCG2/FZD9/FCGR2B/CD40LG/NFAM1/CD19/CD79A/ITM2A/KIT/IL10/IL11/CR2
GO:0021700	developmental maturation	62/2341	62	BP	262/17910	1.81482e-06	3.79336e-05	SLFN14/IL15/BTK/SEMA4D/RAB3A/GAL/LRRK2/SPINK5/RAC3/PAEP/RHEX/POU2F2/DEFB1/REC8/SHANK1/C1QA/ANGPTL8/FERMT1/EPO/FGFR3/IRX5/PTH1R/CDH3/BHLHA15/BAIAP3/EREG/PALM/CCR6/NFATC4/DAZL/C1QL1/CX3CR1/TFCP2L1/REN/RAB38/WNT10B/IHH/MSX2/CFTR/WNT1/NEURL1/FEV/C3/PTPRN/AXL/EPHA8/GRIN1/TCP11/GATA3/MMP2/NPPC/SPINK1/CATSPERD/FOXA1/MYOC/NRXN1/BCAN/LEP/HOXB13/CCL19/TDRD5/PAX2
GO:0006812	cation transport	187/2341	187	BP	1038/17910	1.87536e-06	3.91036e-05	CXCL10/CXCL11/CXCL9/IFNG/B2M/PTPRC/CCL8/FASLG/CCR5/LILRB1/GRIN3A/CTSS/CYSLTR1/CCL5/CCL4/CCR2/FCRL3/CD84/SLC8A1/P2RY12/CLIC2/PIK3CG/LYN/LILRB2/ATP5F1D/SLC9A9/BTK/SLC12A3/GLRX/SLC38A8/CCR1/NECTIN1/MFSD3/ATP2C2/GAL/SLC40A1/LCK/SLC15A1/XCL1/JPH3/STAC3/TMSB4X/MTCO2P12/CBARP/MS4A1/SCNN1A/NCS1/ARG1/P2RY6/CCL2/SCN5A/ABCB11/CNIH2/SHANK1/NDUFA4L2/PRKCB/SLC31A2/CD33/COX4I2/MCUB/PTPN6/CORO1A/EPO/ASIC1/KCNE1/…
GO:0002861	regulation of inflammatory response to antigenic stimulus	13/2341	13	BP	24/17910	1.92281e-06	3.99954e-05	CD28/HLA-E/BTK/IL12B/TNF/LTA/IL20RB/NLRP6/FCGR2B/IL10/CCR7/C3/CNR1
GO:0019865	immunoglobulin binding	13/2173	13	MF	23/16967	7.88262e-07	4.09052e-05	FCGR3A/FCGR1B/FCGR1A/JCHAIN/MS4A1/FCAR/CD4/LILRA2/FCGR2B/FCGR3B/FCGR2C/FCER2/AMBP
GO:1903706	regulation of hemopoiesis	97/2341	97	BP	468/17910	2.01593e-06	4.18306e-05	STAT1/IRF1/IFNG/GPR171/B2M/PTPRC/CD80/CYLD/LILRB1/CD86/CCR2/RASGRP1/FCRL3/CD2/IL2RA/HLA-DOA/IKZF3/TLR3/TBX21/PSMB9/LYN/EVI2B/LILRB2/CD28/LAG3/IL27/TLR4/IL7/NCKAP1L/IL12RB1/IL7R/PSMB8/IL15/TESPA1/BTK/PSME2/CD27/CCR1/PRDM1/IL12B/VNN1/HCLS1/ZNF683/TNF/PRKCQ/C1QC/CR1/TOX/SPINK5/SLAMF8/CD74/LILRB4/INPP5D/NLRP3/LILRB3/PSMB10/CSF1/RHEX/CARD11/SOCS1/IL18/SASH3/PRKCB/IFNL1/NRARP/JAK3/PTPN6/TMEM176B/TYROBP…
GO:0002724	regulation of T cell cytokine production	15/2341	15	BP	31/17910	2.02491e-06	4.19151e-05	B2M/RSAD2/CCR2/TBX21/HLA-F/XCL1/NLRP3/ARG1/IL18/SASH3/TNFRSF1B/IL18R1/TNFSF4/IL1B/GATA3
GO:0032675	regulation of interleukin-6 production	39/2341	39	BP	139/17910	2.03995e-06	4.21244e-05	IFIH1/PTPN22/DDX58/TLR8/NLRC3/SLAMF1/TLR3/HAVCR2/LILRB2/AIF1/CD200R1/TLR4/NCKAP1L/TLR2/TLR1/BANK1/TNF/INPP5D/SIGLEC16/PAEP/IL33/TLR6/PTAFR/NLRX1/PTPN6/TYROBP/TNFSF4/NOD2/GHRL/LILRA2/EREG/FOXJ1/LGALS9/LILRA5/IL36RN/IL10/IL1B/TSLP/INAVA
GO:0035743	CD4-positive, alpha-beta T cell cytokine production	12/2341	12	BP	21/17910	2.26345e-06	4.66271e-05	RSAD2/IL18RAP/TBX21/IL12B/XCL1/NLRP3/ARG1/IL18/IL18R1/DENND1B/IL1B/GATA3
GO:0061900	glial cell activation	22/2341	22	BP	59/17910	2.27438e-06	4.66275e-05	IFNG/PTPRC/TLR8/TLR7/TLR3/AIF1/FPR2/TLR2/STAP1/TNF/LRRK2/CST7/IL33/TLR6/C1QA/TYROBP/ITGB2/CCL3/ITGAM/TTBK1/IL1B/IL13
GO:2000514	regulation of CD4-positive, alpha-beta T cell activation	22/2341	22	BP	59/17910	2.27438e-06	4.66275e-05	CD274/IFNG/CD80/CD86/TBX21/IL27/NCKAP1L/IL12RB1/IL12B/CD160/XCL1/PRKCQ/NLRP3/SOCS1/IL18/SASH3/JAK3/TNFSF4/IL23R/LGALS9/GATA3/CCL19
GO:0045121	membrane raft	70/2436	70	CC	309/18675	2.06043e-06	4.83936e-05	AKAP5/PTPRC/BIRC3/FASLG/CD8A/CD2/JAK2/P2RY12/CD226/LYN/PROM2/CD48/BSG/BTK/EEF2/TLR2/TLR1/LCK/LCP2/TNF/LAT2/LRRK2/FAS/MS4A1/INPP5D/HCK/CARD11/TLR6/SCN5A/TNFRSF1B/ITGB2/RTN4R/KCNE1/KCNA3/ARC/MAL2/ITGAM/OLR1/ADCY8/CD4/SELPLG/SLC2A1/CHRNA3/SLC34A1/MYO1A/SULF1/BST2/RTN4RL2/ZAP70/P2RX1/NOS3/SLC2A4/CD19/CD79A/CD24/ADCYAP1R1/CDH13/SKAP1/KCNMA1/SELE/CNR1/SLC6A3/PRTN3/CHRNB2/ADD2/CD1A/CDH15/NOS1/MAG/NTSR1
GO:0002701	negative regulation of production of molecular mediator of immune response	16/2341	16	BP	35/17910	2.391e-06	4.89011e-05	LILRB1/FCRL3/TBX21/CD96/HLA-F/XCL1/TNF/SPINK5/ARG1/IL33/JAK3/BST2/FCGR2B/APOA1/IL10/APOA2
GO:0001911	negative regulation of leukocyte mediated cytotoxicity	11/2341	11	BP	18/17910	2.44388e-06	4.98633e-05	PTPRC/LILRB1/HAVCR2/HLA-F/HLA-E/IL7R/KIR2DL4/LGALS9/FCGR2B/SERPINB9/HLA-G
GO:0043901	negative regulation of multi-organism process	47/2341	47	BP	182/17910	2.55305e-06	5.19666e-05	STAT1/RSAD2/CCL8/CCL5/ACOD1/CCL4/IFIT5/IL2RA/APOBEC3G/SLPI/IFIT1/IRF8/HAVCR2/OAS1/TRIM21/OASL/SIGLEC11/IL12B/IFITM1/APOBEC3D/RESF1/FGL2/POU2F3/OAS3/KRT6A/TRIM14/TNF/MX1/SPINK5/FCN1/PAEP/LTA/DHX58/ARHGDIB/NLRX1/APOBEC3A/APOBEC3F/APOBEC3H/CCL3/ISG15/LILRA2/BST2/IL10/PTX3/NPPC/CTSG/MBL2
GO:0098857	membrane microdomain	70/2436	70	CC	310/18675	2.32775e-06	5.33054e-05	AKAP5/PTPRC/BIRC3/FASLG/CD8A/CD2/JAK2/P2RY12/CD226/LYN/PROM2/CD48/BSG/BTK/EEF2/TLR2/TLR1/LCK/LCP2/TNF/LAT2/LRRK2/FAS/MS4A1/INPP5D/HCK/CARD11/TLR6/SCN5A/TNFRSF1B/ITGB2/RTN4R/KCNE1/KCNA3/ARC/MAL2/ITGAM/OLR1/ADCY8/CD4/SELPLG/SLC2A1/CHRNA3/SLC34A1/MYO1A/SULF1/BST2/RTN4RL2/ZAP70/P2RX1/NOS3/SLC2A4/CD19/CD79A/CD24/ADCYAP1R1/CDH13/SKAP1/KCNMA1/SELE/CNR1/SLC6A3/PRTN3/CHRNB2/ADD2/CD1A/CDH15/NOS1/MAG/NTSR1
GO:0050855	regulation of B cell receptor signaling pathway	14/2341	14	BP	28/17910	2.71361e-06	5.51036e-05	PTPN22/FCRL3/LYN/PLCL2/STAP1/PRKCH/PRKCB/CD300A/GCSAM/FCGR2B/NFAM1/CD19/PAX5/BLK
GO:0031348	negative regulation of defense response	57/2341	57	BP	237/17910	2.72668e-06	5.52378e-05	PARP14/PTPRC/ABCD2/NMI/NLRC5/PTGER4/LILRB1/SAMHD1/ACOD1/NLRC3/IL2RA/CD96/HAVCR2/HLA-F/CD200R1/FPR2/HLA-E/KRT1/RPS19/SIGLEC11/IL12B/KIR2DL4/FGL2/SIGLEC10/FFAR4/CR1/SPINK5/SLAMF8/CST7/NLRP3/ARG1/NLRP7/DHX58/VSIG4/NLRX1/SERPING1/TNFRSF1B/C1QTNF12/GSTP1/MEFV/IL20RB/NLRP6/WFDC1/GHRL/GPER1/LGALS9/FCGR2B/APOA1/IL10/CNR2/SERPINB9/HLA-G/GATA3/IL22RA2/CYP19A1/SAA1/F2
GO:0070821	tertiary granule membrane	25/2436	25	CC	73/18675	2.82577e-06	6.31318e-05	CYBB/ATP8B4/LILRB2/FPR2/CD53/CLEC12A/LAIR1/GPR84/CLEC4C/SIGLEC5/CLEC4D/CD33/PTAFR/CD300A/FCAR/ITGB2/SIGLEC14/ITGAM/OLR1/ADAM8/FRMPD3/KCNAB2/CLEC5A/CHRNB4/SNAP25
GO:0002294	CD4-positive, alpha-beta T cell differentiation involved in immune response	22/2341	22	BP	60/17910	3.15041e-06	6.3671e-05	IFNG/CD80/PTGER4/CD86/TBX21/SLAMF6/IL27/IL12RB1/IL12B/GPR183/NLRP3/SPN/IL18/JAK3/IL18R1/TNFSF4/LY9/IL23R/LGALS9/GATA3/RORC/CCL19
GO:0043368	positive T cell selection	15/2341	15	BP	32/17910	3.35126e-06	6.75706e-05	THEMIS/PTPRC/CYLD/TBX21/DOCK2/SLAMF6/IL12RB1/CD3D/IL12B/CD74/SPN/LY9/BCL11B/IL23R/ZAP70
GO:0033077	T cell differentiation in thymus	24/2341	24	BP	69/17910	3.366e-06	6.77081e-05	B2M/PTPRC/RASGRP1/CD28/DOCK2/IL7R/TESPA1/CD3D/VNN1/JAG2/CD74/CARD11/CD3E/FOXJ1/BCL11B/CCR6/ZAP70/FZD8/ADAM8/IHH/CCR7/WNT1/GATA3/WNT4
GO:0030057	desmosome	13/2436	13	CC	25/18675	3.44757e-06	7.51898e-05	PKP1/EVPL/DSC3/DSP/PPL/JUP/PKP3/DSG1/DSC1/POF1B/DSC2/DSG3/PERP
GO:0030104	water homeostasis	25/2341	25	BP	74/17910	3.87563e-06	7.77763e-05	SFN/ALOX12B/FLG2/KRT1/ABCA12/FLG/KRT16/ALOXE3/SCNN1A/HRNR/CLDN4/KDF1/ACER1/GRHL3/PRKAR1B/ADCY8/GRHL1/SCNN1G/ATP6V1B1/TP63/CYP4F12/AQP3/CFTR/TFAP2B/SCNN1B
GO:0002478	antigen processing and presentation of exogenous peptide antigen	45/2341	45	BP	174/17910	3.96448e-06	7.93732e-05	B2M/TAP1/CYBB/CTSS/FCGR1B/HLA-B/HLA-DOA/PSMB9/HLA-DRA/FCGR1A/HLA-F/HLA-C/LAG3/AP1M2/HLA-DMB/HLA-E/HLA-DPA1/PSMB8/TAP2/PSME2/CLEC4A/HLA-DRB1/HLA-DQA2/HLA-DPB1/HLA-DOB/HLA-DQA1/CD74/PSMB10/HLA-DQB1/HLA-DMA/SPTBN2/HLA-DRB5/HLA-H/LGMN/IFI30/NCF2/NCF4/KIF26A/HLA-DQB2/FCGR2B/CTSE/NCF1/CD207/HLA-G/PSMA8
GO:0002823	negative regulation of adaptive immune response based on somatic recombination of immune receptors built from immunoglobulin superfamily domains	17/2341	17	BP	40/17910	4.00486e-06	7.99944e-05	PTPRC/LILRB1/TBX21/HAVCR2/HLA-F/IL7R/XCL1/CR1/ARG1/IL33/JAK3/PTPN6/TNFSF4/IL20RB/FOXJ1/FCGR2B/HLA-G
GO:0032611	interleukin-1 beta production	29/2341	29	BP	93/17910	4.23483e-06	8.43906e-05	GBP5/TLR8/JAK2/NLRC4/TLR4/AIM2/NLRP3/NLRP7/TLR6/HSPB1/SUCNR1/CD33/TYROBP/GSTP1/NOD2/CCL3/CARD17/MEFV/GHRL/LILRA2/LGALS9/APOA1/CX3CR1/LILRA5/CCR7/IL1B/INAVA/CMA1/CCL19
GO:0034113	heterotypic cell-cell adhesion	22/2341	22	BP	61/17910	4.32305e-06	8.59483e-05	PTPRC/CD2/LILRB2/CD200R1/VCAM1/ITGAD/CD1D/LCK/DSP/TNF/JUP/ITGB2/ITGB7/DSC2/APOA1/CEACAM6/IL10/SKAP1/PERP/IL1B/ALOX15/BMP7
GO:0035590	purinergic nucleotide receptor signaling pathway	12/2341	12	BP	22/17910	4.38587e-06	8.67934e-05	GPR171/P2RY10/P2RY12/P2RY13/P2RY14/GPR34/P2RY8/P2RY6/PTAFR/GPR87/P2RX1/P2RY2
GO:0042094	interleukin-2 biosynthetic process	12/2341	12	BP	22/17910	4.38587e-06	8.67934e-05	PTPRC/CD80/CD86/CD28/LAG3/PRKCQ/CARD11/IL18/CD3E/SFTPD/CD4/IL1B
GO:0002765	immune response-inhibiting signal transduction	7/2341	7	BP	8/17910	4.58394e-06	9.03773e-05	LILRB1/LYN/LILRB2/CD33/IL20RB/KIR2DL1/HLA-G
GO:0071887	leukocyte apoptotic process	31/2341	31	BP	103/17910	4.58811e-06	9.03773e-05	IDO1/CD274/FASLG/CCR5/LILRB1/CD3G/CCL5/IL2RA/GIMAP8/LYN/DOCK8/IL7R/PDCD1/BTK/CD27/HCLS1/PRKCQ/CD74/JAK3/MIF/NOD2/LGALS9/CXCL12/ADAM8/CXCR2/IL10/CCR7/AXL/HCAR2/BIRC7/CCL19
GO:0071621	granulocyte chemotaxis	27/2341	27	BP	84/17910	4.74573e-06	9.32672e-05	CCL5/PIK3CG/NCKAP1L/S100A14/VAV1/S100A7/C3AR1/XCL1/CMKLR1/S100A8/CD74/S100A9/JAML/CSF1/CCL7/ITGB2/CCL3/VAV3/S100A12/RAC2/EDN3/CXCR2/EDN2/RIPOR2/CCR7/SAA1/CCL19
GO:0045086	positive regulation of interleukin-2 biosynthetic process	9/2341	9	BP	13/17910	4.77594e-06	9.36457e-05	PTPRC/CD80/CD86/CD28/PRKCQ/CARD11/CD3E/CD4/IL1B
GO:0002729	positive regulation of natural killer cell cytokine production	6/2341	6	BP	6/17910	4.95922e-06	9.67955e-05	HLA-F/HLA-E/KIR2DL4/CD160/HLA-G/RAET1G
GO:2000503	positive regulation of natural killer cell chemotaxis	6/2341	6	BP	6/17910	4.95922e-06	9.67955e-05	CCL5/CCL4/XCL1/CCL7/CCL3/CXCL14
GO:0002544	chronic inflammatory response	11/2341	11	BP	19/17910	5.11621e-06	9.87325e-05	IDO1/CCL5/CXCL13/VCAM1/VNN1/TNF/S100A8/LTA/IL10/PTGES/CYP19A1
GO:0002577	regulation of antigen processing and presentation	11/2341	11	BP	19/17910	5.11621e-06	9.87325e-05	HLA-DOA/LILRB2/FGL2/HLA-DOB/CD74/TAPBPL/NOD2/WAS/FCGR2B/CCR7/CCL19
GO:0002922	positive regulation of humoral immune response	11/2341	11	BP	19/17910	5.11621e-06	9.87325e-05	PTPRC/ACOD1/KLK5/TNF/KLK7/LTA/FCGR2B/FCER2/CCR7/C3/IL1B
GO:0045061	thymic T cell selection	11/2341	11	BP	19/17910	5.11621e-06	9.87325e-05	PTPRC/CD28/DOCK2/CD3D/JAG2/CD74/CARD11/CD3E/ZAP70/CCR7/GATA3
GO:0045076	regulation of interleukin-2 biosynthetic process	11/2341	11	BP	19/17910	5.11621e-06	9.87325e-05	PTPRC/CD80/CD86/CD28/LAG3/PRKCQ/CARD11/CD3E/SFTPD/CD4/IL1B
GO:0043030	regulation of macrophage activation	23/2341	23	BP	66/17910	5.16393e-06	9.94289e-05	PTPRC/HAVCR2/TLR4/STAP1/TNF/LRRK2/CD74/CST7/IL33/TLR6/C1QA/VSIG4/ITGB2/MIF/CCL3/ITGAM/FCGR2B/TTBK1/IL10/SLC7A2/IL31RA/SPACA3/IL13
GO:0030001	metal ion transport	148/2341	148	BP	800/17910	5.38274e-06	0.000103402	CXCL10/CXCL11/CXCL9/B2M/PTPRC/CCL8/FASLG/CCR5/LILRB1/GRIN3A/CYSLTR1/CCL5/CCL4/FCRL3/CD84/SLC8A1/P2RY12/CLIC2/PIK3CG/LYN/LILRB2/SLC12A3/GLRX/SLC38A8/CCR1/NECTIN1/ATP2C2/GAL/SLC40A1/LCK/XCL1/JPH3/STAC3/CBARP/MS4A1/SCNN1A/NCS1/P2RY6/CCL2/SCN5A/ABCB11/PRKCB/SLC31A2/CD33/MCUB/PTPN6/CORO1A/EPO/ASIC1/KCNE1/ITPR1/CACNA1H/KCNA3/WNT3A/CRHR1/KCNQ2/KCNK7/KCNU1/CCL3/KCNIP3/PLCG2/PKD1L3/BHLHA15/CD4/SLC39A2/LIL…
GO:0032604	granulocyte macrophage colony-stimulating factor production	10/2341	10	BP	16/17910	5.39445e-06	0.000103402	CD80/DDX58/RASGRP1/CD84/IL12B/PAEP/IL18/LILRA2/IL23R/IL1B
GO:0010817	regulation of hormone levels	101/2341	101	BP	503/17910	5.40714e-06	0.000103413	IFNG/CD38/CCL5/JAK2/LYN/BTK/DDO/HSD11B1/RAB8B/GAL/DUOXA1/HSD11B2/FDX2/TNF/CPLX1/RDH10/CRYM/ECE2/PPARD/CRABP1/DUOX1/CRABP2/SDR16C5/AKR1B10/SLCO4A1/LHB/HSD17B1/C1QTNF12/VSNL1/LTBP4/KLK6/ITPR1/DKKL1/CACNA1H/CRHR1/HSD17B2/CYP1B1/ADCY8/GFI1/GHRL/MAFA/ESR1/BAIAP3/AKR1B15/GPER1/SLC2A1/TFR2/CHRNA3/EDN3/RASL10B/BRSK2/CYP11A1/TNFSF11/CACNA2D2/SOX11/APOA1/HSD17B14/REN/AKR1C2/CRHBP/FAM3B/HNF4A/FOXL2/CFTR/NMU…
GO:0019884	antigen processing and presentation of exogenous antigen	45/2341	45	BP	176/17910	5.49165e-06	0.000104795	B2M/TAP1/CYBB/CTSS/FCGR1B/HLA-B/HLA-DOA/PSMB9/HLA-DRA/FCGR1A/HLA-F/HLA-C/LAG3/AP1M2/HLA-DMB/HLA-E/HLA-DPA1/PSMB8/TAP2/PSME2/CLEC4A/HLA-DRB1/HLA-DQA2/HLA-DPB1/HLA-DOB/HLA-DQA1/CD74/PSMB10/HLA-DQB1/HLA-DMA/SPTBN2/HLA-DRB5/HLA-H/LGMN/IFI30/NCF2/NCF4/KIF26A/HLA-DQB2/FCGR2B/CTSE/NCF1/CD207/HLA-G/PSMA8
GO:0072507	divalent inorganic cation homeostasis	86/2341	86	BP	412/17910	5.65385e-06	0.00010765	CXCL10/CXCL11/CXCL9/PTPRC/CCL8/FASLG/CCR5/CD38/CYSLTR1/CCL5/CCR2/CXCL13/JAK2/SLC8A1/CLIC2/PIK3CG/LYN/S100A14/CCR1/LCK/C3AR1/XCL1/JPH3/S100A8/S100A9/MS4A1/NCS1/P2RY6/CCL7/PRKCB/MCUB/PTPN6/CORO1A/EPO/ITPR1/CCL3/CD52/PTH1R/CIB2/PLCG2/ADCY8/GHRL/CD4/ESR1/GPER1/TMC8/FZD9/GNG3/TPCN2/EDN3/CXCL12/P2RX1/TNFSF11/ATP6V1B1/TRPV5/BOK/CHRNA9/CD19/CD24/S1PR4/EDN2/ADCYAP1R1/SLC30A3/SLC30A2/NMU/CCR7/PLN/SLC8A2/HA…
GO:0007162	negative regulation of cell adhesion	62/2341	62	BP	271/17910	5.86274e-06	0.000111379	GBP1/PDCD1LG2/IDO1/CD274/IRF1/PTPN22/PTPRC/TIGIT/LILRB1/LAX1/IL2RA/JAK2/TBX21/HAVCR2/ADAMDEC1/LILRB2/LAG3/SEMA4D/ARHGDIG/TACSTD2/XCL1/MAD1L1/CCL25/CD74/AJAP1/ARG1/SPN/SOCS1/ZNF703/ARHGDIB/IFNL1/NRARP/JAK3/VSIG4/CD300A/PTPN6/SFTPD/TNFSF4/AKNA/PTPRO/CYP1B1/IL20RB/FOXJ1/LGALS9/FCGR2B/CXCL12/DMTN/APOA1/SEMA6A/RIPOR2/CDH13/IL10/IHH/ASS1/EPCAM/WNT1/HLA-G/CTLA4/VTCN1/MYOC/DAB1/FGL1
GO:0071675	regulation of mononuclear cell migration	18/2341	18	BP	45/17910	5.92119e-06	0.00011224	CXCL10/CCL5/CCR2/LYN/AIF1/FPR2/S100A14/CCR1/S100A7/C3AR1/CMKLR1/TNF/SLAMF8/CSF1/LGMN/CXCL12/PLA2G7/CCL1
GO:0002230	positive regulation of defense response to virus by host	13/2341	13	BP	26/17910	6.2072e-06	0.000117401	STAT1/DTX3L/PARP9/LILRB1/DDX58/APOBEC3G/IL27/IL12RB1/IL12B/AIM2/CGAS/APOBEC3F/IL23R
GO:0031012	extracellular matrix	95/2436	95	CC	468/18675	5.95189e-06	0.000126789	CTSS/SLPI/ADAMDEC1/PI3/IL7/KRT1/FLG/COL17A1/EMILIN3/FGL2/S100A7/F12/C1QC/EGFL7/S100A8/S100A9/BCAM/HRNR/FCN1/C1QB/FBN3/C1QA/SERPING1/MMP10/SPOCK2/ENTPD2/COL26A1/WNT11/ANXA8/LTBP4/FGF1/MMP17/COL4A3/MFAP2/WNT6/COL4A6/CSTB/LAD1/CCBE1/ADAMTSL5/SULF1/ABI3BP/LAMC3/LGALS9/ACAN/F7/CXCL12/SERPINA1/COL4A4/FGFR2/DGCR6/MMRN1/GPC2/APOA1/WNT3/FBN2/CBLN1/F13A1/GPC3/COL6A5/CDH13/IHH/RTBDN/SERPINB9/ADAM11/COL9A3/P…
GO:0050801	ion homeostasis	127/2341	127	BP	669/17910	6.96966e-06	0.000131531	CXCL10/CXCL11/CXCL9/B2M/PTPRC/CCL8/FASLG/CCR5/CD38/CYSLTR1/CCL5/CCR2/CXCL13/JAK2/SLC8A1/CLIC2/PIK3CG/LYN/S100A14/CCR1/SLC40A1/LCK/C3AR1/XCL1/CLN6/JPH3/S100A8/LRRK2/SLAMF8/S100A9/MS4A1/ATP12A/SCNN1A/NCS1/P2RY6/SCN5A/CCL7/PRKCB/MCUB/TLCD1/TMPRSS3/PTPN6/CORO1A/EPO/ITPR1/IFI6/CCL3/CD52/RHCG/PTH1R/FABP3/CIB2/PLCG2/ADCY8/GHRL/CD4/ESR1/GPER1/RAB39A/TFR2/SLC4A11/TMC8/FZD9/CACNA1G/GNG3/TPCN2/SCNN1G/SLC34A…
GO:0098771	inorganic ion homeostasis	116/2341	116	BP	600/17910	7.30004e-06	0.000137463	CXCL10/CXCL11/CXCL9/B2M/PTPRC/CCL8/FASLG/CCR5/CD38/CYSLTR1/CCL5/CCR2/CXCL13/JAK2/SLC8A1/CLIC2/PIK3CG/LYN/S100A14/CCR1/SLC40A1/LCK/C3AR1/XCL1/CLN6/JPH3/S100A8/LRRK2/SLAMF8/S100A9/MS4A1/ATP12A/SCNN1A/NCS1/P2RY6/CCL7/PRKCB/MCUB/TMPRSS3/PTPN6/CORO1A/EPO/ITPR1/CCL3/CD52/RHCG/PTH1R/CIB2/PLCG2/ADCY8/GHRL/CD4/ESR1/GPER1/RAB39A/TFR2/TMC8/FZD9/GNG3/TPCN2/SCNN1G/SLC34A1/EDN3/CXCL12/P2RX1/ERFE/TNFSF11/ATP6V1…
GO:0043372	positive regulation of CD4-positive, alpha-beta T cell differentiation	14/2341	14	BP	30/17910	7.61338e-06	0.000143048	IFNG/CD80/CD86/NCKAP1L/IL12RB1/IL12B/NLRP3/SOCS1/IL18/SASH3/TNFSF4/IL23R/LGALS9/CCL19
GO:1990266	neutrophil migration	24/2341	24	BP	72/17910	7.82933e-06	0.000146783	PIK3CG/NCKAP1L/VAV1/C3AR1/XCL1/S100A8/SLAMF8/CD74/S100A9/JAML/ITGB2/CCL3/VAV3/S100A12/RAC2/EDN3/ADAM8/CXCR2/EDN2/RIPOR2/CCR7/PRTN3/SAA1/CCL19
GO:0046637	regulation of alpha-beta T cell differentiation	22/2341	22	BP	63/17910	7.92617e-06	0.000148273	IFNG/CD80/CD86/TBX21/IL27/NCKAP1L/IL12RB1/PRDM1/IL12B/ZNF683/NLRP3/SOCS1/IL18/SASH3/JAK3/TNFSF4/IL23R/LGALS9/ZAP70/IHH/GATA3/CCL19
GO:0051897	positive regulation of protein kinase B signaling	44/2341	44	BP	173/17910	8.03766e-06	0.00015003	TRAT1/ICOS/CD80/CD86/P2RY12/PIK3CG/PIK3AP1/CD28/PIK3R2/HCLS1/VAV1/LCK/MC1R/TNF/IL18/C1QTNF12/FGFR3/FGF1/CCL3/IL26/F10/FAM110C/ESR1/EREG/RAC2/FGF5/PIK3R5/F7/FGFR2/TNFSF11/CX3CR1/ADAM8/CD19/FGFR4/AKR1C2/MEIS3/KIT/CCR7/FGF7/GATA3/CHI3L1/MYOC/LEP/CCL19
GO:0035588	G protein-coupled purinergic receptor signaling pathway	12/2341	12	BP	23/17910	8.07802e-06	0.000150128	GPR171/P2RY10/P2RY12/P2RY13/P2RY14/GPR34/NECAB2/P2RY8/P2RY6/PTAFR/GPR87/P2RY2
GO:0050857	positive regulation of antigen receptor-mediated signaling pathway	12/2341	12	BP	23/17910	8.07802e-06	0.000150128	TRAT1/PTPRC/CYLD/CD226/TESPA1/RPS3/STAP1/LCK/PRKCH/PRKCB/NFAM1/CCR7
GO:0015026	coreceptor activity	17/2173	17	MF	40/16967	3.0116e-06	0.000150891	CD80/CCR5/CD86/CD8A/CCR8/CXCR6/CD28/CD8B/NECTIN1/FCRL1/LRP5/GPR15/PTK7/CD4/CXCR4/NGFR/HJV
GO:0052547	regulation of peptidase activity	83/2341	83	BP	398/17910	8.48988e-06	0.000157314	BIRC3/FASLG/TNFSF10/TNFAIP8/JAK2/SLPI/PSMB9/LYN/NAIP/EFNA3/NLRC4/SFN/PI3/PSMB8/CD27/TNFSF14/RPS3/LCK/AIM2/TNF/CR1/S100A8/SPINK5/A2ML1/CST6/NDUFA13/FAS/CST7/S100A9/NLRP3/LAMP3/NLRP7/LGMN/SPOCK2/ANXA8/TNFSF15/WNT3A/IFI6/PRR7/CARD17/MEFV/COL4A3/WFDC1/CPAMD8/CSTB/GPER1/MGMT/C4B/SERPINB3/BST2/MAPK12/LGALS9/P2RX1/CSTA/HMSD/EPHA4/BOK/TTBK1/XDH/TP63/WFDC2/ST18/GPC3/FOXL2/SERPINB9/SERPINB13/C3/CST2/PERP/G…
GO:0045730	respiratory burst	15/2341	15	BP	34/17910	8.50149e-06	0.000157314	CYBB/PIK3CG/JCHAIN/RPS19/SLAMF8/HCK/NOXA1/NCF2/NCF4/CD52/RAC2/NCF1/CD24/IGHA2/IGHA1
GO:2000107	negative regulation of leukocyte apoptotic process	18/2341	18	BP	46/17910	8.54447e-06	0.000157768	IDO1/CCR5/LILRB1/CCL5/DOCK8/IL7R/CD27/HCLS1/PRKCQ/CD74/JAK3/MIF/NOD2/CXCL12/CXCR2/CCR7/AXL/CCL19
GO:0033218	amide binding	61/2173	61	MF	266/16967	3.297e-06	0.000159685	TAP1/HLA-B/MSR1/HLA-DRA/TRGV9/LILRB2/HLA-F/HLA-C/FPR2/TLR4/HLA-E/HLA-DPA1/TLR2/HLA-DRB1/TRAV19/HLA-DPB1/SLC40A1/HLA-DQA1/TRAV29DV5/CD74/HLA-DQB1/TLR6/HLA-DRB5/TRBV7-9/C1QA/TRBV12-3/TRGV3/ITGB2/CD300LF/RTN4R/MGST1/GSTP1/NOD2/TRAV8-4/PTH1R/ITGAM/FTCD/SLC7A5/FCGR2B/CD209/EPHA4/APOA1/ADCYAP1R1/CRHBP/MARCO/HLA-G/GRIN1/NPR1/VIPR1/ACADL/GRIA4/COL25A1/PTGES/NGFR/CCKBR/CACNA1B/MAG/PRLR/RAMP1/CMA1/FOLR1
GO:0002711	positive regulation of T cell mediated immunity	16/2341	16	BP	38/17910	8.89357e-06	0.00016386	B2M/PTPRC/RSAD2/HLA-F/IL12RB1/HLA-E/IL12B/XCL1/NLRP3/IL18/SASH3/IL18R1/TNFSF4/IL23R/IL1B/GATA3
GO:0098589	membrane region	70/2436	70	CC	321/18675	8.38838e-06	0.000174631	AKAP5/PTPRC/BIRC3/FASLG/CD8A/CD2/JAK2/P2RY12/CD226/LYN/PROM2/CD48/BSG/BTK/EEF2/TLR2/TLR1/LCK/LCP2/TNF/LAT2/LRRK2/FAS/MS4A1/INPP5D/HCK/CARD11/TLR6/SCN5A/TNFRSF1B/ITGB2/RTN4R/KCNE1/KCNA3/ARC/MAL2/ITGAM/OLR1/ADCY8/CD4/SELPLG/SLC2A1/CHRNA3/SLC34A1/MYO1A/SULF1/BST2/RTN4RL2/ZAP70/P2RX1/NOS3/SLC2A4/CD19/CD79A/CD24/ADCYAP1R1/CDH13/SKAP1/KCNMA1/SELE/CNR1/SLC6A3/PRTN3/CHRNB2/ADD2/CD1A/CDH15/NOS1/MAG/NTSR1
GO:0002483	antigen processing and presentation of endogenous peptide antigen	8/2341	8	BP	11/17910	9.6222e-06	0.000176146	B2M/TAP1/ERAP1/HLA-F/HLA-E/TAP2/ERAP2/HLA-G
GO:0002923	regulation of humoral immune response mediated by circulating immunoglobulin	8/2341	8	BP	11/17910	9.6222e-06	0.000176146	PTPRC/TNF/CR1/LTA/PTPN6/FOXJ1/FCGR2B/FCER2
GO:0043383	negative T cell selection	8/2341	8	BP	11/17910	9.6222e-06	0.000176146	THEMIS/PTPRC/CD28/DOCK2/CD74/CD3E/ZAP70/CCR7
GO:0031663	lipopolysaccharide-mediated signaling pathway	20/2341	20	BP	55/17910	1.01267e-05	0.000184985	PTPN22/CCL5/ACOD1/LYN/TLR4/TLR2/TNF/HCK/CD6/CCL2/IL18/CD180/LY86/PTAFR/IRAK2/MIF/CCL3/LILRA2/NOS3/IL1B
GO:0050688	regulation of defense response to virus	24/2341	24	BP	73/17910	1.02305e-05	0.000186483	STAT1/DDX60/DTX3L/PARP9/BIRC3/LILRB1/DDX58/IL2RA/APOBEC3G/IFIT1/IL27/IL12RB1/IL15/IL12B/FGL2/AIM2/CGAS/DHX58/NLRX1/APOBEC3F/HERC5/IL23R/TSPAN32/IL1B
GO:0023029	MHC class Ib protein binding	7/2173	7	MF	8/16967	3.9824e-06	0.000186659	KLRD1/TAP1/LILRB1/LILRB2/TAP2/KIR3DL2/KIR2DS4
GO:0018108	peptidyl-tyrosine phosphorylation	74/2341	74	BP	346/17910	1.0326e-05	0.000187823	PARP14/PARP9/IFNG/SAMSN1/PTPRC/CD80/CCL5/JAK2/LYN/FCGR1A/IL7/IL15/CASS4/BTK/SEMA4D/BANK1/IL12B/HCLS1/CBLC/STAP1/LCK/FLT3/TNF/CSF1R/CD74/HCK/SOCS1/CRLF1/IL18/IFNL1/JAK3/TNFSF18/CD3E/CD300A/PTPN6/EPO/FGFR3/ITGB2/WNT3A/MIF/GHRL/CD4/PTK6/EREG/IL23R/EPHB6/ZAP70/STYK1/FGFR2/NCF1/EPHA4/DMTN/LILRA5/TTBK1/FGFR4/CD24/KIT/NEURL1/AXL/EPHA8/FGF7/TSLP/IL31RA/GPRC5A/IL22RA2/IL11/LIF/SPINK1/BLK/LEP/IL13/AGT/PRLR…
GO:0055074	calcium ion homeostasis	81/2341	81	BP	388/17910	1.04184e-05	0.000189101	CXCL10/CXCL11/CXCL9/PTPRC/CCL8/FASLG/CCR5/CD38/CYSLTR1/CCL5/CCR2/CXCL13/JAK2/SLC8A1/CLIC2/PIK3CG/LYN/S100A14/CCR1/LCK/C3AR1/XCL1/JPH3/MS4A1/NCS1/P2RY6/CCL7/PRKCB/MCUB/PTPN6/CORO1A/EPO/ITPR1/CCL3/CD52/PTH1R/CIB2/PLCG2/ADCY8/GHRL/CD4/ESR1/GPER1/FZD9/GNG3/TPCN2/EDN3/CXCL12/P2RX1/TNFSF11/ATP6V1B1/TRPV5/BOK/CHRNA9/CD19/CD24/S1PR4/EDN2/ADCYAP1R1/NMU/CCR7/PLN/SLC8A2/HAP1/GRIN1/CNR1/KEL/CCL1/TFAP2B/OXT/J…
GO:0030054	cell junction	214/2436	214	CC	1247/18675	9.6153e-06	0.000195725	THEMIS/LAP3/B2M/PTPRC/FYB1/DDX58/GRIN3A/ITK/CD2/JAK2/SLC8A1/CD96/LYN/BIN2/RPL37A/HAVCR2/NSMF/RPL18/RPS2/CD53/BSG/EPPK1/TRIM29/S100A14/RPS5/XIRP1/RPS16/RPL8/RPLP2/CASS4/CPEB3/CLCA2/RPS19/RPS15/PKP1/COL17A1/NECTIN1/EVPL/TENM2/RPS3/RPL12/GJB5/LCP1/DSC3/CAMSAP3/IGSF9/APBB1IP/VAV1/LCP2/DSP/S100A7/MISP/NEXN/SEMA4C/TMEM240/NECTIN4/LRRK2/CBARP/PPL/RAB23/TNS4/S100A9/JAML/FHL3/PAK4/AJAP1/JUP/NCS1/HCK/TULP1…
GO:0055065	metal ion homeostasis	104/2341	104	BP	531/17910	1.21595e-05	0.000219545	CXCL10/CXCL11/CXCL9/B2M/PTPRC/CCL8/FASLG/CCR5/CD38/CYSLTR1/CCL5/CCR2/CXCL13/JAK2/SLC8A1/CLIC2/PIK3CG/LYN/S100A14/CCR1/SLC40A1/LCK/C3AR1/XCL1/JPH3/S100A8/S100A9/MS4A1/SCNN1A/NCS1/P2RY6/CCL7/PRKCB/MCUB/TMPRSS3/PTPN6/CORO1A/EPO/ITPR1/CCL3/CD52/PTH1R/CIB2/PLCG2/ADCY8/GHRL/CD4/ESR1/GPER1/TFR2/TMC8/FZD9/GNG3/TPCN2/SCNN1G/EDN3/CXCL12/P2RX1/ERFE/TNFSF11/ATP6V1B1/CP/TRPV5/BOK/CHRNA9/KCNH2/CD19/LCN2/CD24/S…
GO:0043370	regulation of CD4-positive, alpha-beta T cell differentiation	18/2341	18	BP	47/17910	1.21644e-05	0.000219545	IFNG/CD80/CD86/TBX21/IL27/NCKAP1L/IL12RB1/IL12B/NLRP3/SOCS1/IL18/SASH3/JAK3/TNFSF4/IL23R/LGALS9/GATA3/CCL19
GO:0030593	neutrophil chemotaxis	21/2341	21	BP	60/17910	1.21727e-05	0.000219545	PIK3CG/NCKAP1L/VAV1/C3AR1/XCL1/S100A8/CD74/S100A9/JAML/ITGB2/CCL3/VAV3/S100A12/RAC2/EDN3/CXCR2/EDN2/RIPOR2/CCR7/SAA1/CCL19
GO:0055080	cation homeostasis	113/2341	113	BP	588/17910	1.26401e-05	0.000227496	CXCL10/CXCL11/CXCL9/B2M/PTPRC/CCL8/FASLG/CCR5/CD38/CYSLTR1/CCL5/CCR2/CXCL13/JAK2/SLC8A1/CLIC2/PIK3CG/LYN/S100A14/CCR1/SLC40A1/LCK/C3AR1/XCL1/CLN6/JPH3/S100A8/LRRK2/SLAMF8/S100A9/MS4A1/ATP12A/SCNN1A/NCS1/P2RY6/CCL7/PRKCB/MCUB/TMPRSS3/PTPN6/CORO1A/EPO/ITPR1/CCL3/CD52/RHCG/PTH1R/CIB2/PLCG2/ADCY8/GHRL/CD4/ESR1/GPER1/RAB39A/TFR2/SLC4A11/TMC8/FZD9/GNG3/TPCN2/SCNN1G/EDN3/CXCL12/P2RX1/ERFE/TNFSF11/ATP6V1…
GO:0043616	keratinocyte proliferation	17/2341	17	BP	43/17910	1.28959e-05	0.000231611	SFN/EPPK1/TGM1/KRT2/KLK8/PPARD/SDR16C5/KDF1/FERMT1/CDH3/EREG/BCL11B/OVOL2/IRF6/TP63/CDH13/FGF7
GO:0002377	immunoglobulin production	29/2341	29	BP	98/17910	1.32293e-05	0.000237101	PTPRC/SAMHD1/LAX1/FCRL3/TBX21/CD28/TNFSF13B/HLA-E/IL7R/BTK/FGL2/XCL1/GPI/TNF/CGAS/MZB1/HLA-DQB1/CARD11/POU2F2/IL33/TNFSF4/AICDA/CCR6/FCGR2B/CD40LG/ITM2A/IL10/RBP4/IL13
GO:0006816	calcium ion transport	85/2341	85	BP	415/17910	1.36188e-05	0.000243572	CXCL10/CXCL11/CXCL9/PTPRC/CCL8/FASLG/CCR5/LILRB1/GRIN3A/CYSLTR1/CCL5/CCL4/FCRL3/CD84/SLC8A1/P2RY12/CLIC2/PIK3CG/LYN/LILRB2/CCR1/ATP2C2/LCK/XCL1/JPH3/STAC3/CBARP/MS4A1/NCS1/P2RY6/CCL2/PRKCB/CD33/MCUB/PTPN6/CORO1A/EPO/ASIC1/ITPR1/CACNA1H/WNT3A/CRHR1/CCL3/PLCG2/PKD1L3/BHLHA15/CD4/LILRA2/GPER1/CACNA1G/TPCN2/CXCL12/P2RX1/NOS3/CXCR4/CACNA2D2/TRPV5/CHRNA9/LILRA5/CD19/ADCYAP1R1/STAC2/CCR7/PLN/SLC8A2/HAP1…
GO:0018212	peptidyl-tyrosine modification	74/2341	74	BP	349/17910	1.41469e-05	0.000252488	PARP14/PARP9/IFNG/SAMSN1/PTPRC/CD80/CCL5/JAK2/LYN/FCGR1A/IL7/IL15/CASS4/BTK/SEMA4D/BANK1/IL12B/HCLS1/CBLC/STAP1/LCK/FLT3/TNF/CSF1R/CD74/HCK/SOCS1/CRLF1/IL18/IFNL1/JAK3/TNFSF18/CD3E/CD300A/PTPN6/EPO/FGFR3/ITGB2/WNT3A/MIF/GHRL/CD4/PTK6/EREG/IL23R/EPHB6/ZAP70/STYK1/FGFR2/NCF1/EPHA4/DMTN/LILRA5/TTBK1/FGFR4/CD24/KIT/NEURL1/AXL/EPHA8/FGF7/TSLP/IL31RA/GPRC5A/IL22RA2/IL11/LIF/SPINK1/BLK/LEP/IL13/AGT/PRLR…
GO:0001914	regulation of T cell mediated cytotoxicity	12/2341	12	BP	24/17910	1.42332e-05	0.0002535	B2M/PTPRC/LILRB1/HLA-F/IL12RB1/HLA-E/IL7R/IL12B/XCL1/IL23R/FCGR2B/HLA-G
GO:0005164	tumor necrosis factor receptor binding	14/2173	14	MF	30/16967	5.96988e-06	0.000262856	STAT1/FASLG/TNFSF10/TNFSF8/TNFSF13B/TNFSF14/TNF/LTA/TNFSF4/TNFSF15/CD40LG/TNFSF11/CD70/LTB
GO:0008009	chemokine activity	14/2173	14	MF	30/16967	5.96988e-06	0.000262856	CXCL10/CXCL11/CXCL9/CCL5/CXCL13/XCL1/CCL25/CCL7/CCL3/CXCL12/CCL1/PF4/CXCL14/CCL19
GO:0072503	cellular divalent inorganic cation homeostasis	81/2341	81	BP	392/17910	1.54334e-05	0.000274305	CXCL10/CXCL11/CXCL9/PTPRC/CCL8/FASLG/CCR5/CD38/CYSLTR1/CCL5/CCR2/CXCL13/JAK2/SLC8A1/CLIC2/PIK3CG/LYN/CCR1/LCK/C3AR1/XCL1/JPH3/S100A8/S100A9/MS4A1/NCS1/P2RY6/CCL7/PRKCB/MCUB/PTPN6/CORO1A/EPO/ITPR1/CCL3/CD52/PTH1R/CIB2/PLCG2/ADCY8/GHRL/CD4/ESR1/GPER1/FZD9/GNG3/TPCN2/EDN3/CXCL12/P2RX1/TRPV5/BOK/CHRNA9/CD19/CD24/S1PR4/EDN2/ADCYAP1R1/SLC30A3/SLC30A2/NMU/CCR7/PLN/SLC8A2/HAP1/GRIN1/CNR1/KEL/CCL1/OXT/JPH…
GO:0019956	chemokine binding	12/2173	12	MF	23/16967	6.50823e-06	0.000278131	CCR5/CCR2/CXCR6/CCR1/CCR3/CXCR3/CCR6/CXCR4/CX3CR1/CXCR2/CCR7/CXCR1
GO:0098796	membrane protein complex	168/2436	168	CC	947/18675	1.42841e-05	0.000284441	TRAT1/B2M/TAP1/CYBB/GRIN3A/CD3G/CD8A/HLA-B/IL2RA/HLA-DOA/IL18RAP/CLIC2/PIK3CG/LYN/HLA-DRA/CSF2RB/HLA-F/HLA-C/CD8B/VCAM1/AP1M2/TLR4/HLA-DMB/IL12RB1/HLA-E/IL2RB/HLA-DPA1/TAP2/ATP5F1D/TLR2/HLA-DRB1/TLR1/CD3D/ITGAD/HLA-DQA2/CD247/GJB5/TTYH3/APBB1IP/HLA-DPB1/HLA-DOB/HLA-DQA1/CASP10/GNGT2/STAC3/CLIC5/CPLX1/MTCO2P12/ITGAL/NDUFB7/GPAA1/NDUFA13/CD74/FAS/LRP5/ATP12A/SCNN1A/JUP/NDUFS7/NDUFS8/HLA-DQB1/HLA-DM…
GO:0048525	negative regulation of viral process	29/2341	29	BP	99/17910	1.63989e-05	0.000290859	STAT1/RSAD2/CCL8/CCL5/CCL4/IFIT5/APOBEC3G/SLPI/IFIT1/OAS1/TRIM21/OASL/IFITM1/APOBEC3D/RESF1/POU2F3/OAS3/TRIM14/TNF/MX1/FCN1/APOBEC3A/APOBEC3F/APOBEC3H/CCL3/ISG15/BST2/PTX3/MBL2
GO:0031225	anchored component of membrane	40/2436	40	CC	156/18675	1.58471e-05	0.00030885	CD2/VNN2/CD48/EFNA3/LYPD3/VNN1/LY6G6C/CD160/LY6D/EFNA4/LYPD6B/CA4/RTN4R/CD52/MMP17/BST2/RTN4RL2/FCGR3B/GPC2/CEACAM6/EFNA2/GP1BA/ART4/LYNX1/GPC3/CDH13/RHBG/RAET1G/CNTN6/OTOA/ENPP6/RGS7BP/RAB3C/CEACAM5/NTNG1/BCAN/CNTFR/GPC5/HJV/FOLR1
GO:0031406	carboxylic acid binding	44/2173	44	MF	176/16967	7.58586e-06	0.000311315	GRIN3A/ST8SIA4/SIGLEC11/FFAR4/DBH/S100A8/S100A9/HAPLN3/PPARD/FCN1/CRABP1/CRABP2/CD33/RTN4R/PRR7/FABP3/P3H3/FABP5/ALB/FTCD/PCK1/SLC1A3/ACAN/TDO2/NOS3/ALOX5AP/AKR1C2/GRM7/HNF4A/ASS1/SELE/NOS2/GRIN1/GPR143/P4HA3/AGXT/TH/NOS1/BCAN/HAPLN1/MAG/ST8SIA2/FOLR1/PMP2
GO:0004866	endopeptidase inhibitor activity	39/2173	39	MF	149/16967	7.71323e-06	0.000311315	TNFAIP8/SLPI/NAIP/PI3/CD27/TNFSF14/SPINK5/A2ML1/CST6/CST7/NLRP7/SERPING1/SPOCK2/CARD17/COL4A3/WFDC1/CPAMD8/CSTB/C4B/SERPINB3/BST2/CSTA/SERPINA1/HMSD/WFDC2/SERPINB9/SERPINB13/C3/CST2/SPINT1/PCSK1N/WFIKKN2/TFAP2B/C4A/LCN1/SPINK1/BIRC7/ITIH5/AMBP
GO:0032637	interleukin-8 production	25/2341	25	BP	80/17910	1.82698e-05	0.000322206	PTPN22/PTPRC/DDX58/TLR8/TLR7/CD2/TLR3/TLR4/TLR2/TLR1/CD244/TNF/TMSB4X/FCN1/TLR6/CD33/NOD2/LILRA2/LGALS9/IL10/NOS2/IL1B/CHI3L1/LEP/APOA2
GO:0002480	antigen processing and presentation of exogenous peptide antigen via MHC class I, TAP-independent	7/2341	7	BP	9/17910	1.82793e-05	0.000322206	B2M/HLA-B/HLA-F/HLA-C/HLA-E/HLA-H/HLA-G
GO:0002524	hypersensitivity	7/2341	7	BP	9/17910	1.82793e-05	0.000322206	HLA-E/BTK/IL20RB/FCGR2B/CCR7/C3/GATA3
GO:0045576	mast cell activation	20/2341	20	BP	57/17910	1.87058e-05	0.000329044	RASGRP1/CD84/CD226/PIK3CG/LYN/RHOH/BTK/LCP2/LAT2/CD300A/MILR1/CD300LF/S100A12/RAC2/LGALS9/KIT/CNR2/CNR1/TSLP/IL13
GO:0005539	glycosaminoglycan binding	48/2173	48	MF	199/16967	8.56098e-06	0.000336192	CXCL10/CXCL11/PTPRC/CCL8/CXCL13/PLA2G2D/JCHAIN/TLR2/RPL29/TMEM184A/HAPLN3/NLRP3/RNASE7/CCL7/RSPO3/ADA2/SELL/SPOCK2/LTBP4/RTN4R/FGF1/PGLYRP4/APOB/CEL/NOD2/FGFBP1/ADAMTSL5/ABI3BP/ACAN/IGHM/FGFR2/PODXL2/RSPO4/FGFR4/EVA1C/EPYC/FGF7/ADAMTS3/LAMC2/PF4/COL25A1/BCAN/HAPLN1/CTSG/COMP/SAA1/BMP7/F2
GO:0050878	regulation of body fluid levels	98/2341	98	BP	499/17910	1.91762e-05	0.000336626	IRF1/PLEK/JAK2/OAS2/P2RY12/PIK3CG/LYN/SFN/ALOX12B/FLG2/FLI1/DOCK8/TLR4/DOCK11/KRT1/ABCA12/FLG/KRT16/HSD11B2/VAV1/LCK/LCP2/GPI/F12/PRKCQ/MTCO2P12/APRT/ALOXE3/SCNN1A/TIFAB/HRNR/PRKCH/CLDN4/KDF1/HSPB1/PRKCB/SERPING1/PTPN6/ENTPD2/ANXA8/ITPR1/WNT3A/PTPRO/AQP5/ACER1/CEL/GRHL3/PRKAR1B/F10/WAS/PLCG2/NLRP6/ADCY8/PIK3R6/VAV3/GRHL1/SCNN1G/TSPAN32/PIK3R5/F7/CD40LG/P2RX1/NOS3/SERPINA1/MMRN1/DMTN/ENPP4/ATP6V1B…
GO:0042612	MHC class I protein complex	7/2436	7	CC	9/18675	1.80337e-05	0.000344143	B2M/HLA-B/HLA-F/HLA-C/HLA-E/HLA-H/HLA-G
GO:0006873	cellular ion homeostasis	103/2341	103	BP	531/17910	2.03407e-05	0.000356337	CXCL10/CXCL11/CXCL9/PTPRC/CCL8/FASLG/CCR5/CD38/CYSLTR1/CCL5/CCR2/CXCL13/JAK2/SLC8A1/CLIC2/PIK3CG/LYN/CCR1/SLC40A1/LCK/C3AR1/XCL1/CLN6/JPH3/S100A8/LRRK2/SLAMF8/S100A9/MS4A1/NCS1/P2RY6/CCL7/PRKCB/MCUB/TMPRSS3/PTPN6/CORO1A/EPO/ITPR1/CCL3/CD52/RHCG/PTH1R/CIB2/PLCG2/ADCY8/GHRL/CD4/ESR1/GPER1/RAB39A/TFR2/SLC4A11/FZD9/GNG3/TPCN2/EDN3/CXCL12/P2RX1/ERFE/ATP6V1B1/CP/TRPV5/BOK/CHRNA9/CD19/LCN2/CD24/S1PR4/RA…
GO:0001772	immunological synapse	15/2436	15	CC	36/18675	1.9263e-05	0.000360101	GZMA/HAVCR2/CD28/RHOH/CD53/SCIMP/GZMB/LCK/PRKCQ/CARD11/CD6/CD3E/CORO1A/ZAP70/SKAP1
GO:0002224	toll-like receptor signaling pathway	38/2341	38	BP	147/17910	2.18861e-05	0.000382627	IRF1/PTPN22/RSAD2/TNIP3/BIRC3/TLR8/CTSS/TLR7/ACOD1/FCRL3/TLR3/PIK3AP1/LYN/TLR10/HAVCR2/TLR4/S100A14/UBA52/BTK/TLR2/TLR1/S100A8/S100A9/TICAM2/TLR6/LGMN/CD300A/SFTPD/ITGB2/CD300LF/IRAK2/APOB/ITGAM/NLRP6/GFI1/ESR1/LILRA2/BPIFB1
GO:0043177	organic acid binding	44/2173	44	MF	178/16967	1.03353e-05	0.000395188	GRIN3A/ST8SIA4/SIGLEC11/FFAR4/DBH/S100A8/S100A9/HAPLN3/PPARD/FCN1/CRABP1/CRABP2/CD33/RTN4R/PRR7/FABP3/P3H3/FABP5/ALB/FTCD/PCK1/SLC1A3/ACAN/TDO2/NOS3/ALOX5AP/AKR1C2/GRM7/HNF4A/ASS1/SELE/NOS2/GRIN1/GPR143/P4HA3/AGXT/TH/NOS1/BCAN/HAPLN1/MAG/ST8SIA2/FOLR1/PMP2
GO:0014068	positive regulation of phosphatidylinositol 3-kinase signaling	25/2341	25	BP	81/17910	2.31775e-05	0.000403552	CCL5/JAK2/PIK3CG/PIK3AP1/LYN/CD28/SEMA4D/HCLS1/FLT3/TNF/PPARD/IL18/PRR5/PTPN6/EPO/HCST/GPER1/SERPINA12/PIK3R5/NCF1/KIT/MYOC/LEP/AGT/F2
GO:0032755	positive regulation of interleukin-6 production	25/2341	25	BP	81/17910	2.31775e-05	0.000403552	IFIH1/DDX58/TLR8/TLR3/LILRB2/AIF1/TLR4/TLR2/TLR1/TNF/SIGLEC16/PAEP/IL33/TLR6/PTAFR/TYROBP/TNFSF4/NOD2/LILRA2/EREG/LGALS9/LILRA5/IL1B/TSLP/INAVA
GO:0002719	negative regulation of cytokine production involved in immune response	12/2341	12	BP	25/17910	2.4117e-05	0.000418208	LILRB1/TBX21/CD96/HLA-F/XCL1/TNF/ARG1/JAK3/BST2/APOA1/IL10/APOA2
GO:0010818	T cell chemotaxis	12/2341	12	BP	25/17910	2.4117e-05	0.000418208	CXCL10/CXCL11/CCL5/CCR2/CXCL13/PIK3CG/TNFSF14/GPR183/S100A7/CXCR3/XCL1/CCL3
GO:0042093	T-helper cell differentiation	20/2341	20	BP	58/17910	2.50689e-05	0.000433835	CD80/PTGER4/CD86/TBX21/SLAMF6/IL27/IL12RB1/IL12B/GPR183/NLRP3/SPN/IL18/JAK3/IL18R1/TNFSF4/LY9/IL23R/GATA3/RORC/CCL19
GO:0002863	positive regulation of inflammatory response to antigenic stimulus	8/2341	8	BP	12/17910	2.5539e-05	0.000441076	CD28/HLA-E/BTK/TNF/LTA/CCR7/C3/CNR1
GO:0030414	peptidase inhibitor activity	40/2173	40	MF	157/16967	1.19483e-05	0.000445152	TNFAIP8/SLPI/NAIP/PI3/CD27/TNFSF14/SPINK5/A2ML1/CST6/CST7/NLRP7/SERPING1/SPOCK2/CARD17/COL4A3/WFDC1/CPAMD8/CSTB/C4B/SERPINB3/BST2/CSTA/SERPINA1/HMSD/WFDC2/GPC3/SERPINB9/SERPINB13/C3/CST2/SPINT1/PCSK1N/WFIKKN2/TFAP2B/C4A/LCN1/SPINK1/BIRC7/ITIH5/AMBP
GO:0061756	leukocyte adhesion to vascular endothelial cell	17/2341	17	BP	45/17910	2.60868e-05	0.000447939	CCR2/VCAM1/GCNT1/TNF/CCL25/SPN/SELL/PTAFR/ITGB2/ITGB7/SELPLG/CXCL12/PODXL2/CX3CR1/SELE/ADD2/LEP
GO:0002716	negative regulation of natural killer cell mediated immunity	9/2341	9	BP	15/17910	2.60935e-05	0.000447939	LILRB1/CD96/HAVCR2/HLA-F/HLA-E/KIR2DL4/LGALS9/SERPINB9/HLA-G
GO:0032645	regulation of granulocyte macrophage colony-stimulating factor production	9/2341	9	BP	15/17910	2.60935e-05	0.000447939	CD80/DDX58/RASGRP1/CD84/IL12B/PAEP/IL18/IL23R/IL1B
GO:0050710	negative regulation of cytokine secretion	23/2341	23	BP	72/17910	2.63075e-05	0.000450707	GBP1/PTPN22/SRGN/PTGER4/LILRB1/TLR8/CD200R1/BANK1/FFAR4/TNF/TMSB4X/NLRP3/NLRP7/TLR6/CARD17/GHRL/FCGR2B/APOA1/LILRA5/IL36RN/IL10/CIDEA/APOA2
GO:0042445	hormone metabolic process	50/2341	50	BP	215/17910	2.85412e-05	0.000487998	IFNG/DDO/HSD11B1/GAL/DUOXA1/HSD11B2/FDX2/TNF/RDH10/ECE2/CRABP1/DUOX1/CRABP2/SDR16C5/AKR1B10/LHB/HSD17B1/KLK6/DKKL1/CACNA1H/HSD17B2/CYP1B1/GFI1/ESR1/AKR1B15/CYP11A1/APOA1/HSD17B14/REN/AKR1C2/FOXE1/IL1B/PCSK1N/GATA3/RDH12/WNT4/DHRS9/CHST8/DUOX2/CYP19A1/FOXA1/PCSK1/RBP4/LEP/PCSK2/CES1/CTSG/CGB3/HSD3B2/CMA1
GO:0045202	synapse	188/2436	188	CC	1091/18675	2.667e-05	0.000488594	GRIN3A/JAK2/SLC8A1/LYN/NSMF/XRN1/RPS2/RPL18A/RPL8/DDN/RPLP2/CPEB3/EEF2/RPS19/NECTIN1/TENM2/RAB3A/RPS3/RPL12/IGSF9/SLC40A1/EIF4EBP1/SEMA4C/TMEM240/C1QC/CPLX1/MYO7A/LRRK2/CBARP/SLC1A6/NDUFS7/NCS1/TULP1/C1QB/DBN1/LRFN1/SEPTIN5/SPTBN2/LRFN4/CNIH2/SHANK1/PRKCB/DCC/EMB/C1QA/SLC6A11/CD3E/CORO1A/ASIC1/MPST/RTN4R/ITPR1/KCNA3/WNT3A/PTPRO/ARC/OLFM2/ZNF804A/SH3GL3/CEL/SLC29A2/PRR7/PRKAR1B/KCNIP3/APC2/CIB2/SN…
GO:0070838	divalent metal ion transport	90/2341	90	BP	454/17910	2.87394e-05	0.000490405	CXCL10/CXCL11/CXCL9/PTPRC/CCL8/FASLG/CCR5/LILRB1/GRIN3A/CYSLTR1/CCL5/CCL4/FCRL3/CD84/SLC8A1/P2RY12/CLIC2/PIK3CG/LYN/LILRB2/CCR1/ATP2C2/SLC40A1/LCK/XCL1/JPH3/STAC3/CBARP/MS4A1/NCS1/P2RY6/CCL2/PRKCB/CD33/MCUB/PTPN6/CORO1A/EPO/ASIC1/ITPR1/CACNA1H/WNT3A/CRHR1/CCL3/PLCG2/PKD1L3/BHLHA15/CD4/SLC39A2/LILRA2/GPER1/CACNA1G/TPCN2/CXCL12/P2RX1/NOS3/CXCR4/CACNA2D2/TRPV5/CHRNA9/LILRA5/CD19/ADCYAP1R1/SLC30A3/ST…
GO:0050691	regulation of defense response to virus by host	15/2341	15	BP	37/17910	2.9186e-05	0.00049548	STAT1/DTX3L/PARP9/LILRB1/DDX58/APOBEC3G/IL27/IL12RB1/IL15/IL12B/AIM2/CGAS/APOBEC3F/IL23R/IL1B
GO:0001913	T cell mediated cytotoxicity	14/2341	14	BP	33/17910	2.92106e-05	0.00049548	B2M/PTPRC/LILRB1/PRF1/HLA-F/IL12RB1/HLA-E/IL7R/IL12B/TSTA3/XCL1/IL23R/FCGR2B/HLA-G
GO:0043032	positive regulation of macrophage activation	14/2341	14	BP	33/17910	2.92106e-05	0.00049548	HAVCR2/TLR4/STAP1/LRRK2/IL33/TLR6/C1QA/ITGB2/CCL3/ITGAM/TTBK1/IL10/SPACA3/IL13
GO:0051209	release of sequestered calcium ion into cytosol	31/2341	31	BP	112/17910	2.94232e-05	0.000496144	CXCL10/CXCL11/CXCL9/PTPRC/FASLG/CCR5/SLC8A1/CLIC2/LYN/LCK/XCL1/JPH3/P2RY6/PTPN6/CORO1A/ITPR1/CCL3/PLCG2/GPER1/TPCN2/CD19/CCR7/PLN/HAP1/JPH4/NOS1/IL13/NTSR1/CCL19/TRDN/F2
GO:0051283	negative regulation of sequestering of calcium ion	31/2341	31	BP	112/17910	2.94232e-05	0.000496144	CXCL10/CXCL11/CXCL9/PTPRC/FASLG/CCR5/SLC8A1/CLIC2/LYN/LCK/XCL1/JPH3/P2RY6/PTPN6/CORO1A/ITPR1/CCL3/PLCG2/GPER1/TPCN2/CD19/CCR7/PLN/HAP1/JPH4/NOS1/IL13/NTSR1/CCL19/TRDN/F2
GO:0044093	positive regulation of molecular function	268/2341	268	BP	1636/17910	2.94239e-05	0.000496144	TRIM22/DTX3L/PARP9/GCH1/IFNG/B2M/GPR65/PTPRC/PYHIN1/FASLG/RGS18/DDX58/CTSS/TNFSF10/CCL5/PLEK/CCR2/CXCL13/ITK/RASGRP1/FCRL3/IL18RAP/TLR3/JAK2/TAGAP/P2RY12/CLIC2/PIK3CG/LYN/EFNA3/NLRC4/NEUROG3/TRIM21/FCGR1A/FPR2/DOCK2/RPS2/DOCK8/TLR4/NCKAP1L/ARHGAP25/UBA52/ARHGAP9/MLKL/DOCK11/CASS4/ARHGAP15/BTK/TLR2/GLRX/TRIM34/SEMA4D/MLST8/FGD2/ARHGDIG/IL12B/ARHGAP30/ARHGAP18/PLCL2/RAB3A/RPS3/GAL/SPTA1/ARAP2/HCLS1…
GO:2000427	positive regulation of apoptotic cell clearance	6/2341	6	BP	7/17910	3.08339e-05	0.000518896	C2/CCL2/CD300LF/C4B/C3/C4A
GO:0006874	cellular calcium ion homeostasis	77/2341	77	BP	375/17910	3.10922e-05	0.000522214	CXCL10/CXCL11/CXCL9/PTPRC/CCL8/FASLG/CCR5/CD38/CYSLTR1/CCL5/CCR2/CXCL13/JAK2/SLC8A1/CLIC2/PIK3CG/LYN/CCR1/LCK/C3AR1/XCL1/JPH3/MS4A1/NCS1/P2RY6/CCL7/PRKCB/MCUB/PTPN6/CORO1A/EPO/ITPR1/CCL3/CD52/PTH1R/CIB2/PLCG2/ADCY8/GHRL/CD4/ESR1/GPER1/FZD9/GNG3/TPCN2/EDN3/CXCL12/P2RX1/TRPV5/BOK/CHRNA9/CD19/CD24/S1PR4/EDN2/ADCYAP1R1/NMU/CCR7/PLN/SLC8A2/HAP1/GRIN1/CNR1/KEL/CCL1/OXT/JPH4/CNGB1/NOS1/IL13/CCKBR/AGT/NT…
GO:0019814	immunoglobulin complex	6/2436	6	CC	7/18675	3.04716e-05	0.000547294	JCHAIN/IGKV3-20/IGHM/CD79A/IGHA2/IGHA1
GO:0009595	detection of biotic stimulus	11/2341	11	BP	22/17910	3.27315e-05	0.000547596	CRTAM/NLRC4/TLR4/TLR2/TLR1/CD1D/NLRP3/TLR6/PGLYRP4/NOD2/C4B
GO:0036037	CD8-positive, alpha-beta T cell activation	11/2341	11	BP	22/17910	3.27315e-05	0.000547596	CD274/IRF1/LILRB1/NCKAP1L/GPR18/HLA-E/CLEC4A/XCL1/SOCS1/EOMES/PAX1
GO:0042802	identical protein binding	270/2173	270	MF	1670/16967	1.5227e-05	0.000553122	GBP1/STAT1/GBP5/GBP4/IFIH1/GCH1/IFIT3/B2M/PTPRC/GIMAP7/GBP3/ABCD2/TAP1/TIGIT/GBP2/CD69/NMI/GIMAP2/LILRB1/DDX58/GRIN3A/CD3G/SAMHD1/CD38/TNFSF10/CCL5/PLEK/SOD2/CCL4/CCR2/RASGRP1/CD84/SLAMF1/CD2/GZMA/IKZF3/TLR3/JAK2/STAT4/APOBEC3G/PIK3CG/PIK3AP1/PRF1/TLR10/WARS1/NLRC4/LILRB2/IKZF2/CD28/TRIM21/S100A2/SFN/LYZ/TLR4/TRIM29/JCHAIN/BTK/PSME2/RPS19/TLR2/BNIPL/TLR1/CD3D/NECTIN1/IL12B/TENM2/DPYD/CD247/LY6G6C…
GO:0099177	regulation of trans-synaptic signaling	80/2341	80	BP	394/17910	3.3201e-05	0.000554367	GRIN3A/CD38/CCR2/JAK2/NSMF/LILRB2/CPEB3/PLCL2/RAB3A/JPH3/TNF/CPLX1/LRRK2/NCS1/KMO/DBN1/SEPTIN5/CCL2/CNIH2/SHANK1/PRKCB/DCC/LGMN/ASIC1/TYROBP/WNT3A/ARC/PRKAR1B/RIN1/FABP5/ADCY8/GHRL/CHRNA6/PLEKHG5/BAIAP3/GPER1/CHRNA3/SLC1A3/LRRTM2/P2RX1/NFATC4/EPHA4/CACNA2D2/ITPKA/CX3CR1/APBA2/NPTX1/SHANK2/CUX2/CBLN1/KIT/CNR2/CHRNB4/NEURL1/EFNB3/SLC8A2/HAP1/ADGRB1/GRIN1/CNR1/IL1B/IGSF9B/OXT/SYT9/CELF4/CACNG4/CHRNB…
GO:0000323	lytic vacuole	122/2436	122	CC	659/18675	3.20893e-05	0.0005546	DTX3L/FASLG/GIMAP5/MNDA/SRGN/DRAM1/TLR8/CTSS/TLR7/RASGRP1/LRMP/MARCHF1/HLA-DOA/TLR3/PIK3CG/LYN/HLA-DRA/PRF1/LYZ/HLA-F/AP1M2/HLA-DMB/TRIM29/HLA-DPA1/UBA52/BTK/HLA-DRB1/IL4I1/RAB3A/HLA-DQA2/VNN1/CD1D/PLA2G4F/HLA-DPB1/DPP7/HLA-DOB/RAB37/PLAC8/HLA-DQA1/S100A7/LAPTM5/C3AR1/TM6SF1/LAT2/MYO7A/LRRK2/CD74/CST7/LAMP3/HCK/ARG1/HRNR/HLA-DQB1/HLA-DMA/PLA2G4E/CDIP1/AKR1B10/HLA-DRB5/GLIPR1/HLA-H/ADA2/LGMN/RNASE…
GO:0005764	lysosome	122/2436	122	CC	659/18675	3.20893e-05	0.0005546	DTX3L/FASLG/GIMAP5/MNDA/SRGN/DRAM1/TLR8/CTSS/TLR7/RASGRP1/LRMP/MARCHF1/HLA-DOA/TLR3/PIK3CG/LYN/HLA-DRA/PRF1/LYZ/HLA-F/AP1M2/HLA-DMB/TRIM29/HLA-DPA1/UBA52/BTK/HLA-DRB1/IL4I1/RAB3A/HLA-DQA2/VNN1/CD1D/PLA2G4F/HLA-DPB1/DPP7/HLA-DOB/RAB37/PLAC8/HLA-DQA1/S100A7/LAPTM5/C3AR1/TM6SF1/LAT2/MYO7A/LRRK2/CD74/CST7/LAMP3/HCK/ARG1/HRNR/HLA-DQB1/HLA-DMA/PLA2G4E/CDIP1/AKR1B10/HLA-DRB5/GLIPR1/HLA-H/ADA2/LGMN/RNASE…
GO:0045071	negative regulation of viral genome replication	20/2341	20	BP	59/17910	3.33018e-05	0.000554965	RSAD2/CCL8/CCL5/IFIT5/APOBEC3G/SLPI/IFIT1/OAS1/OASL/IFITM1/APOBEC3D/RESF1/OAS3/TNF/MX1/APOBEC3A/APOBEC3F/APOBEC3H/ISG15/BST2
GO:0051246	regulation of protein metabolic process	419/2341	419	BP	2700/17910	3.34005e-05	0.000555528	GBP1/CXCL10/PARP14/DTX3L/IRF1/PARP9/IFNG/PTPN22/SAMSN1/PTPRC/BIRC3/PYHIN1/CD80/CYBB/FASLG/CYLD/NMI/JAKMIP1/LILRB1/TLR8/CD86/TNFSF10/PATL2/CCL5/LAX1/TLR7/KRT17/CCR2/RASGRP1/FCRL3/SLAMF1/TNFAIP8/ZC3H12D/TLR3/JAK2/SLPI/CR1L/PIK3CG/PSMB9/LYN/NAIP/PROM2/EFNA3/HAVCR2/WARS1/NLRC4/NSMF/LILRB2/CD28/TRIM21/AIF1/SFN/FCGR1A/XRN1/ALOX12B/FPR2/PI3/IGKV2-29/CFB/LAG3/PPP1R2P1/RPS2/IL27/TLR4/IGKV4-1/IL7/NCKAP1L/E…
GO:0019957	C-C chemokine binding	7/2173	7	MF	9/16967	1.59221e-05	0.000564263	CCR5/CCR2/CCR1/CCR3/CCR6/CXCR4/CCR7
GO:0061135	endopeptidase regulator activity	39/2173	39	MF	154/16967	1.77449e-05	0.000613888	TNFAIP8/SLPI/NAIP/PI3/CD27/TNFSF14/SPINK5/A2ML1/CST6/CST7/NLRP7/SERPING1/SPOCK2/CARD17/COL4A3/WFDC1/CPAMD8/CSTB/C4B/SERPINB3/BST2/CSTA/SERPINA1/HMSD/WFDC2/SERPINB9/SERPINB13/C3/CST2/SPINT1/PCSK1N/WFIKKN2/TFAP2B/C4A/LCN1/SPINK1/BIRC7/ITIH5/AMBP
GO:0012507	ER to Golgi transport vesicle membrane	19/2436	19	CC	55/18675	3.75569e-05	0.000626707	B2M/HLA-B/HLA-DRA/HLA-F/HLA-C/HLA-E/HLA-DPA1/HLA-DRB1/HLA-DQA2/HLA-DPB1/HLA-DQA1/CD74/HLA-DQB1/HLA-DRB5/CNIH2/HLA-H/HLA-DQB2/HLA-G/FOLR1
GO:0042571	immunoglobulin complex, circulating	5/2436	5	CC	5/18675	3.76298e-05	0.000626707	JCHAIN/IGKV3-20/IGHM/IGHA2/IGHA1
GO:0060402	calcium ion transport into cytosol	37/2341	37	BP	145/17910	3.78407e-05	0.000628155	CXCL10/CXCL11/CXCL9/PTPRC/FASLG/CCR5/SLC8A1/CLIC2/LYN/LCK/XCL1/JPH3/MS4A1/P2RY6/PTPN6/CORO1A/EPO/ITPR1/CCL3/PLCG2/CD4/GPER1/TPCN2/TRPV5/CD19/ADCYAP1R1/CCR7/PLN/HAP1/GRIN1/JPH4/NOS1/IL13/NTSR1/CCL19/TRDN/F2
GO:0002428	antigen processing and presentation of peptide antigen via MHC class Ib	5/2341	5	BP	5/17910	3.80115e-05	0.00062855	B2M/HLA-F/HLA-E/TAP2/HLA-G
GO:0072162	metanephric mesenchymal cell differentiation	5/2341	5	BP	5/17910	3.80115e-05	0.00062855	STAT1/TCF21/WNT4/OSR1/PAX2
GO:0090087	regulation of peptide transport	129/2341	129	BP	706/17910	3.91029e-05	0.000645348	GBP1/CD274/IFIH1/IFNG/PTPN22/CRTAM/RSAD2/SRGN/PTGER4/LILRB1/DDX58/TLR8/CD38/CCL5/RASGRP1/CD2/JAK2/SP100/LYN/TLR10/HAVCR2/AIF1/SFN/CD200R1/TLR4/HLA-E/CLEC9A/PIK3R2/CLEC6A/TLR2/TLR1/BANK1/RAB8B/CD244/HCLS1/LCP1/CLEC4E/FFAR4/CD160/AIM2/GPI/TNF/TMSB4X/S100A8/LRRK2/CSF1R/RAB23/CD74/NLRP3/JUP/PPARD/FCN1/PAEP/NLRP7/SOCS1/IL33/TLR6/CD33/DERL3/TNFRSF1B/FERMT1/C1QTNF12/VSNL1/TNFSF4/ITGB2/KCNE1/ITPR1/MIF/NO…
GO:0072511	divalent inorganic cation transport	90/2341	90	BP	458/17910	4.04275e-05	0.000665924	CXCL10/CXCL11/CXCL9/PTPRC/CCL8/FASLG/CCR5/LILRB1/GRIN3A/CYSLTR1/CCL5/CCL4/FCRL3/CD84/SLC8A1/P2RY12/CLIC2/PIK3CG/LYN/LILRB2/CCR1/ATP2C2/SLC40A1/LCK/XCL1/JPH3/STAC3/CBARP/MS4A1/NCS1/P2RY6/CCL2/PRKCB/CD33/MCUB/PTPN6/CORO1A/EPO/ASIC1/ITPR1/CACNA1H/WNT3A/CRHR1/CCL3/PLCG2/PKD1L3/BHLHA15/CD4/SLC39A2/LILRA2/GPER1/CACNA1G/TPCN2/CXCL12/P2RX1/NOS3/CXCR4/CACNA2D2/TRPV5/CHRNA9/LILRA5/CD19/ADCYAP1R1/SLC30A3/ST…
GO:0019932	second-messenger-mediated signaling	74/2341	74	BP	360/17910	4.23623e-05	0.000696452	GBP1/CXCL10/CXCL11/CXCL9/TRAT1/GPR65/PTPRC/CCR5/PLEK/CCL4/SLC8A1/P2RY12/CLIC2/FPR2/VCAM1/SLA2/BTK/TSHR/GAL/PTGER2/CMKLR1/JPH3/MC1R/TNF/CGAS/LAT2/LRRK2/P2RY6/DEFB1/CD3E/ITPR1/CRHR1/CCL3/FPR1/PTH1R/PLCG2/ADCY8/BHLHA15/CD4/MAFA/PTGFR/GPER1/ADGRB2/TPCN2/EDN3/CCR6/ZAP70/CXCR4/TNFSF11/DMTN/S1PR4/EDN2/ADCYAP1R1/CDH13/GNAL/PLN/SELE/HAP1/GRIN1/GPR143/TCP11/NPR1/RUNDC3A/JPH4/PF4/NPPC/SPINK1/GPR78/NOS1/AGT/…
GO:0051282	regulation of sequestering of calcium ion	31/2341	31	BP	114/17910	4.27743e-05	0.000696583	CXCL10/CXCL11/CXCL9/PTPRC/FASLG/CCR5/SLC8A1/CLIC2/LYN/LCK/XCL1/JPH3/P2RY6/PTPN6/CORO1A/ITPR1/CCL3/PLCG2/GPER1/TPCN2/CD19/CCR7/PLN/HAP1/JPH4/NOS1/IL13/NTSR1/CCL19/TRDN/F2
GO:0002710	negative regulation of T cell mediated immunity	10/2341	10	BP	19/17910	4.27777e-05	0.000696583	PTPRC/LILRB1/TBX21/HLA-F/IL7R/XCL1/ARG1/IL20RB/FCGR2B/HLA-G
GO:0002726	positive regulation of T cell cytokine production	10/2341	10	BP	19/17910	4.27777e-05	0.000696583	B2M/RSAD2/XCL1/NLRP3/IL18/SASH3/IL18R1/TNFSF4/IL1B/GATA3
GO:0002827	positive regulation of T-helper 1 type immune response	10/2341	10	BP	19/17910	4.27777e-05	0.000696583	CD80/CCR2/IL12RB1/IL12B/XCL1/IL18/IL18R1/IL23R/IL1B/CCL19
GO:0140131	positive regulation of lymphocyte chemotaxis	10/2341	10	BP	19/17910	4.27777e-05	0.000696583	CCL5/CCL4/CCR2/CXCL13/TNFSF14/S100A7/XCL1/CCL7/CCL3/CXCL14
GO:0032743	positive regulation of interleukin-2 production	13/2341	13	BP	30/17910	4.29608e-05	0.000698235	PTPRC/CD80/CD86/CCR2/CD28/RPS3/PRKCQ/CARD11/SASH3/CD3E/CD4/IL1B/VTCN1
GO:0051222	positive regulation of protein transport	81/2341	81	BP	403/17910	4.31086e-05	0.000699309	CD274/IFIH1/IFNG/PTPN22/CRTAM/PTGER4/DDX58/TLR8/CD38/RASGRP1/CD2/JAK2/HAVCR2/AIF1/SFN/TLR4/HLA-E/CLEC9A/PIK3R2/CLEC6A/TLR2/TLR1/CD244/HCLS1/CLEC4E/CD160/AIM2/GPI/TNF/LRRK2/CSF1R/NLRP3/JUP/PPARD/FCN1/PAEP/IL33/CD33/FERMT1/C1QTNF12/VSNL1/TNFSF4/ITGB2/MIF/NOD2/CCL3/RHOU/IL26/ITGAM/ADCY8/GHRL/BAIAP3/LILRA2/GPER1/TCAF2/RAC2/LGALS9/LILRA5/ADAM8/CLEC5A/IL10/CFTR/NMU/IL1B/TSLP/HCAR2/CCL1/SLC35D3/GATA3/VT…
GO:0032660	regulation of interleukin-17 production	14/2341	14	BP	34/17910	4.3707e-05	0.000707673	IFNG/SLAMF6/TLR4/NCKAP1L/IL15/IL12B/PRKCQ/IL18/TNFSF4/LY9/NOD2/IL23R/IL36RN/CCL1
GO:0070228	regulation of lymphocyte apoptotic process	18/2341	18	BP	51/17910	4.42658e-05	0.000715365	IDO1/CD274/CD3G/CCL5/GIMAP8/DOCK8/IL7R/PDCD1/BTK/CD27/PRKCQ/CD74/JAK3/MIF/LGALS9/ADAM8/IL10/BIRC7
GO:0044706	multi-multicellular organism process	51/2341	51	BP	225/17910	4.91522e-05	0.000792834	IDO1/CD38/ACOD1/APOL2/HAVCR2/BSG/DDO/RPL29/PRDM1/HSD11B2/CLIC5/PPARD/ARG1/CLDN4/ARHGDIB/PTAFR/TEAD3/EPO/DSG1/PNOC/DKKL1/CRHR1/GHRL/PTGFR/ESR1/SLC2A1/KLK14/ENDOU/LGALS9/P2RX1/SH3PXD2B/TFCP2L1/CRHBP/IHH/GJB2/SLC38A3/CNR1/EPYC/IL1B/ADRA2C/OXT/TEKT4/MMP2/WNT4/LIF/MMP9/LEP/AMBP/AGT/PRLR/PSG5
GO:0006875	cellular metal ion homeostasis	91/2341	91	BP	467/17910	5.08441e-05	0.000818581	CXCL10/CXCL11/CXCL9/PTPRC/CCL8/FASLG/CCR5/CD38/CYSLTR1/CCL5/CCR2/CXCL13/JAK2/SLC8A1/CLIC2/PIK3CG/LYN/CCR1/SLC40A1/LCK/C3AR1/XCL1/JPH3/S100A8/S100A9/MS4A1/NCS1/P2RY6/CCL7/PRKCB/MCUB/TMPRSS3/PTPN6/CORO1A/EPO/ITPR1/CCL3/CD52/PTH1R/CIB2/PLCG2/ADCY8/GHRL/CD4/ESR1/GPER1/TFR2/FZD9/GNG3/TPCN2/EDN3/CXCL12/P2RX1/ERFE/CP/TRPV5/BOK/CHRNA9/CD19/LCN2/CD24/S1PR4/EDN2/ADCYAP1R1/SLC30A3/SLC30A2/NMU/KCNMA1/CCR7/PL…
GO:0050871	positive regulation of B cell activation	22/2341	22	BP	70/17910	5.17421e-05	0.000831472	PTPRC/CD38/FCRL3/TBX21/CD28/TLR4/IL7/TNFSF13B/NCKAP1L/BTK/CD27/GPR183/CD74/INPP5D/CARD11/TNFSF4/WNT3A/MIF/NOD2/VAV3/CHRNB2/IL13
GO:0034702	ion channel complex	55/2436	55	CC	249/18675	5.14746e-05	0.000841977	GRIN3A/CLIC2/TTYH3/STAC3/CLIC5/SCNN1A/SCN5A/CLDN4/CNIH2/SHANK1/MCUB/KCNE1/OLFM2/KCNQ2/KCNIP3/PKD1L3/TTYH1/GABRA5/GABRD/CACNA1G/CHRNA3/SCNN1G/CHRNA9/KCNH2/CATSPERB/KCNC1/SHANK2/KCNAB2/KCNK1/CFTR/KCNG4/KCNMA1/HCN2/CHRNB4/KCNJ1/DPP6/GRIN1/CACNG8/KCNN1/GLRA3/BEST2/CNGB1/SCNN1B/GRIA4/CACNG4/GABRG3/CATSPERD/CHRNB2/KCNA4/DPP10/SNAP25/NOS1/CACNA1B/KCNJ4/CHRNA4
GO:0071396	cellular response to lipid	108/2341	108	BP	575/17910	5.26485e-05	0.000843799	CXCL10/PTPN22/TNIP3/CCR5/LILRB1/CCL5/ACOD1/JAK2/LYN/IRF8/NUGGC/HAVCR2/LILRB2/CMPK2/TLR4/IL15/PHEX/TLR2/IL12B/STAP1/MRC1/FLT3/PTGER2/EIF4EBP1/PTGDR/TNF/KLRK1/NDUFA13/NLRP3/KMO/PPARD/HCK/ARG1/P2RY6/NLRP7/CD6/TICAM2/CCL2/IL18/ZNF703/CD180/LY86/PTAFR/TNFRSF1B/WNT11/TNFSF4/IRAK2/AICDA/WNT3A/MAP4K1/APOB/GSTP1/MIF/NOD2/CCL3/SSTR3/CARD17/PTK7/ADCY8/GFI1/WNT6/CYP24A1/PTGFR/ESR1/LILRA2/GPER1/PTK6/PCK1/GJB3…
GO:0032695	negative regulation of interleukin-12 production	9/2341	9	BP	16/17910	5.27066e-05	0.000843799	TIGIT/LILRB1/TLR8/SLAMF1/CMKLR1/JAK3/MEFV/LILRA5/IL10
GO:0050804	modulation of chemical synaptic transmission	79/2341	79	BP	393/17910	5.30442e-05	0.000847617	GRIN3A/CD38/CCR2/JAK2/NSMF/LILRB2/CPEB3/PLCL2/RAB3A/JPH3/TNF/CPLX1/LRRK2/NCS1/KMO/DBN1/SEPTIN5/CCL2/CNIH2/SHANK1/PRKCB/DCC/LGMN/ASIC1/TYROBP/WNT3A/ARC/PRKAR1B/RIN1/ADCY8/GHRL/CHRNA6/PLEKHG5/BAIAP3/GPER1/CHRNA3/SLC1A3/LRRTM2/P2RX1/NFATC4/EPHA4/CACNA2D2/ITPKA/CX3CR1/APBA2/NPTX1/SHANK2/CUX2/CBLN1/KIT/CNR2/CHRNB4/NEURL1/EFNB3/SLC8A2/HAP1/ADGRB1/GRIN1/CNR1/IL1B/IGSF9B/OXT/SYT9/CELF4/CACNG4/CHRNB2/RIMS…
GO:0030003	cellular cation homeostasis	99/2341	99	BP	518/17910	5.35455e-05	0.000853455	CXCL10/CXCL11/CXCL9/PTPRC/CCL8/FASLG/CCR5/CD38/CYSLTR1/CCL5/CCR2/CXCL13/JAK2/SLC8A1/CLIC2/PIK3CG/LYN/CCR1/SLC40A1/LCK/C3AR1/XCL1/CLN6/JPH3/S100A8/LRRK2/SLAMF8/S100A9/MS4A1/NCS1/P2RY6/CCL7/PRKCB/MCUB/TMPRSS3/PTPN6/CORO1A/EPO/ITPR1/CCL3/CD52/PTH1R/CIB2/PLCG2/ADCY8/GHRL/CD4/ESR1/GPER1/RAB39A/TFR2/SLC4A11/FZD9/GNG3/TPCN2/EDN3/CXCL12/P2RX1/ERFE/ATP6V1B1/CP/TRPV5/BOK/CHRNA9/CD19/LCN2/CD24/S1PR4/RAB38/E…
GO:0002291	T cell activation via T cell receptor contact with antigen bound to MHC molecule on antigen presenting cell	7/2341	7	BP	10/17910	5.40086e-05	0.000853455	LILRB1/HAVCR2/HLA-DMB/APBB1IP/FGL2/ITGAL/LGALS9
GO:0032817	regulation of natural killer cell proliferation	7/2341	7	BP	10/17910	5.40086e-05	0.000853455	PTPN22/HLA-E/IL15/IL12B/IL18/IL23R/LEP
GO:0045060	negative thymic T cell selection	7/2341	7	BP	10/17910	5.40086e-05	0.000853455	PTPRC/CD28/DOCK2/CD74/CD3E/ZAP70/CCR7
GO:0098883	synapse pruning	7/2341	7	BP	10/17910	5.40086e-05	0.000853455	C1QC/C1QB/C1QA/ITGAM/EPHA4/CX3CR1/C3
GO:2000425	regulation of apoptotic cell clearance	7/2341	7	BP	10/17910	5.40086e-05	0.000853455	C2/CCL2/CD300LF/C4B/C3/C4A/ALOX15
GO:0097553	calcium ion transmembrane import into cytosol	33/2341	33	BP	126/17910	5.59068e-05	0.000881822	CXCL10/CXCL11/CXCL9/PTPRC/FASLG/CCR5/SLC8A1/CLIC2/LYN/LCK/XCL1/JPH3/P2RY6/PTPN6/CORO1A/ITPR1/CCL3/PLCG2/GPER1/TPCN2/TRPV5/CD19/CCR7/PLN/HAP1/GRIN1/JPH4/NOS1/IL13/NTSR1/CCL19/TRDN/F2
GO:1901615	organic hydroxy compound metabolic process	96/2341	96	BP	500/17910	5.7698e-05	0.000908398	APOL1/GCH1/IFNG/PLEK/APOL2/SULT2B1/CD244/DUOXA1/ISYNA1/FDX2/CLN6/MC1R/TNF/DBH/TM7SF2/RDH10/INPP5D/PPARD/IMPA2/P2RY6/SLC27A2/DUOX1/SDR16C5/AKR1B10/PLCD3/SLC27A5/ABCB11/LGMN/PTAFR/DEGS2/ITGB2/FGF1/LMF1/DKKL1/CACNA1H/APOB/ACER1/CEL/CYP1B1/CYP4F3/ALDH3B2/PTH1R/CDH3/ITGAM/PLCG2/SNCB/GFI1/CYP24A1/GPER1/SERPINA12/PCK1/SLC34A1/PNMT/CYP11A1/APOA1/OCA2/ITPKA/FGFR4/SNAI1/DHCR7/PCSK9/PLD4/CYP4F12/ADCYAP1R1/A…
GO:0032725	positive regulation of granulocyte macrophage colony-stimulating factor production	8/2341	8	BP	13/17910	5.87598e-05	0.00092172	CD80/DDX58/RASGRP1/IL12B/PAEP/IL18/IL23R/IL1B
GO:0098543	detection of other organism	8/2341	8	BP	13/17910	5.87598e-05	0.00092172	NLRC4/TLR4/TLR2/TLR1/CD1D/TLR6/PGLYRP4/NOD2
GO:0042608	T cell receptor binding	6/2173	6	MF	7/16967	2.73425e-05	0.000923921	CD3G/DOCK2/HLA-E/LCK/EPS8L1/CD3E
GO:0035556	intracellular signal transduction	406/2341	406	BP	2624/17910	5.97473e-05	0.000935495	GBP1/STAT1/CXCL10/CXCL11/PARP14/AKAP5/UBD/DDX60/IFIH1/TRIM22/PARP9/CXCL9/IFNG/PTPN22/TRAT1/GPR65/PTPRC/APOL3/TNIP3/BIRC3/PYHIN1/ICOS/CD80/FASLG/CYLD/CCR5/NMI/PTGER4/DDX58/TLR8/CLNK/CD86/CDC42SE2/TNFSF10/CCL5/PLEK/LAX1/TLR7/SOD2/CCL4/NLRC3/CCR2/ITK/RASGRP1/IFIT5/FCRL3/SLAMF1/IL2RA/TLR3/JAK2/SP100/STAT4/TAGAP/SLC8A1/P2RY12/CLIC2/PIK3CG/PIK3AP1/PSMB9/LYN/HAVCR2/CSF2RB/IL10RA/CD28/AIF1/SFN/CD200R1/AL…
GO:0030890	positive regulation of B cell proliferation	15/2341	15	BP	39/17910	6.06473e-05	0.000947849	PTPRC/CD38/FCRL3/TLR4/IL7/TNFSF13B/NCKAP1L/GPR183/CD74/CARD11/WNT3A/MIF/VAV3/CHRNB2/IL13
GO:0012505	endomembrane system	625/2436	625	CC	4213/18675	5.91465e-05	0.000950495	GBP1/PDCD1LG2/CD274/GBP5/GBP4/LAP3/TRIM22/DTX3L/APOL1/GCH1/B2M/IFIT2/PTPRC/GIMAP7/RSAD2/GBP3/TAP1/GBP2/CYBB/MNDA/CCR5/SRGN/TLR8/CTSS/BCL2L14/FCGR1B/ST8SIA4/CD38/LAX1/TLR7/SLA/RASGRP1/LRMP/MARCHF1/ERAP1/HLA-B/ACSL5/HLA-DOA/IL15RA/TLR3/JAK2/ATP8B4/SP140/GIMAP8/P2RY13/SLPI/LYN/HLA-DRA/PRF1/APOL2/BIN2/GGTA1P/HAVCR2/OAS1/NSMF/LILRB2/SNX20/FCGR1A/LYZ/HLA-F/HLA-C/FPR2/FLG2/CD8B/RPL18/VCAM1/CYTIP/AP1M2/S…
GO:0001618	virus receptor activity	23/2173	23	MF	74/16967	3.08873e-05	0.000997317	CD80/CCR5/CD86/SLAMF1/HAVCR1/NECTIN1/MRC1/CR1/NECTIN4/GPR15/ITGB7/CD4/SELPLG/SERPINB3/CXCR4/CD209/ITGB6/CLDN6/CLEC5A/EFNB3/AXL/MOG/CR2
GO:0104005	hijacked molecular function	23/2173	23	MF	74/16967	3.08873e-05	0.000997317	CD80/CCR5/CD86/SLAMF1/HAVCR1/NECTIN1/MRC1/CR1/NECTIN4/GPR15/ITGB7/CD4/SELPLG/SERPINB3/CXCR4/CD209/ITGB6/CLDN6/CLEC5A/EFNB3/AXL/MOG/CR2
GO:0045066	regulatory T cell differentiation	14/2341	14	BP	35/17910	6.41222e-05	0.00100033	IRF1/IFNG/IL2RA/LILRB2/CD28/LAG3/PLA2G2D/CR1/LILRB4/SOCS1/TNFSF4/LGALS9/HLA-G/CTLA4
GO:0048020	CCR chemokine receptor binding	12/2173	12	MF	26/16967	3.20596e-05	0.00101266	STAT1/CCL5/CCL4/CCR2/CXCL13/CCL25/CCRL2/DEFB1/CCL2/CCL7/CCL3/CCL19
GO:0035587	purinergic receptor signaling pathway	13/2341	13	BP	31/17910	6.51655e-05	0.00101475	GPR171/P2RY10/P2RY12/P2RY13/P2RY14/GPR34/NECAB2/P2RY8/P2RY6/PTAFR/GPR87/P2RX1/P2RY2
GO:0032394	MHC class Ib receptor activity	5/2173	5	MF	5/16967	3.43186e-05	0.00103885	LILRB1/KIR2DL4/CD160/KLRK1/KLRC4-KLRK1
GO:0048248	CXCR3 chemokine receptor binding	5/2173	5	MF	5/16967	3.43186e-05	0.00103885	CXCL10/CXCL11/CXCL9/CXCL13/PF4
GO:0051091	positive regulation of DNA-binding transcription factor activity	56/2341	56	BP	257/17910	6.90729e-05	0.00107364	TRIM22/DDX58/IL18RAP/TLR3/JAK2/NLRC4/NEUROG3/TRIM21/TLR4/UBA52/BTK/TLR2/TRIM34/RPS3/HCLS1/AIM2/TRIM14/TNF/PRKCQ/S100A8/S100A9/NLRP3/JUP/PRKCH/CARD11/TLR6/IL18/PRKCB/TNFSF18/IL18R1/ITGB2/IRAK2/WNT3A/NOD2/ADCY8/ZIC2/ESR1/S100A12/LGALS9/CD40LG/TNFSF11/NFAM1/CX3CR1/ADAM8/CYTL1/WNT10B/KIT/IL10/WNT1/NKX2-2/IL1B/FOXA1/NHLH2/AGT/ADGRF1/NEUROG2
GO:0035579	specific granule membrane	26/2436	26	CC	91/18675	6.80103e-05	0.00107409	CYBB/ATP8B4/FPR2/CD53/CLEC12A/RAB37/C3AR1/ITGAL/SLC2A5/AGPAT2/LAIR1/GPR84/SLC27A2/CLEC4D/CD33/TNFRSF1B/FCAR/ITGB2/ITGAM/OLR1/P2RX1/ADAM8/KCNAB2/CLEC5A/CHRNB4/SNAP25
GO:0032652	regulation of interleukin-1 production	27/2341	27	BP	96/17910	6.94051e-05	0.00107685	TLR8/JAK2/HAVCR2/TLR4/AIM2/NLRP3/NLRP7/HSPB1/CD33/TYROBP/GSTP1/NOD2/CCL3/CARD17/MEFV/GHRL/LILRA2/LGALS9/APOA1/CX3CR1/LILRA5/IL10/CCR7/INAVA/SAA1/CCL19/IGHD
GO:0019722	calcium-mediated signaling	44/2341	44	BP	188/17910	7.14396e-05	0.00110641	GBP1/TRAT1/PTPRC/CCR5/PLEK/CCL4/SLC8A1/P2RY12/CLIC2/FPR2/VCAM1/SLA2/BTK/CMKLR1/JPH3/TNF/LAT2/LRRK2/P2RY6/DEFB1/CD3E/ITPR1/CCL3/PLCG2/BHLHA15/CD4/PTGFR/ADGRB2/TPCN2/CCR6/ZAP70/CXCR4/TNFSF11/DMTN/EDN2/CDH13/PLN/SELE/HAP1/GRIN1/GPR143/JPH4/NOS1/TRDN
GO:0051208	sequestering of calcium ion	31/2341	31	BP	117/17910	7.32063e-05	0.00113172	CXCL10/CXCL11/CXCL9/PTPRC/FASLG/CCR5/SLC8A1/CLIC2/LYN/LCK/XCL1/JPH3/P2RY6/PTPN6/CORO1A/ITPR1/CCL3/PLCG2/GPER1/TPCN2/CD19/CCR7/PLN/HAP1/JPH4/NOS1/IL13/NTSR1/CCL19/TRDN/F2
GO:0002438	acute inflammatory response to antigenic stimulus	10/2341	10	BP	20/17910	7.55322e-05	0.00116347	HLA-E/BTK/CD6/IL20RB/FCGR2B/CXCR2/CCR7/C3/CNR1/GATA3
GO:0032816	positive regulation of natural killer cell activation	10/2341	10	BP	20/17910	7.55322e-05	0.00116347	RASGRP1/HLA-F/HLA-E/IL15/IL12B/TOX/IL18/TYROBP/IL23R/AXL
GO:1990351	transporter complex	59/2436	59	CC	276/18675	7.52032e-05	0.00116756	GRIN3A/CLIC2/TIMM13/TTYH3/STAC3/CLIC5/ATP12A/SCNN1A/SCN5A/CLDN4/CNIH2/SHANK1/MCUB/KCNE1/OLFM2/KCNQ2/KCNIP3/PKD1L3/TTYH1/GABRA5/GABRD/CACNA1G/CHRNA3/SCNN1G/CHRNA9/KCNH2/CATSPERB/KCNC1/SHANK2/KCNAB2/KCNK1/CFTR/KCNG4/KCNMA1/HCN2/CHRNB4/PLN/KCNJ1/DPP6/GRIN1/CACNG8/KCNN1/GLRA3/BEST2/CNGB1/SCNN1B/ABCG8/GRIA4/CACNG4/GABRG3/CATSPERD/CHRNB2/KCNA4/DPP10/SNAP25/NOS1/CACNA1B/KCNJ4/CHRNA4
GO:0019731	antibacterial humoral response	16/2341	16	BP	44/17910	7.70086e-05	0.00118408	SLPI/HLA-E/JCHAIN/KLK5/SPINK5/IGKV3-20/RNASE7/KLK7/DEFB1/SFTPD/RNASE6/IGHM/RNASE3/IGHA2/CTSG/IGHA1
GO:0014013	regulation of gliogenesis	33/2341	33	BP	128/17910	7.81516e-05	0.00119949	CCR2/P2RY12/LYN/TLR2/STAP1/GPR183/TNF/PRKCH/CSF1/LTA/C1QA/TNFRSF1B/DLX2/ASCL2/CCL3/CXCR4/EMX1/EPHA4/SOX11/CX3CR1/TTBK1/DLX1/NKX2-2/SPINT1/IL1B/ASPA/LIF/LRP2/CHRM1/MAG/DAB1/F2/NR2E1
GO:0001664	G protein-coupled receptor binding	47/2173	47	MF	205/16967	4.24667e-05	0.00125927	STAT1/CXCL10/CXCL11/CXCL9/CCL5/CCL4/CCR2/CXCL13/JAK2/S100A14/GAL/XCL1/NECAB2/CCL25/CCRL2/FCN1/DEFB1/CCL2/CCL7/SHANK1/ADA2/WNT11/CCL3/FPR1/GHRL/NPW/EDN3/PALM/CXCL12/WNT3/PPP1R1B/EDN2/MARCO/NMU/WNT1/C3/ADRA2C/CCL1/UCHL1/OXT/PF4/MYOC/CCKBR/AGT/SAA1/CXCL14/CCL19
GO:1902495	transmembrane transporter complex	58/2436	58	CC	271/18675	8.32145e-05	0.00127041	GRIN3A/CLIC2/TTYH3/STAC3/CLIC5/ATP12A/SCNN1A/SCN5A/CLDN4/CNIH2/SHANK1/MCUB/KCNE1/OLFM2/KCNQ2/KCNIP3/PKD1L3/TTYH1/GABRA5/GABRD/CACNA1G/CHRNA3/SCNN1G/CHRNA9/KCNH2/CATSPERB/KCNC1/SHANK2/KCNAB2/KCNK1/CFTR/KCNG4/KCNMA1/HCN2/CHRNB4/PLN/KCNJ1/DPP6/GRIN1/CACNG8/KCNN1/GLRA3/BEST2/CNGB1/SCNN1B/ABCG8/GRIA4/CACNG4/GABRG3/CATSPERD/CHRNB2/KCNA4/DPP10/SNAP25/NOS1/CACNA1B/KCNJ4/CHRNA4
GO:0032102	negative regulation of response to external stimulus	70/2341	70	BP	343/17910	8.51002e-05	0.0013038	PTPRC/ABCD2/PTGER4/GRIN3A/ACOD1/NLRC3/CXCL13/IL2RA/HAVCR2/AIF1/CD200R1/FPR2/GPR18/EPPK1/KRT1/RPS19/SIGLEC11/IL12B/STAP1/FGL2/SIGLEC10/FFAR4/F12/SPINK5/KLRK1/KLK8/SLAMF8/CST7/NLRP3/AJAP1/NLRP7/CCL2/DHX58/NLRX1/SERPING1/TNFRSF1B/C1QTNF12/RTN4R/WNT3A/PTPRO/GSTP1/MIF/MEFV/IL20RB/NLRP6/WFDC1/GHRL/LILRA2/GPER1/FCGR2B/NOS3/EPHA4/APOA1/WNT3/GP1BA/IL10/CNR2/GRIN1/SLC6A3/KLRC4-KLRK1/GATA3/IL22RA2/WNT4/CYP1…
GO:0150078	positive regulation of neuroinflammatory response	11/2341	11	BP	24/17910	9.01051e-05	0.00137801	STAP1/TNF/LRRK2/IL33/IL18/C1QA/ITGB2/CCL3/ITGAM/TTBK1/IL1B
GO:0090218	positive regulation of lipid kinase activity	14/2341	14	BP	36/17910	9.23726e-05	0.00141017	P2RY12/LYN/FPR2/FLT3/FGFR3/NOD2/VAV3/EEF1A2/CD19/KIT/CCR7/EPHA8/CCL19/F2
GO:0045577	regulation of B cell differentiation	12/2341	12	BP	28/17910	9.65806e-05	0.00146395	CYLD/FCRL3/IKZF3/IL7/NCKAP1L/BTK/CD27/SLAMF8/INPP5D/CARD11/PTPN6/NFAM1
GO:0050869	negative regulation of B cell activation	12/2341	12	BP	28/17910	9.65806e-05	0.00146395	SAMSN1/MNDA/SLA2/BTK/BANK1/INPP5D/CD300A/TYROBP/FOXJ1/FCGR2B/IL10/CTLA4
GO:1902932	positive regulation of alcohol biosynthetic process	12/2341	12	BP	28/17910	9.65806e-05	0.00146395	IFNG/CD244/TNF/P2RY6/PTAFR/FGF1/PTH1R/GPER1/ADCYAP1R1/IL1B/WNT4/NTSR1
GO:2000406	positive regulation of T cell migration	12/2341	12	BP	28/17910	9.65806e-05	0.00146395	CXCL10/CCL5/CCR2/CXCL13/AIF1/DOCK8/TNFSF14/S100A7/XCL1/SPN/CXCL12/ADAM8
GO:0002643	regulation of tolerance induction	9/2341	9	BP	17/17910	9.89961e-05	0.00149526	IDO1/CD274/IL2RA/HAVCR2/LILRB2/PDCD1/CD3E/FOXJ1/HLA-G
GO:0032740	positive regulation of interleukin-17 production	9/2341	9	BP	17/17910	9.89961e-05	0.00149526	SLAMF6/IL15/IL12B/PRKCQ/IL18/LY9/NOD2/IL23R/CCL1
GO:0044456	synapse part	150/2436	150	CC	861/18675	0.000102216	0.00150885	GRIN3A/JAK2/SLC8A1/LYN/NSMF/RPL18A/RPL8/DDN/CPEB3/RPS19/NECTIN1/TENM2/RAB3A/RPS3/RPL12/SLC40A1/EIF4EBP1/SEMA4C/TMEM240/C1QC/CPLX1/LRRK2/CBARP/SLC1A6/NDUFS7/NCS1/TULP1/C1QB/DBN1/LRFN1/SEPTIN5/SPTBN2/LRFN4/CNIH2/SHANK1/PRKCB/DCC/C1QA/SLC6A11/CD3E/RTN4R/ITPR1/KCNA3/WNT3A/PTPRO/ARC/OLFM2/ZNF804A/SH3GL3/CEL/SLC29A2/PRR7/KCNIP3/APC2/SNCB/FABP5/ADCY8/GHRL/CHRNA6/PLEKHG5/BAIAP3/GPER1/GABRA5/GABRD/GRID1/L…
GO:0098588	bounding membrane of organelle	309/2436	309	CC	1955/18675	0.000103004	0.00150885	GBP1/CD274/GBP5/GBP4/DTX3L/B2M/PTPRC/RSAD2/GBP3/ABCD2/TAP1/GBP2/CYBB/GIMAP5/DRAM1/TLR8/CD3G/FCGR1B/ST8SIA4/CD38/TLR7/RASGRP1/LRMP/MARCHF1/HLA-B/ACSL5/HLA-DOA/IL15RA/TLR3/MSR1/ATP8B4/HLA-DRA/PROM2/GGTA1P/LILRB2/SNX20/FCGR1A/HLA-F/HLA-C/FPR2/CD8B/AP1M2/SLA2/B4GALT2/CD53/TLR4/NCKAP1L/MGAT4A/RHOV/BSG/HLA-DMB/HLA-E/IL7R/HLA-DPA1/UBA52/GIMAP1/GCNT1/TAP2/SLC9A9/RPS28/TLR2/PKP1/HLA-DRB1/TLR1/CD3D/NAT8B/C…
GO:0098889	intrinsic component of presynaptic membrane	24/2436	24	CC	83/18675	0.000103774	0.00150885	NECTIN1/SLC1A6/SLC6A11/KCNA3/ADCY8/CHRNA6/GABRA5/P2RX1/EPHA4/KCNC1/FXYD6/EFNB3/CNTN6/CNR1/SLC6A3/CDH10/RGS7BP/CADM3/CHRNB2/CHRM1/NTNG1/NRXN1/CHRNA4/CNTNAP4
GO:0042136	neurotransmitter biosynthetic process	27/2341	27	BP	98/17910	0.000102111	0.00153959	GCH1/IFNG/JAK2/AIF1/TLR4/DPYD/TNF/KLRK1/TLR6/ITGB2/CYP1B1/SLC1A3/NOS3/CX3CR1/IL10/ASS1/SLC7A2/NOS2/IL1B/SLC6A3/KLRC4-KLRK1/PTX3/AGXT/TH/HBB/NOS1/AGT
GO:0001895	retina homeostasis	22/2341	22	BP	73/17910	0.000104543	0.00157348	B2M/LYZ/JCHAIN/KRT1/USH1G/IGKC/TULP1/ABCA4/HSPB1/CDH3/CIB2/IGHG3/ALB/CDHR1/RP1L1/RDH12/LCN1/CNGB1/POTEF/PROM1/IGHA2/IGHA1
GO:0002833	positive regulation of response to biotic stimulus	16/2341	16	BP	45/17910	0.000105103	0.00157914	CD274/DDX60/CRTAM/ACOD1/CD226/HAVCR2/IL12B/KLK5/CD160/SIGLEC16/ARG1/KLK7/DHX58/CD180/LY86/MIF
GO:0042590	antigen processing and presentation of exogenous peptide antigen via MHC class I	23/2341	23	BP	78/17910	0.000106485	0.00159708	B2M/TAP1/CYBB/FCGR1B/HLA-B/PSMB9/FCGR1A/HLA-F/HLA-C/HLA-E/PSMB8/TAP2/PSME2/CLEC4A/PSMB10/HLA-H/IFI30/NCF2/NCF4/NCF1/CD207/HLA-G/PSMA8
GO:0002475	antigen processing and presentation via MHC class Ib	6/2341	6	BP	8/17910	0.000109584	0.00162363	B2M/HLA-F/HLA-E/TAP2/CD1D/HLA-G
GO:0002883	regulation of hypersensitivity	6/2341	6	BP	8/17910	0.000109584	0.00162363	HLA-E/BTK/IL20RB/FCGR2B/CCR7/C3
GO:0010533	regulation of activation of Janus kinase activity	6/2341	6	BP	8/17910	0.000109584	0.00162363	CCL5/IL12B/SOCS1/CD300A/IL23R/AGT
GO:0035655	interleukin-18-mediated signaling pathway	6/2341	6	BP	8/17910	0.000109584	0.00162363	IL18RAP/IL18BP/TICAM2/IL18/IL18R1/ALOX5
GO:0035744	T-helper 1 cell cytokine production	6/2341	6	BP	8/17910	0.000109584	0.00162363	IL18RAP/IL12B/XCL1/IL18/IL18R1/IL1B
GO:0071351	cellular response to interleukin-18	6/2341	6	BP	8/17910	0.000109584	0.00162363	IL18RAP/IL18BP/TICAM2/IL18/IL18R1/ALOX5
GO:1902715	positive regulation of interferon-gamma secretion	6/2341	6	BP	8/17910	0.000109584	0.00162363	PTPN22/RASGRP1/CD2/CD244/CD160/LGALS9
GO:0045807	positive regulation of endocytosis	35/2341	35	BP	141/17910	0.000110405	0.00163241	B2M/PTPRC/IL15RA/FPR2/DOCK2/NCKAP1L/IL2RB/IL15/STAP1/C2/TNF/LRRK2/TULP1/IL2RG/CCL2/SFTPD/CD300LF/WNT3A/PLCG2/TFR2/C4B/FCGR2B/APOA1/PCSK9/GPC3/C3/SELE/AXL/IL1B/C4A/PTX3/SPACA3/APOA2/CCL19/MBL2
GO:0050790	regulation of catalytic activity	332/2341	332	BP	2116/17910	0.000110558	0.00163241	CXCL10/AKAP5/DTX3L/PARP9/GCH1/IFNG/PTPN22/GPR65/PTPRC/BIRC3/FASLG/NLRC5/RGS18/TNFSF10/CCL5/PLEK/LAX1/CCR2/CXCL13/ITK/RASGRP1/FCRL3/TNFAIP8/GZMA/TLR3/JAK2/TAGAP/P2RY12/P2RY13/SLPI/PIK3CG/PSMB9/LYN/IFIT1/NAIP/PROM2/EFNA3/WARS1/NLRC4/SFN/FCGR1A/FPR2/PI3/RHOH/PPP1R2P1/SLA2/DOCK2/RPS2/DOCK8/TLR4/IL7/NCKAP1L/PSMB8/ARHGAP25/UBA52/ARHGAP9/MLKL/DOCK11/CASS4/ARHGAP15/CD27/SEMA4D/MLST8/FGD2/ARHGDIG/TNFSF14/…
GO:0005773	vacuole	131/2436	131	CC	737/18675	0.000114189	0.00163434	DTX3L/FASLG/GIMAP5/MNDA/SRGN/DRAM1/TLR8/CTSS/TLR7/RASGRP1/LRMP/MARCHF1/HLA-DOA/TLR3/PIK3CG/LYN/HLA-DRA/PRF1/TRIM21/LYZ/HLA-F/AP1M2/HLA-DMB/RUFY4/TRIM29/HLA-DPA1/UBA52/BTK/HLA-DRB1/IL4I1/RAB3A/HLA-DQA2/VNN1/CD1D/PLA2G4F/HLA-DPB1/DPP7/HLA-DOB/RAB37/PLAC8/HLA-DQA1/S100A7/LAPTM5/C3AR1/TM6SF1/LAT2/MYO7A/LRRK2/RAB23/CD74/CST7/TMEM150B/ATG9B/LAMP3/HCK/ARG1/HRNR/HLA-DQB1/HLA-DMA/PLA2G4E/CDIP1/AKR1B10/HLA…
GO:0099240	intrinsic component of synaptic membrane	39/2436	39	CC	164/18675	0.000120042	0.00169166	SLC8A1/NECTIN1/SLC1A6/LRFN1/LRFN4/CNIH2/DCC/SLC6A11/KCNA3/PTPRO/ADCY8/CHRNA6/GABRA5/GABRD/GRID1/LRRTM2/P2RX1/EPHA4/CHRNA9/KCNC1/FXYD6/EFNB3/CNTN6/GRIN1/CNR1/ADRA2C/SLC6A3/CDH10/PLPPR4/RGS7BP/CACNG4/GABRG3/CADM3/CHRNB2/CHRM1/NTNG1/NRXN1/CHRNA4/CNTNAP4
GO:0051223	regulation of protein transport	122/2341	122	BP	677/17910	0.000115986	0.00170808	GBP1/CD274/IFIH1/IFNG/PTPN22/CRTAM/RSAD2/SRGN/PTGER4/LILRB1/DDX58/TLR8/CD38/CCL5/RASGRP1/CD2/JAK2/SP100/LYN/TLR10/HAVCR2/AIF1/SFN/CD200R1/TLR4/HLA-E/CLEC9A/PIK3R2/CLEC6A/TLR2/TLR1/BANK1/CD244/HCLS1/LCP1/CLEC4E/FFAR4/CD160/AIM2/GPI/TNF/TMSB4X/LRRK2/CSF1R/RAB23/NLRP3/JUP/PPARD/FCN1/PAEP/NLRP7/SOCS1/IL33/TLR6/CD33/DERL3/TNFRSF1B/FERMT1/C1QTNF12/VSNL1/TNFSF4/ITGB2/KCNE1/ITPR1/MIF/NOD2/CCL3/RHOU/CARD1…
GO:0051924	regulation of calcium ion transport	53/2341	53	BP	244/17910	0.000116083	0.00170808	CXCL10/CXCL11/CXCL9/LILRB1/CCL5/CCL4/FCRL3/CD84/SLC8A1/P2RY12/CLIC2/PIK3CG/LYN/LILRB2/CCR1/ATP2C2/XCL1/JPH3/STAC3/CBARP/P2RY6/CCL2/CD33/PTPN6/CORO1A/EPO/CRHR1/CCL3/PLCG2/CD4/LILRA2/GPER1/CXCL12/P2RX1/NOS3/CXCR4/LILRA5/CD19/ADCYAP1R1/STAC2/PLN/HAP1/GRIN1/JPH4/SPINK1/GRM6/NOS1/IL13/CACNA1B/AGT/NTSR1/TRDN/F2
GO:0030134	COPII-coated ER to Golgi transport vesicle	21/2436	21	CC	69/18675	0.000123951	0.00172029	B2M/HLA-B/HLA-DRA/HLA-F/HLA-C/HLA-E/HLA-DPA1/HLA-DRB1/HLA-DQA2/HLA-DPB1/HLA-DQA1/CD74/HLA-DQB1/HLA-DRB5/CNIH2/HLA-H/HLA-DQB2/SERPINA1/PCSK9/HLA-G/FOLR1
GO:0006911	phagocytosis, engulfment	15/2341	15	BP	41/17910	0.000118479	0.00173735	MSR1/BIN2/AIF1/FCGR1A/NCKAP1L/ARHGAP25/STAP1/CD300A/ITGB2/ITGAM/FCGR2B/MARCO/C3/ADGRB1/ALOX15
GO:2000404	regulation of T cell migration	15/2341	15	BP	41/17910	0.000118479	0.00173735	CXCL10/CCL5/CCR2/CXCL13/AIF1/CD200R1/DOCK8/TNFSF14/S100A7/XCL1/SPN/CCR6/CXCL12/ADAM8/RIPOR2
GO:0051235	maintenance of location	60/2341	60	BP	286/17910	0.000120344	0.00176168	CXCL10/CXCL11/CXCL9/PTPRC/FASLG/CCR5/SRGN/SP100/MSR1/SLC8A1/CLIC2/LYN/LCK/S100A7/XCL1/JPH3/TONSL/TNF/TMSB4X/S100A8/ALKBH7/GPAA1/S100A9/JUP/DBN1/P2RY6/SHANK1/PTPN6/CORO1A/ITPR1/APOB/CCL3/PLCG2/CD4/GPER1/ALB/TPCN2/APOA1/CD19/FBN2/LCN2/SLC30A3/PDIA2/SLC30A2/IL10/CCR7/PLN/C3/HAP1/IL1B/CIDEA/MDFI/JPH4/NOS1/LEP/IL13/NTSR1/CCL19/TRDN/F2
GO:0030889	negative regulation of B cell proliferation	8/2341	8	BP	14/17910	0.000121355	0.0017644	MNDA/BTK/INPP5D/CD300A/TYROBP/FCGR2B/IL10/CTLA4
GO:0042976	activation of Janus kinase activity	8/2341	8	BP	14/17910	0.000121355	0.0017644	CCL5/JAK2/IL12B/SOCS1/CD300A/IL23R/AGT/PRLR
GO:0045953	negative regulation of natural killer cell mediated cytotoxicity	8/2341	8	BP	14/17910	0.000121355	0.0017644	LILRB1/HAVCR2/HLA-F/HLA-E/KIR2DL4/LGALS9/SERPINB9/HLA-G
GO:0051770	positive regulation of nitric-oxide synthase biosynthetic process	8/2341	8	BP	14/17910	0.000121355	0.0017644	STAT1/JAK2/TLR4/TLR2/LRRK2/CCL2/NOD2/FCER2
GO:0032732	positive regulation of interleukin-1 production	17/2341	17	BP	50/17910	0.000122272	0.0017717	TLR8/JAK2/HAVCR2/TLR4/AIM2/NLRP3/HSPB1/TYROBP/NOD2/CCL3/LILRA2/LGALS9/LILRA5/INAVA/SAA1/CCL19/IGHD
GO:1905517	macrophage migration	17/2341	17	BP	50/17910	0.000122272	0.0017717	CCL5/CCR2/P2RY12/CD200R1/STAP1/C3AR1/CMKLR1/SLAMF8/CSF1/CCL2/SFTPD/MIF/CCL3/CX3CR1/EDN2/CYP19A1/SAA1
GO:0001562	response to protozoan	10/2341	10	BP	21/17910	0.000127326	0.00184182	CLEC7A/BATF2/IRF8/IL12B/CCDC88B/ARG1/TSPAN32/IL10/VTCN1/PF4
GO:0008285	negative regulation of cell proliferation	133/2341	133	BP	751/17910	0.000129615	0.00187176	STAT1/PDCD1LG2/IDO1/CD274/IRF1/IFNG/IFIT3/CCL8/TNFRSF9/MNDA/PLAAT4/LILRB1/SOD2/NLRC3/IL2RA/JAK2/EAF2/LYN/HAVCR2/WARS1/LILRB2/AIF1/SFN/EPPK1/IL15/BTK/TLR2/BNIPL/SULT2B1/IL12B/SSTR2/IFITM1/GAL/RARRES1/SIRPG/XCL1/MAD1L1/TNF/PEMT/CSF1R/INPP5D/LST1/PPARD/RASSF5/ARG1/PIM2/SPN/CCL2/LTA/OVOL1/KDF1/IFNL1/CD33/VSIG4/FERMT1/CD300A/PTPN6/SFTPD/ASCL2/WNT11/TYROBP/GSTP1/CYP1B1/SSTR3/PTH1R/IL26/FABP3/IL20RB/P3H…
GO:0045684	positive regulation of epidermis development	14/2341	14	BP	37/17910	0.000130834	0.00188617	KRT17/KRT10/SFN/KRT2/SULT2B1/GAL/TNF/PPARD/PRKCH/KDF1/OVOL2/WNT10B/MSX2/IL20
GO:0001787	natural killer cell proliferation	7/2341	7	BP	11/17910	0.000131685	0.00188888	PTPN22/HLA-E/IL15/IL12B/IL18/IL23R/LEP
GO:0097048	dendritic cell apoptotic process	7/2341	7	BP	11/17910	0.000131685	0.00188888	LILRB1/LYN/LGALS9/CXCL12/CCR7/AXL/CCL19
GO:2000668	regulation of dendritic cell apoptotic process	7/2341	7	BP	11/17910	0.000131685	0.00188888	LILRB1/LYN/LGALS9/CXCL12/CCR7/AXL/CCL19
GO:0062023	collagen-containing extracellular matrix	78/2436	78	CC	399/18675	0.000143823	0.0019663	CTSS/SLPI/ADAMDEC1/IL7/KRT1/FLG/COL17A1/EMILIN3/FGL2/S100A7/F12/C1QC/EGFL7/S100A8/S100A9/BCAM/HRNR/FCN1/C1QB/FBN3/C1QA/SERPING1/ENTPD2/COL26A1/ANXA8/LTBP4/COL4A3/MFAP2/COL4A6/CSTB/LAD1/SULF1/ABI3BP/LAMC3/LGALS9/ACAN/F7/CXCL12/SERPINA1/COL4A4/FGFR2/MMRN1/GPC2/APOA1/FBN2/CBLN1/F13A1/GPC3/COL6A5/CDH13/RTBDN/SERPINB9/ADAM11/COL9A3/PRTN3/ADAMTS3/ZP1/LAMC2/MMP2/PF4/COL25A1/COL24A1/MMP9/COCH/ITIH5/TPSB2…
GO:0045589	regulation of regulatory T cell differentiation	13/2341	13	BP	33/17910	0.00014053	0.00201238	IRF1/IFNG/IL2RA/LILRB2/CD28/LAG3/CR1/LILRB4/SOCS1/TNFSF4/LGALS9/HLA-G/CTLA4
GO:0032480	negative regulation of type I interferon production	16/2341	16	BP	46/17910	0.000141761	0.00202259	IFIH1/CYLD/NMI/NLRC5/LILRB1/DDX58/ACOD1/NLRC3/HAVCR2/UBE2L6/UBA7/DHX58/NLRX1/HERC5/ISG15/IL10
GO:0060627	regulation of vesicle-mediated transport	91/2341	91	BP	480/17910	0.000141907	0.00202259	IFNG/B2M/PTPRC/LILRB1/GRIN3A/CCR2/CD84/IL15RA/LYN/PROM2/HLA-F/FPR2/DOCK2/NCKAP1L/IL2RB/RAB25/IL15/TLR2/RAB3A/STAP1/ANKRD13B/C2/TNF/CPLX1/LRRK2/CBARP/NECAB2/NCS1/HCK/TULP1/IL2RG/SEPTIN5/CCL2/CNIH2/PRKCB/PTAFR/CD300A/CORO1A/SFTPD/VSNL1/ITGB2/CD300LF/WNT3A/ARC/SH3GL3/ITGAM/PLCG2/CHRNA6/BAIAP3/MAPK15/TFR2/LGI3/SDC1/C4B/RAC2/LGALS9/FCGR2B/LRRTM2/P2RX1/NDRG4/SLC2A4/PRAM1/APOA1/APBA2/PCSK9/PACSIN1/GPC3/…
GO:0032616	interleukin-13 production	11/2341	11	BP	25/17910	0.000141953	0.00202259	HLA-E/NLRP3/PAEP/IL33/IL18/IFNL1/TNFSF4/LGALS9/LILRA5/TSLP/GATA3
GO:0072606	interleukin-8 secretion	12/2341	12	BP	29/17910	0.000145242	0.00206601	PTPN22/CD2/TLR2/TLR1/CD244/TMSB4X/FCN1/TLR6/LGALS9/NOS2/CHI3L1/LEP
GO:0050701	interleukin-1 secretion	19/2341	19	BP	60/17910	0.000147261	0.00209126	GBP5/TLR8/NLRC4/TLR4/AIM2/NLRP3/NLRP7/TLR6/NOD2/CCL3/CARD17/LILRA2/LGALS9/APOA1/LILRA5/CCR7/SAA1/CCL19/IGHD
GO:0002474	antigen processing and presentation of peptide antigen via MHC class I	26/2341	26	BP	95/17910	0.00015325	0.00217269	B2M/TAP1/CYBB/FCGR1B/ERAP1/HLA-B/PSMB9/FCGR1A/HLA-F/HLA-C/HLA-E/PSMB8/TAP2/ERAP2/PSME2/CLEC4A/PSMB10/HLA-H/IFI30/TAPBPL/NCF2/NCF4/NCF1/CD207/HLA-G/PSMA8
GO:0044853	plasma membrane raft	28/2436	28	CC	106/18675	0.000163754	0.00220587	FASLG/CD8A/JAK2/P2RY12/LCP2/LRRK2/MS4A1/HCK/SCN5A/ITGB2/ITGAM/ADCY8/SELPLG/SLC2A1/CHRNA3/MYO1A/NOS3/ADCYAP1R1/CDH13/SKAP1/KCNMA1/SELE/SLC6A3/PRTN3/CHRNB2/ADD2/CDH15/NOS1
GO:0002712	regulation of B cell mediated immunity	17/2341	17	BP	51/17910	0.000161275	0.00227515	PTPRC/TBX21/CD226/CD28/HLA-E/BTK/XCL1/TNF/CR1/LTA/PTPN6/TNFSF4/FOXJ1/FCGR2B/FCER2/IL10/C3
GO:0002889	regulation of immunoglobulin mediated immune response	17/2341	17	BP	51/17910	0.000161275	0.00227515	PTPRC/TBX21/CD226/CD28/HLA-E/BTK/XCL1/TNF/CR1/LTA/PTPN6/TNFSF4/FOXJ1/FCGR2B/FCER2/IL10/C3
GO:0050702	interleukin-1 beta secretion	17/2341	17	BP	51/17910	0.000161275	0.00227515	GBP5/TLR8/NLRC4/TLR4/AIM2/NLRP3/NLRP7/TLR6/NOD2/CCL3/CARD17/LILRA2/LGALS9/APOA1/LILRA5/CCR7/CCL19
GO:0097060	synaptic membrane	77/2436	77	CC	395/18675	0.000173472	0.0023029	GRIN3A/SLC8A1/NSMF/DDN/CPEB3/NECTIN1/TENM2/SEMA4C/TMEM240/SLC1A6/NDUFS7/NCS1/DBN1/LRFN1/LRFN4/CNIH2/SHANK1/DCC/SLC6A11/KCNA3/PTPRO/ARC/OLFM2/PRR7/FABP5/ADCY8/CHRNA6/GPER1/GABRA5/GABRD/GRID1/CHRNA3/CDH8/PALM/LRRTM2/P2RX1/EPHA4/CHRNA9/LHFPL4/KCNC1/SHANK2/CBLN1/GRM7/FXYD6/CHRNB4/NEURL1/EFNB3/INSYN1/CNTN6/ADGRB1/GRIN1/CNR1/ADRA2C/IL31RA/SLC6A3/LRRC4B/CALB2/IGSF9B/SH2D5/CDH10/GLRA3/PLPPR4/GRIA4/RGS7BP…
GO:1903409	reactive oxygen species biosynthetic process	31/2341	31	BP	122/17910	0.00016891	0.00237894	GCH1/IFNG/ABCD2/CYBB/JAK2/AIF1/TLR4/DUOXA1/TNF/MTCO2P12/KLRK1/DUOX1/TLR6/ITGB2/CYP1B1/NOS3/CX3CR1/IL10/ASS1/SLC7A2/NOS2/ADGRB1/GRIN1/IL1B/KLRC4-KLRK1/PTX3/HBB/DUOX2/NOS1/INAVA/AGT
GO:0101003	ficolin-1-rich granule membrane	19/2436	19	CC	61/18675	0.000183139	0.00239651	LILRB2/FPR2/NCKAP1L/PKP1/DSP/TBC1D10C/CR1/CLEC4C/SIGLEC5/CLEC4D/CD300A/DSG1/FCAR/ITGB2/DSC1/FPR1/SIGLEC14/ENPP4/ADAM8
GO:0032693	negative regulation of interleukin-10 production	9/2341	9	BP	18/17910	0.000175036	0.00245712	PDCD1LG2/IDO1/CD274/LILRB1/IL12B/JAK3/TYROBP/IL23R/FCGR2B
GO:0098581	detection of external biotic stimulus	9/2341	9	BP	18/17910	0.000175036	0.00245712	NLRC4/TLR4/TLR2/TLR1/CD1D/TLR6/PGLYRP4/NOD2/C4B
GO:0051336	regulation of hydrolase activity	193/2341	193	BP	1160/17910	0.000175862	0.00246467	IFNG/GPR65/PTPRC/BIRC3/FASLG/RGS18/TNFSF10/CCL5/PLEK/CXCL13/ITK/RASGRP1/FCRL3/TNFAIP8/GZMA/JAK2/TAGAP/P2RY12/SLPI/PSMB9/LYN/IFIT1/NAIP/PROM2/EFNA3/NLRC4/SFN/PI3/RHOH/PPP1R2P1/DOCK2/DOCK8/NCKAP1L/PSMB8/ARHGAP25/ARHGAP9/DOCK11/ARHGAP15/CD27/SEMA4D/FGD2/ARHGDIG/TNFSF14/ARHGAP30/ARHGAP18/RAB3A/PPP1R14B/RPS3/ARAP2/MYBPC3/CAMSAP3/VAV1/LCK/GPSM1/ELFN2/AIM2/OAS3/TNF/CR1/TMSB4X/S100A8/LRRK2/SPINK5/A2ML1/K…
GO:0098655	cation transmembrane transport	129/2341	129	BP	730/17910	0.000179203	0.00250738	CXCL10/CXCL11/CXCL9/IFNG/PTPRC/FASLG/CCR5/GRIN3A/CTSS/CCR2/SLC8A1/P2RY12/CLIC2/PIK3CG/LYN/ATP5F1D/SLC9A9/SLC12A3/GLRX/MFSD3/ATP2C2/GAL/SLC40A1/LCK/SLC15A1/XCL1/JPH3/STAC3/TMSB4X/MTCO2P12/CBARP/SCNN1A/NCS1/P2RY6/CCL2/SCN5A/ABCB11/CNIH2/SHANK1/NDUFA4L2/SLC31A2/COX4I2/MCUB/PTPN6/CORO1A/EPO/ASIC1/KCNE1/ITPR1/CACNA1H/WNT3A/CRHR1/KCNQ2/KCNU1/CCL3/KCNIP3/PLCG2/PKD1L3/BHLHA15/CHCHD10/GPER1/TTYH1/SLC4A11/…
GO:0032620	interleukin-17 production	14/2341	14	BP	38/17910	0.000182409	0.00254806	IFNG/SLAMF6/TLR4/NCKAP1L/IL15/IL12B/PRKCQ/IL18/TNFSF4/LY9/NOD2/IL23R/IL36RN/CCL1
GO:0048469	cell maturation	39/2341	39	BP	167/17910	0.000187659	0.00261713	SLFN14/IL15/BTK/GAL/LRRK2/RAC3/PAEP/RHEX/POU2F2/DEFB1/REC8/C1QA/ANGPTL8/EPO/IRX5/PTH1R/BHLHA15/EREG/CCR6/DAZL/C1QL1/TFCP2L1/REN/IHH/CFTR/FEV/C3/AXL/EPHA8/TCP11/GATA3/NPPC/SPINK1/CATSPERD/FOXA1/MYOC/HOXB13/CCL19/TDRD5
GO:0046638	positive regulation of alpha-beta T cell differentiation	16/2341	16	BP	47/17910	0.000189077	0.0026326	IFNG/CD80/CD86/NCKAP1L/IL12RB1/IL12B/NLRP3/SOCS1/IL18/SASH3/TNFSF4/IL23R/LGALS9/ZAP70/IHH/CCL19
GO:1904951	positive regulation of establishment of protein localization	84/2341	84	BP	440/17910	0.00019845	0.00275862	CD274/IFIH1/IFNG/PTPN22/CRTAM/PTGER4/DDX58/TLR8/CD38/RASGRP1/CD2/JAK2/HAVCR2/AIF1/SFN/TLR4/HLA-E/CLEC9A/PIK3R2/CLEC6A/TLR2/TLR1/GZMB/CD244/HCLS1/CLEC4E/CD160/AIM2/GPI/TNF/LRRK2/CSF1R/NLRP3/JUP/PPARD/FCN1/PAEP/IL33/CD33/FERMT1/C1QTNF12/VSNL1/PTP4A3/TNFSF4/ITGB2/MIF/NOD2/CCL3/RHOU/IL26/ITGAM/ADCY8/GHRL/BAIAP3/LILRA2/GPER1/TCAF2/RAC2/LGALS9/LILRA5/ADAM8/TP63/CLEC5A/IL10/CFTR/NMU/IL1B/TSLP/HCAR2/CCL1…
GO:0046209	nitric oxide metabolic process	23/2341	23	BP	81/17910	0.000199167	0.00276409	GCH1/IFNG/JAK2/AIF1/TLR4/TLR2/TNF/KLRK1/TLR6/ITGB2/CYP1B1/NOS3/CX3CR1/IL10/ASS1/SLC7A2/NOS2/IL1B/KLRC4-KLRK1/PTX3/HBB/NOS1/AGT
GO:0006809	nitric oxide biosynthetic process	22/2341	22	BP	76/17910	0.000200559	0.00277889	GCH1/IFNG/JAK2/AIF1/TLR4/TNF/KLRK1/TLR6/ITGB2/CYP1B1/NOS3/CX3CR1/IL10/ASS1/SLC7A2/NOS2/IL1B/KLRC4-KLRK1/PTX3/HBB/NOS1/AGT
GO:0002740	negative regulation of cytokine secretion involved in immune response	5/2341	5	BP	6/17910	0.000203273	0.00279386	LILRB1/TNF/APOA1/IL10/APOA2
GO:0002767	immune response-inhibiting cell surface receptor signaling pathway	5/2341	5	BP	6/17910	0.000203273	0.00279386	LILRB1/LYN/LILRB2/KIR2DL1/HLA-G
GO:0030885	regulation of myeloid dendritic cell activation	5/2341	5	BP	6/17910	0.000203273	0.00279386	CD2/HAVCR2/CLEC4D/TSPAN32/IL10
GO:0045349	interferon-alpha biosynthetic process	5/2341	5	BP	6/17910	0.000203273	0.00279386	NMI/TLR8/TLR7/TLR3/IL10
GO:0045354	regulation of interferon-alpha biosynthetic process	5/2341	5	BP	6/17910	0.000203273	0.00279386	NMI/TLR8/TLR7/TLR3/IL10
GO:0099536	synaptic signaling	109/2341	109	BP	601/17910	0.00020468	0.00280487	AKAP5/GRIN3A/CD38/CCR2/JAK2/NSMF/LILRB2/CPEB3/PLCL2/RAB3A/JPH3/TNF/DBH/STAC3/CPLX1/LRRK2/SLC1A6/RAC3/NCS1/KMO/DBN1/SEPTIN5/CCL2/CNIH2/SHANK1/PMCH/PRKCB/DCC/LGMN/ASIC1/TYROBP/WNT3A/ARC/KCNQ2/PRR7/PRKAR1B/RIN1/SNCB/FABP5/ADCY8/GHRL/CHRNA6/PLEKHG5/BAIAP3/GPER1/CACNA1G/CHRNA3/SLC1A3/LRRTM2/P2RX1/NFATC4/EPHA4/CACNA2D2/CHRNA9/ITPKA/CX3CR1/APBA2/NPTX1/SHANK2/LYNX1/CUX2/CBLN1/SYN2/CRHBP/KIT/GRM7/CNR2/CHR…
GO:0006915	apoptotic process	300/2341	300	BP	1907/17910	0.00020473	0.00280487	STAT1/CXCL10/XAF1/IDO1/CD274/UBD/IRF1/IFNG/IFIT3/IFIT2/GPR65/PTPRC/BIRC3/TRIM69/TNFRSF9/CASP5/FASLG/CYLD/MNDA/CCR5/SRGN/DRAM1/LILRB1/CD3G/BCL2L14/CD38/TNFSF10/CCL5/SOD2/CD2/IL2RA/TNFAIP8/GZMA/IKZF3/TLR3/JAK2/SP100/GIMAP8/EAF2/PIK3CG/LYN/PRF1/GZMH/NAIP/EVI2B/NUGGC/NLRC4/NSMF/CD28/AIF1/SFN/DOCK8/TLR4/IL7/NCKAP1L/IL7R/IL2RB/S100A14/UBA52/PDCD1/BTK/CASP7/TLR2/BNIPL/GZMB/CD27/NAT8B/SEMA4D/FGD2/TNFSF14…
GO:0032656	regulation of interleukin-13 production	10/2341	10	BP	22/17910	0.000206155	0.00281537	HLA-E/NLRP3/PAEP/IL33/IFNL1/TNFSF4/LGALS9/LILRA5/TSLP/GATA3
GO:0048305	immunoglobulin secretion	10/2341	10	BP	22/17910	0.000206155	0.00281537	LAX1/TNFSF13B/HLA-E/GPI/TNF/POU2F2/IL33/TNFSF4/CD40LG/RBP4
GO:0016494	C-X-C chemokine receptor activity	6/2173	6	MF	8/16967	9.74227e-05	0.0028311	CXCR6/CXCR3/CXCR4/CXCR2/CXCR1/CXCR5
GO:0001894	tissue homeostasis	47/2341	47	BP	214/17910	0.000209688	0.00285905	B2M/CD38/CCR2/LYZ/TLR4/IL7/JCHAIN/KRT1/ABCA12/USH1G/IGKC/CSF1R/INPP5D/RAC3/SCX/TULP1/ABCA4/CSF1/SASH3/HSPB1/CORO1A/SFTPD/NOD2/PTH1R/CDH3/CIB2/IL20RB/IGHG3/ALB/RAC2/NOS3/TNFSF11/ADAM8/CDHR1/CYTL1/IHH/RP1L1/RDH12/LCN1/CNGB1/POTEF/IL20RA/PROM1/RBP4/INAVA/IGHA2/IGHA1
GO:0002886	regulation of myeloid leukocyte mediated immunity	17/2341	17	BP	52/17910	0.000210713	0.00286845	DDX58/CCR2/CD84/LYN/HLA-E/BTK/ARG1/PTAFR/CD300A/ITGB2/ITGAM/RAC2/LGALS9/FCGR2B/PRAM1/C3/IL13
GO:0032647	regulation of interferon-alpha production	11/2341	11	BP	26/17910	0.000217108	0.00294613	STAT1/IFIH1/NMI/DDX58/TLR8/TLR7/NLRC3/TLR3/HAVCR2/TLR4/IL10
GO:0071624	positive regulation of granulocyte chemotaxis	11/2341	11	BP	26/17910	0.000217108	0.00294613	NCKAP1L/S100A14/S100A7/C3AR1/XCL1/CD74/RAC2/CXCR2/RIPOR2/CCR7/CCL19
GO:0030280	structural constituent of epidermis	8/2173	8	MF	14/16967	0.000104659	0.00298175	KRT10/PI3/KRT1/KRT2/PKP1/FLG/SPRR1A/SPRR2E
GO:0099699	integral component of synaptic membrane	36/2436	36	CC	152/18675	0.000233894	0.00301757	SLC8A1/NECTIN1/SLC1A6/LRFN1/LRFN4/CNIH2/DCC/SLC6A11/KCNA3/PTPRO/ADCY8/CHRNA6/GABRA5/GABRD/GRID1/LRRTM2/P2RX1/EPHA4/CHRNA9/KCNC1/FXYD6/EFNB3/GRIN1/CNR1/ADRA2C/SLC6A3/CDH10/PLPPR4/CACNG4/GABRG3/CADM3/CHRNB2/CHRM1/NRXN1/CHRNA4/CNTNAP4
GO:0060401	cytosolic calcium ion transport	37/2341	37	BP	157/17910	0.000223097	0.0030226	CXCL10/CXCL11/CXCL9/PTPRC/FASLG/CCR5/SLC8A1/CLIC2/LYN/LCK/XCL1/JPH3/MS4A1/P2RY6/PTPN6/CORO1A/EPO/ITPR1/CCL3/PLCG2/CD4/GPER1/TPCN2/TRPV5/CD19/ADCYAP1R1/CCR7/PLN/HAP1/GRIN1/JPH4/NOS1/IL13/NTSR1/CCL19/TRDN/F2
GO:0099537	trans-synaptic signaling	108/2341	108	BP	596/17910	0.000225935	0.0030562	AKAP5/GRIN3A/CD38/CCR2/JAK2/NSMF/LILRB2/CPEB3/PLCL2/RAB3A/JPH3/TNF/DBH/STAC3/CPLX1/LRRK2/SLC1A6/RAC3/NCS1/KMO/DBN1/SEPTIN5/CCL2/CNIH2/SHANK1/PMCH/PRKCB/DCC/LGMN/ASIC1/TYROBP/WNT3A/ARC/KCNQ2/PRKAR1B/RIN1/SNCB/FABP5/ADCY8/GHRL/CHRNA6/PLEKHG5/BAIAP3/GPER1/CACNA1G/CHRNA3/SLC1A3/LRRTM2/P2RX1/NFATC4/EPHA4/CACNA2D2/CHRNA9/ITPKA/CX3CR1/APBA2/NPTX1/SHANK2/LYNX1/CUX2/CBLN1/SYN2/CRHBP/KIT/GRM7/CNR2/CHRNB4/N…
GO:1903428	positive regulation of reactive oxygen species biosynthetic process	18/2341	18	BP	57/17910	0.000226984	0.00306553	IFNG/JAK2/AIF1/TLR4/DUOXA1/TNF/MTCO2P12/KLRK1/TLR6/ITGB2/ASS1/ADGRB1/GRIN1/IL1B/KLRC4-KLRK1/PTX3/HBB/AGT
GO:0032736	positive regulation of interleukin-13 production	8/2341	8	BP	15/17910	0.000230226	0.00309953	HLA-E/NLRP3/PAEP/IL33/TNFSF4/LGALS9/TSLP/GATA3
GO:0046629	gamma-delta T cell activation	8/2341	8	BP	15/17910	0.000230226	0.00309953	PTPRC/LILRB1/NCKAP1L/GPR18/JAG2/CCR9/JAML/NOD2
GO:0016324	apical plasma membrane	61/2436	61	CC	300/18675	0.000247913	0.003154	SLC12A3/SLC19A1/CLIC5/MYO7A/SLC39A4/AJAP1/SCNN1A/SLC2A5/CRB3/P2RY6/DUOX1/SPTBN2/CLDN4/CA4/DSG1/ABCC6/SLC29A4/KCNE1/PTPRO/AQP5/ABCB1/MAL2/RHCG/PTH1R/ADCY8/SLC2A1/SLC26A9/SCNN1G/SLC34A1/MYO1A/BST2/SLC7A5/ATP6V1B1/AMN/TRPV5/CEACAM6/SHANK2/CYP4F12/ACY3/SLC34A3/RIPOR2/KCNK1/CFTR/KCNMA1/EPCAM/OTOA/GPR143/UPK1A/NPC1L1/SCNN1B/ABCG8/CEACAM5/LRP2/DUOX2/GJB6/ECRG4/SLC34A2/SLC5A1/CNTFR/FOLR1/UPK1B
GO:0043550	regulation of lipid kinase activity	19/2341	19	BP	62/17910	0.000238164	0.00320135	P2RY12/LYN/FPR2/SLA2/FLT3/SOCS1/FGFR3/NOD2/PIK3R6/VAV3/PIK3R5/EEF1A2/CD19/KIT/CCR7/EPHA8/CCKBR/CCL19/F2
GO:0032651	regulation of interleukin-1 beta production	23/2341	23	BP	82/17910	0.000243018	0.00326148	TLR8/JAK2/TLR4/AIM2/NLRP3/NLRP7/HSPB1/CD33/TYROBP/GSTP1/NOD2/CCL3/CARD17/MEFV/GHRL/LILRA2/LGALS9/APOA1/CX3CR1/LILRA5/CCR7/INAVA/CCL19
GO:0098793	presynapse	83/2436	83	CC	438/18675	0.000260928	0.00327411	NECTIN1/RAB3A/SLC40A1/SEMA4C/CPLX1/LRRK2/CBARP/SLC1A6/NCS1/TULP1/SEPTIN5/SPTBN2/PRKCB/SLC6A11/RTN4R/KCNA3/WNT3A/ZNF804A/SH3GL3/CEL/SLC29A2/KCNIP3/SNCB/ADCY8/CHRNA6/PLEKHG5/BAIAP3/GPER1/GABRA5/LGI3/P2RX1/EPHA4/ATP6V1B1/SLC2A4/C1QL1/APBA2/KCNC1/PACSIN1/SLC30A3/KCNAB2/SYN2/CRHBP/GRM7/SLC6A17/FXYD6/TMEM163/HRH3/EFNB3/PTPRN/CNTN6/HAP1/GRIN1/CNR1/ADRA2C/IL31RA/SLC6A3/LRRC4B/CALB2/SLC10A4/OXT/SYT9/CDH10…
GO:0070227	lymphocyte apoptotic process	20/2341	20	BP	67/17910	0.00024475	0.00327958	IDO1/CD274/FASLG/CD3G/CCL5/IL2RA/GIMAP8/DOCK8/IL7R/PDCD1/BTK/CD27/PRKCQ/CD74/JAK3/MIF/LGALS9/ADAM8/IL10/BIRC7
GO:0072593	reactive oxygen species metabolic process	56/2341	56	BP	269/17910	0.000245164	0.00327998	GCH1/IFNG/ABCD2/CYBB/ACOD1/SOD2/JAK2/AIF1/FPR2/TLR4/TLR2/DUOXA1/VAV1/TNF/MTCO2P12/LRRK2/KLRK1/NDUFA13/DUOX1/TLR6/SFTPD/NOXA1/TYROBP/ITGB2/NCF2/GSTP1/IFI6/CYP1B1/GPX3/ITGAM/HBA2/RAC2/NOS3/NCF1/SH3PXD2B/CX3CR1/XDH/IL10/ASS1/SLC7A2/NOS2/ADGRB1/GRIN1/IL1B/KLRC4-KLRK1/PTX3/HBA1/HBB/DUOX2/NOS1/LEP/INAVA/AGT/PAX2/BMP7/F2
GO:0002532	production of molecular mediator involved in inflammatory response	21/2341	21	BP	72/17910	0.000247342	0.0032988	IDO1/GBP5/ABCD2/NLRC3/CD96/LYN/TLR4/BTK/RPS19/SLAMF8/NLRP7/CD6/TLR6/ALOX5/NOD2/MEFV/P2RX1/SLC7A2/NOS2/LEP/F2
GO:0032677	regulation of interleukin-8 production	21/2341	21	BP	72/17910	0.000247342	0.0032988	PTPN22/PTPRC/DDX58/TLR8/TLR7/CD2/TLR3/TLR4/TLR2/TLR1/CD244/TNF/TMSB4X/FCN1/TLR6/CD33/NOD2/LGALS9/IL10/IL1B/APOA2
GO:0007268	chemical synaptic transmission	107/2341	107	BP	591/17910	0.000249374	0.00331242	AKAP5/GRIN3A/CD38/CCR2/JAK2/NSMF/LILRB2/CPEB3/PLCL2/RAB3A/JPH3/TNF/DBH/STAC3/CPLX1/LRRK2/SLC1A6/RAC3/NCS1/KMO/DBN1/SEPTIN5/CCL2/CNIH2/SHANK1/PMCH/PRKCB/DCC/LGMN/ASIC1/TYROBP/WNT3A/ARC/KCNQ2/PRKAR1B/RIN1/SNCB/ADCY8/GHRL/CHRNA6/PLEKHG5/BAIAP3/GPER1/CACNA1G/CHRNA3/SLC1A3/LRRTM2/P2RX1/NFATC4/EPHA4/CACNA2D2/CHRNA9/ITPKA/CX3CR1/APBA2/NPTX1/SHANK2/LYNX1/CUX2/CBLN1/SYN2/CRHBP/KIT/GRM7/CNR2/CHRNB4/NEURL1/…
GO:0098916	anterograde trans-synaptic signaling	107/2341	107	BP	591/17910	0.000249374	0.00331242	AKAP5/GRIN3A/CD38/CCR2/JAK2/NSMF/LILRB2/CPEB3/PLCL2/RAB3A/JPH3/TNF/DBH/STAC3/CPLX1/LRRK2/SLC1A6/RAC3/NCS1/KMO/DBN1/SEPTIN5/CCL2/CNIH2/SHANK1/PMCH/PRKCB/DCC/LGMN/ASIC1/TYROBP/WNT3A/ARC/KCNQ2/PRKAR1B/RIN1/SNCB/ADCY8/GHRL/CHRNA6/PLEKHG5/BAIAP3/GPER1/CACNA1G/CHRNA3/SLC1A3/LRRTM2/P2RX1/NFATC4/EPHA4/CACNA2D2/CHRNA9/ITPKA/CX3CR1/APBA2/NPTX1/SHANK2/LYNX1/CUX2/CBLN1/SYN2/CRHBP/KIT/GRM7/CNR2/CHRNB4/NEURL1/…
GO:0002686	negative regulation of leukocyte migration	16/2341	16	BP	48/17910	0.000249526	0.00331242	PTGER4/CD200R1/GPR18/STAP1/KLRK1/CCL25/SLAMF8/IL33/CCL2/CD300A/MIF/GCSAM/CXCL12/RIPOR2/KLRC4-KLRK1/CYP19A1
GO:0071745	IgA immunoglobulin complex	4/2436	4	CC	4/18675	0.000288892	0.00334969	JCHAIN/IGKV3-20/IGHA2/IGHA1
GO:0071746	IgA immunoglobulin complex, circulating	4/2436	4	CC	4/18675	0.000288892	0.00334969	JCHAIN/IGKV3-20/IGHA2/IGHA1
GO:0071748	monomeric IgA immunoglobulin complex	4/2436	4	CC	4/18675	0.000288892	0.00334969	JCHAIN/IGKV3-20/IGHA2/IGHA1
GO:0071749	polymeric IgA immunoglobulin complex	4/2436	4	CC	4/18675	0.000288892	0.00334969	JCHAIN/IGKV3-20/IGHA2/IGHA1
GO:0071751	secretory IgA immunoglobulin complex	4/2436	4	CC	4/18675	0.000288892	0.00334969	JCHAIN/IGKV3-20/IGHA2/IGHA1
GO:0097209	epidermal lamellar body	4/2436	4	CC	4/18675	0.000288892	0.00334969	ABCA12/KLK5/SPINK5/KLK7
GO:0043085	positive regulation of catalytic activity	211/2341	211	BP	1293/17910	0.000270415	0.00358415	DTX3L/GCH1/IFNG/GPR65/PTPRC/FASLG/RGS18/TNFSF10/CCL5/PLEK/CXCL13/ITK/RASGRP1/FCRL3/TLR3/JAK2/TAGAP/P2RY12/PIK3CG/LYN/EFNA3/NLRC4/FCGR1A/FPR2/DOCK2/RPS2/DOCK8/TLR4/NCKAP1L/ARHGAP25/UBA52/ARHGAP9/MLKL/DOCK11/CASS4/ARHGAP15/SEMA4D/MLST8/FGD2/ARHGDIG/IL12B/ARHGAP30/ARHGAP18/RAB3A/RPS3/ARAP2/MYBPC3/STAP1/VAV1/LCK/FLT3/LCP2/AIM2/TNF/PRKCQ/CR1/TMSB4X/S100A8/LRRK2/CSF1R/NDUFA13/CD74/FAS/S100A9/ACAP1/NLRP…
GO:0043551	regulation of phosphatidylinositol 3-kinase activity	17/2341	17	BP	53/17910	0.00027283	0.00361056	P2RY12/LYN/FPR2/SLA2/FLT3/SOCS1/FGFR3/NOD2/PIK3R6/VAV3/PIK3R5/CD19/KIT/CCR7/EPHA8/CCKBR/CCL19
GO:0007565	female pregnancy	43/2341	43	BP	193/17910	0.000275245	0.0036369	IDO1/CD38/ACOD1/APOL2/HAVCR2/BSG/RPL29/PRDM1/HSD11B2/CLIC5/PPARD/ARG1/CLDN4/ARHGDIB/TEAD3/EPO/DSG1/PNOC/CRHR1/GHRL/ESR1/SLC2A1/ENDOU/LGALS9/TFCP2L1/CRHBP/IHH/GJB2/SLC38A3/CNR1/EPYC/IL1B/ADRA2C/OXT/MMP2/WNT4/LIF/MMP9/LEP/AMBP/AGT/PRLR/PSG5
GO:0001891	phagocytic cup	11/2436	11	CC	27/18675	0.000317659	0.0036372	CDC42SE2/BIN2/AIF1/TLR4/ARHGAP25/LCP1/TNF/TICAM2/CORO1A/MYO1G/ADGRB1
GO:0048585	negative regulation of response to stimulus	258/2341	258	BP	1620/17910	0.000275745	0.00363787	GBP1/STAT1/PARP14/PTPN22/SAMSN1/PTPRC/TNIP3/ABCD2/FASLG/CYLD/NMI/NLRC5/RGS18/PTGER4/LILRB1/GRIN3A/SAMHD1/TNFSF10/CCL5/PLEK/LAX1/ACOD1/SOD2/NLRC3/CCR2/CXCL13/FCRL3/CD84/SLAMF1/IL2RA/TLR3/TBX21/CLIC2/CD96/PSMB9/LYN/RNF213/HAVCR2/AIF1/HLA-F/CD200R1/FPR2/RHOH/SLA2/TLR4/IL7/GPR18/HLA-E/EPPK1/IL7R/PSMB8/ARHGAP25/UBA52/PIK3R2/PDCD1/PSME2/KRT1/RPS19/SIGLEC11/BANK1/IL12B/PLCL2/RPS3/VNN1/KIR2DL4/CBLC/STAP1…
GO:0002371	dendritic cell cytokine production	7/2341	7	BP	12/17910	0.000280289	0.0036458	DDX58/TLR3/TLR4/JAK3/NOD2/BST2/KIT
GO:0002468	dendritic cell antigen processing and presentation	7/2341	7	BP	12/17910	0.000280289	0.0036458	CLEC4A/FGL2/CD74/NOD2/FCGR2B/CCR7/CCL19
GO:0006216	cytidine catabolic process	7/2341	7	BP	12/17910	0.000280289	0.0036458	APOBEC3G/APOBEC3D/CDA/APOBEC3A/APOBEC3F/AICDA/APOBEC3H
GO:0009972	cytidine deamination	7/2341	7	BP	12/17910	0.000280289	0.0036458	APOBEC3G/APOBEC3D/CDA/APOBEC3A/APOBEC3F/AICDA/APOBEC3H
GO:0016045	detection of bacterium	7/2341	7	BP	12/17910	0.000280289	0.0036458	NLRC4/TLR2/TLR1/CD1D/TLR6/PGLYRP4/NOD2
GO:0033004	negative regulation of mast cell activation	7/2341	7	BP	12/17910	0.000280289	0.0036458	CD84/CD300A/MILR1/CD300LF/LGALS9/CNR2/CNR1
GO:0045410	positive regulation of interleukin-6 biosynthetic process	7/2341	7	BP	12/17910	0.000280289	0.0036458	TLR1/TNF/TLR6/PTAFR/TYROBP/EREG/IL1B
GO:0046087	cytidine metabolic process	7/2341	7	BP	12/17910	0.000280289	0.0036458	APOBEC3G/APOBEC3D/CDA/APOBEC3A/APOBEC3F/AICDA/APOBEC3H
GO:0070486	leukocyte aggregation	7/2341	7	BP	12/17910	0.000280289	0.0036458	SEMA4D/S100A8/S100A9/RAC2/ZAP70/IL1B/BMP7
GO:0007157	heterophilic cell-cell adhesion via plasma membrane cell adhesion molecules	13/2341	13	BP	35/17910	0.000281037	0.0036458	VCAM1/NECTIN1/LGALS7B/ITGAL/JAML/CD6/SCARF2/CD209/CEACAM6/CBLN1/SELE/CEACAM5/CADM3
GO:0048246	macrophage chemotaxis	13/2341	13	BP	35/17910	0.000281037	0.0036458	CCL5/STAP1/C3AR1/CMKLR1/SLAMF8/CSF1/CCL2/SFTPD/MIF/CCL3/EDN2/CYP19A1/SAA1
GO:0045177	apical part of cell	71/2436	71	CC	365/18675	0.000324413	0.00366867	IFIT5/VCAM1/SLC12A3/SLC19A1/CLIC5/MYO7A/SLC39A4/AJAP1/SCNN1A/SLC2A5/REEP6/CRB3/P2RY6/DUOX1/SPTBN2/CLDN4/ABCB11/CA4/LGMN/DSG1/ABCC6/SLC29A4/KCNE1/PTPRO/MGST1/AQP5/ABCB1/MAL2/RHCG/PTH1R/ADCY8/SLC2A1/SLC26A9/SCNN1G/SLC34A1/MYO1A/BST2/SLC7A5/ATP6V1B1/AMN/TRPV5/CEACAM6/SHANK2/REN/CYP4F12/ACY3/SLC34A3/RIPOR2/KCNK1/CFTR/KCNMA1/EPCAM/HAMP/OTOA/GPR143/EPB41L4B/UPK1A/NPC1L1/SCNN1B/ABCG8/CEACAM5/LRP2/DUOX2/…
GO:0030669	clathrin-coated endocytic vesicle membrane	14/2436	14	CC	40/18675	0.000332576	0.00371511	FCGR1B/HLA-DRA/FCGR1A/HLA-DPA1/HLA-DRB1/HLA-DQA2/HLA-DPB1/HLA-DQA1/CD74/HLA-DQB1/HLA-DRB5/APOB/HLA-DQB2/CD207
GO:0002399	MHC class II protein complex assembly	4/2341	4	BP	4/17910	0.000291243	0.00374507	HLA-DRA/HLA-DMB/HLA-DRB1/HLA-DMA
GO:0002476	antigen processing and presentation of endogenous peptide antigen via MHC class Ib	4/2341	4	BP	4/17910	0.000291243	0.00374507	HLA-F/HLA-E/TAP2/HLA-G
GO:0046136	positive regulation of vitamin metabolic process	4/2341	4	BP	4/17910	0.000291243	0.00374507	IFNG/TNF/RDH10/IL1B
GO:0002578	negative regulation of antigen processing and presentation	6/2341	6	BP	9/17910	0.000292193	0.00374507	HLA-DOA/LILRB2/FGL2/HLA-DOB/TAPBPL/FCGR2B
GO:0002676	regulation of chronic inflammatory response	6/2341	6	BP	9/17910	0.000292193	0.00374507	IDO1/CCL5/TNF/LTA/IL10/CYP19A1
GO:0044848	biological phase	6/2341	6	BP	9/17910	0.000292193	0.00374507	GAL/SPINK5/FERMT1/CDH3/WNT10B/MSX2
GO:0044851	hair cycle phase	6/2341	6	BP	9/17910	0.000292193	0.00374507	GAL/SPINK5/FERMT1/CDH3/WNT10B/MSX2
GO:0048819	regulation of hair follicle maturation	6/2341	6	BP	9/17910	0.000292193	0.00374507	GAL/SPINK5/FERMT1/CDH3/WNT10B/MSX2
GO:0016323	basolateral plasma membrane	44/2436	44	CC	201/18675	0.000339448	0.0037462	CD38/P2RY12/NAIP/PROM2/EPPK1/CLCA2/TSHR/CD1D/TACSTD2/SLC40A1/DSP/SLC19A1/ATP12A/SLC7A7/AJAP1/P2RY6/SLC27A5/CLDN4/PIANP/AQP5/NOD2/SLC29A2/RHCG/PTH1R/ADCY8/SLC2A1/SLC4A11/MYO1A/PALM/NDRG4/ATP6V1B1/CA9/AQP3/RHBG/EPCAM/SLC38A3/SLC8A2/KCNQ4/CEACAM5/MPZ/KCNJ4/KCNJ10/FOLR1/CLDN19
GO:0051767	nitric-oxide synthase biosynthetic process	9/2341	9	BP	19/17910	0.000294069	0.00375785	STAT1/JAK2/TLR4/TLR2/LRRK2/CCL2/GSTP1/NOD2/FCER2
GO:0051769	regulation of nitric-oxide synthase biosynthetic process	9/2341	9	BP	19/17910	0.000294069	0.00375785	STAT1/JAK2/TLR4/TLR2/LRRK2/CCL2/GSTP1/NOD2/FCER2
GO:0034220	ion transmembrane transport	172/2341	172	BP	1028/17910	0.000299116	0.00381664	CXCL10/CXCL11/APOL1/CXCL9/IFNG/PTPRC/CYBB/FASLG/CCR5/GRIN3A/CTSS/CCR2/SLC8A1/P2RY12/CLIC2/PIK3CG/LYN/ATP5F1D/SLC9A9/CLCA2/SLC12A3/GLRX/MFSD3/ATP2C2/GAL/TTYH3/SLC40A1/LCK/SLC15A1/SLC19A1/XCL1/JPH3/STAC3/CLIC5/TMSB4X/MTCO2P12/CBARP/SLC1A6/ATP12A/SLC7A7/SCNN1A/NCS1/P2RY6/SLC25A10/ANO7/CCL2/SCN5A/CLDN4/ABCB11/CNIH2/SLC6A14/SHANK1/NDUFA4L2/EMB/SLC31A2/PTAFR/COX4I2/MCUB/TMC4/PTPN6/CORO1A/EPO/ASIC1/KCNE…
GO:0055082	cellular chemical homeostasis	118/2341	118	BP	666/17910	0.000299701	0.00381839	CXCL10/CXCL11/CXCL9/PTPRC/CCL8/FASLG/CCR5/CD38/CYSLTR1/CCL5/CCR2/CXCL13/JAK2/SLC8A1/CLIC2/PIK3CG/LYN/PIK3R2/CCR1/SLC40A1/LCK/C3AR1/XCL1/CLN6/JPH3/ENDOG/S100A8/LRRK2/SLAMF8/S100A9/MS4A1/NCS1/P2RY6/CCL7/PRKCB/MCUB/TMPRSS3/PTPN6/CORO1A/EPO/C1QTNF12/VSNL1/ITPR1/CCL3/CD52/RHCG/PTH1R/CIB2/PLCG2/ADCY8/GHRL/CD4/ESR1/BAIAP3/GPER1/RAB39A/TFR2/SLC4A11/FZD9/GNG3/PCK1/TPCN2/EDN3/CXCL12/P2RX1/BRSK2/ERFE/ATP6V1…
GO:0045334	clathrin-coated endocytic vesicle	18/2436	18	CC	59/18675	0.000357309	0.00389637	FCGR1B/HLA-DRA/FCGR1A/HLA-DPA1/HLA-DRB1/HLA-DQA2/HLA-DPB1/HLA-DQA1/CD74/HLA-DQB1/HLA-DRB5/SFTPD/APOB/SFTPC/HLA-DQB2/CD207/CTLA4/CPNE6
GO:0099056	integral component of presynaptic membrane	21/2436	21	CC	74/18675	0.000364215	0.00392495	NECTIN1/SLC1A6/SLC6A11/KCNA3/ADCY8/CHRNA6/GABRA5/P2RX1/EPHA4/KCNC1/FXYD6/EFNB3/CNR1/SLC6A3/CDH10/CADM3/CHRNB2/CHRM1/NRXN1/CHRNA4/CNTNAP4
GO:0032703	negative regulation of interleukin-2 production	10/2341	10	BP	23/17910	0.000322175	0.00409862	GBP1/PTPRC/TBX21/HAVCR2/LAG3/XCL1/VSIG4/SFTPD/IL20RB/GATA3
GO:0035456	response to interferon-beta	11/2341	11	BP	27/17910	0.000323325	0.00410713	STAT1/XAF1/IRF1/PYHIN1/MNDA/ACOD1/TLR3/IFITM1/AIM2/NDUFA13/BST2
GO:0034612	response to tumor necrosis factor	58/2341	58	BP	284/17910	0.000323975	0.00410929	GBP1/STAT1/UBD/GCH1/GBP3/BIRC3/TNFRSF9/GBP2/CYLD/CCL5/ACOD1/JAK2/PSMB9/TNFSF8/VCAM1/TNFSF13B/PSMB8/TNFRSF17/PSME2/CD27/TNFSF14/RPS3/AIM2/TNF/ENDOG/TMSB4X/PSMB10/CDIP1/CCL2/LTA/TNFRSF1B/TNFSF18/TNFSF4/TNFSF15/APOB/GSTP1/CCL3/GPER1/PCK1/CD40LG/ADAMTS7/TNFSF11/SLC2A4/APOA1/LCN2/ST18/CD70/CRHBP/ASS1/SELE/HAMP/LTB/GATA3/TNFRSF13B/TCL1A/CHI3L1/PSMA8/ANKRD1
GO:1903793	positive regulation of anion transport	16/2341	16	BP	49/17910	0.000326008	0.00412333	KMO/PTAFR/MIF/ABCB1/FABP3/SLC34A1/ERFE/TNFSF11/APOA1/CFTR/SLC38A3/IL1B/ATP8A2/OXT/AGT/NTSR1
GO:0009887	animal organ morphogenesis	166/2341	166	BP	989/17910	0.000326046	0.00412333	STAT1/ETV7/FASLG/PSMB9/FLI1/IL7/BSG/PSMB8/GCNT1/PHEX/PSME2/NECTIN1/PRDM1/ESRP2/MYBPC3/TACSTD2/SLC40A1/DLX3/USH1G/DSP/JAG2/GAMT/TNF/MYO7A/LRRK2/CSF1R/RAB23/RDH10/LRP5/AJAP1/TIFAB/PSMB10/SCX/ARG1/TULP1/CSF1/ID1/NKD1/CCL2/SCN5A/RSPO3/IRX3/DLX2/TMEM176B/WNT11/FGFR3/FGF1/GRHL2/WNT3A/AQP5/GRHL3/DLX5/IRX5/SERPINB5/PTK7/MFAP2/WNT6/HOXA11/IRX4/FRZB/ESR1/KLK4/ELF3/EREG/FOXJ1/OTX1/SDC1/BCL11B/OVOL2/SLC34A1/…
GO:0034765	regulation of ion transmembrane transport	85/2341	85	BP	453/17910	0.000327706	0.0041382	CXCL10/CXCL11/CXCL9/IFNG/CYBB/CTSS/CCR2/SLC8A1/CLIC2/PIK3CG/LYN/GLRX/GAL/XCL1/JPH3/STAC3/CLIC5/TMSB4X/CBARP/P2RY6/CCL2/SCN5A/CNIH2/SHANK1/PTAFR/PTPN6/CORO1A/EPO/KCNE1/CACNA1H/KCNA3/CRHR1/KCNQ2/KCNK7/ABCB1/KCNU1/KCNIP3/PLCG2/CHCHD10/GPER1/CACNA1G/TCAF2/TPCN2/SLC34A1/EDN3/CACNA2D2/KCNH2/CD19/KCNC1/PCSK9/KCNAB2/CRHBP/STAC2/CFTR/KCNG4/KCNMA1/HCN2/PLN/KCNJ1/HAP1/DPP6/GRIN1/KCNH7/KEL/WNK2/CACNG8/KCNF1/…
GO:0001505	regulation of neurotransmitter levels	64/2341	64	BP	321/17910	0.000329182	0.0041507	GCH1/IFNG/GRIN3A/JAK2/AIF1/TLR4/TLR2/DPYD/RAB3A/TNF/CPLX1/LRRK2/KLRK1/SLC1A6/NCS1/KMO/TLR6/SEPTIN5/PRKCB/ASIC1/ITGB2/CYP1B1/SLC29A2/CHRNA6/BAIAP3/GPER1/CHRNA3/SLC1A3/P2RX1/NOS3/CX3CR1/APBA2/SYN2/IL10/ASS1/CHRNB4/HRH3/SLC7A2/NOS2/CNR1/IL1B/SLC6A3/KLRC4-KLRK1/PTX3/AGXT/SYT9/ENPP6/PHGDH/TH/HBB/GLDC/CHRNB2/RIMS4/WNT7A/SNAP25/NRXN1/NOS1/CACNA1B/AGT/RPH3A/NTSR1/KCNJ10/CHRNA4/RIMS2
GO:0010959	regulation of metal ion transport	71/2341	71	BP	365/17910	0.000342335	0.0043102	CXCL10/CXCL11/CXCL9/B2M/LILRB1/CCL5/CCL4/FCRL3/CD84/SLC8A1/P2RY12/CLIC2/PIK3CG/LYN/LILRB2/GLRX/CCR1/ATP2C2/GAL/XCL1/JPH3/STAC3/CBARP/P2RY6/CCL2/SCN5A/CD33/PTPN6/CORO1A/EPO/KCNE1/CRHR1/CCL3/KCNIP3/PLCG2/CD4/LILRA2/GPER1/EDN3/CXCL12/P2RX1/NOS3/CXCR4/KCNH2/LILRA5/CD19/KCNC1/PCSK9/ADCYAP1R1/KCNAB2/STAC2/PLN/HAP1/DPP6/GRIN1/KEL/WNK2/JPH4/SPINK1/GRM6/OSR1/DPP10/NOS1/GCK/IL13/CACNA1B/AGT/NTSR1/NKX2-5/TR…
GO:0101002	ficolin-1-rich granule	41/2436	41	CC	185/18675	0.00040655	0.00433023	MNDA/CTSS/BIN2/LILRB2/FPR2/NCKAP1L/EEF2/KRT1/PKP1/IMPDH2/FGL2/DSP/TBC1D10C/GPI/CR1/HK3/JUP/FCN1/CDA/CLEC4C/SIGLEC5/CALML5/CLEC4D/GMFG/CD300A/ALOX5/DSG1/FCAR/AMPD3/ITGB2/GSTP1/DSC1/MIF/FPR1/SIGLEC14/CSTB/SERPINA1/ENPP4/ADAM8/HBB/MMP9
GO:0097458	neuron part	239/2436	239	CC	1500/18675	0.000412864	0.00434694	STAT1/IDO1/GCH1/CYBB/GRIN3A/CCR2/SLC8A1/TBX21/LYN/NSMF/AIF1/XRN1/RPL18A/RPL8/DDN/CPEB3/RPS19/RPL28/CCR4/NECTIN1/TENM2/RAB3A/RPS3/GAL/SPTA1/RPL12/IGSF9/SLC40A1/USH1G/TPRN/SEMA4C/ENDOG/CPLX1/MYO7A/LRRK2/CBARP/NECAB2/SLC1A6/KNDC1/ERMN/RAC3/NDUFS7/NCS1/ARG1/TULP1/ABCA4/DBN1/REEP6/LRFN1/SEPTIN5/SPTBN2/LRFN4/CNIH2/HSPB1/SHANK1/PRKCB/DCC/IRX3/TNFRSF1B/SLC6A11/CD3E/TMPRSS3/DPYSL5/CORO1A/MPST/RTN4R/ASTN2/…
GO:0060760	positive regulation of response to cytokine stimulus	17/2341	17	BP	54/17910	0.000350228	0.00440308	PARP14/IFIH1/PARP9/NLRC5/DDX58/TLR4/IL7/TLR2/CD74/AGPAT2/CSF1/TICAM2/CD300LF/TXK/GFI1/AXL/TSLP
GO:0001776	leukocyte homeostasis	23/2341	23	BP	84/17910	0.000356872	0.00447346	CCR2/GPR174/IL2RA/LYN/TNFSF13B/NCKAP1L/TNFRSF17/DOCK11/TNFSF14/SPTA1/GPR183/SLC40A1/FLT3/CD74/SIT1/JAK3/CORO1A/MIF/LGALS9/LMO1/CXCR2/AXL/HCAR2
GO:2001057	reactive nitrogen species metabolic process	23/2341	23	BP	84/17910	0.000356872	0.00447346	GCH1/IFNG/JAK2/AIF1/TLR4/TLR2/TNF/KLRK1/TLR6/ITGB2/CYP1B1/NOS3/CX3CR1/IL10/ASS1/SLC7A2/NOS2/IL1B/KLRC4-KLRK1/PTX3/HBB/NOS1/AGT
GO:0050922	negative regulation of chemotaxis	15/2341	15	BP	45/17910	0.000386655	0.00483262	CXCL13/AIF1/GPR18/STAP1/KLRK1/SLAMF8/CCL2/WNT3A/PTPRO/GSTP1/MIF/WNT3/KLRC4-KLRK1/CYP19A1/ROBO2
GO:0072604	interleukin-6 secretion	15/2341	15	BP	45/17910	0.000386655	0.00483262	IFIH1/PTPN22/DDX58/TLR8/AIF1/CD200R1/BANK1/TNF/PAEP/LILRA2/LGALS9/LILRA5/NOS2/IL1B/LEP
GO:0002755	MyD88-dependent toll-like receptor signaling pathway	13/2341	13	BP	36/17910	0.000387673	0.00483827	IRF1/TLR8/TLR7/TLR10/TLR4/UBA52/BTK/TLR2/TLR1/TLR6/CD300A/CD300LF/IRAK2
GO:1901701	cellular response to oxygen-containing compound	177/2341	177	BP	1068/17910	0.000396061	0.00493575	STAT1/CXCL10/GCH1/PTPN22/TNIP3/CYBB/CCR5/CLEC7A/LILRB1/CCL5/ACOD1/SOD2/IL18RAP/JAK2/SLC8A1/P2RY12/PIK3CG/LYN/IRF8/NUGGC/HAVCR2/NSMF/LILRB2/AIF1/XRN1/CMPK2/FPR2/VCAM1/TLR4/PIK3R2/IL15/CPEB3/PHEX/BTK/TLR2/IL12B/TSHR/RPS3/STAP1/MRC1/PTGER2/EIF4EBP1/PTGDR/TNF/PRKCQ/ENDOG/LRRK2/APRT/MZB1/KLRK1/NDUFA13/NLRP3/SLC2A5/JUP/KMO/PPARD/HCK/ARG1/P2RY6/NLRP7/CD6/SOCS1/TICAM2/ID1/TLR6/AKR1B10/CCL2/CCL7/IL18/ZNF7…
GO:0001916	positive regulation of T cell mediated cytotoxicity	8/2341	8	BP	16/17910	0.000407745	0.00505924	B2M/PTPRC/HLA-F/IL12RB1/HLA-E/IL12B/XCL1/IL23R
GO:0010919	regulation of inositol phosphate biosynthetic process	8/2341	8	BP	16/17910	0.000407745	0.00505924	PLEK/CD244/P2RY6/PTAFR/PTH1R/GPER1/ADCYAP1R1/NTSR1
GO:0034116	positive regulation of heterotypic cell-cell adhesion	8/2341	8	BP	16/17910	0.000407745	0.00505924	LCK/TNF/CEACAM6/IL10/SKAP1/IL1B/ALOX15/BMP7
GO:0023024	MHC class I protein complex binding	5/2173	5	MF	6/16967	0.000183979	0.00514081	KLRD1/CD8A/KLRC1/CD160/TAPBPL
GO:1903901	negative regulation of viral life cycle	23/2341	23	BP	85/17910	0.000429615	0.00532287	RSAD2/CCL8/CCL5/IFIT5/APOBEC3G/SLPI/IFIT1/OAS1/TRIM21/OASL/IFITM1/APOBEC3D/RESF1/OAS3/TNF/MX1/FCN1/APOBEC3A/APOBEC3F/APOBEC3H/ISG15/BST2/PTX3
GO:0043552	positive regulation of phosphatidylinositol 3-kinase activity	12/2341	12	BP	32/17910	0.000433305	0.00535308	P2RY12/LYN/FPR2/FLT3/FGFR3/NOD2/VAV3/CD19/KIT/CCR7/EPHA8/CCL19
GO:0070232	regulation of T cell apoptotic process	12/2341	12	BP	32/17910	0.000433305	0.00535308	IDO1/CD274/CCL5/GIMAP8/DOCK8/IL7R/PDCD1/CD27/PRKCQ/JAK3/LGALS9/ADAM8
GO:0022008	neurogenesis	238/2341	238	BP	1492/17910	0.000436621	0.00538625	B2M/GRIN3A/CD38/CCR2/JAK2/P2RY12/LYN/EFNA3/NSMF/NEUROG3/FPR2/VCAM1/TLR4/CPEB3/EEF2/TLR2/CCR4/SEMA4D/NECTIN1/PRDM1/SPTA1/DUOXA1/STAP1/CAMSAP3/IGSF9/GPR183/SF3A2/USH1G/TPRN/JAG2/TNF/PRKCQ/MYO7A/S100A8/LRRK2/SPINK5/CSF1R/KLK8/KNDC1/S100A9/PAK4/LST1/RAC3/NCS1/TULP1/PRKCH/DBN1/CSF1/ID1/CRABP2/IL33/NKD1/CCL2/LTA/SPTBN2/SHANK1/DCC/IRX3/C1QA/TNFRSF1B/DLX2/CD3E/TEAD3/DPYSL5/EPO/ASCL2/WNT11/RTN4R/GRB7/KLK6…
GO:2000379	positive regulation of reactive oxygen species metabolic process	26/2341	26	BP	101/17910	0.000440226	0.0054229	IFNG/ACOD1/JAK2/AIF1/FPR2/TLR4/DUOXA1/TNF/MTCO2P12/KLRK1/TLR6/TYROBP/ITGB2/GSTP1/ITGAM/XDH/ASS1/ADGRB1/GRIN1/IL1B/KLRC4-KLRK1/PTX3/HBB/LEP/AGT/F2
GO:0005537	mannose binding	8/2173	8	MF	15/16967	0.000199069	0.00545749	BSG/CLEC6A/CLEC4A/MRC1/CLEC17A/CD209/CD207/MBL2
GO:0002479	antigen processing and presentation of exogenous peptide antigen via MHC class I, TAP-dependent	21/2341	21	BP	75/17910	0.000456485	0.0056151	B2M/TAP1/CYBB/FCGR1B/HLA-B/PSMB9/FCGR1A/HLA-F/HLA-C/HLA-E/PSMB8/TAP2/PSME2/PSMB10/HLA-H/NCF2/NCF4/NCF1/CD207/HLA-G/PSMA8
GO:1902531	regulation of intracellular signal transduction	287/2341	287	BP	1838/17910	0.000465386	0.00570005	GBP1/STAT1/PARP14/AKAP5/UBD/DDX60/TRIM22/PARP9/IFNG/PTPN22/TRAT1/PTPRC/APOL3/TNIP3/BIRC3/PYHIN1/ICOS/CD80/FASLG/CYLD/CD86/CDC42SE2/TNFSF10/CCL5/PLEK/LAX1/TLR7/SOD2/CCL4/NLRC3/RASGRP1/IFIT5/FCRL3/SLAMF1/TLR3/JAK2/TAGAP/P2RY12/CLIC2/PIK3CG/PIK3AP1/LYN/HAVCR2/IL10RA/CD28/ALOX12B/FPR2/RHOH/SLA2/TLR4/RHOV/IL7R/ARHGAP25/UBA52/ARHGAP9/PIK3R2/MLKL/SCIMP/IL15/CLEC6A/ARHGAP15/TLR2/CD27/TIFA/SEMA4D/MLST8/FG…
GO:0006801	superoxide metabolic process	19/2341	19	BP	65/17910	0.000465392	0.00570005	GCH1/CYBB/SOD2/FPR2/TNF/DUOX1/NOXA1/TYROBP/ITGB2/NCF2/GSTP1/ITGAM/NOS3/NCF1/SH3PXD2B/NOS2/DUOX2/AGT/BMP7
GO:0071300	cellular response to retinoic acid	19/2341	19	BP	65/17910	0.000465392	0.00570005	LYN/NDUFA13/WNT11/WNT3A/PTK7/WNT6/PTK6/PCK1/GJB3/TBX1/FGFR2/WNT7B/WNT3/WNT10B/FZD10/HOXA2/OSR1/LEP/PAX2
GO:0004869	cysteine-type endopeptidase inhibitor activity	17/2173	17	MF	53/16967	0.000212689	0.00572291	TNFAIP8/NAIP/CD27/TNFSF14/CST6/CST7/CARD17/CSTB/SERPINB3/CSTA/WFDC2/SERPINB9/SERPINB13/CST2/TFAP2B/LCN1/BIRC7
GO:0032607	interferon-alpha production	11/2341	11	BP	28/17910	0.000470041	0.00572419	STAT1/IFIH1/NMI/DDX58/TLR8/TLR7/NLRC3/TLR3/HAVCR2/TLR4/IL10
GO:0042533	tumor necrosis factor biosynthetic process	11/2341	11	BP	28/17910	0.000470041	0.00572419	CYBB/LILRB1/CCR2/TLR4/TLR1/SPN/HSPB1/TYROBP/GHRL/CX3CR1/IL10
GO:0042534	regulation of tumor necrosis factor biosynthetic process	11/2341	11	BP	28/17910	0.000470041	0.00572419	CYBB/LILRB1/CCR2/TLR4/TLR1/SPN/HSPB1/TYROBP/GHRL/CX3CR1/IL10
GO:0048730	epidermis morphogenesis	11/2341	11	BP	28/17910	0.000470041	0.00572419	KRT17/FLG2/FOXQ1/KLK14/FGFR2/TGM3/SNAI1/TP63/FOXE1/FGF7/SOSTDC1
GO:0072073	kidney epithelium development	33/2341	33	BP	140/17910	0.000472594	0.00572604	STAT1/TACSTD2/CRLF1/IRX3/WNT11/FGF1/PTPRO/WNT6/HOXA11/FOXJ1/SDC1/FGFR2/EPHA4/WNT7B/CD24/CXCR2/GPC3/EPCAM/WNT1/HOXD11/IRX2/TCF21/TFAP2B/GATA3/IRX1/WNT4/LIF/PROM1/OSR1/ROBO2/AGT/PAX2/BMP7
GO:0002374	cytokine secretion involved in immune response	9/2341	9	BP	20/17910	0.000472872	0.00572604	LILRB1/TLR2/TNF/NLRP3/TNFRSF1B/NOD2/APOA1/IL10/APOA2
GO:0033630	positive regulation of cell adhesion mediated by integrin	9/2341	9	BP	20/17910	0.000472872	0.00572604	CCL5/CXCL13/P2RY12/NCKAP1L/RAC3/CD3E/FERMT1/PTPN6/SKAP1
GO:0042832	defense response to protozoan	9/2341	9	BP	20/17910	0.000472872	0.00572604	CLEC7A/BATF2/IRF8/IL12B/CCDC88B/ARG1/TSPAN32/IL10/PF4
GO:2000116	regulation of cysteine-type endopeptidase activity	47/2341	47	BP	222/17910	0.000503205	0.00608402	BIRC3/FASLG/TNFSF10/TNFAIP8/JAK2/PSMB9/NAIP/NLRC4/SFN/CD27/TNFSF14/RPS3/LCK/AIM2/TNF/S100A8/NDUFA13/FAS/CST7/S100A9/NLRP3/LAMP3/LGMN/TNFSF15/WNT3A/IFI6/PRR7/MEFV/COL4A3/GPER1/MGMT/LGALS9/P2RX1/BOK/TTBK1/XDH/TP63/ST18/FOXL2/SERPINB9/PERP/GRIN1/TFAP2B/BCL2L10/MMP9/NGFR/PAX2
GO:0048699	generation of neurons	224/2341	224	BP	1398/17910	0.000503858	0.00608402	B2M/GRIN3A/CD38/CCR2/JAK2/P2RY12/LYN/EFNA3/NSMF/NEUROG3/VCAM1/CPEB3/TLR2/CCR4/SEMA4D/NECTIN1/PRDM1/SPTA1/DUOXA1/STAP1/CAMSAP3/IGSF9/GPR183/SF3A2/USH1G/TPRN/JAG2/TNF/PRKCQ/MYO7A/LRRK2/SPINK5/CSF1R/KLK8/KNDC1/S100A9/PAK4/LST1/RAC3/NCS1/TULP1/PRKCH/DBN1/CSF1/ID1/CRABP2/NKD1/LTA/SPTBN2/SHANK1/DCC/IRX3/C1QA/TNFRSF1B/DLX2/CD3E/TEAD3/DPYSL5/EPO/ASCL2/WNT11/RTN4R/GRB7/KLK6/AKNA/WNT3A/PTPRO/ARC/VXN/ZNF804…
GO:0032757	positive regulation of interleukin-8 production	15/2341	15	BP	46/17910	0.000505152	0.00609104	DDX58/TLR8/TLR7/CD2/TLR3/TLR4/TLR2/TLR1/CD244/TNF/FCN1/NOD2/LGALS9/IL1B/APOA2
GO:0098636	protein complex involved in cell adhesion	12/2436	12	CC	33/18675	0.000589711	0.00613836	CD80/LYN/CD28/ITGAD/ITGAL/ITGB2/ITGB7/ITGAM/TSPAN32/ITGB6/CTLA4/ITGB8
GO:0008233	peptidase activity	97/2173	97	MF	536/16967	0.00023393	0.00618	LAP3/CASP5/CYLD/CTSS/GZMK/ERAP1/ADAM28/GZMA/PSMB9/GZMH/ADAMDEC1/CFB/ASPRV1/PSMB8/ERAP2/PHEX/CLCA2/CTSW/CASP7/KLK10/GZMB/KLK5/FGL2/DPP7/CASP14/CASP10/C1S/F12/C2/USP18/KLK13/KLK8/GGT6/CAPNS2/ECE2/PSMB10/UFSP1/TPSG1/KLK7/PRSS27/PRSS8/LGMN/MMP10/TMPRSS3/RHBDL1/USP2/TMPRSS4/KLK6/CARD17/KLK11/MMP17/F10/C1R/KLK4/HTRA4/KLK14/ENDOU/TMPRSS13/F7/CTSE/ADAMTS7/ADAMTS19/TMPRSS11D/ECEL1/ADAM8/REN/PCSK9/PRSS3/IH…
GO:0034767	positive regulation of ion transmembrane transport	35/2341	35	BP	152/17910	0.000515834	0.00621107	CXCL10/CXCL11/CXCL9/IFNG/CTSS/CCR2/GLRX/GAL/XCL1/STAC3/TMSB4X/P2RY6/CCL2/PTAFR/KCNE1/ABCB1/PLCG2/CHCHD10/GPER1/SLC34A1/EDN3/KCNH2/CD19/KCNC1/STAC2/CFTR/HAP1/WNK2/CACNG4/NOS1/IL13/AGT/NTSR1/TRDN/F2
GO:0098660	inorganic ion transmembrane transport	125/2341	125	BP	722/17910	0.000522361	0.00628083	CXCL10/CXCL11/APOL1/CXCL9/PTPRC/FASLG/CCR5/GRIN3A/SLC8A1/P2RY12/CLIC2/PIK3CG/LYN/ATP5F1D/SLC9A9/CLCA2/SLC12A3/GLRX/MFSD3/ATP2C2/GAL/TTYH3/SLC40A1/LCK/SLC15A1/XCL1/JPH3/STAC3/CLIC5/TMSB4X/MTCO2P12/CBARP/SCNN1A/NCS1/P2RY6/SLC25A10/SCN5A/CLDN4/ABCB11/NDUFA4L2/SLC31A2/PTAFR/COX4I2/MCUB/PTPN6/CORO1A/ASIC1/KCNE1/ITPR1/CACNA1H/WNT3A/CRHR1/KCNQ2/KCNU1/CCL3/KCNIP3/PLCG2/PKD1L3/BHLHA15/CHCHD10/GPER1/TTYH1/…
GO:0033691	sialic acid binding	7/2173	7	MF	12/16967	0.000246043	0.00638393	ST8SIA4/SIGLEC11/FCN1/CD33/SELE/MAG/ST8SIA2
GO:0070011	peptidase activity, acting on L-amino acid peptides	93/2173	93	MF	511/16967	0.00025533	0.00641349	LAP3/CASP5/CYLD/CTSS/GZMK/ERAP1/ADAM28/GZMA/PSMB9/GZMH/ADAMDEC1/CFB/ASPRV1/PSMB8/ERAP2/PHEX/CLCA2/CTSW/CASP7/KLK10/GZMB/KLK5/DPP7/CASP14/CASP10/C1S/F12/C2/USP18/KLK13/KLK8/GGT6/CAPNS2/ECE2/PSMB10/UFSP1/TPSG1/KLK7/PRSS27/PRSS8/LGMN/MMP10/TMPRSS3/RHBDL1/USP2/TMPRSS4/KLK6/CARD17/KLK11/MMP17/F10/C1R/KLK4/HTRA4/KLK14/ENDOU/TMPRSS13/F7/CTSE/ADAMTS7/ADAMTS19/TMPRSS11D/ECEL1/ADAM8/REN/PCSK9/PRSS3/TMPRSS9…
GO:0001608	G protein-coupled nucleotide receptor activity	6/2173	6	MF	9/16967	0.000260424	0.00641349	P2RY10/P2RY12/P2RY14/P2RY8/P2RY6/P2RY2
GO:0004126	cytidine deaminase activity	6/2173	6	MF	9/16967	0.000260424	0.00641349	APOBEC3G/CDA/APOBEC3A/APOBEC3F/AICDA/APOBEC3H
GO:0045682	regulation of epidermis development	22/2341	22	BP	81/17910	0.000536302	0.0064146	KRT17/KRT10/SFN/KRT2/SULT2B1/GAL/TNF/SPINK5/PPARD/PRKCH/KDF1/FERMT1/GRHL2/CDH3/GRHL1/OVOL2/TP63/WNT10B/AQP3/MSX2/SERPINB13/IL20
GO:0002864	regulation of acute inflammatory response to antigenic stimulus	7/2341	7	BP	13/17910	0.000538739	0.0064146	HLA-E/BTK/IL20RB/FCGR2B/CCR7/C3/CNR1
GO:0002921	negative regulation of humoral immune response	7/2341	7	BP	13/17910	0.000538739	0.0064146	CR1/SPINK5/VSIG4/SERPING1/PTPN6/FOXJ1/FCGR2B
GO:0035745	T-helper 2 cell cytokine production	7/2341	7	BP	13/17910	0.000538739	0.0064146	RSAD2/TBX21/XCL1/NLRP3/ARG1/DENND1B/GATA3
GO:0044130	negative regulation of growth of symbiont in host	7/2341	7	BP	13/17910	0.000538739	0.0064146	IRF8/IL12B/TNF/LTA/IL10/CTSG/MBL2
GO:0072182	regulation of nephron tubule epithelial cell differentiation	7/2341	7	BP	13/17910	0.000538739	0.0064146	STAT1/CD24/GATA3/LIF/PROM1/OSR1/PAX2
GO:1902713	regulation of interferon-gamma secretion	7/2341	7	BP	13/17910	0.000538739	0.0064146	PTPN22/RASGRP1/CD2/CD244/CD160/LGALS9/IL36RN
GO:0150077	regulation of neuroinflammatory response	16/2341	16	BP	51/17910	0.000541019	0.00643279	PTPRC/CD200R1/STAP1/TNF/LRRK2/CST7/IL33/IL18/C1QA/TNFRSF1B/ITGB2/CCL3/ITGAM/TTBK1/IL1B/MMP9
GO:0034617	tetrahydrobiopterin binding	4/2173	4	MF	4/16967	0.000268394	0.0064996	NOS3/NOS2/TH/NOS1
GO:0070201	regulation of establishment of protein localization	125/2341	125	BP	723/17910	0.000552126	0.00655573	GBP1/CD274/IFIH1/IFNG/PTPN22/CRTAM/RSAD2/SRGN/PTGER4/LILRB1/DDX58/TLR8/CD38/CCL5/RASGRP1/CD2/JAK2/SP100/LYN/TLR10/HAVCR2/AIF1/SFN/CD200R1/TLR4/HLA-E/CLEC9A/PIK3R2/CLEC6A/TLR2/TLR1/GZMB/BANK1/CD244/HCLS1/LCP1/CLEC4E/FFAR4/CD160/AIM2/GPI/TNF/TMSB4X/LRRK2/CSF1R/RAB23/NLRP3/JUP/PPARD/FCN1/PAEP/NLRP7/SOCS1/IL33/TLR6/CD33/DERL3/TNFRSF1B/FERMT1/C1QTNF12/VSNL1/PTP4A3/TNFSF4/ITGB2/KCNE1/ITPR1/MIF/NOD2/CCL…
GO:0048872	homeostasis of number of cells	50/2341	50	BP	241/17910	0.000555271	0.00658392	STAT1/B2M/CYLD/CCR2/GPR174/IL2RA/JAK2/LYN/IL7/TNFSF13B/NCKAP1L/IL7R/IKZF1/TNFRSF17/DOCK11/RPS19/CCR4/TNFSF14/SPTA1/HCLS1/GPR183/SLC40A1/FLT3/CD74/INPP5D/RAC3/SIT1/CSF1/RHEX/CARD11/ETV2/SASH3/JAK3/CORO1A/EPO/AMPD3/MIF/ISG15/IL20RB/LGALS9/NOS3/EMX1/DMTN/LMO1/CXCR2/KIT/CCR7/AXL/HCAR2/GATA3
GO:0031253	cell projection membrane	62/2436	62	CC	317/18675	0.000647887	0.00666814	DDX58/PLEK/IFIT5/P2RY12/PROM2/AIF1/DOCK8/RAB25/SCIMP/DDN/FGD2/RPS3/LCP1/TBC1D10C/S100P/PEMT/EPS8L1/SCNN1A/SLC27A4/BMX/IQCE/ABCA4/CA4/FERMT1/ARHGEF4/SSTR3/PTH1R/APC2/RASGRP2/GPER1/TTYH1/FZD9/SLC34A1/OPN4/PALM/NDRG4/DMTN/CA9/AMN/PDE9A/EPS8L2/CDHR1/KCNC1/SHANK2/PACSIN1/PSD4/SLC34A3/RIPOR2/KCNK1/FSCN1/HLA-G/MXRA8/CNGB1/NPC1L1/PROM1/LRP2/ROBO2/SLC34A2/SLC5A1/GRK1/FOLR1/SNTG1
GO:0034121	regulation of toll-like receptor signaling pathway	20/2341	20	BP	71/17910	0.000567441	0.00671891	IRF1/PTPN22/RSAD2/BIRC3/ACOD1/FCRL3/TLR3/LYN/TLR4/TLR2/TLR1/TICAM2/TLR6/CD300A/CD300LF/NLRP6/GFI1/ESR1/LILRA2/BPIFB1
GO:0042581	specific granule	36/2436	36	CC	160/18675	0.000660691	0.00672436	B2M/CYBB/ATP8B4/SLPI/LYZ/FPR2/DOCK2/CD53/CLEC12A/RAB37/C3AR1/ITGAL/SLC2A5/AGPAT2/JUP/LAIR1/GPR84/ARG1/SLC27A2/CLEC4D/CD33/TNFRSF1B/PTPN6/FCAR/ITGB2/ITGAM/OLR1/P2RX1/ADAM8/LCN2/KCNAB2/CLEC5A/CHRNB4/PTX3/CHI3L1/SNAP25
GO:0071356	cellular response to tumor necrosis factor	54/2341	54	BP	266/17910	0.000592662	0.00700784	GBP1/STAT1/GBP3/BIRC3/TNFRSF9/GBP2/CYLD/CCL5/ACOD1/JAK2/PSMB9/TNFSF8/VCAM1/TNFSF13B/PSMB8/TNFRSF17/PSME2/CD27/TNFSF14/RPS3/AIM2/TNF/TMSB4X/PSMB10/CDIP1/CCL2/LTA/TNFRSF1B/TNFSF18/TNFSF4/TNFSF15/APOB/GSTP1/CCL3/GPER1/PCK1/CD40LG/ADAMTS7/TNFSF11/SLC2A4/APOA1/LCN2/ST18/CD70/CRHBP/ASS1/HAMP/LTB/GATA3/TNFRSF13B/TCL1A/CHI3L1/PSMA8/ANKRD1
GO:0032731	positive regulation of interleukin-1 beta production	14/2341	14	BP	42/17910	0.000600187	0.00707242	TLR8/JAK2/TLR4/AIM2/NLRP3/HSPB1/TYROBP/NOD2/CCL3/LILRA2/LGALS9/LILRA5/INAVA/CCL19
GO:0045429	positive regulation of nitric oxide biosynthetic process	14/2341	14	BP	42/17910	0.000600187	0.00707242	IFNG/JAK2/AIF1/TLR4/TNF/KLRK1/TLR6/ITGB2/ASS1/IL1B/KLRC4-KLRK1/PTX3/HBB/AGT
GO:0071353	cellular response to interleukin-4	12/2341	12	BP	33/17910	0.000600606	0.00707242	PARP14/RPS2/RUFY4/IMPDH2/MRC1/XCL1/ARG1/IL2RG/JAK3/CORO1A/CD300LF/GATA3
GO:0032526	response to retinoic acid	26/2341	26	BP	103/17910	0.000608762	0.00715861	CD38/LYN/NDUFA13/WNT11/WNT3A/HSD17B2/PTK7/WNT6/PTK6/PCK1/GJB3/TBX1/FGFR2/WNT7B/WNT3/WNT10B/AQP3/GJB2/FZD10/HOXA2/OXT/PTGES/OSR1/RBP4/LEP/PAX2
GO:2000147	positive regulation of cell motility	97/2341	97	BP	540/17910	0.000624566	0.00733436	CXCL10/CD274/IFNG/PTPRC/CCL8/CCL5/SOD2/CCL4/CCR2/CXCL13/JAK2/SLC8A1/P2RY12/LYN/NSMF/AIF1/FPR2/DOCK8/NCKAP1L/S100A14/RAB25/CASS4/SEMA4D/CCR1/TNFSF14/S100A7/C3AR1/XCL1/CMKLR1/GPI/TNF/TMSB4X/CSF1R/CD74/P2RY6/CSF1/SPN/DUOX1/FAM83H/DEFB1/CCL7/ZNF703/HSPB1/LGMN/PTAFR/TNFSF18/CORO1A/SPOCK2/WNT11/GRB7/FGF1/CCL3/F10/FGFBP1/FAM110C/GPER1/CCBE1/RHOD/TCAF2/RAC2/SERPINB3/EDN3/CCR6/LGALS9/INSL3/F7/CXCL12/NOS3/…
GO:0032813	tumor necrosis factor receptor superfamily binding	15/2173	15	MF	45/16967	0.000308711	0.0073534	STAT1/FASLG/TNFSF10/TNFSF8/TNFSF13B/TNFSF14/TNF/LTA/TNFSF18/TNFSF4/TNFSF15/CD40LG/TNFSF11/CD70/LTB
GO:0001915	negative regulation of T cell mediated cytotoxicity	5/2341	5	BP	7/17910	0.000634371	0.00736853	PTPRC/LILRB1/IL7R/FCGR2B/HLA-G
GO:0002396	MHC protein complex assembly	5/2341	5	BP	7/17910	0.000634371	0.00736853	HLA-DRA/HLA-DMB/HLA-DRB1/HLA-DMA/TAPBPL
GO:0002826	negative regulation of T-helper 1 type immune response	5/2341	5	BP	7/17910	0.000634371	0.00736853	HAVCR2/XCL1/IL33/JAK3/TNFSF4
GO:0070383	DNA cytosine deamination	5/2341	5	BP	7/17910	0.000634371	0.00736853	APOBEC3G/APOBEC3D/APOBEC3A/APOBEC3F/APOBEC3H
GO:1904124	microglial cell migration	5/2341	5	BP	7/17910	0.000634371	0.00736853	P2RY12/STAP1/CSF1/CCL3/CX3CR1
GO:1904139	regulation of microglial cell migration	5/2341	5	BP	7/17910	0.000634371	0.00736853	P2RY12/STAP1/CSF1/CCL3/CX3CR1
GO:1904478	regulation of intestinal absorption	5/2341	5	BP	7/17910	0.000634371	0.00736853	APOA1/HAMP/ABCG8/LEP/APOA2
GO:2000669	negative regulation of dendritic cell apoptotic process	5/2341	5	BP	7/17910	0.000634371	0.00736853	LILRB1/CXCL12/CCR7/AXL/CCL19
GO:0002645	positive regulation of tolerance induction	6/2341	6	BP	10/17910	0.00064947	0.00750593	IDO1/CD274/LILRB2/CD3E/FOXJ1/HLA-G
GO:0032823	regulation of natural killer cell differentiation	6/2341	6	BP	10/17910	0.00064947	0.00750593	RASGRP1/IL15/PRDM1/ZNF683/TOX/AXL
GO:0045351	type I interferon biosynthetic process	6/2341	6	BP	10/17910	0.00064947	0.00750593	NMI/TLR8/TLR7/TLR3/TLR4/IL10
GO:0010522	regulation of calcium ion transport into cytosol	25/2341	25	BP	98/17910	0.000649712	0.00750593	CXCL10/CXCL11/CXCL9/SLC8A1/CLIC2/LYN/XCL1/JPH3/P2RY6/PTPN6/CORO1A/EPO/CD4/GPER1/CD19/ADCYAP1R1/PLN/HAP1/GRIN1/JPH4/NOS1/IL13/NTSR1/TRDN/F2
GO:0098562	cytoplasmic side of membrane	32/2436	32	CC	138/18675	0.000745846	0.00750764	AKAP5/PTPN22/PTPRC/CYLD/CD2/RPS28/ATP2C2/SPTA1/PTPN7/GNGT2/STAC3/LRRK2/RASAL3/AJAP1/JUP/HCK/CDIP1/DSG1/PALM/EEF1A2/TGM3/CARMIL2/KCNAB2/STAC2/KIT/CNR2/GNG13/ESYT3/TH/SNAP25/ALOX15/NTSR1
GO:0006953	acute-phase response	15/2341	15	BP	47/17910	0.000653313	0.00753734	APOL2/CD163/TNF/EPO/TFR2/SERPINA1/TNFSF11/ASS1/HAMP/CNR1/IL1B/SAA2/SAA1/F2/MBL2
GO:0005768	endosome	143/2436	143	CC	852/18675	0.000772705	0.00769346	CD274/DTX3L/B2M/CCR5/TLR8/CTSS/FCGR1B/TLR7/SLA/MARCHF1/HLA-B/HLA-DOA/IL15RA/TLR3/JAK2/HLA-DRA/PRF1/HAVCR2/SNX20/FCGR1A/HLA-F/HLA-C/CD8B/VCAM1/CYTIP/SLA2/TLR4/RHOV/HLA-DMB/HLA-E/IL2RB/HLA-DPA1/UBA52/IL15/SLC9A9/HLA-DRB1/FGD2/IL12B/RAB8B/HLA-DQA2/KIR2DL4/CD1D/HLA-DPB1/HLA-DOB/MRC1/HLA-DQA1/TMEM184A/ANKRD13B/TNF/LRRK2/CD74/CST7/ACAP1/SLC39A4/TMEM150B/LAMP3/HLA-DQB1/HLA-DMA/IL2RG/TICAM2/CDIP1/HLA-DRB…
GO:0051051	negative regulation of transport	91/2341	91	BP	502/17910	0.000671721	0.00773928	GBP1/PTPN22/TRAT1/RSAD2/SRGN/PTGER4/LILRB1/TLR8/CCR2/CD84/SP100/P2RY12/CLIC2/PROM2/LILRB2/HLA-F/CD200R1/TLR2/BANK1/FFAR4/ANKRD13B/TNF/TMSB4X/LRRK2/CBARP/NECAB2/RAB23/CD74/NLRP3/TIFAB/NLRP7/IL33/TLR6/CNIH2/PRKCB/CD33/DERL3/TNFRSF1B/FERMT1/CD300A/CORO1A/EPO/ASIC1/VSNL1/CD300LF/KCNE1/CRHR1/SH3GL3/CARD17/FABP5/GHRL/FZD9/TCAF2/BST2/LGALS9/FCGR2B/LRRTM2/NOS3/DMTN/BOK/APOA1/KCNH2/LILRA5/PCSK9/PACSIN1/IL…
GO:0042095	interferon-gamma biosynthetic process	8/2341	8	BP	17/17910	0.000682189	0.00784931	LILRB1/TLR8/TLR7/TLR3/IL27/EBI3/IL12B/IL18
GO:0050704	regulation of interleukin-1 secretion	16/2341	16	BP	52/17910	0.000687822	0.00790349	TLR8/TLR4/AIM2/NLRP3/NLRP7/NOD2/CCL3/CARD17/LILRA2/LGALS9/APOA1/LILRA5/CCR7/SAA1/CCL19/IGHD
GO:0023026	MHC class II protein complex binding	8/2173	8	MF	16/16967	0.00035348	0.0080251	HLA-DOA/HLA-DRA/HLA-DMB/HLA-DRB1/HLA-DOB/CD74/MS4A1/HLA-DMA
GO:0042288	MHC class I protein binding	8/2173	8	MF	16/16967	0.00035348	0.0080251	LILRB1/CD8A/LILRB2/CD8B/HLA-E/CD244/KLRK1/KLRC4-KLRK1
GO:0050664	oxidoreductase activity, acting on NAD(P)H, oxygen as acceptor	8/2173	8	MF	16/16967	0.00035348	0.0080251	CYBB/KMO/DUOX1/NCF2/NCF1B/NCF1/NCF1C/DUOX2
GO:0051272	positive regulation of cellular component movement	99/2341	99	BP	555/17910	0.000703912	0.00807751	CXCL10/CD274/IFNG/PTPRC/CCL8/CCL5/SOD2/CCL4/CCR2/CXCL13/JAK2/SLC8A1/P2RY12/LYN/NSMF/AIF1/FPR2/DOCK8/NCKAP1L/S100A14/RAB25/CASS4/RPS19/SEMA4D/CCR1/TNFSF14/S100A7/C3AR1/XCL1/CMKLR1/GPI/TNF/TMSB4X/CSF1R/CD74/P2RY6/CSF1/SPN/DUOX1/FAM83H/DEFB1/CCL7/ZNF703/HSPB1/LGMN/PTAFR/TNFSF18/CORO1A/SPOCK2/WNT11/GRB7/FGF1/CCL3/F10/FGFBP1/FAM110C/GPER1/CCBE1/RHOD/TCAF2/RAC2/SERPINB3/EDN3/CCR6/LGALS9/INSL3/F7/CXCL12…
GO:0050856	regulation of T cell receptor signaling pathway	13/2341	13	BP	38/17910	0.000705875	0.00808917	GBP1/PTPN22/TRAT1/CYLD/CD226/TESPA1/RPS3/LCK/CD160/LILRB4/CD300A/PTPN6/CCR7
GO:0045408	regulation of interleukin-6 biosynthetic process	10/2341	10	BP	25/17910	0.000718596	0.00821293	TLR1/TNF/INPP5D/TLR6/PTAFR/TYROBP/GHRL/EREG/FOXJ1/IL1B
GO:0045672	positive regulation of osteoclast differentiation	10/2341	10	BP	25/17910	0.000718596	0.00821293	IFNG/CCR1/IL12B/TNF/CSF1/TYROBP/IL23R/TNFSF11/POU4F1/IL20
GO:0042493	response to drug	159/2341	159	BP	958/17910	0.000724612	0.00827064	STAT1/PTPN22/B2M/CYBB/CD69/IPCEF1/GRIN3A/CD38/ACOD1/IL18RAP/TLR3/SLC8A1/P2RY12/LYN/AIF1/XRN1/VCAM1/NCKAP1L/RPL18A/EEF2/TLR2/CD27/RPS3/GAL/HSD11B2/LCK/PTGER2/AIM2/EIF4EBP1/SLC19A1/TNF/DBH/ENDOG/PEMT/S100A8/LRRK2/SLC1A6/SLAMF8/AGPAT2/JUP/ARG1/ID1/LTA/CCL7/CLDN4/PTAFR/SLC6A11/EPO/ASIC1/DSG1/ABCC6/MAP4K1/MGST1/GSTP1/AQP5/HBQ1/CYP1B1/ABCB1/NOD2/ALDH3A1/CDH3/FABP3/CIB2/PPP1R14A/WFDC1/ADCY8/GHRL/CHRNA6/…
GO:0008289	lipid binding	112/2173	112	MF	643/16967	0.000372095	0.00831775	APOL1/FYB1/DAPP1/PLEK/RASGRP1/LYN/APOL2/BIN2/PROM2/SNX20/TLR4/NME4/RUFY4/ARHGAP9/JCHAIN/BTK/TLR2/EPN3/FGD2/SULT2B1/ARAP2/CD1D/HSD11B2/STAP1/GPR183/FFAR4/CGAS/PEMT/S100A8/GPAA1/BPIFC/S100A9/PPARD/TULP1/RNASE7/CRABP1/CYTH4/CD6/CRABP2/TLR6/SPTBN2/SELL/STARD10/PTAFR/ADAP2/HSD17B1/CD300A/ANXA8/CD300LF/RTN4R/GRB7/ITPR1/NCF4/APOB/SH3GL3/SYTL3/MYO1G/PRR7/SDCBP2/IRX5/FABP3/F10/FABP5/RASGRP2/MTTP/ESR1/BAIA…
GO:0051092	positive regulation of NF-kappaB transcription factor activity	34/2341	34	BP	149/17910	0.000730206	0.00832337	TRIM22/IL18RAP/TLR3/NLRC4/TLR4/UBA52/BTK/TLR2/RPS3/AIM2/TRIM14/TNF/PRKCQ/S100A8/S100A9/NLRP3/PRKCH/CARD11/TLR6/IL18/PRKCB/TNFSF18/IL18R1/ITGB2/IRAK2/NOD2/S100A12/LGALS9/CD40LG/TNFSF11/CX3CR1/ADAM8/IL1B/AGT
GO:0042454	ribonucleoside catabolic process	9/2341	9	BP	21/17910	0.000732032	0.00833308	APOBEC3G/APOBEC3D/CDA/ADA2/APOBEC3A/APOBEC3F/AICDA/APOBEC3H/ENPP4
GO:0051960	regulation of nervous system development	146/2341	146	BP	870/17910	0.000740631	0.00841975	B2M/CD38/CCR2/P2RY12/LYN/EFNA3/NSMF/NEUROG3/CPEB3/TLR2/SEMA4D/NECTIN1/DUOXA1/STAP1/GPR183/SF3A2/TNF/LRRK2/KLK8/KNDC1/CST7/S100A9/RAC3/NCS1/PRKCH/DBN1/CSF1/ID1/CRABP2/LRFN1/LTA/LRFN4/SHANK1/DCC/IRX3/C1QA/TNFRSF1B/DLX2/EPO/ASCL2/RTN4R/KLK6/WNT3A/PTPRO/ARC/ZNF804A/SH3GL3/GRHL3/CCL3/PTK7/GFI1/GHRL/GPER1/PTK6/NGEF/NOTCH3/BRINP1/ADGRB2/CHRNA3/BCL11B/RASSF10/OLFM1/RTN4RL2/CXCL12/LRRTM2/NFATC4/BRSK2/CXCR…
GO:0045165	cell fate commitment	49/2341	49	BP	238/17910	0.000749598	0.00851037	CYLD/TBX21/MIAT/SLAMF6/IL7/IL12RB1/IL12B/PITX1/JAG2/SLAMF8/SPN/ETV2/DLX2/TEAD3/LY9/WNT3A/HOXA11/EOMES/NOTCH3/BCL11B/IL23R/TBX1/FGFR2/CHD5/SH3PXD2B/NTF4/DMRTA2/GSC/DLX1/IHH/WNT1/FEV/NKX2-2/LBX1/ARX/GATA3/HOXA2/ONECUT2/RORC/WNT7A/FOXA1/FOXN4/POU4F1/NKX2-5/MYT1L/PAX2/SOSTDC1/TLX3/NR2E1
GO:1903531	negative regulation of secretion by cell	43/2341	43	BP	202/17910	0.000757053	0.00857684	GBP1/PTPN22/RSAD2/SRGN/PTGER4/LILRB1/TLR8/CCR2/CD84/P2RY12/HLA-F/CD200R1/BANK1/FFAR4/TNF/TMSB4X/CBARP/NLRP3/NLRP7/IL33/TLR6/TNFRSF1B/CD300A/ASIC1/VSNL1/CARD17/GHRL/LGALS9/FCGR2B/APOA1/LILRA5/IL36RN/CRHBP/GRM7/IL10/CNR1/IL1B/ADRA2C/CIDEA/IL11/LIF/LEP/APOA2
GO:0051048	negative regulation of secretion	47/2341	47	BP	226/17910	0.000757459	0.00857684	GBP1/PTPN22/RSAD2/SRGN/PTGER4/LILRB1/TLR8/CCR2/CD84/P2RY12/HLA-F/CD200R1/BANK1/FFAR4/TNF/TMSB4X/CBARP/CD74/NLRP3/TIFAB/NLRP7/IL33/TLR6/TNFRSF1B/CD300A/ASIC1/VSNL1/CARD17/GHRL/LGALS9/FCGR2B/APOA1/LILRA5/IL36RN/CRHBP/GRM7/IL10/NMU/CNR1/IL1B/ADRA2C/CIDEA/OXT/IL11/LIF/LEP/APOA2
GO:0046718	viral entry into host cell	29/2341	29	BP	121/17910	0.000761068	0.00860632	CD80/CCR5/CD86/SLAMF1/HAVCR1/TRIM21/NECTIN1/IFITM1/MRC1/CR1/NECTIN4/CD74/FCN1/GPR15/ITGB7/CD4/SELPLG/SERPINB3/LGALS9/CXCR4/CD209/ITGB6/CLDN6/CLEC5A/EFNB3/AXL/PTX3/MOG/CR2
GO:0005504	fatty acid binding	11/2173	11	MF	28/16967	0.000392757	0.00864661	FFAR4/S100A8/S100A9/PPARD/PRR7/FABP3/FABP5/ALB/ALOX5AP/HNF4A/PMP2
GO:0010950	positive regulation of endopeptidase activity	36/2341	36	BP	161/17910	0.000773081	0.0087306	FASLG/TNFSF10/JAK2/LYN/EFNA3/NLRC4/RPS3/LCK/AIM2/TNF/CR1/S100A8/NDUFA13/FAS/S100A9/NLRP3/LGMN/TNFSF15/WNT3A/PRR7/MEFV/COL4A3/GPER1/SERPINB3/LGALS9/P2RX1/EPHA4/BOK/TTBK1/XDH/ST18/FOXL2/PERP/GRIN1/BCL2L10/NGFR
GO:0001848	complement binding	9/2173	9	MF	20/16967	0.000404901	0.00878091	CFB/CR1/VSIG4/ITGB2/ITGAM/C4B/C4A/PTX3/CR2
GO:0097028	dendritic cell differentiation	14/2341	14	BP	43/17910	0.000784093	0.00883163	UBD/LILRB1/BATF2/LYN/LILRB2/FLT3/TMEM176B/LGALS9/FCGR2B/CCR7/HLA-G/AXL/PRTN3/CCL19
GO:1904407	positive regulation of nitric oxide metabolic process	14/2341	14	BP	43/17910	0.000784093	0.00883163	IFNG/JAK2/AIF1/TLR4/TNF/KLRK1/TLR6/ITGB2/ASS1/IL1B/KLRC4-KLRK1/PTX3/HBB/AGT
GO:0051279	regulation of release of sequestered calcium ion into cytosol	21/2341	21	BP	78/17910	0.000805137	0.00905673	CXCL10/CXCL11/CXCL9/SLC8A1/CLIC2/LYN/XCL1/JPH3/P2RY6/PTPN6/CORO1A/GPER1/CD19/PLN/HAP1/JPH4/NOS1/IL13/NTSR1/TRDN/F2
GO:0034142	toll-like receptor 4 signaling pathway	12/2341	12	BP	34/17910	0.000818862	0.00919902	PTPN22/TNIP3/ACOD1/PIK3AP1/LYN/TLR4/S100A14/TICAM2/ITGB2/ITGAM/LILRA2/BPIFB1
GO:0034762	regulation of transmembrane transport	96/2341	96	BP	538/17910	0.000831651	0.00933042	CXCL10/CXCL11/CXCL9/IFNG/CYBB/CTSS/CCR2/SLC8A1/CLIC2/PIK3CG/LYN/GLRX/GAL/FFAR4/XCL1/JPH3/TNF/STAC3/CLIC5/TMSB4X/CBARP/P2RY6/CCL2/SCN5A/CNIH2/SHANK1/PRKCB/PTAFR/PTPN6/CORO1A/EPO/C1QTNF12/KCNE1/CACNA1H/KCNA3/CRHR1/KCNQ2/KCNK7/ABCB1/KCNU1/KCNIP3/PLCG2/FABP5/CHCHD10/GPER1/SLC2A1/CACNA1G/TCAF2/TPCN2/SLC34A1/EDN3/CACNA2D2/KCNH2/CD19/KCNC1/PCSK9/KCNAB2/CRHBP/GPC3/STAC2/CFTR/KCNG4/KCNMA1/HCN2/PLN/KCNJ1/C…
GO:0034656	nucleobase-containing small molecule catabolic process	15/2341	15	BP	48/17910	0.000836852	0.00937647	APOBEC3G/DPYD/APOBEC3D/NT5M/NUDT1/CDA/ADA2/APOBEC3A/APOBEC3F/ENTPD2/AICDA/APOBEC3H/ENTPD8/ENPP4/ENTPD3
GO:0048562	embryonic organ morphogenesis	55/2341	55	BP	276/17910	0.000841682	0.00941825	USH1G/MYO7A/RDH10/TIFAB/DLX2/WNT11/GRHL2/WNT3A/GRHL3/DLX5/IRX5/PTK7/MFAP2/HOXA11/FRZB/OTX1/OVOL2/TBX1/FGFR2/NDRG4/ATP6V1B1/SOX11/CHRNA9/HMX2/FBN2/FOXH1/GSC/RIPOR2/FOXL2/IHH/WNT1/DLX6/LBX1/FOXE1/FOXF2/GBX2/MDFI/TCF21/ATP8A2/GATA3/HOXA2/KCNQ4/PAX5/RBPMS2/TH/GJB6/OSR1/FOXN4/RBP4/NKX2-5/HAND2/FOLR1/PAX2/BMP7/MYO3A
GO:0048468	cell development	303/2341	303	BP	1971/17910	0.000900293	0.0100609	GBP1/B2M/PTPRC/FASLG/LILRB1/GRIN3A/CD38/CCR2/JAK2/SLC8A1/P2RY12/LYN/EVI2B/EFNA3/NSMF/NEUROG3/SFN/FPR2/FLI1/TLR4/NCKAP1L/SLFN14/RAB25/IL15/CASS4/CPEB3/BTK/RPS19/TLR2/KRT2/SEMA4D/NECTIN1/PRDM1/GAL/SPTA1/DUOXA1/TACSTD2/STAP1/CAMSAP3/KBTBD8/IGSF9/GPR183/SF3A2/USH1G/TPRN/TNF/PRKCQ/STAC3/MYO7A/S100A8/LRRK2/CSF1R/KLK8/KNDC1/SLAMF8/RDH10/S100A9/PAK4/PPP1R16B/LST1/SOX15/RAC3/NCS1/TULP1/PRKCH/DBN1/PAEP/MEI…
GO:0050806	positive regulation of synaptic transmission	33/2341	33	BP	145/17910	0.000909541	0.010151	CCR2/LILRB2/TNF/KMO/CCL2/SHANK1/LGMN/TYROBP/ARC/ADCY8/BAIAP3/GPER1/SLC1A3/LRRTM2/NFATC4/EPHA4/CX3CR1/SHANK2/CUX2/SLC8A2/HAP1/GRIN1/CNR1/IGSF9B/OXT/SYT9/CHRNB2/WNT7A/SNAP25/NRXN1/NTSR1/RIMS2/NR2E1
GO:0046658	anchored component of plasma membrane	15/2436	15	CC	49/18675	0.00104054	0.0102487	CD2/LYPD3/CD160/CA4/RTN4R/RTN4RL2/GPC2/GP1BA/GPC3/RHBG/CNTN6/RGS7BP/NTNG1/GPC5/FOLR1
GO:0051090	regulation of DNA-binding transcription factor activity	79/2341	79	BP	429/17910	0.000924286	0.0102907	TRIM22/CYLD/NLRC5/DDX58/ACOD1/NLRC3/IL18RAP/TLR3/JAK2/SP100/HAVCR2/NLRC4/NEUROG3/TRIM21/TLR4/UBA52/BTK/TLR2/TRIM34/RPS3/HCLS1/AIM2/XCL1/CMKLR1/TRIM14/TONSL/TNF/PRKCQ/TMSB4X/S100A8/S100A9/NLRP3/JUP/HCK/PRKCH/CARD11/ID1/TLR6/IL18/PRKCB/TNFSF18/IL18R1/TNFSF4/ITGB2/IRAK2/WNT3A/CYP1B1/NOD2/ADCY8/GFI1/ZIC2/EOMES/ESR1/FOXJ1/S100A12/LGALS9/CD40LG/TNFSF11/NFAM1/CX3CR1/ADAM8/FOXH1/CYTL1/WNT10B/KIT/IL10/MSX…
GO:0010562	positive regulation of phosphorus metabolic process	168/2341	168	BP	1025/17910	0.000925666	0.0102907	PARP14/PARP9/IFNG/PTPN22/PTPRC/CD80/CCL5/PLEK/RASGRP1/FCRL3/SLAMF1/TLR3/JAK2/P2RY12/PIK3CG/LYN/PROM2/HAVCR2/NSMF/LILRB2/AIF1/FCGR1A/ALOX12B/FPR2/TLR4/NCKAP1L/UBA52/MLKL/SCIMP/IL15/CASS4/CD27/SEMA4D/MLST8/FGD2/CCR1/BANK1/IL12B/RPS3/CD244/HCLS1/STAP1/GPR183/FLT3/FFAR4/LCP2/S100A7/SEMA4C/TNF/TMSB4X/MTCO2P12/LRRK2/CSF1R/NECAB2/KNDC1/CD74/FAS/PPP1R16B/P2RY6/CSF1/SOCS1/CRLF1/TLR6/IL18/IFNL1/CD33/PRR5/P…
GO:0045937	positive regulation of phosphate metabolic process	168/2341	168	BP	1025/17910	0.000925666	0.0102907	PARP14/PARP9/IFNG/PTPN22/PTPRC/CD80/CCL5/PLEK/RASGRP1/FCRL3/SLAMF1/TLR3/JAK2/P2RY12/PIK3CG/LYN/PROM2/HAVCR2/NSMF/LILRB2/AIF1/FCGR1A/ALOX12B/FPR2/TLR4/NCKAP1L/UBA52/MLKL/SCIMP/IL15/CASS4/CD27/SEMA4D/MLST8/FGD2/CCR1/BANK1/IL12B/RPS3/CD244/HCLS1/STAP1/GPR183/FLT3/FFAR4/LCP2/S100A7/SEMA4C/TNF/TMSB4X/MTCO2P12/LRRK2/CSF1R/NECAB2/KNDC1/CD74/FAS/PPP1R16B/P2RY6/CSF1/SOCS1/CRLF1/TLR6/IL18/IFNL1/CD33/PRR5/P…
GO:0010951	negative regulation of endopeptidase activity	44/2341	44	BP	210/17910	0.000933861	0.0103683	TNFAIP8/SLPI/NAIP/SFN/PI3/CD27/TNFSF14/CR1/SPINK5/A2ML1/CST6/CST7/LAMP3/NLRP7/SPOCK2/ANXA8/IFI6/CARD17/COL4A3/WFDC1/CPAMD8/CSTB/C4B/SERPINB3/BST2/CSTA/HMSD/WFDC2/SERPINB9/SERPINB13/C3/CST2/SPINT1/PCSK1N/WFIKKN2/TFAP2B/C4A/LCN1/SPINK1/MMP9/ITIH5/AMBP/NGFR/PAX2
GO:0014066	regulation of phosphatidylinositol 3-kinase signaling	28/2341	28	BP	117/17910	0.000952679	0.0104893	CCL5/NLRC3/RASGRP1/JAK2/PIK3CG/PIK3AP1/LYN/CD28/SEMA4D/HCLS1/FLT3/TNF/PPP1R16B/PPARD/IL18/PRR5/PTPN6/EPO/HCST/GPER1/SERPINA12/PIK3R5/NCF1/KIT/MYOC/LEP/AGT/F2
GO:0001771	immunological synapse formation	7/2341	7	BP	14/17910	0.000956123	0.0104893	PRF1/HAVCR2/DOCK2/DOCK8/CD6/CCR7/CCL19
GO:0002523	leukocyte migration involved in inflammatory response	7/2341	7	BP	14/17910	0.000956123	0.0104893	S100A8/SLAMF8/S100A9/ITGB2/CCR6/ADAM8/SELE
GO:0044126	regulation of growth of symbiont in host	7/2341	7	BP	14/17910	0.000956123	0.0104893	IRF8/IL12B/TNF/LTA/IL10/CTSG/MBL2
GO:0044146	negative regulation of growth of symbiont involved in interaction with host	7/2341	7	BP	14/17910	0.000956123	0.0104893	IRF8/IL12B/TNF/LTA/IL10/CTSG/MBL2
GO:0046133	pyrimidine ribonucleoside catabolic process	7/2341	7	BP	14/17910	0.000956123	0.0104893	APOBEC3G/APOBEC3D/CDA/APOBEC3A/APOBEC3F/AICDA/APOBEC3H
GO:0050862	positive regulation of T cell receptor signaling pathway	7/2341	7	BP	14/17910	0.000956123	0.0104893	TRAT1/CYLD/CD226/TESPA1/RPS3/LCK/CCR7
GO:0060732	positive regulation of inositol phosphate biosynthetic process	7/2341	7	BP	14/17910	0.000956123	0.0104893	CD244/P2RY6/PTAFR/PTH1R/GPER1/ADCYAP1R1/NTSR1
GO:0060993	kidney morphogenesis	24/2341	24	BP	95/17910	0.000957033	0.0104893	STAT1/GCNT1/TACSTD2/LRRK2/IRX3/WNT11/FGF1/WNT6/HOXA11/FOXJ1/WNT7B/GPC3/WNT1/HOXD11/IRX2/TCF21/GATA3/IRX1/WNT4/LIF/OSR1/AGT/PAX2/BMP7
GO:0061326	renal tubule development	24/2341	24	BP	95/17910	0.000957033	0.0104893	STAT1/TACSTD2/IRX3/WNT11/FGF1/WNT6/HOXA11/LGR5/WNT7B/CD24/GPC3/WNT1/HOXD11/IRX2/TCF21/TFAP2B/GATA3/IRX1/WNT4/LIF/PROM1/OSR1/AGT/PAX2
GO:0042629	mast cell granule	9/2436	9	CC	22/18675	0.00108016	0.0105259	SRGN/RASGRP1/PIK3CG/LYN/BTK/LAT2/MILR1/CXCR2/KIT
GO:0030658	transport vesicle membrane	40/2436	40	CC	188/18675	0.00110303	0.0106355	B2M/HLA-B/HLA-DRA/HLA-F/HLA-C/HLA-E/HLA-DPA1/HLA-DRB1/RAB3A/HLA-DQA2/HLA-DPB1/HLA-DQA1/TMEM184A/SEMA4C/DBH/LRRK2/CBARP/CD74/ECE2/HLA-DQB1/CA4/HLA-DRB5/CNIH2/HLA-H/ITPR1/HLA-DQB2/MAP6/ATP6V1B1/SYT3/SLC30A3/SYN2/SLC6A17/TMEM163/HLA-G/PTPRN/SLC10A4/SYT9/RAB3C/RPH3A/FOLR1
GO:0032479	regulation of type I interferon production	29/2341	29	BP	123/17910	0.00100565	0.011008	STAT1/IFIH1/IRF1/PTPN22/CYLD/NMI/NLRC5/LILRB1/DDX58/TLR8/ZBP1/TLR7/ACOD1/NLRC3/TLR3/HAVCR2/TRIM21/UBE2L6/UBA7/TLR4/TLR2/CGAS/DHX58/NLRX1/HERC5/ISG15/PLCG2/IL10/NLRP4
GO:0050706	regulation of interleukin-1 beta secretion	14/2341	14	BP	44/17910	0.00101336	0.0110641	TLR8/TLR4/AIM2/NLRP3/NLRP7/NOD2/CCL3/CARD17/LILRA2/LGALS9/APOA1/LILRA5/CCR7/CCL19
GO:0071622	regulation of granulocyte chemotaxis	14/2341	14	BP	44/17910	0.00101336	0.0110641	CCL5/NCKAP1L/S100A14/S100A7/C3AR1/XCL1/CMKLR1/CD74/CSF1/RAC2/CXCR2/RIPOR2/CCR7/CCL19
GO:0030168	platelet activation	34/2341	34	BP	152/17910	0.0010581	0.0115379	PLEK/P2RY12/PIK3CG/LYN/TLR4/VAV1/LCK/LCP2/PRKCQ/PRKCH/HSPB1/PRKCB/PTPN6/ENTPD2/ITPR1/WNT3A/PLCG2/PIK3R6/VAV3/TSPAN32/PIK3R5/CD40LG/P2RX1/NOS3/DMTN/GP1BA/GNA14/CLEC1B/ADRA2C/PF4/HBB/COMP/SAA1/F2
GO:0005788	endoplasmic reticulum lumen	59/2436	59	CC	306/18675	0.00123454	0.0117796	APOL1/B2M/ERAP1/IL27/MGAT4A/EBI3/ERAP2/COL17A1/IL12B/FLT3/CLN6/MZB1/CSF1/SLC27A2/NOTUM/COL26A1/ENAM/WNT3A/APOB/F10/COL4A3/MTTP/WNT6/GHRL/CD4/COL4A6/CHGB/ALB/ARSI/F7/SERPINA1/COL4A4/ADAMTS7/CP/APOA1/WNT7B/ERP27/WNT3/PCSK9/CYP2W1/ARSL/PDIA2/GPC3/ADAMTSL1/WNT1/MXRA8/VGF/COL9A3/C3/P4HA3/C4A/WNT4/COL25A1/COL24A1/WNT7A/CES1/APOA2/TRDN/F2
GO:0030335	positive regulation of cell migration	92/2341	92	BP	516/17910	0.00108279	0.0117859	CXCL10/CD274/IFNG/PTPRC/CCL8/CCL5/SOD2/CCL4/CCR2/CXCL13/JAK2/SLC8A1/P2RY12/LYN/NSMF/AIF1/FPR2/DOCK8/NCKAP1L/S100A14/RAB25/CASS4/SEMA4D/CCR1/TNFSF14/S100A7/C3AR1/XCL1/CMKLR1/GPI/TNF/TMSB4X/CSF1R/CD74/P2RY6/CSF1/SPN/FAM83H/CCL7/ZNF703/HSPB1/LGMN/PTAFR/TNFSF18/CORO1A/WNT11/GRB7/FGF1/CCL3/F10/FGFBP1/FAM110C/GPER1/CCBE1/RHOD/TCAF2/RAC2/SERPINB3/EDN3/CCR6/LGALS9/INSL3/F7/CXCL12/NOS3/CXCR4/DMTN/CARMIL2/…
GO:0002763	positive regulation of myeloid leukocyte differentiation	16/2341	16	BP	54/17910	0.00108498	0.0117859	IFNG/EVI2B/CCR1/IL12B/HCLS1/TNF/CD74/CSF1/TYROBP/CD4/IL23R/TNFSF11/PF4/LIF/POU4F1/IL20
GO:0032715	negative regulation of interleukin-6 production	16/2341	16	BP	54/17910	0.00108498	0.0117859	PTPN22/NLRC3/SLAMF1/HAVCR2/CD200R1/TLR4/NCKAP1L/BANK1/TNF/INPP5D/NLRX1/PTPN6/GHRL/FOXJ1/IL36RN/IL10
GO:2001056	positive regulation of cysteine-type endopeptidase activity	31/2341	31	BP	135/17910	0.00109574	0.0118465	FASLG/TNFSF10/JAK2/NLRC4/RPS3/LCK/AIM2/TNF/S100A8/NDUFA13/FAS/S100A9/NLRP3/LGMN/TNFSF15/WNT3A/PRR7/MEFV/COL4A3/GPER1/LGALS9/P2RX1/BOK/TTBK1/XDH/ST18/FOXL2/PERP/GRIN1/BCL2L10/NGFR
GO:0042359	vitamin D metabolic process	9/2341	9	BP	22/17910	0.0010961	0.0118465	IFNG/TNF/LGMN/GFI1/CYP24A1/CYP11A1/SNAI1/IL1B/LRP2
GO:0045624	positive regulation of T-helper cell differentiation	9/2341	9	BP	22/17910	0.0010961	0.0118465	CD80/CD86/IL12RB1/IL12B/NLRP3/IL18/TNFSF4/IL23R/CCL19
GO:0060065	uterus development	9/2341	9	BP	22/17910	0.0010961	0.0118465	HOXA9/HOXA11/ESR1/FOXL2/HOXA10/GATA3/CYP19A1/WNT7A/RBP4
GO:0045622	regulation of T-helper cell differentiation	12/2341	12	BP	35/17910	0.00109947	0.0118529	CD80/CD86/TBX21/IL27/IL12RB1/IL12B/NLRP3/IL18/JAK3/TNFSF4/IL23R/CCL19
GO:0050716	positive regulation of interleukin-1 secretion	12/2341	12	BP	35/17910	0.00109947	0.0118529	TLR8/TLR4/AIM2/NLRP3/NOD2/CCL3/LILRA2/LGALS9/LILRA5/SAA1/CCL19/IGHD
GO:0060205	cytoplasmic vesicle lumen	64/2436	64	CC	338/18675	0.001271	0.0119722	B2M/FASLG/MNDA/SRGN/SLPI/BIN2/LYZ/DOCK2/ARHGAP9/CTSW/EEF2/IMPDH2/DPP7/PLAC8/S100A7/GPI/DBH/TMSB4X/S100P/S100A8/APRT/HK3/S100A9/JUP/ARG1/HRNR/FCN1/CDA/ADA2/GMFG/RNASE2/SERPING1/PTPN6/ALOX5/AMPD3/APOB/GSTP1/MIF/FABP5/SELENOP/GHRL/CSTB/ALB/HBA2/S100A12/SERPINB3/SERPINA1/MMRN1/APOA1/LCN2/PPBP/F13A1/RNASE3/C3/PRTN3/PTX3/HBA1/PF4/CHI3L1/HBB/GNLY/PCSK1/CTSG/SAA1
GO:0032010	phagolysosome	4/2436	4	CC	5/18675	0.00129394	0.0119722	NCF2/NCF4/NCF1/ADAM8
GO:1990111	spermatoproteasome complex	4/2436	4	CC	5/18675	0.00129394	0.0119722	PSMB9/PSMB8/PSMB10/PSMA8
GO:0042289	MHC class II protein binding	5/2173	5	MF	7/16967	0.000575571	0.0120456	KRT17/FCRL6/LAG3/CD74/CD4
GO:0019864	IgG binding	6/2173	6	MF	10/16967	0.000580311	0.0120456	FCGR3A/FCGR1B/FCGR1A/FCGR2B/FCGR3B/FCGR2C
GO:0045236	CXCR chemokine receptor binding	6/2173	6	MF	10/16967	0.000580311	0.0120456	CXCL10/CXCL11/CXCL9/CXCL13/CXCL12/PF4
GO:0009898	cytoplasmic side of plasma membrane	27/2436	27	CC	114/18675	0.00133285	0.0122089	AKAP5/PTPN22/PTPRC/CYLD/CD2/ATP2C2/SPTA1/PTPN7/GNGT2/STAC3/AJAP1/JUP/HCK/DSG1/PALM/TGM3/CARMIL2/KCNAB2/STAC2/KIT/CNR2/GNG13/ESYT3/TH/SNAP25/ALOX15/NTSR1
GO:0050886	endocrine process	21/2341	21	BP	80/17910	0.00114846	0.0123655	RAB8B/GAL/HSD11B2/SUCNR1/CRHR1/GHRL/EDN3/RASL10B/NOS3/REN/EDN2/CRHBP/FOXL2/IL1B/HCAR2/GATA3/LEP/CES1/CTSG/AGT/CMA1
GO:0023014	signal transduction by protein phosphorylation	147/2341	147	BP	886/17910	0.00115125	0.0123799	GBP1/PTPN22/PTPRC/CYLD/CCR5/PTGER4/CCL5/LAX1/RASGRP1/FCRL3/SLAMF1/IL2RA/TLR3/JAK2/PIK3CG/PSMB9/LYN/HAVCR2/CSF2RB/ALOX12B/FPR2/TLR4/IL2RB/PSMB8/UBA52/PIK3R2/MLKL/SCIMP/PSME2/CD27/FGD2/CCR1/BANK1/RPS3/SPTA1/CBLC/GPR183/FLT3/FFAR4/S100A7/SEMA4C/TNF/LRRK2/CSF1R/NECAB2/CD74/FAS/RASAL3/PSMB10/P2RY6/IL2RG/ID1/TLR6/CCL2/SPTBN2/IL18/JAK3/CD300A/PTPN6/EPO/FGFR3/FGF1/IRAK2/DUSP9/MAP4K1/GSTP1/MIF/NOD2/CCL3/F…
GO:0031983	vesicle lumen	64/2436	64	CC	339/18675	0.00137162	0.0124397	B2M/FASLG/MNDA/SRGN/SLPI/BIN2/LYZ/DOCK2/ARHGAP9/CTSW/EEF2/IMPDH2/DPP7/PLAC8/S100A7/GPI/DBH/TMSB4X/S100P/S100A8/APRT/HK3/S100A9/JUP/ARG1/HRNR/FCN1/CDA/ADA2/GMFG/RNASE2/SERPING1/PTPN6/ALOX5/AMPD3/APOB/GSTP1/MIF/FABP5/SELENOP/GHRL/CSTB/ALB/HBA2/S100A12/SERPINB3/SERPINA1/MMRN1/APOA1/LCN2/PPBP/F13A1/RNASE3/C3/PRTN3/PTX3/HBA1/PF4/CHI3L1/HBB/GNLY/PCSK1/CTSG/SAA1
GO:0098662	inorganic cation transmembrane transport	111/2341	111	BP	643/17910	0.00116067	0.0124656	CXCL10/CXCL11/CXCL9/PTPRC/FASLG/CCR5/GRIN3A/SLC8A1/P2RY12/CLIC2/PIK3CG/LYN/ATP5F1D/SLC9A9/SLC12A3/GLRX/MFSD3/ATP2C2/GAL/SLC40A1/LCK/SLC15A1/XCL1/JPH3/STAC3/TMSB4X/MTCO2P12/CBARP/SCNN1A/NCS1/P2RY6/SCN5A/ABCB11/NDUFA4L2/SLC31A2/COX4I2/MCUB/PTPN6/CORO1A/ASIC1/KCNE1/ITPR1/CACNA1H/WNT3A/CRHR1/KCNQ2/KCNU1/CCL3/KCNIP3/PLCG2/PKD1L3/BHLHA15/CHCHD10/GPER1/TTYH1/SLC4A11/CACNA1G/TPCN2/SCNN1G/SLC34A1/SLC1A3/E…
GO:0009914	hormone transport	60/2341	60	BP	311/17910	0.00116399	0.0124855	IFNG/CD38/CCL5/JAK2/LYN/BTK/RAB8B/GAL/TNF/CPLX1/CRYM/PPARD/SLCO4A1/C1QTNF12/VSNL1/LTBP4/ITPR1/CRHR1/ADCY8/GHRL/MAFA/BAIAP3/GPER1/SLC2A1/TFR2/CHRNA3/EDN3/RASL10B/BRSK2/TNFSF11/CACNA2D2/SOX11/REN/CRHBP/FAM3B/HNF4A/FOXL2/CFTR/NMU/VGF/PTPRN/NOS2/CNR1/IL1B/ADRA2C/HCAR2/TFAP2B/GATA3/SYT9/IL11/LIF/CYP19A1/MYRIP/BLK/SNAP25/RBP4/LEP/GCK/AGT/RIMS2
GO:0040017	positive regulation of locomotion	100/2341	100	BP	570/17910	0.00116944	0.0125244	CXCL10/CD274/IFNG/PTPRC/CCL8/CCL5/SOD2/CCL4/CCR2/CXCL13/JAK2/SLC8A1/P2RY12/LYN/NSMF/AIF1/FPR2/DOCK8/NCKAP1L/S100A14/RAB25/CASS4/CCR4/SEMA4D/CCR1/TNFSF14/S100A7/C3AR1/XCL1/CMKLR1/GPI/TNF/TMSB4X/CSF1R/CD74/P2RY6/CSF1/SPN/DUOX1/FAM83H/DEFB1/CCL7/ZNF703/HSPB1/SUCNR1/LGMN/PTAFR/TNFSF18/CORO1A/SPOCK2/WNT11/GRB7/FGF1/CCL3/F10/FGFBP1/FAM110C/GPER1/CCBE1/RHOD/TCAF2/RAC2/SERPINB3/EDN3/CCR6/LGALS9/INSL3/F7/…
GO:0055085	transmembrane transport	230/2341	230	BP	1462/17910	0.00117055	0.0125244	CXCL10/CXCL11/APOL1/CXCL9/IFNG/PTPRC/ABCD2/CYBB/FASLG/CCR5/GRIN3A/CTSS/CCR2/SLC8A1/P2RY12/CLIC2/PIK3CG/PSMB9/LYN/PRF1/PSMB8/UBA52/ATP5F1D/SLC9A9/CLCA2/PSME2/SLC12A3/ABCA12/GLRX/MFSD3/ATP2C2/GAL/TTYH3/SLC40A1/LCK/FFAR4/SLC15A1/SLC19A1/XCL1/JPH3/TNF/STAC3/FLVCR2/CLIC5/TMSB4X/MTCO2P12/CBARP/SLC1A6/NDUFA13/ATP12A/SLC7A7/SCNN1A/SLC2A5/PSMB10/NCS1/ABCG4/PPARD/ABCA4/P2RY6/SLC25A10/ANO7/CCL2/SCN5A/SLCO4A…
GO:0098936	intrinsic component of postsynaptic membrane	28/2436	28	CC	120/18675	0.00139802	0.0125548	SLC8A1/LRFN1/LRFN4/CNIH2/DCC/SLC6A11/KCNA3/PTPRO/CHRNA6/GABRA5/GABRD/GRID1/LRRTM2/P2RX1/EPHA4/CHRNA9/KCNC1/FXYD6/EFNB3/GRIN1/ADRA2C/SLC6A3/CDH10/PLPPR4/RGS7BP/CACNG4/CHRNB2/CHRM1
GO:0016814	hydrolase activity, acting on carbon-nitrogen (but not peptide) bonds, in cyclic amidines	9/2173	9	MF	21/16967	0.000628444	0.012861	GCH1/ZBP1/APOBEC3G/CDA/ADA2/APOBEC3A/APOBEC3F/AICDA/APOBEC3H
GO:1901224	positive regulation of NIK/NF-kappaB signaling	20/2341	20	BP	75/17910	0.00120736	0.0129022	TLR7/TLR3/HAVCR2/TLR4/TLR2/CD27/TNFSF14/IL12B/RPS3/TNF/TLR6/IL18/IL18R1/PTP4A3/TNFSF15/NOD2/LGALS9/IL1B/CHI3L1/CCL19
GO:0023061	signal release	79/2341	79	BP	433/17910	0.00121549	0.0129728	IFNG/GRIN3A/CD38/CCL5/JAK2/LYN/BTK/RAB8B/RAB3A/GAL/TNF/CPLX1/LRRK2/NCS1/KMO/PPARD/SEPTIN5/PRKCB/C1QTNF12/ASIC1/VSNL1/LTBP4/ITPR1/CRHR1/ADCY8/GHRL/CHRNA6/MAFA/BAIAP3/GPER1/SLC2A1/TFR2/CHRNA3/EDN3/RASL10B/P2RX1/BRSK2/TNFSF11/CACNA2D2/SOX11/APBA2/REN/SYN2/CRHBP/FAM3B/HNF4A/FOXL2/CFTR/NMU/CHRNB4/VGF/HRH3/PTPRN/NOS2/CNR1/IL1B/ADRA2C/HCAR2/TFAP2B/GATA3/SYT9/IL11/LIF/CHRNB2/CYP19A1/RIMS4/WNT7A/MYRIP/BLK…
GO:0019835	cytolysis	13/2341	13	BP	40/17910	0.00121949	0.0129993	APOL1/LILRB1/GZMA/PRF1/GZMH/LYZ/GZMB/KRT6A/PGLYRP4/PF4/C7/PAX2/F2
GO:0043491	protein kinase B signaling	53/2341	53	BP	268/17910	0.00123725	0.0131722	TRAT1/ICOS/CD80/CD86/CCL5/P2RY12/PIK3CG/PIK3AP1/CD28/PIK3R2/BANK1/HCLS1/VAV1/LCK/MC1R/TNF/CCL2/IL18/C1QTNF12/FGFR3/FGF1/CCL3/IL26/F10/FAM110C/ESR1/GPER1/EREG/RAC2/FGF5/PIK3R5/F7/FGFR2/TNFSF11/CX3CR1/ADAM8/CD19/FGFR4/XDH/AKR1C2/MEIS3/KIT/CCR7/HLA-G/AXL/FGF7/IL1B/GATA3/CHI3L1/MYOC/LEP/CCL19/PAX2
GO:1903305	regulation of regulated secretory pathway	31/2341	31	BP	136/17910	0.00124498	0.0132379	GRIN3A/CCR2/CD84/LYN/HLA-F/RAB3A/CPLX1/LRRK2/CBARP/NCS1/SEPTIN5/PRKCB/PTAFR/CD300A/ITGB2/ITGAM/CHRNA6/BAIAP3/RAC2/LGALS9/FCGR2B/P2RX1/PRAM1/APBA2/CNR1/SYT9/CHRNB2/RIMS4/WNT7A/IL13/CHRNA4
GO:0043020	NADPH oxidase complex	5/2436	5	CC	8/18675	0.00149493	0.0132947	CYBB/NOXA1/NCF2/NCF4/NCF1
GO:0051928	positive regulation of calcium ion transport	28/2341	28	BP	119/17910	0.00125797	0.0133467	CXCL10/CXCL11/CXCL9/CCL5/CCL4/CCR1/ATP2C2/XCL1/STAC3/P2RY6/CCL2/CCL3/PLCG2/CD4/LILRA2/GPER1/CXCL12/LILRA5/CD19/ADCYAP1R1/STAC2/HAP1/GRIN1/GRM6/IL13/NTSR1/TRDN/F2
GO:0002604	regulation of dendritic cell antigen processing and presentation	6/2341	6	BP	11/17910	0.00127081	0.0133467	FGL2/CD74/NOD2/FCGR2B/CCR7/CCL19
GO:0002730	regulation of dendritic cell cytokine production	6/2341	6	BP	11/17910	0.00127081	0.0133467	DDX58/TLR3/TLR4/JAK3/NOD2/BST2
GO:0032490	detection of molecule of bacterial origin	6/2341	6	BP	11/17910	0.00127081	0.0133467	TLR4/TLR2/TLR1/TLR6/NOD2/C4B
GO:0033089	positive regulation of T cell differentiation in thymus	6/2341	6	BP	11/17910	0.00127081	0.0133467	RASGRP1/IL7R/TESPA1/VNN1/ADAM8/IHH
GO:0045006	DNA deamination	6/2341	6	BP	11/17910	0.00127081	0.0133467	APOBEC3G/APOBEC3D/EXOSC4/APOBEC3A/APOBEC3F/APOBEC3H
GO:0051132	NK T cell activation	6/2341	6	BP	11/17910	0.00127081	0.0133467	IL15/IL12B/RASAL3/IL18/CD300A/IL23R
GO:0070673	response to interleukin-18	6/2341	6	BP	11/17910	0.00127081	0.0133467	IL18RAP/IL18BP/TICAM2/IL18/IL18R1/ALOX5
GO:0072610	interleukin-12 secretion	6/2341	6	BP	11/17910	0.00127081	0.0133467	LILRB1/TLR8/LGALS9/LILRA5/CCR7/CCL19
GO:2000551	regulation of T-helper 2 cell cytokine production	6/2341	6	BP	11/17910	0.00127081	0.0133467	RSAD2/TBX21/XCL1/NLRP3/ARG1/GATA3
GO:0002675	positive regulation of acute inflammatory response	11/2341	11	BP	31/17910	0.00127573	0.0133818	PIK3CG/HLA-E/BTK/F12/TNF/TNFSF11/ADAM8/CCR7/C3/CNR1/IL1B
GO:0009636	response to toxic substance	89/2341	89	BP	499/17910	0.00127945	0.0133881	STAT1/GCH1/CYBB/IPCEF1/GRIN3A/CCL5/SOD2/CCL4/IL18RAP/SLC8A1/CLIC2/LYN/XRN1/VCAM1/UBA52/EEF2/TLR2/CD27/GPX2/RPS3/EIF4EBP1/TNF/DBH/ENDOG/PEMT/S100A8/LRRK2/S100A9/ARG1/DUOX1/AKR1B10/CCL7/AKR7A3/SLC6A14/ASIC1/MPST/MGST1/GSTP1/HBQ1/CYP1B1/CCL3/GPX3/EPHX1/ALB/HBA2/MGMT/SDC1/CHRNA3/GSTO2/NOS3/CERS1/FGFR2/SLC2A4/ALOX5AP/KCNC1/LCN2/PPP1R1B/ADCYAP1R1/CRHBP/KCNK1/IL10/CNR2/ASS1/KCNMA1/CHRNB4/AXL/HAMP/GRIN1/…
GO:0043410	positive regulation of MAPK cascade	89/2341	89	BP	499/17910	0.00127945	0.0133881	PTPN22/PTPRC/RASGRP1/FCRL3/SLAMF1/TLR3/JAK2/PIK3CG/HAVCR2/ALOX12B/FPR2/TLR4/UBA52/MLKL/SCIMP/CD27/FGD2/CCR1/BANK1/RPS3/GPR183/FLT3/FFAR4/S100A7/SEMA4C/TNF/LRRK2/CSF1R/NECAB2/CD74/P2RY6/TLR6/EPO/FGFR3/FGF1/IRAK2/DUSP9/MAP4K1/MIF/NOD2/CCL3/FPR1/IL26/GHRL/CD4/PIK3R6/GPER1/S100A12/GNG3/EDN3/PIK3R5/LGALS9/FCGR2B/AVPI1/CD40LG/TBX1/FGFR2/NCF1/CXCR4/NDRG4/SHC2/EPHA4/TNFSF11/FZD8/WNT7B/LILRA5/ADAM8/FGFR4/…
GO:0032602	chemokine production	22/2341	22	BP	86/17910	0.00128216	0.0134	TLR7/TLR3/HAVCR2/AIF1/TLR4/IL7/TLR2/TNF/S100A8/CSF1R/CD74/S100A9/IL33/IL18/TNFSF4/GSTP1/MIF/MEFV/LGALS9/IL10/IL1B/TSLP
GO:0002501	peptide antigen assembly with MHC protein complex	4/2341	4	BP	5/17910	0.00130417	0.0134491	HLA-DRA/HLA-DMB/HLA-DMA/TAPBPL
GO:0002925	positive regulation of humoral immune response mediated by circulating immunoglobulin	4/2341	4	BP	5/17910	0.00130417	0.0134491	PTPRC/TNF/LTA/FCER2
GO:0030300	regulation of intestinal cholesterol absorption	4/2341	4	BP	5/17910	0.00130417	0.0134491	APOA1/ABCG8/LEP/APOA2
GO:0042421	norepinephrine biosynthetic process	4/2341	4	BP	5/17910	0.00130417	0.0134491	DBH/GATA3/TH/HAND2
GO:0072047	proximal/distal pattern formation involved in nephron development	4/2341	4	BP	5/17910	0.00130417	0.0134491	IRX3/IRX2/IRX1/OSR1
GO:0072081	specification of nephron tubule identity	4/2341	4	BP	5/17910	0.00130417	0.0134491	IRX3/IRX2/IRX1/OSR1
GO:1903969	regulation of response to macrophage colony-stimulating factor	4/2341	4	BP	5/17910	0.00130417	0.0134491	TLR4/TLR2/STAP1/CSF1
GO:1903972	regulation of cellular response to macrophage colony-stimulating factor stimulus	4/2341	4	BP	5/17910	0.00130417	0.0134491	TLR4/TLR2/STAP1/CSF1
GO:1904729	regulation of intestinal lipid absorption	4/2341	4	BP	5/17910	0.00130417	0.0134491	APOA1/ABCG8/LEP/APOA2
GO:2000554	regulation of T-helper 1 cell cytokine production	4/2341	4	BP	5/17910	0.00130417	0.0134491	XCL1/IL18/IL18R1/IL1B
GO:2000556	positive regulation of T-helper 1 cell cytokine production	4/2341	4	BP	5/17910	0.00130417	0.0134491	XCL1/IL18/IL18R1/IL1B
GO:0099055	integral component of postsynaptic membrane	27/2436	27	CC	115/18675	0.00152938	0.0134703	SLC8A1/LRFN1/LRFN4/CNIH2/DCC/SLC6A11/KCNA3/PTPRO/CHRNA6/GABRA5/GABRD/GRID1/LRRTM2/P2RX1/EPHA4/CHRNA9/KCNC1/FXYD6/EFNB3/GRIN1/ADRA2C/SLC6A3/CDH10/PLPPR4/CACNG4/CHRNB2/CHRM1
GO:0000165	MAPK cascade	146/2341	146	BP	882/17910	0.00131337	0.0135277	GBP1/PTPN22/PTPRC/CYLD/CCR5/PTGER4/CCL5/LAX1/RASGRP1/FCRL3/SLAMF1/IL2RA/TLR3/JAK2/PIK3CG/PSMB9/LYN/HAVCR2/CSF2RB/ALOX12B/FPR2/TLR4/IL2RB/PSMB8/UBA52/PIK3R2/MLKL/SCIMP/PSME2/CD27/FGD2/CCR1/BANK1/RPS3/SPTA1/CBLC/GPR183/FLT3/FFAR4/S100A7/SEMA4C/TNF/LRRK2/CSF1R/NECAB2/CD74/FAS/RASAL3/PSMB10/P2RY6/IL2RG/ID1/TLR6/CCL2/SPTBN2/IL18/JAK3/CD300A/PTPN6/EPO/FGFR3/FGF1/IRAK2/DUSP9/MAP4K1/GSTP1/MIF/NOD2/CCL3/F…
GO:0032606	type I interferon production	29/2341	29	BP	125/17910	0.00131595	0.0135379	STAT1/IFIH1/IRF1/PTPN22/CYLD/NMI/NLRC5/LILRB1/DDX58/TLR8/ZBP1/TLR7/ACOD1/NLRC3/TLR3/HAVCR2/TRIM21/UBE2L6/UBA7/TLR4/TLR2/CGAS/DHX58/NLRX1/HERC5/ISG15/PLCG2/IL10/NLRP4
GO:0002260	lymphocyte homeostasis	17/2341	17	BP	60/17910	0.00133435	0.0136779	GPR174/IL2RA/LYN/TNFSF13B/NCKAP1L/TNFRSF17/DOCK11/TNFSF14/SPTA1/SLC40A1/CD74/SIT1/JAK3/CORO1A/MIF/LGALS9/LMO1
GO:0031640	killing of cells of other organism	17/2341	17	BP	60/17910	0.00133435	0.0136779	APOL1/IFNG/PRF1/LYZ/RPS19/KRT6A/ARG1/PGLYRP4/S100A12/FCER2/NOS2/HAMP/PF4/GNLY/CTSG/F2/MBL2
GO:0044364	disruption of cells of other organism	17/2341	17	BP	60/17910	0.00133435	0.0136779	APOL1/IFNG/PRF1/LYZ/RPS19/KRT6A/ARG1/PGLYRP4/S100A12/FCER2/NOS2/HAMP/PF4/GNLY/CTSG/F2/MBL2
GO:0099024	plasma membrane invagination	15/2341	15	BP	50/17910	0.00133666	0.0136851	MSR1/BIN2/AIF1/FCGR1A/NCKAP1L/ARHGAP25/STAP1/CD300A/ITGB2/ITGAM/FCGR2B/MARCO/C3/ADGRB1/ALOX15
GO:0061844	antimicrobial humoral immune response mediated by antimicrobial peptide	16/2341	16	BP	55/17910	0.00134717	0.0137763	RPS19/KLK5/S100A7/KRT6A/SPINK5/S100A9/RNASE7/KLK7/DEFB1/PGLYRP4/RNASE6/S100A12/RNASE3/PF4/GNLY/F2
GO:0043903	regulation of symbiosis, encompassing mutualism through parasitism	47/2341	47	BP	232/17910	0.00135255	0.0138148	STAT1/RSAD2/CCL8/CCL5/CCL4/IFIT5/APOBEC3G/SLPI/IFIT1/IRF8/OAS1/CD28/TRIM21/POLR2I/OASL/IL12B/IFITM1/APOBEC3D/RESF1/POU2F3/OAS3/KRT6A/TRIM14/TNF/MX1/CD74/LAMP3/ARG1/FCN1/LTA/APOBEC3A/SFTPD/APOBEC3F/APOBEC3H/CCL3/ISG15/CD4/BST2/LGALS9/CXCR4/IL10/FKBP6/IFI27/PTX3/CTSG/CHMP4C/MBL2
GO:0048015	phosphatidylinositol-mediated signaling	35/2341	35	BP	160/17910	0.00136468	0.013922	CCL5/NLRC3/RASGRP1/JAK2/PIK3CG/PIK3AP1/LYN/CD28/PIK3R2/SEMA4D/HCLS1/FLT3/CD160/TNF/CSF1R/PPP1R16B/NCS1/PPARD/IL18/PRR5/PTAFR/PTPN6/EPO/HCST/GPER1/SERPINA12/PIK3R5/NCF1/KIT/GPR143/GATA3/MYOC/LEP/AGT/F2
GO:0043204	perikaryon	29/2436	29	CC	127/18675	0.00165563	0.0144396	CCR2/NSMF/AIF1/DDN/ENDOG/LRRK2/KNDC1/RTN4R/ASTN2/TTLL7/OLFM1/RTN4RL2/EPHA4/RBFOX3/PDE9A/EFNA2/CRHBP/KCNK1/CNR2/ASS1/NEURL1/PTPRN/SLC8A2/GLRA3/ASTN1/TH/CPNE6/PCSK2/NTSR1
GO:0030665	clathrin-coated vesicle membrane	26/2436	26	CC	110/18675	0.00167096	0.0144396	CD3G/FCGR1B/HLA-DRA/FCGR1A/AP1M2/IL7R/HLA-DPA1/HLA-DRB1/CD3D/RAB3A/HLA-DQA2/HLA-DPB1/HLA-DQA1/CD74/REEP6/HLA-DQB1/HLA-DRB5/APOB/ADCY8/CD4/EREG/HLA-DQB2/CD207/CFTR/SYT9/LRP2
GO:0002009	morphogenesis of an epithelium	93/2341	93	BP	527/17910	0.00141839	0.0144527	STAT1/CXCL10/KRT17/PSMB9/FLG2/PSMB8/PSME2/KRT16/ESRP2/TACSTD2/CAMSAP3/KRT6A/JAG2/SEMA4C/TNF/FOXQ1/CSF1R/RDH10/AJAP1/PSMB10/CSF1/NKD1/KDF1/RSPO3/IRX3/WNT11/ASTN2/FGF1/GRHL2/WNT3A/GRHL3/SERPINB5/PTK7/WNT6/HOXA11/FRZB/ESR1/LGR5/KLK14/OVOL2/SULF1/TCF15/TBX4/RASIP1/NFATC4/FGFR2/BRSK2/CXCR4/NDRG4/TGM3/EPHA4/CA9/CARMIL2/SOX11/WNT7B/FOXH1/SNAI1/TP63/CXCR2/GPC3/IL10/IHH/MSX2/WNT1/HOXD11/LBX1/FOXE1/SPINT1/…
GO:0046879	hormone secretion	58/2341	58	BP	301/17910	0.00143334	0.0145876	IFNG/CD38/CCL5/JAK2/LYN/BTK/RAB8B/GAL/TNF/CPLX1/PPARD/C1QTNF12/VSNL1/LTBP4/ITPR1/CRHR1/ADCY8/GHRL/MAFA/BAIAP3/GPER1/SLC2A1/TFR2/CHRNA3/EDN3/RASL10B/BRSK2/TNFSF11/CACNA2D2/SOX11/REN/CRHBP/FAM3B/HNF4A/FOXL2/CFTR/NMU/VGF/PTPRN/NOS2/CNR1/IL1B/ADRA2C/HCAR2/TFAP2B/GATA3/SYT9/IL11/LIF/CYP19A1/MYRIP/BLK/SNAP25/RBP4/LEP/GCK/AGT/RIMS2
GO:0014015	positive regulation of gliogenesis	20/2341	20	BP	76/17910	0.00144064	0.0146445	CCR2/P2RY12/LYN/TLR2/TNF/PRKCH/CSF1/LTA/C1QA/TNFRSF1B/CCL3/CXCR4/TTBK1/NKX2-2/SPINT1/IL1B/ASPA/LIF/LRP2/MAG
GO:0042226	interleukin-6 biosynthetic process	10/2341	10	BP	27/17910	0.00144891	0.0146936	TLR1/TNF/INPP5D/TLR6/PTAFR/TYROBP/GHRL/EREG/FOXJ1/IL1B
GO:1902624	positive regulation of neutrophil migration	10/2341	10	BP	27/17910	0.00144891	0.0146936	NCKAP1L/C3AR1/XCL1/CD74/RAC2/ADAM8/CXCR2/RIPOR2/CCR7/CCL19
GO:0070670	response to interleukin-4	12/2341	12	BP	36/17910	0.00145536	0.0147241	PARP14/RPS2/RUFY4/IMPDH2/MRC1/XCL1/ARG1/IL2RG/JAK3/CORO1A/CD300LF/GATA3
GO:1905521	regulation of macrophage migration	12/2341	12	BP	36/17910	0.00145536	0.0147241	CCL5/P2RY12/CD200R1/STAP1/C3AR1/CMKLR1/SLAMF8/CSF1/MIF/CCL3/CX3CR1/CYP19A1
GO:0010941	regulation of cell death	257/2341	257	BP	1659/17910	0.00146883	0.0148428	STAT1/CXCL10/IDO1/CD274/UBD/IFNG/IFIT3/IFIT2/PTPRC/BIRC3/FASLG/CYLD/MNDA/CCR5/LILRB1/CD3G/BCL2L14/CD38/TNFSF10/CCL5/SOD2/TNFAIP8/GZMA/IKZF3/TLR3/JAK2/SP100/GIMAP8/PIK3CG/LYN/NAIP/EVI2B/NUGGC/NLRC4/NSMF/CD28/AIF1/SFN/HLA-F/CD200R1/DOCK8/TLR4/IL7/NCKAP1L/IL7R/IL2RB/UBA52/PDCD1/BTK/GZMB/CD27/NAT8B/SEMA4D/FGD2/TNFSF14/IL12B/RPS3/GAL/VNN1/HCLS1/STK17B/VAV1/SLC40A1/LCK/FLT3/SLFN11/PLAC8/FFAR4/CD160/CAS…
GO:0007399	nervous system development	335/2341	335	BP	2216/17910	0.00147826	0.0149204	B2M/ABCD2/CASP5/JAKMIP1/GRIN3A/ST8SIA4/CD38/CCR2/JAK2/SLC8A1/P2RY12/LYN/NAIP/EFNA3/NSMF/NEUROG3/AIF1/FPR2/VCAM1/B4GALT2/TLR4/CPEB3/EEF2/TLR2/CCR4/SEMA4D/NECTIN1/PRDM1/SSTR2/SPTA1/RAPGEFL1/DUOXA1/STAP1/CAMSAP3/IGSF9/GPR183/SF3A2/ZNF358/GPSM1/PITX1/USH1G/TPRN/JAG2/SEMA4C/TNF/PRKCQ/MYO7A/S100A8/LRRK2/SPINK5/CSF1R/KLK8/KNDC1/CST7/S100A9/PAFAH1B3/PAK4/LST1/TIFAB/RAC3/NCS1/PPARD/TULP1/PRKCH/DBN1/CSF1/I…
GO:0042476	odontogenesis	29/2341	29	BP	126/17910	0.00150003	0.0149485	BSG/PHEX/NECTIN1/DLX3/JAG2/CSF1/SCN5A/DLX2/AQP5/WNT6/KLK4/SDC1/BCL11B/SLC34A1/TBX1/FGFR2/TNFSF11/AXIN2/TP63/AQP3/DLX1/MSX2/PERP/SP6/OSR1/SLC24A4/HAND2/BMP7/SOSTDC1
GO:0071695	anatomical structure maturation	34/2341	34	BP	155/17910	0.00150806	0.0149485	SLFN14/SEMA4D/GAL/LRRK2/SPINK5/RAC3/RHEX/REC8/C1QA/FERMT1/EPO/FGFR3/IRX5/CDH3/EREG/DAZL/C1QL1/CX3CR1/TFCP2L1/WNT10B/MSX2/WNT1/FEV/C3/EPHA8/GRIN1/GATA3/MMP2/NPPC/FOXA1/MYOC/LEP/HOXB13/PAX2
GO:0002866	positive regulation of acute inflammatory response to antigenic stimulus	5/2341	5	BP	8/17910	0.00150902	0.0149485	HLA-E/BTK/CCR7/C3/CNR1
GO:0019885	antigen processing and presentation of endogenous peptide antigen via MHC class I	5/2341	5	BP	8/17910	0.00150902	0.0149485	B2M/TAP1/ERAP1/TAP2/ERAP2
GO:0032819	positive regulation of natural killer cell proliferation	5/2341	5	BP	8/17910	0.00150902	0.0149485	HLA-E/IL15/IL12B/IL18/IL23R
GO:0033625	positive regulation of integrin activation	5/2341	5	BP	8/17910	0.00150902	0.0149485	PLEK/CXCL13/P2RY12/RASIP1/SKAP1
GO:0038114	interleukin-21-mediated signaling pathway	5/2341	5	BP	8/17910	0.00150902	0.0149485	STAT1/STAT4/IL21R/IL2RG/JAK3
GO:0043380	regulation of memory T cell differentiation	5/2341	5	BP	8/17910	0.00150902	0.0149485	IL12RB1/IL12B/IFNL1/TNFSF4/IL23R
GO:0045350	interferon-beta biosynthetic process	5/2341	5	BP	8/17910	0.00150902	0.0149485	NMI/TLR8/TLR7/TLR3/TLR4
GO:0045357	regulation of interferon-beta biosynthetic process	5/2341	5	BP	8/17910	0.00150902	0.0149485	NMI/TLR8/TLR7/TLR3/TLR4
GO:0045416	positive regulation of interleukin-8 biosynthetic process	5/2341	5	BP	8/17910	0.00150902	0.0149485	TLR8/TLR7/TLR4/TNF/APOA2
GO:0072161	mesenchymal cell differentiation involved in kidney development	5/2341	5	BP	8/17910	0.00150902	0.0149485	STAT1/TCF21/WNT4/OSR1/PAX2
GO:0098756	response to interleukin-21	5/2341	5	BP	8/17910	0.00150902	0.0149485	STAT1/STAT4/IL21R/IL2RG/JAK3
GO:0098757	cellular response to interleukin-21	5/2341	5	BP	8/17910	0.00150902	0.0149485	STAT1/STAT4/IL21R/IL2RG/JAK3
GO:1903961	positive regulation of anion transmembrane transport	5/2341	5	BP	8/17910	0.00150902	0.0149485	PTAFR/ABCB1/SLC34A1/CFTR/AGT
GO:2001012	mesenchymal cell differentiation involved in renal system development	5/2341	5	BP	8/17910	0.00150902	0.0149485	STAT1/TCF21/WNT4/OSR1/PAX2
GO:0005509	calcium ion binding	109/2173	109	MF	635/16967	0.000760075	0.0153387	GCH1/CD69/RASGRP1/SLC8A1/PRF1/S100A2/AIF1/FLG2/S100A14/CLEC6A/CLEC4A/FLG/TENM2/SPTA1/CBLC/AOAH/LCP1/DSC3/CLEC4E/S100A7/C1S/ADGRE1/JAG2/F12/S100P/EGFL7/S100A8/NECAB2/S100A9/CAPNS2/NCS1/HRNR/FBN3/DUOX1/NKD1/CALML5/SELL/SPOCK2/DSG1/VSNL1/ANXA8/LTBP4/PRRG2/MAN1A1/CDH24/ASTN2/DSC1/CALML3/PPEF1/VWCE/KCNIP3/F10/CIB2/DLK1/C1R/SNCB/RASGRP2/BAIAP3/TUBB4A/TTYH1/CCBE1/S100A12/MGMT/CALN1/NOTCH3/SULF1/F7/EFCC1…
GO:0008202	steroid metabolic process	61/2341	61	BP	321/17910	0.00155762	0.0154121	APOL1/IFNG/APOL2/SULT2B1/HSD11B1/GAL/HSD11B2/FDX2/CLN6/TNF/TM7SF2/PPARD/SLC27A2/SLC27A5/ABCB11/LGMN/LHB/HSD17B1/FGF1/LMF1/DKKL1/CACNA1H/APOB/HSD17B2/CEL/CYP1B1/GFI1/CYP24A1/ESR1/AKR1B15/SERPINA12/UGT2B17/CYP11A1/APOA1/TFCP2L1/FGFR4/SNAI1/DHCR7/HSD17B14/PCSK9/AKR1C2/KIT/CFTR/CYP2A6/IL1B/CYP2E1/ACADL/NPC1L1/WNT4/DHRS9/LRP2/RORC/CYP19A1/SULT4A1/LEP/CES1/AGT/APOA2/PRLR/MALRD1/HSD3B2
GO:0042471	ear morphogenesis	27/2341	27	BP	115/17910	0.00157416	0.0155463	USH1G/MYO7A/TIFAB/WNT3A/GRHL3/DLX5/PTK7/FRZB/OTX1/TBX1/FGFR2/ATP6V1B1/CHRNA9/HMX2/GSC/RIPOR2/WNT1/DLX6/GBX2/ATP8A2/GATA3/HOXA2/KCNQ4/GJB6/OSR1/PAX2/MYO3A
GO:0050798	activated T cell proliferation	13/2341	13	BP	41/17910	0.00157481	0.0155463	PDCD1LG2/CD274/BTN3A1/IL2RA/IL12RB1/IL12B/RPS3/ARG1/IL18/EPO/IL23R/LGALS9/CD24
GO:0060284	regulation of cell development	147/2341	147	BP	893/17910	0.0015893	0.0155829	GBP1/B2M/LILRB1/CD38/CCR2/P2RY12/LYN/EFNA3/NSMF/NEUROG3/CASS4/CPEB3/RPS19/TLR2/SEMA4D/GAL/DUOXA1/TACSTD2/STAP1/GPR183/SF3A2/TNF/LRRK2/KLK8/KNDC1/SLAMF8/S100A9/RAC3/NCS1/PRKCH/DBN1/PAEP/CSF1/ID1/CRABP2/LTA/SHANK1/DCC/IRX3/C1QA/TNFRSF1B/DLX2/EPO/ASCL2/TYROBP/RTN4R/KLK6/WNT3A/PTPRO/ARC/ZNF804A/SH3GL3/CCL3/PTK7/GFI1/HOXA11/FRZB/GPER1/PTK6/NGEF/NOTCH3/BRINP1/CHRNA3/BCL11B/RASSF10/OLFM1/RTN4RL2/CXCL12/…
GO:0010819	regulation of T cell chemotaxis	7/2341	7	BP	15/17910	0.00159128	0.0155829	CXCL10/CCL5/CCR2/CXCL13/TNFSF14/S100A7/XCL1
GO:0042535	positive regulation of tumor necrosis factor biosynthetic process	7/2341	7	BP	15/17910	0.00159128	0.0155829	CYBB/CCR2/TLR4/TLR1/SPN/HSPB1/TYROBP
GO:0044144	modulation of growth of symbiont involved in interaction with host	7/2341	7	BP	15/17910	0.00159128	0.0155829	IRF8/IL12B/TNF/LTA/IL10/CTSG/MBL2
GO:0051709	regulation of killing of cells of other organism	7/2341	7	BP	15/17910	0.00159128	0.0155829	IFNG/PRF1/KRT6A/ARG1/PGLYRP4/FCER2/NOS2
GO:0072160	nephron tubule epithelial cell differentiation	7/2341	7	BP	15/17910	0.00159128	0.0155829	STAT1/CD24/GATA3/LIF/PROM1/OSR1/PAX2
GO:2001185	regulation of CD8-positive, alpha-beta T cell activation	7/2341	7	BP	15/17910	0.00159128	0.0155829	CD274/IRF1/LILRB1/NCKAP1L/HLA-E/XCL1/SOCS1
GO:0014065	phosphatidylinositol 3-kinase signaling	31/2341	31	BP	138/17910	0.00159714	0.0156224	CCL5/NLRC3/RASGRP1/JAK2/PIK3CG/PIK3AP1/LYN/CD28/PIK3R2/SEMA4D/HCLS1/FLT3/CD160/TNF/PPP1R16B/PPARD/IL18/PRR5/PTPN6/EPO/HCST/GPER1/SERPINA12/PIK3R5/NCF1/KIT/GATA3/MYOC/LEP/AGT/F2
GO:0001934	positive regulation of protein phosphorylation	149/2341	149	BP	907/17910	0.00161045	0.0157346	PARP14/PARP9/IFNG/PTPN22/PTPRC/CD80/CCL5/RASGRP1/FCRL3/SLAMF1/TLR3/JAK2/PIK3CG/LYN/PROM2/HAVCR2/AIF1/FCGR1A/ALOX12B/FPR2/TLR4/NCKAP1L/UBA52/MLKL/SCIMP/IL15/CASS4/CD27/SEMA4D/MLST8/FGD2/CCR1/BANK1/IL12B/RPS3/HCLS1/STAP1/GPR183/FLT3/FFAR4/LCP2/S100A7/SEMA4C/TNF/LRRK2/CSF1R/NECAB2/KNDC1/CD74/FAS/P2RY6/CSF1/SOCS1/CRLF1/TLR6/IL18/IFNL1/PRR5/TNFSF18/CD3E/CD300A/EPO/WNT11/TNFSF15/FGFR3/FGF1/IRAK2/WNT3A/…
GO:0048645	animal organ formation	17/2341	17	BP	61/17910	0.00162821	0.0158899	RDH10/FGF1/WNT3A/HOXA11/SULF1/FGFR2/AXIN2/NTF4/FOXH1/TP63/TBX5/LRP2/ROBO2/HAND2/FOLR1/PAX2/BMP7
GO:0051591	response to cAMP	23/2341	23	BP	93/17910	0.001642	0.0159752	STAT1/SLC8A1/PIK3CG/BSG/DUOX1/PTAFR/KCNE1/ALDH3A1/SDC1/PCK1/DMTN/REN/WNT10B/CRHBP/ASS1/CFTR/HCN2/VGF/PTPRN/SLC6A3/AGXT/OXT/DUOX2
GO:0072080	nephron tubule development	23/2341	23	BP	93/17910	0.001642	0.0159752	STAT1/TACSTD2/IRX3/WNT11/FGF1/WNT6/HOXA11/WNT7B/CD24/GPC3/WNT1/HOXD11/IRX2/TCF21/TFAP2B/GATA3/IRX1/WNT4/LIF/PROM1/OSR1/AGT/PAX2
GO:0070231	T cell apoptotic process	14/2341	14	BP	46/17910	0.00164256	0.0159752	IDO1/CD274/FASLG/CCL5/IL2RA/GIMAP8/DOCK8/IL7R/PDCD1/CD27/PRKCQ/JAK3/LGALS9/ADAM8
GO:0002689	negative regulation of leukocyte chemotaxis	8/2341	8	BP	19/17910	0.00166525	0.0161226	GPR18/STAP1/KLRK1/SLAMF8/CCL2/MIF/KLRC4-KLRK1/CYP19A1
GO:0035458	cellular response to interferon-beta	8/2341	8	BP	19/17910	0.00166525	0.0161226	STAT1/IRF1/PYHIN1/MNDA/ACOD1/TLR3/AIM2/NDUFA13
GO:0051546	keratinocyte migration	8/2341	8	BP	19/17910	0.00166525	0.0161226	EPPK1/KRT2/KRT16/PPARD/FERMT1/FGF7/EPB41L4B/MMP9
GO:2000696	regulation of epithelial cell differentiation involved in kidney development	8/2341	8	BP	19/17910	0.00166525	0.0161226	STAT1/CD24/GATA3/LIF/PROM1/MMP9/OSR1/PAX2
GO:0004857	enzyme inhibitor activity	63/2173	63	MF	332/16967	0.000813378	0.0161896	DTX3L/PARP9/TNFAIP8/SLPI/NAIP/WARS1/SFN/PI3/RHOH/CD27/TNFSF14/HSPBP1/ELFN2/LRRK2/SPINK5/A2ML1/CST6/CST7/NLRP7/SOCS1/HSPB1/GMFG/SERPING1/SPOCK2/INKA1/PRKAR1B/CARD17/SNCB/COL4A3/WFDC1/ITPRIP/CPAMD8/CSTB/C4B/SERPINB3/BST2/CSTA/SERPINA1/HMSD/APOA1/IQGAP2/PPP1R1B/WFDC2/SH3RF2/GPC3/SERPINB9/PLN/SERPINB13/C3/CST2/SPINT1/PCSK1N/WFIKKN2/TFAP2B/CAMK2N2/C4A/ELFN1/LCN1/SPINK1/BIRC7/ITIH5/AMBP/APOA2
GO:0015645	fatty acid ligase activity	7/2173	7	MF	14/16967	0.000843593	0.0163432	ACSL5/SLC27A4/SLC27A2/SLC27A5/SLC27A3/ACSL6/SLC27A6
GO:0042834	peptidoglycan binding	7/2173	7	MF	14/16967	0.000843593	0.0163432	JCHAIN/TLR2/NLRP3/RNASE7/PGLYRP4/NOD2/IGHM
GO:0045471	response to ethanol	29/2341	29	BP	127/17910	0.00170594	0.0164978	CYBB/GRIN3A/VCAM1/EEF2/CD27/EIF4EBP1/DBH/PEMT/S100A8/CCL7/GSTP1/MGMT/FGFR2/SLC2A4/ADCYAP1R1/CRHBP/HAMP/GRIN1/CNR1/SLC6A3/CYP2E1/GATA3/NPPC/TH/CHRNB2/ACTC1/RBP4/LEP/IL13
GO:0034109	homotypic cell-cell adhesion	20/2341	20	BP	77/17910	0.00171119	0.0165299	CCL5/PLEK/P2RY12/PIK3CG/LYN/DSP/PRKCQ/JUP/ZNF703/HSPB1/PTPN6/WNT3A/TSPAN32/DSC2/TNFSF11/DMTN/PTPRU/HBB/CEACAM5/COMP
GO:0045211	postsynaptic membrane	57/2436	57	CC	299/18675	0.0019333	0.0165505	GRIN3A/SLC8A1/NSMF/CPEB3/TENM2/SEMA4C/NCS1/DBN1/LRFN1/LRFN4/CNIH2/SHANK1/DCC/SLC6A11/KCNA3/PTPRO/ARC/PRR7/FABP5/ADCY8/CHRNA6/GABRA5/GABRD/GRID1/CHRNA3/LRRTM2/P2RX1/EPHA4/CHRNA9/LHFPL4/KCNC1/SHANK2/CBLN1/GRM7/FXYD6/CHRNB4/NEURL1/EFNB3/INSYN1/ADGRB1/GRIN1/ADRA2C/SLC6A3/IGSF9B/SH2D5/CDH10/GLRA3/PLPPR4/GRIA4/RGS7BP/CACNG4/GABRG3/CHRNB2/CHRM1/GABBR2/KCNJ4/CHRNA4
GO:0009164	nucleoside catabolic process	11/2341	11	BP	32/17910	0.00171699	0.0165672	APOBEC3G/DPYD/APOBEC3D/NT5M/CDA/ADA2/APOBEC3A/APOBEC3F/AICDA/APOBEC3H/ENPP4
GO:0051896	regulation of protein kinase B signaling	48/2341	48	BP	241/17910	0.00175388	0.0168851	TRAT1/ICOS/CD80/CD86/P2RY12/PIK3CG/PIK3AP1/CD28/PIK3R2/BANK1/HCLS1/VAV1/LCK/MC1R/TNF/IL18/C1QTNF12/FGFR3/FGF1/CCL3/IL26/F10/FAM110C/ESR1/GPER1/EREG/RAC2/FGF5/PIK3R5/F7/FGFR2/TNFSF11/CX3CR1/ADAM8/CD19/FGFR4/XDH/AKR1C2/MEIS3/KIT/CCR7/HLA-G/FGF7/GATA3/CHI3L1/MYOC/LEP/CCL19
GO:1901617	organic hydroxy compound biosynthetic process	48/2341	48	BP	241/17910	0.00175388	0.0168851	GCH1/IFNG/PLEK/CD244/ISYNA1/MC1R/TNF/DBH/TM7SF2/IMPA2/P2RY6/SLC27A2/SLC27A5/ABCB11/PTAFR/FGF1/DKKL1/CACNA1H/APOB/ACER1/PTH1R/CDH3/GFI1/GPER1/PCK1/PNMT/OCA2/ITPKA/FGFR4/SNAI1/DHCR7/ADCYAP1R1/CFTR/IL1B/SLC6A3/GATA3/NPC1L1/WNT4/TH/PMEL/CYP19A1/SLC45A2/LEP/ALOX15/CES1/NTSR1/MALRD1/HAND2
GO:1902106	negative regulation of leukocyte differentiation	24/2341	24	BP	99/17910	0.00176389	0.0169624	IRF1/LILRB1/TLR3/TBX21/LYN/LAG3/TLR4/C1QC/CD74/LILRB4/INPP5D/LILRB3/SOCS1/IFNL1/NRARP/JAK3/TMEM176B/TNFSF4/CCL3/FOXJ1/FCGR2B/IHH/HLA-G/CTLA4
GO:0034703	cation channel complex	38/2436	38	CC	182/18675	0.00206349	0.0175014	GRIN3A/STAC3/SCNN1A/SCN5A/CNIH2/SHANK1/MCUB/KCNE1/OLFM2/KCNQ2/KCNIP3/PKD1L3/CACNA1G/SCNN1G/KCNH2/CATSPERB/KCNC1/KCNAB2/KCNK1/KCNG4/KCNMA1/HCN2/KCNJ1/DPP6/GRIN1/CACNG8/KCNN1/CNGB1/SCNN1B/GRIA4/CACNG4/CATSPERD/KCNA4/DPP10/SNAP25/NOS1/CACNA1B/KCNJ4
GO:0010466	negative regulation of peptidase activity	45/2341	45	BP	223/17910	0.00183154	0.0175931	TNFAIP8/SLPI/NAIP/SFN/PI3/CD27/TNFSF14/CR1/SPINK5/A2ML1/CST6/CST7/LAMP3/NLRP7/SPOCK2/ANXA8/IFI6/CARD17/COL4A3/WFDC1/CPAMD8/CSTB/C4B/SERPINB3/BST2/CSTA/HMSD/WFDC2/GPC3/SERPINB9/SERPINB13/C3/CST2/SPINT1/PCSK1N/WFIKKN2/TFAP2B/C4A/LCN1/SPINK1/MMP9/ITIH5/AMBP/NGFR/PAX2
GO:0008201	heparin binding	33/2173	33	MF	148/16967	0.000925537	0.0176948	CXCL10/CXCL11/PTPRC/CCL8/CXCL13/PLA2G2D/RPL29/TMEM184A/CCL7/RSPO3/ADA2/SELL/RTN4R/FGF1/APOB/CEL/FGFBP1/ADAMTSL5/ABI3BP/FGFR2/RSPO4/FGFR4/EVA1C/FGF7/ADAMTS3/LAMC2/PF4/COL25A1/CTSG/COMP/SAA1/BMP7/F2
GO:0005944	phosphatidylinositol 3-kinase complex, class IB	3/2436	3	CC	3/18675	0.0022171	0.0178146	PIK3CG/PIK3R6/PIK3R5
GO:0071750	dimeric IgA immunoglobulin complex	3/2436	3	CC	3/18675	0.0022171	0.0178146	JCHAIN/IGHA2/IGHA1
GO:0071752	secretory dimeric IgA immunoglobulin complex	3/2436	3	CC	3/18675	0.0022171	0.0178146	JCHAIN/IGHA2/IGHA1
GO:0071753	IgM immunoglobulin complex	3/2436	3	CC	3/18675	0.0022171	0.0178146	JCHAIN/IGKV3-20/IGHM
GO:0071754	IgM immunoglobulin complex, circulating	3/2436	3	CC	3/18675	0.0022171	0.0178146	JCHAIN/IGKV3-20/IGHM
GO:0071756	pentameric IgM immunoglobulin complex	3/2436	3	CC	3/18675	0.0022171	0.0178146	JCHAIN/IGKV3-20/IGHM
GO:0038187	pattern recognition receptor activity	8/2173	8	MF	18/16967	0.000947996	0.0178888	CLEC7A/TLR4/TLR2/CLEC4E/FCN1/PTAFR/PGLYRP4/MARCO
GO:0051705	multi-organism behavior	18/2341	18	BP	67/17910	0.00189765	0.0181793	SEPTIN5/SHANK1/GRID1/BRINP1/TBX1/CX3CR1/SHANK2/CRHBP/GRIN1/OXT/NRXN3/TH/CHRNB2/NRXN1/POU4F1/CNTFR/HAND2/NR2E1
GO:0002714	positive regulation of B cell mediated immunity	12/2341	12	BP	37/17910	0.00190108	0.0181793	PTPRC/TBX21/CD226/CD28/HLA-E/BTK/XCL1/TNF/LTA/TNFSF4/FCER2/C3
GO:0002891	positive regulation of immunoglobulin mediated immune response	12/2341	12	BP	37/17910	0.00190108	0.0181793	PTPRC/TBX21/CD226/CD28/HLA-E/BTK/XCL1/TNF/LTA/TNFSF4/FCER2/C3
GO:0046006	regulation of activated T cell proliferation	12/2341	12	BP	37/17910	0.00190108	0.0181793	PDCD1LG2/CD274/IL2RA/IL12RB1/IL12B/RPS3/ARG1/IL18/EPO/IL23R/LGALS9/CD24
GO:0048017	inositol lipid-mediated signaling	35/2341	35	BP	163/17910	0.00190987	0.018243	CCL5/NLRC3/RASGRP1/JAK2/PIK3CG/PIK3AP1/LYN/CD28/PIK3R2/SEMA4D/HCLS1/FLT3/CD160/TNF/CSF1R/PPP1R16B/NCS1/PPARD/IL18/PRR5/PTAFR/PTPN6/EPO/HCST/GPER1/SERPINA12/PIK3R5/NCF1/KIT/GPR143/GATA3/MYOC/LEP/AGT/F2
GO:0032355	response to estradiol	29/2341	29	BP	128/17910	0.00193574	0.0184695	CD38/EEF2/ENDOG/ZNF703/APOB/GSTP1/SSTR3/WFDC1/CD4/PTGFR/ESR1/GPER1/SLC34A1/F7/ADCYAP1R1/CRHBP/IL10/IHH/ASS1/MSX2/GJB2/OXT/TH/WNT7A/FOXA1/POU4F1/LEP/AGT/BMP7
GO:0001655	urogenital system development	61/2341	61	BP	324/17910	0.00195774	0.0186586	STAT1/EAF2/GCNT1/TACSTD2/LRRK2/RDH10/CRLF1/OVOL1/IRX3/WNT11/MPST/FGF1/PTPRO/SERPINB5/MMP17/COL4A3/PKD1L3/WNT6/HOXA11/ESR1/LGR5/SERPINB7/FOXJ1/NOTCH3/SDC1/SLC34A1/SULF1/COL4A4/FGFR2/EPHA4/SOX11/WNT7B/CD24/TP63/REN/PCSK9/CXCR2/GPC3/ASS1/EPCAM/WNT1/HOXD11/IRX2/TCF21/TFAP2B/GATA3/IRX1/WNT4/LIF/PROM1/MMP9/EMX2/CYP19A1/OSR1/ROBO2/FOXA1/RBP4/AGT/HOXB13/PAX2/BMP7
GO:0002637	regulation of immunoglobulin production	17/2341	17	BP	62/17910	0.00197469	0.0187992	PTPRC/FCRL3/TBX21/CD28/HLA-E/XCL1/GPI/TNF/CGAS/MZB1/IL33/TNFSF4/FCGR2B/CD40LG/IL10/RBP4/IL13
GO:0050767	regulation of neurogenesis	128/2341	128	BP	768/17910	0.00197831	0.0188052	B2M/CD38/CCR2/P2RY12/LYN/EFNA3/NSMF/NEUROG3/CPEB3/TLR2/SEMA4D/DUOXA1/STAP1/GPR183/SF3A2/TNF/LRRK2/KLK8/KNDC1/S100A9/RAC3/NCS1/PRKCH/DBN1/CSF1/ID1/CRABP2/LTA/SHANK1/DCC/IRX3/C1QA/TNFRSF1B/DLX2/EPO/ASCL2/RTN4R/KLK6/WNT3A/PTPRO/ARC/ZNF804A/SH3GL3/CCL3/PTK7/GFI1/GPER1/PTK6/NGEF/NOTCH3/BRINP1/CHRNA3/BCL11B/RASSF10/OLFM1/RTN4RL2/CXCL12/NFATC4/BRSK2/CXCR4/EMX1/NDRG4/EPHA4/GPC2/DMRTA2/SOX11/ITPKA/CX3CR1/…
GO:0030260	entry into host cell	30/2341	30	BP	134/17910	0.00198852	0.0188052	CD80/CCR5/CD86/SLAMF1/HAVCR1/TRIM21/NECTIN1/IFITM1/MRC1/KRT6A/CR1/NECTIN4/CD74/FCN1/GPR15/ITGB7/CD4/SELPLG/SERPINB3/LGALS9/CXCR4/CD209/ITGB6/CLDN6/CLEC5A/EFNB3/AXL/PTX3/MOG/CR2
GO:0031644	regulation of neurological system process	30/2341	30	BP	134/17910	0.00198852	0.0188052	LRRK2/KLK8/CST7/CNIH2/SHANK1/PTAFR/TNFRSF1B/CCL3/FABP5/GHRL/NOS3/NPTX1/CUX2/CBLN1/IL10/NMU/CHRNB4/GRIN1/ADRA2C/IGSF9B/OXT/CELF4/CACNG4/NCMAP/WNT7A/NRXN1/AGT/MAG/NTSR1/RIMS2
GO:0044409	entry into host	30/2341	30	BP	134/17910	0.00198852	0.0188052	CD80/CCR5/CD86/SLAMF1/HAVCR1/TRIM21/NECTIN1/IFITM1/MRC1/KRT6A/CR1/NECTIN4/CD74/FCN1/GPR15/ITGB7/CD4/SELPLG/SERPINB3/LGALS9/CXCR4/CD209/ITGB6/CLDN6/CLEC5A/EFNB3/AXL/PTX3/MOG/CR2
GO:0051806	entry into cell of other organism involved in symbiotic interaction	30/2341	30	BP	134/17910	0.00198852	0.0188052	CD80/CCR5/CD86/SLAMF1/HAVCR1/TRIM21/NECTIN1/IFITM1/MRC1/KRT6A/CR1/NECTIN4/CD74/FCN1/GPR15/ITGB7/CD4/SELPLG/SERPINB3/LGALS9/CXCR4/CD209/ITGB6/CLDN6/CLEC5A/EFNB3/AXL/PTX3/MOG/CR2
GO:0051828	entry into other organism involved in symbiotic interaction	30/2341	30	BP	134/17910	0.00198852	0.0188052	CD80/CCR5/CD86/SLAMF1/HAVCR1/TRIM21/NECTIN1/IFITM1/MRC1/KRT6A/CR1/NECTIN4/CD74/FCN1/GPR15/ITGB7/CD4/SELPLG/SERPINB3/LGALS9/CXCR4/CD209/ITGB6/CLDN6/CLEC5A/EFNB3/AXL/PTX3/MOG/CR2
GO:1904064	positive regulation of cation transmembrane transport	31/2341	31	BP	140/17910	0.00203233	0.0191982	CXCL10/CXCL11/CXCL9/IFNG/CTSS/CCR2/GLRX/GAL/XCL1/STAC3/TMSB4X/P2RY6/CCL2/KCNE1/PLCG2/CHCHD10/GPER1/EDN3/KCNH2/CD19/KCNC1/STAC2/HAP1/WNK2/CACNG4/NOS1/IL13/AGT/NTSR1/TRDN/F2
GO:0002495	antigen processing and presentation of peptide antigen via MHC class II	24/2341	24	BP	100/17910	0.00203883	0.0192383	CTSS/MARCHF1/HLA-DOA/HLA-DRA/LAG3/AP1M2/HLA-DMB/HLA-DPA1/HLA-DRB1/HLA-DQA2/HLA-DPB1/HLA-DOB/HLA-DQA1/CD74/HLA-DQB1/HLA-DMA/SPTBN2/HLA-DRB5/LGMN/IFI30/KIF26A/HLA-DQB2/FCGR2B/CTSE
GO:0030670	phagocytic vesicle membrane	19/2436	19	CC	74/18675	0.00248804	0.0198177	B2M/TAP1/CYBB/HLA-B/HLA-F/HLA-C/HLA-E/TAP2/TLR2/TLR1/RAB8B/RAB23/TLR6/HLA-H/CORO1A/RAB39A/RAC2/RAB38/HLA-G
GO:0035295	tube development	175/2341	175	BP	1093/17910	0.00211316	0.0199178	STAT1/CXCL10/CYBB/FASLG/CCR2/CXCL13/ERAP1/TLR3/SP100/PIK3CG/RNF213/EFNA3/WARS1/PHEX/KRT1/ABCA12/HSD11B1/PRDM1/RAB3A/CCR3/ESRP2/GJB5/TACSTD2/ZNF358/CD160/EIF4EBP1/S100A7/C3AR1/CXCR3/SEMA4C/TNF/EGFL7/SPINK5/CSF1R/RDH10/LRP5/PAK4/PPP1R16B/JUP/ARG1/CSF1/ID1/CRLF1/CCL2/PLCD3/ETV2/IL18/RSPO3/REC8/HSPB1/PRKCB/TNFAIP2/IRX3/SFTPD/WNT11/ITGB2/FGF1/GRHL2/WNT3A/APOB/GRHL3/CYP1B1/PTK7/COL4A3/FGFBP1/WNT6/HOXA1…
GO:0050728	negative regulation of inflammatory response	36/2341	36	BP	170/17910	0.00213685	0.0200958	PTPRC/ABCD2/PTGER4/ACOD1/NLRC3/IL2RA/CD200R1/FPR2/KRT1/RPS19/IL12B/SIGLEC10/FFAR4/SLAMF8/CST7/NLRP3/NLRP7/NLRX1/TNFRSF1B/C1QTNF12/GSTP1/MEFV/IL20RB/NLRP6/WFDC1/GHRL/GPER1/FCGR2B/APOA1/IL10/CNR2/GATA3/IL22RA2/CYP19A1/SAA1/F2
GO:0030100	regulation of endocytosis	51/2341	51	BP	262/17910	0.00214638	0.0200958	B2M/PTPRC/LILRB1/IL15RA/PROM2/FPR2/DOCK2/NCKAP1L/IL2RB/IL15/TLR2/STAP1/ANKRD13B/C2/TNF/LRRK2/NECAB2/HCK/TULP1/IL2RG/CCL2/CD300A/SFTPD/CD300LF/WNT3A/ARC/SH3GL3/PLCG2/TFR2/C4B/FCGR2B/LRRTM2/SLC2A4/APOA1/PCSK9/PACSIN1/GPC3/CDH13/C3/SELE/AXL/IL1B/PRTN3/GSG1L/C4A/PTX3/SPACA3/ALOX15/APOA2/CCL19/MBL2
GO:0033674	positive regulation of kinase activity	94/2341	94	BP	541/17910	0.00218137	0.0200958	IFNG/PTPRC/CCL5/RASGRP1/TLR3/JAK2/P2RY12/PIK3CG/LYN/FCGR1A/FPR2/TLR4/NCKAP1L/UBA52/MLKL/CASS4/MLST8/FGD2/IL12B/RPS3/STAP1/FLT3/LCP2/TNF/LRRK2/CSF1R/CD74/CSF1/SOCS1/TLR6/IL18/PRR5/CD300A/EPO/WNT11/TNFSF15/FGFR3/FGF1/IRAK2/WNT3A/DUSP9/MAP4K1/MIF/NOD2/FPR1/PRKAR1B/ADCY8/GHRL/CD4/PIK3R6/VAV3/EREG/S100A12/GNG3/CHRNA3/IL23R/EDN3/PIK3R5/AVPI1/CD40LG/EEF1A2/NCF1/CXCR4/SHC2/EPHA4/TNFSF11/FZD8/WNT7B/LILRA5…
GO:0042472	inner ear morphogenesis	23/2341	23	BP	95/17910	0.00221451	0.0200958	USH1G/MYO7A/TIFAB/WNT3A/GRHL3/DLX5/PTK7/FRZB/OTX1/TBX1/FGFR2/ATP6V1B1/CHRNA9/HMX2/RIPOR2/WNT1/DLX6/GBX2/ATP8A2/GATA3/KCNQ4/PAX2/MYO3A
GO:0045069	regulation of viral genome replication	23/2341	23	BP	95/17910	0.00221451	0.0200958	RSAD2/CCL8/CCL5/IFIT5/APOBEC3G/SLPI/IFIT1/OAS1/CD28/OASL/IFITM1/APOBEC3D/RESF1/OAS3/TNF/MX1/APOBEC3A/APOBEC3F/APOBEC3H/ISG15/BST2/FKBP6/IFI27
GO:0042446	hormone biosynthetic process	21/2341	21	BP	84/17910	0.00222121	0.0200958	IFNG/HSD11B1/HSD11B2/FDX2/TNF/DUOX1/LHB/HSD17B1/DKKL1/CACNA1H/HSD17B2/GFI1/AKR1B15/CYP11A1/HSD17B14/IL1B/WNT4/CHST8/DUOX2/CYP19A1/HSD3B2
GO:0002477	antigen processing and presentation of exogenous peptide antigen via MHC class Ib	3/2341	3	BP	3/17910	0.00223066	0.0200958	B2M/HLA-F/HLA-E
GO:0002503	peptide antigen assembly with MHC class II protein complex	3/2341	3	BP	3/17910	0.00223066	0.0200958	HLA-DRA/HLA-DMB/HLA-DMA
GO:0002519	natural killer cell tolerance induction	3/2341	3	BP	3/17910	0.00223066	0.0200958	HAVCR2/HLA-E/LGALS9
GO:0002774	Fc receptor mediated inhibitory signaling pathway	3/2341	3	BP	3/17910	0.00223066	0.0200958	LILRB1/LYN/LILRB2
GO:0002874	regulation of chronic inflammatory response to antigenic stimulus	3/2341	3	BP	3/17910	0.00223066	0.0200958	TNF/LTA/IL10
GO:0006145	purine nucleobase catabolic process	3/2341	3	BP	3/17910	0.00223066	0.0200958	DPYD/XDH/GDA
GO:0010481	epidermal cell division	3/2341	3	BP	3/17910	0.00223066	0.0200958	SFN/KDF1/TP63
GO:0010482	regulation of epidermal cell division	3/2341	3	BP	3/17910	0.00223066	0.0200958	SFN/KDF1/TP63
GO:0014707	branchiomeric skeletal muscle development	3/2341	3	BP	3/17910	0.00223066	0.0200958	PITX1/MSC/TCF21
GO:0030886	negative regulation of myeloid dendritic cell activation	3/2341	3	BP	3/17910	0.00223066	0.0200958	HAVCR2/TSPAN32/IL10
GO:0033078	extrathymic T cell differentiation	3/2341	3	BP	3/17910	0.00223066	0.0200958	IL15/PRDM1/ZNF683
GO:0034343	type III interferon production	3/2341	3	BP	3/17910	0.00223066	0.0200958	IFIH1/DDX58/TLR3
GO:0034344	regulation of type III interferon production	3/2341	3	BP	3/17910	0.00223066	0.0200958	IFIH1/DDX58/TLR3
GO:0043163	cell envelope organization	3/2341	3	BP	3/17910	0.00223066	0.0200958	TGM1/HRNR/TGM3
GO:0045229	external encapsulating structure organization	3/2341	3	BP	3/17910	0.00223066	0.0200958	TGM1/HRNR/TGM3
GO:0060084	synaptic transmission involved in micturition	3/2341	3	BP	3/17910	0.00223066	0.0200958	CHRNA3/CHRNB4/CHRNB2
GO:0060557	positive regulation of vitamin D biosynthetic process	3/2341	3	BP	3/17910	0.00223066	0.0200958	IFNG/TNF/IL1B
GO:0060559	positive regulation of calcidiol 1-monooxygenase activity	3/2341	3	BP	3/17910	0.00223066	0.0200958	IFNG/TNF/IL1B
GO:0061184	positive regulation of dermatome development	3/2341	3	BP	3/17910	0.00223066	0.0200958	WNT3A/WNT1/WNT4
GO:0070340	detection of bacterial lipopeptide	3/2341	3	BP	3/17910	0.00223066	0.0200958	TLR2/TLR1/TLR6
GO:0072139	glomerular parietal epithelial cell differentiation	3/2341	3	BP	3/17910	0.00223066	0.0200958	FOXJ1/CD24/PROM1
GO:0090634	microglial cell mediated cytotoxicity	3/2341	3	BP	3/17910	0.00223066	0.0200958	STAP1/TYROBP/ITGAM
GO:0150062	complement-mediated synapse pruning	3/2341	3	BP	3/17910	0.00223066	0.0200958	C1QA/ITGAM/C3
GO:0150064	vertebrate eye-specific patterning	3/2341	3	BP	3/17910	0.00223066	0.0200958	C1QA/ITGAM/C3
GO:1903797	positive regulation of inorganic anion transmembrane transport	3/2341	3	BP	3/17910	0.00223066	0.0200958	PTAFR/SLC34A1/CFTR
GO:1903971	positive regulation of response to macrophage colony-stimulating factor	3/2341	3	BP	3/17910	0.00223066	0.0200958	TLR4/TLR2/CSF1
GO:1903974	positive regulation of cellular response to macrophage colony-stimulating factor stimulus	3/2341	3	BP	3/17910	0.00223066	0.0200958	TLR4/TLR2/CSF1
GO:1904149	regulation of microglial cell mediated cytotoxicity	3/2341	3	BP	3/17910	0.00223066	0.0200958	STAP1/TYROBP/ITGAM
GO:1904151	positive regulation of microglial cell mediated cytotoxicity	3/2341	3	BP	3/17910	0.00223066	0.0200958	STAP1/TYROBP/ITGAM
GO:2000361	regulation of prostaglandin-E synthase activity	3/2341	3	BP	3/17910	0.00223066	0.0200958	ITGB2/NOD2/ITGAM
GO:2000363	positive regulation of prostaglandin-E synthase activity	3/2341	3	BP	3/17910	0.00223066	0.0200958	ITGB2/NOD2/ITGAM
GO:2000412	positive regulation of thymocyte migration	3/2341	3	BP	3/17910	0.00223066	0.0200958	CCR2/XCL1/ADAM8
GO:2000502	negative regulation of natural killer cell chemotaxis	3/2341	3	BP	3/17910	0.00223066	0.0200958	KLRK1/CCL2/KLRC4-KLRK1
GO:2000523	regulation of T cell costimulation	3/2341	3	BP	3/17910	0.00223066	0.0200958	CD160/TNFSF4/CCR7
GO:2001183	negative regulation of interleukin-12 secretion	3/2341	3	BP	3/17910	0.00223066	0.0200958	LILRB1/TLR8/LILRA5
GO:0007613	memory	26/2341	26	BP	112/17910	0.00225364	0.0200958	B4GALT2/CPEB3/JPH3/DBH/KLK8/SHANK1/LGMN/ASIC1/ARC/RIN1/ADCY8/BRINP1/NFATC4/NTF4/CX3CR1/CUX2/PPP1R1B/SLC8A2/GRIN1/CNR1/FOXO6/OXT/TH/CHRNB2/LRRN4/ADGRF1
GO:0031069	hair follicle morphogenesis	9/2341	9	BP	24/17910	0.00225703	0.0200958	KRT17/FOXQ1/FGFR2/TGM3/SNAI1/TP63/FOXE1/FGF7/SOSTDC1
GO:0032958	inositol phosphate biosynthetic process	9/2341	9	BP	24/17910	0.00225703	0.0200958	PLEK/CD244/P2RY6/PTAFR/PTH1R/GPER1/ITPKA/ADCYAP1R1/NTSR1
GO:0046135	pyrimidine nucleoside catabolic process	9/2341	9	BP	24/17910	0.00225703	0.0200958	APOBEC3G/DPYD/APOBEC3D/NT5M/CDA/APOBEC3A/APOBEC3F/AICDA/APOBEC3H
GO:0090023	positive regulation of neutrophil chemotaxis	9/2341	9	BP	24/17910	0.00225703	0.0200958	NCKAP1L/C3AR1/XCL1/CD74/RAC2/CXCR2/RIPOR2/CCR7/CCL19
GO:0002517	T cell tolerance induction	6/2341	6	BP	12/17910	0.00226134	0.0200958	IDO1/ICOS/IL2RA/LILRB2/CD3E/HLA-G
GO:0043301	negative regulation of leukocyte degranulation	6/2341	6	BP	12/17910	0.00226134	0.0200958	CCR2/CD84/HLA-F/CD300A/LGALS9/FCGR2B
GO:0045078	positive regulation of interferon-gamma biosynthetic process	6/2341	6	BP	12/17910	0.00226134	0.0200958	TLR8/TLR7/TLR3/IL27/EBI3/IL12B
GO:0051238	sequestering of metal ion	6/2341	6	BP	12/17910	0.00226134	0.0200958	S100A7/S100A8/S100A9/LCN2/SLC30A3/SLC30A2
GO:0051712	positive regulation of killing of cells of other organism	6/2341	6	BP	12/17910	0.00226134	0.0200958	IFNG/PRF1/ARG1/PGLYRP4/FCER2/NOS2
GO:0072540	T-helper 17 cell lineage commitment	6/2341	6	BP	12/17910	0.00226134	0.0200958	TBX21/SLAMF6/IL12RB1/IL12B/LY9/IL23R
GO:0090713	immunological memory process	6/2341	6	BP	12/17910	0.00226134	0.0200958	IL12RB1/IL12B/CD160/IFNL1/TNFSF4/IL23R
GO:1902563	regulation of neutrophil activation	6/2341	6	BP	12/17910	0.00226134	0.0200958	PTAFR/CD300A/ITGB2/ITGAM/FCGR2B/PRAM1
GO:2001198	regulation of dendritic cell differentiation	6/2341	6	BP	12/17910	0.00226134	0.0200958	LILRB1/LILRB2/TMEM176B/LGALS9/FCGR2B/HLA-G
GO:0035115	embryonic forelimb morphogenesis	11/2341	11	BP	33/17910	0.00227519	0.0201769	ZNF358/RDH10/CRABP2/HOXA9/HOXA11/WNT3/TP63/MSX2/TBX5/WNT7A/OSR1
GO:0042554	superoxide anion generation	11/2341	11	BP	33/17910	0.00227519	0.0201769	CYBB/FPR2/DUOX1/TYROBP/ITGB2/NCF2/GSTP1/ITGAM/NCF1/DUOX2/AGT
GO:0010942	positive regulation of cell death	119/2341	119	BP	710/17910	0.00230163	0.0203849	IDO1/CD274/UBD/IFNG/IFIT2/PTPRC/FASLG/CYLD/MNDA/LILRB1/TNFSF10/CCL5/SOD2/TNFAIP8/GZMA/TLR3/JAK2/LYN/NLRC4/SFN/TLR4/UBA52/PDCD1/GZMB/FGD2/IL12B/RPS3/GAL/STK17B/VAV1/LCK/SLFN11/CD160/TNF/ENDOG/S100A8/MTCO2P12/LRRK2/NDUFA13/FAS/S100A9/INPP5D/NLRP3/KMO/ARHGEF3/TLR6/CCL2/LTA/C1QA/TNFRSF1B/WNT11/TYROBP/TNFSF15/ITGB2/DKKL1/WNT3A/ARHGEF4/CYP1B1/CCL3/PRR7/ITGAM/PIP5KL1/COL4A3/PLEKHG5/CHCHD10/FRZB/ARHGEF6/…
GO:0009653	anatomical structure morphogenesis	377/2341	377	BP	2535/17910	0.00230341	0.0203849	GBP1/STAT1/CXCL10/CXCL9/ETV7/CYBB/FASLG/CDC42SE2/KRT17/CCR2/CXCL13/ERAP1/TLR3/SP100/PIK3CG/PSMB9/RNF213/EFNA3/WARS1/NSMF/NEUROG3/FLG2/FLI1/CD53/IL7/TNFSF13B/BSG/IL7R/PSMB8/RAB25/GCNT1/CASS4/ARHGAP15/PHEX/PSME2/KRT1/TLR2/NAT8B/SEMA4D/FGD2/TNFSF14/NECTIN1/PRDM1/ARHGAP18/CCR3/GAL/SPTA1/KRT16/ESRP2/GJB5/MYBPC3/TACSTD2/CAMSAP3/KBTBD8/KLHL6/SLC40A1/ZNF358/CD160/DLX3/PITX1/USH1G/DSP/S100A7/C3AR1/CXCR3/K…
GO:0002573	myeloid leukocyte differentiation	41/2341	41	BP	201/17910	0.00231271	0.0204461	UBD/IFNG/LILRB1/GAB3/TLR3/BATF2/LYN/EVI2B/TLR4/IL15/TLR2/CCR1/IL12B/HCLS1/GPR183/TNF/C1QC/CSF1R/CD74/LILRB4/INPP5D/LILRB3/CSF1/TYROBP/CCL3/CD4/IL23R/TNFSF11/EFNA2/GPC3/KIT/CCR7/IL31RA/PRTN3/GATA3/PF4/LIF/MMP9/POU4F1/CCL19/IL20
GO:0002504	antigen processing and presentation of peptide or polysaccharide antigen via MHC class II	24/2341	24	BP	101/17910	0.00234943	0.0207492	CTSS/MARCHF1/HLA-DOA/HLA-DRA/LAG3/AP1M2/HLA-DMB/HLA-DPA1/HLA-DRB1/HLA-DQA2/HLA-DPB1/HLA-DOB/HLA-DQA1/CD74/HLA-DQB1/HLA-DMA/SPTBN2/HLA-DRB5/LGMN/IFI30/KIF26A/HLA-DQB2/FCGR2B/CTSE
GO:0050786	RAGE receptor binding	6/2173	6	MF	11/16967	0.00113833	0.0208383	S100A7/S100P/S100A8/S100A9/FPR1/S100A12
GO:0061134	peptidase regulator activity	40/2173	40	MF	192/16967	0.00117563	0.0208383	TNFAIP8/SLPI/NAIP/PI3/CD27/TNFSF14/SPINK5/A2ML1/CST6/CST7/NLRP7/SERPING1/SPOCK2/CARD17/COL4A3/WFDC1/CPAMD8/CSTB/C4B/SERPINB3/BST2/CSTA/SERPINA1/HMSD/WFDC2/GPC3/SERPINB9/SERPINB13/C3/CST2/SPINT1/PCSK1N/WFIKKN2/TFAP2B/C4A/LCN1/SPINK1/BIRC7/ITIH5/AMBP
GO:0001540	amyloid-beta binding	19/2173	19	MF	71/16967	0.00118384	0.0208383	MSR1/LILRB2/FPR2/TLR4/TLR2/CD74/TLR6/C1QA/ITGB2/ITGAM/FCGR2B/EPHA4/APOA1/MARCO/GRIN1/GRIA4/COL25A1/NGFR/CACNA1B
GO:0001851	complement component C3b binding	4/2173	4	MF	5/16967	0.00120469	0.0208383	CR1/VSIG4/ITGB2/ITGAM
GO:0005143	interleukin-12 receptor binding	4/2173	4	MF	5/16967	0.00120469	0.0208383	JAK2/IL12RB1/IL12B/IL23R
GO:0016493	C-C chemokine receptor activity	4/2173	4	MF	5/16967	0.00120469	0.0208383	CCR5/CCR1/CCR6/CCR7
GO:0031726	CCR1 chemokine receptor binding	4/2173	4	MF	5/16967	0.00120469	0.0208383	CCL5/CCL4/CCL7/CCL3
GO:0097305	response to alcohol	46/2341	46	BP	232/17910	0.00236621	0.0208759	CYBB/CCR5/GRIN3A/XRN1/VCAM1/EEF2/CD27/PTGER2/EIF4EBP1/PTGDR/DBH/PEMT/S100A8/JUP/P2RY6/CCL7/TNFSF4/MAP4K1/GSTP1/CCL3/ADCY8/PTGFR/MGMT/F7/FGFR2/SLC2A4/ADCYAP1R1/AKR1C2/CRHBP/CFTR/CCR7/HAMP/GRIN1/CNR1/SLC6A3/CYP2E1/GATA3/OXT/NPPC/TH/CHRNB2/ACTC1/RBP4/LEP/IL13/CCL19
GO:0072028	nephron morphogenesis	20/2341	20	BP	79/17910	0.0023829	0.0210015	STAT1/TACSTD2/IRX3/WNT11/FGF1/WNT6/HOXA11/GPC3/WNT1/HOXD11/IRX2/TCF21/GATA3/IRX1/WNT4/LIF/OSR1/AGT/PAX2/BMP7
GO:0015267	channel activity	68/2173	68	MF	370/16967	0.0012523	0.021407	APOL1/CYBB/GRIN3A/CLIC2/PRF1/CLCA2/TTYH3/SLC40A1/CLIC5/SCNN1A/NCS1/ANO7/SCN5A/CLDN4/ASIC1/GJB4/KCNE1/ITPR1/CACNA1H/KCNA3/AQP5/KCNQ2/KCNK7/KCNIP3/PKD1L3/CHRNA6/TTYH1/GABRD/GRID1/SLC4A11/CACNA1G/CHRNA3/TPCN2/SLC26A9/SCNN1G/GJB3/P2RX1/TRPV5/CHRNA9/KCNH2/KCNC1/AQP3/KCNAB2/KCNK1/CFTR/KCNG4/KCNMA1/HCN2/CHRNB4/GJB2/GRIN1/CNR1/CACNG8/KCNF1/KCNN1/GLRA3/BEST2/CNGB1/SCNN1B/KCNQ4/GRIA4/TRPM5/CHRNB2/KCNA4/SNA…
GO:0043277	apoptotic cell clearance	12/2341	12	BP	38/17910	0.00245271	0.0215934	C2/FCN1/CCL2/TYROBP/CD300LF/C4B/MARCO/C3/AXL/ADGRB1/C4A/ALOX15
GO:0043369	CD4-positive or CD8-positive, alpha-beta T cell lineage commitment	8/2341	8	BP	20/17910	0.00246017	0.0215934	CYLD/TBX21/SLAMF6/IL12RB1/IL12B/SPN/LY9/IL23R
GO:0051797	regulation of hair follicle development	8/2341	8	BP	20/17910	0.00246017	0.0215934	KRT17/GAL/TNF/SPINK5/FERMT1/CDH3/WNT10B/MSX2
GO:0060713	labyrinthine layer morphogenesis	8/2341	8	BP	20/17910	0.00246017	0.0215934	GJB5/RSPO3/GRHL2/FGFR2/WNT7B/IL10/SPINT1/BMP7
GO:0046683	response to organophosphorus	29/2341	29	BP	130/17910	0.00247599	0.02171	STAT1/SLC8A1/P2RY12/PIK3CG/BSG/P2RY6/DUOX1/PTAFR/KCNE1/ALDH3A1/CIB2/SDC1/PCK1/P2RX1/DMTN/REN/WNT10B/P2RY2/CRHBP/ASS1/CFTR/HCN2/VGF/PTPRN/IL1B/SLC6A3/AGXT/OXT/DUOX2
GO:0002295	T-helper cell lineage commitment	7/2341	7	BP	16/17910	0.00251181	0.0219117	TBX21/SLAMF6/IL12RB1/IL12B/SPN/LY9/IL23R
GO:0033033	negative regulation of myeloid cell apoptotic process	7/2341	7	BP	16/17910	0.00251181	0.0219117	CCR5/CCL5/EPO/MIF/NOD2/CXCR2/CLEC5A
GO:0044117	growth of symbiont in host	7/2341	7	BP	16/17910	0.00251181	0.0219117	IRF8/IL12B/TNF/LTA/IL10/CTSG/MBL2
GO:0045072	regulation of interferon-gamma biosynthetic process	7/2341	7	BP	16/17910	0.00251181	0.0219117	LILRB1/TLR8/TLR7/TLR3/IL27/EBI3/IL12B
GO:0060263	regulation of respiratory burst	7/2341	7	BP	16/17910	0.00251181	0.0219117	JCHAIN/RPS19/SLAMF8/NOXA1/RAC2/IGHA2/IGHA1
GO:0003044	regulation of systemic arterial blood pressure mediated by a chemical signal	13/2341	13	BP	43/17910	0.00254368	0.0221446	SOD2/HSD11B2/SLC2A5/SUCNR1/EDN3/RASL10B/NOS3/REN/EDN2/CES1/CTSG/AGT/CMA1
GO:0043300	regulation of leukocyte degranulation	13/2341	13	BP	43/17910	0.00254368	0.0221446	CCR2/CD84/LYN/HLA-F/PTAFR/CD300A/ITGB2/ITGAM/RAC2/LGALS9/FCGR2B/PRAM1/IL13
GO:0005911	cell-cell junction	74/2436	74	CC	414/18675	0.00281263	0.0222101	THEMIS/DDX58/ITK/CD2/SLC8A1/LYN/CD53/EPPK1/TRIM29/PKP1/COL17A1/NECTIN1/EVPL/GJB5/DSC3/CAMSAP3/VAV1/LCP2/DSP/NECTIN4/PPL/JAML/PAK4/AJAP1/JUP/DBN1/CRB3/SCN5A/CLDN4/ABCB11/CD3E/PTPN6/CORO1A/PKP3/DSG1/CDH24/GJB4/GRHL2/DSC1/WAS/PTK7/VAMP5/PLEKHG5/MAPK15/SLC2A1/POF1B/BAIAP2L2/GJB3/ZAP70/RASIP1/DSC2/CLDN6/FGFR4/DSG3/ADCYAP1R1/AQP3/KIT/FSCN1/SKAP1/EPCAM/MXRA8/GJB2/PERP/HAMP/ADGRB1/EPB41L4B/CALB2/PTPRU/FA…
GO:0072006	nephron development	31/2341	31	BP	142/17910	0.00256586	0.0223004	STAT1/TACSTD2/IRX3/WNT11/FGF1/PTPRO/COL4A3/WNT6/HOXA11/SERPINB7/FOXJ1/NOTCH3/SULF1/COL4A4/WNT7B/CD24/GPC3/WNT1/HOXD11/IRX2/TCF21/TFAP2B/GATA3/IRX1/WNT4/LIF/PROM1/OSR1/AGT/PAX2/BMP7
GO:1903727	positive regulation of phospholipid metabolic process	14/2341	14	BP	48/17910	0.0025668	0.0223004	P2RY12/LYN/FPR2/FLT3/FGFR3/NOD2/FABP3/VAV3/CD19/RAB38/KIT/CCR7/EPHA8/CCL19
GO:0022803	passive transmembrane transporter activity	68/2173	68	MF	371/16967	0.00134585	0.0224516	APOL1/CYBB/GRIN3A/CLIC2/PRF1/CLCA2/TTYH3/SLC40A1/CLIC5/SCNN1A/NCS1/ANO7/SCN5A/CLDN4/ASIC1/GJB4/KCNE1/ITPR1/CACNA1H/KCNA3/AQP5/KCNQ2/KCNK7/KCNIP3/PKD1L3/CHRNA6/TTYH1/GABRD/GRID1/SLC4A11/CACNA1G/CHRNA3/TPCN2/SLC26A9/SCNN1G/GJB3/P2RX1/TRPV5/CHRNA9/KCNH2/KCNC1/AQP3/KCNAB2/KCNK1/CFTR/KCNG4/KCNMA1/HCN2/CHRNB4/GJB2/GRIN1/CNR1/CACNG8/KCNF1/KCNN1/GLRA3/BEST2/CNGB1/SCNN1B/KCNQ4/GRIA4/TRPM5/CHRNB2/KCNA4/SNA…
GO:0016175	superoxide-generating NADPH oxidase activity	5/2173	5	MF	8/16967	0.00137249	0.0224516	CYBB/NCF2/NCF1B/NCF1/NCF1C
GO:0045028	G protein-coupled purinergic nucleotide receptor activity	5/2173	5	MF	8/16967	0.00137249	0.0224516	P2RY10/P2RY12/P2RY8/P2RY6/P2RY2
GO:0016702	oxidoreductase activity, acting on single donors with incorporation of molecular oxygen, incorporation of two atoms of oxygen	9/2173	9	MF	23/16967	0.00137522	0.0224516	IDO1/IDO2/ALOX12B/ALOXE3/ALOX5/HPDL/TDO2/P4HA3/ALOX15
GO:0007187	G protein-coupled receptor signaling pathway, coupled to cyclic nucleotide second messenger	37/2341	37	BP	178/17910	0.00262449	0.0227784	CXCL10/CXCL11/AKAP5/CXCL9/GPR65/PTGER4/P2RY12/FPR2/CCR1/SSTR2/TSHR/CCR3/PTGER2/MC1R/XCR1/CCL2/CRHR1/FPR1/SSTR3/PTH1R/ADCY8/GPER1/PALM/S1PR4/GRM7/CNR2/GNAL/MARCO/PLN/CNR1/VIPR1/PF4/GPR78/NOS1/AGT/RAMP1/ADGRF1
GO:0001659	temperature homeostasis	36/2341	36	BP	172/17910	0.00263237	0.0228237	CCR2/JAK2/TLR4/IL15/TSHR/PLCL2/PLAC8/FFAR4/CMKLR1/TNF/DBH/PEMT/ID1/IL18/IL18R1/FABP5/MFAP2/GHRL/CXCR4/TNFSF11/YBX2/LCN2/ZNF423/EDN2/WNT10B/NMU/CNR1/IL1B/CIDEA/ACADL/OXT/KSR2/LEP/IL13/NTSR1/PRLR
GO:0031904	endosome lumen	11/2436	11	CC	34/18675	0.00292468	0.0228975	B2M/CTSS/JAK2/PRF1/IL12B/LGMN/APOB/SFTPC/LRP2/PGA5/PRLR
GO:0050718	positive regulation of interleukin-1 beta secretion	10/2341	10	BP	29/17910	0.00268967	0.0232732	TLR8/TLR4/AIM2/NLRP3/NOD2/CCL3/LILRA2/LGALS9/LILRA5/CCL19
GO:2000778	positive regulation of interleukin-6 secretion	10/2341	10	BP	29/17910	0.00268967	0.0232732	IFIH1/DDX58/TLR8/AIF1/TNF/PAEP/LILRA2/LGALS9/LILRA5/IL1B
GO:0019239	deaminase activity	8/2173	8	MF	19/16967	0.0014548	0.0234869	ZBP1/APOBEC3G/CDA/ADA2/APOBEC3A/APOBEC3F/AICDA/APOBEC3H
GO:0031526	brush border membrane	14/2436	14	CC	49/18675	0.00311042	0.0241453	PEMT/SLC27A4/CA4/PTH1R/SLC34A1/AMN/SHANK2/SLC34A3/KCNK1/NPC1L1/LRP2/SLC34A2/SLC5A1/FOLR1
GO:0044297	cell body	90/2436	90	CC	522/18675	0.00317722	0.0244566	CYBB/GRIN3A/CCR2/TBX21/P2RY12/NSMF/AIF1/XRN1/DDN/TLR2/RPL28/CCR4/GAL/NAXE/ENDOG/CPLX1/LRRK2/KNDC1/ERMN/RAC3/NDUFS7/ARG1/SPTBN2/TNFRSF1B/CD3E/TMPRSS3/DPYSL5/EPO/RTN4R/ASTN2/APOB/ARC/ZNF804A/RIN1/ADCY8/TUBB4A/TTLL7/GABRA5/GNG3/CHRNA3/SLC1A3/FCGR2B/OLFM1/RTN4RL2/EEF1A2/NCF1/EPHA4/DNER/RBFOX3/PDE9A/CX3CR1/TTBK1/EFNA2/KCNC1/SHANK2/PPP1R1B/CRHBP/KCNK1/CNR2/ASS1/NEURL1/GJB2/PTPRN/SLC8A2/ADRA2C/SLC6A3/C4…
GO:0030534	adult behavior	30/2341	30	BP	137/17910	0.00283875	0.0245384	DBH/SEPTIN5/SPTBN2/SHANK1/GHRL/CSTB/CHRNA3/CXCL12/EPHA4/ATP6V1B1/NTF4/SHANK2/PPP1R1B/CRHBP/CHRNB4/EFNB3/GRIN1/UCHL1/SLC10A4/PAX5/NRXN3/DMBX1/CHRNB2/CEND1/NRXN1/LEP/NTSR1/KCNJ10/DAB1/CHRNA4
GO:0051346	negative regulation of hydrolase activity	75/2341	75	BP	420/17910	0.0028503	0.0246133	TNFAIP8/GZMA/SLPI/IFIT1/NAIP/SFN/PI3/RHOH/PPP1R2P1/NCKAP1L/CD27/SEMA4D/TNFSF14/PPP1R14B/CAMSAP3/GPSM1/ELFN2/TNF/CR1/LRRK2/SPINK5/A2ML1/KLRK1/CST6/CST7/LAMP3/NLRP7/SPOCK2/ANXA8/IFI6/CARD17/PPP1R14A/COL4A3/WFDC1/CPAMD8/CSTB/C4B/SERPINB3/BST2/TMEM132D/CSTA/NOS3/HMSD/APOA1/LMTK3/IQGAP2/TNNT2/PPP1R1B/WFDC2/SH3RF2/GPC3/SERPINB9/PLN/SERPINB13/C3/CST2/CCDC8/SPINT1/FZD10/KLRC4-KLRK1/PCSK1N/WFIKKN2/TFAP2B/…
GO:0045670	regulation of osteoclast differentiation	17/2341	17	BP	64/17910	0.00285444	0.0246243	IFNG/LILRB1/TLR3/TLR4/CCR1/IL12B/TNF/LILRB4/INPP5D/LILRB3/CSF1/TYROBP/CCL3/IL23R/TNFSF11/POU4F1/IL20
GO:1901222	regulation of NIK/NF-kappaB signaling	26/2341	26	BP	114/17910	0.00292469	0.0252048	PTPN22/CYLD/TLR7/NLRC3/TLR3/HAVCR2/TLR4/TLR2/CD27/TNFSF14/IL12B/RPS3/TNF/TMSB4X/NLRP3/TLR6/IL18/IL18R1/PTP4A3/TNFSF15/NOD2/LGALS9/IL1B/CHI3L1/CCL19/BMP7
GO:0019886	antigen processing and presentation of exogenous peptide antigen via MHC class II	23/2341	23	BP	97/17910	0.00294807	0.0253807	CTSS/HLA-DOA/HLA-DRA/LAG3/AP1M2/HLA-DMB/HLA-DPA1/HLA-DRB1/HLA-DQA2/HLA-DPB1/HLA-DOB/HLA-DQA1/CD74/HLA-DQB1/HLA-DMA/SPTBN2/HLA-DRB5/LGMN/IFI30/KIF26A/HLA-DQB2/FCGR2B/CTSE
GO:1902622	regulation of neutrophil migration	11/2341	11	BP	34/17910	0.00297169	0.0255583	NCKAP1L/C3AR1/XCL1/SLAMF8/CD74/RAC2/ADAM8/CXCR2/RIPOR2/CCR7/CCL19
GO:0006836	neurotransmitter transport	47/2341	47	BP	241/17910	0.00300615	0.0257238	LILRB1/GRIN3A/LYN/BTK/RAB3A/CPLX1/LRRK2/SLC1A6/NCS1/KMO/SEPTIN5/SLC6A14/PRKCB/SLC6A11/ASIC1/SLC29A2/CHRNA6/BAIAP3/GPER1/CHRNA3/SLC1A3/P2RX1/TNFSF11/APBA2/SYN2/SLC6A17/CHRNB4/HRH3/SLC6A7/CNR1/SLC6A3/SLC10A4/SYT9/TH/HBB/CHRNB2/RIMS4/WNT7A/SNAP25/NRXN1/NOS1/CACNA1B/RPH3A/NTSR1/KCNJ10/CHRNA4/RIMS2
GO:0002423	natural killer cell mediated immune response to tumor cell	5/2341	5	BP	9/17910	0.00303004	0.0257238	CRTAM/CD226/HAVCR2/IL12B/CD160
GO:0002855	regulation of natural killer cell mediated immune response to tumor cell	5/2341	5	BP	9/17910	0.00303004	0.0257238	CRTAM/CD226/HAVCR2/IL12B/CD160
GO:0002934	desmosome organization	5/2341	5	BP	9/17910	0.00303004	0.0257238	NECTIN1/DSP/JUP/PKP3/GRHL1
GO:0038155	interleukin-23-mediated signaling pathway	5/2341	5	BP	9/17910	0.00303004	0.0257238	JAK2/STAT4/IL12RB1/IL12B/IL23R
GO:0042492	gamma-delta T cell differentiation	5/2341	5	BP	9/17910	0.00303004	0.0257238	PTPRC/NCKAP1L/GPR18/JAG2/CCR9
GO:0043379	memory T cell differentiation	5/2341	5	BP	9/17910	0.00303004	0.0257238	IL12RB1/IL12B/IFNL1/TNFSF4/IL23R
GO:0051133	regulation of NK T cell activation	5/2341	5	BP	9/17910	0.00303004	0.0257238	IL12B/RASAL3/IL18/CD300A/IL23R
GO:0060556	regulation of vitamin D biosynthetic process	5/2341	5	BP	9/17910	0.00303004	0.0257238	IFNG/TNF/GFI1/SNAI1/IL1B
GO:0061004	pattern specification involved in kidney development	5/2341	5	BP	9/17910	0.00303004	0.0257238	IRX3/IRX2/IRX1/OSR1/PAX2
GO:0072048	renal system pattern specification	5/2341	5	BP	9/17910	0.00303004	0.0257238	IRX3/IRX2/IRX1/OSR1/PAX2
GO:0072608	interleukin-10 secretion	5/2341	5	BP	9/17910	0.00303004	0.0257238	CD274/LILRB1/ISG15/LGALS9/LILRA5
GO:0090715	immunological memory formation process	5/2341	5	BP	9/17910	0.00303004	0.0257238	IL12RB1/IL12B/IFNL1/TNFSF4/IL23R
GO:0010524	positive regulation of calcium ion transport into cytosol	15/2341	15	BP	54/17910	0.00309773	0.0262463	CXCL10/CXCL11/CXCL9/XCL1/P2RY6/CD4/GPER1/CD19/ADCYAP1R1/HAP1/GRIN1/IL13/NTSR1/TRDN/F2
GO:0046173	polyol biosynthetic process	15/2341	15	BP	54/17910	0.00309773	0.0262463	GCH1/PLEK/CD244/ISYNA1/IMPA2/P2RY6/PTAFR/ACER1/PTH1R/GPER1/PCK1/ITPKA/ADCYAP1R1/LEP/NTSR1
GO:0002335	mature B cell differentiation	9/2341	9	BP	25/17910	0.00312241	0.0263509	DOCK11/PLCL2/GPR183/SLAMF8/POU2F2/PLCG2/FCGR2B/CD19/ITM2A
GO:0060330	regulation of response to interferon-gamma	9/2341	9	BP	25/17910	0.00312241	0.0263509	STAT1/PARP14/PARP9/IFNG/NLRC5/JAK2/ARG1/SOCS1/TXK
GO:0060334	regulation of interferon-gamma-mediated signaling pathway	9/2341	9	BP	25/17910	0.00312241	0.0263509	STAT1/PARP14/PARP9/IFNG/NLRC5/JAK2/ARG1/SOCS1/TXK
GO:2000482	regulation of interleukin-8 secretion	9/2341	9	BP	25/17910	0.00312241	0.0263509	PTPN22/CD2/TLR2/TLR1/CD244/TMSB4X/FCN1/TLR6/LGALS9
GO:0033003	regulation of mast cell activation	12/2341	12	BP	39/17910	0.00312791	0.0263713	CD84/CD226/LYN/CD300A/MILR1/CD300LF/RAC2/LGALS9/CNR2/CNR1/TSLP/IL13
GO:0048729	tissue morphogenesis	107/2341	107	BP	635/17910	0.00313846	0.0264342	STAT1/CXCL10/KRT17/PSMB9/FLG2/PSMB8/GCNT1/PSME2/KRT16/ESRP2/MYBPC3/TACSTD2/CAMSAP3/DSP/KRT6A/JAG2/SEMA4C/TNF/FOXQ1/CSF1R/RDH10/AJAP1/PSMB10/SCX/CSF1/NKD1/ETV2/KDF1/RSPO3/IRX3/WNT11/ASTN2/FGF1/GRHL2/WNT3A/GRHL3/SERPINB5/PTK7/WNT6/HOXA11/EOMES/FRZB/ESR1/LGR5/KLK14/OVOL2/SULF1/TCF15/TBX4/RASIP1/NOS3/TBX1/NFATC4/FGFR2/BRSK2/CXCR4/NDRG4/TGM3/EPHA4/CA9/CARMIL2/SOX11/WNT7B/WNT3/FOXH1/SNAI1/TP63/TNNT2/CX…
GO:0030662	coated vesicle membrane	35/2436	35	CC	169/18675	0.00347098	0.0264951	B2M/CD3G/FCGR1B/HLA-B/HLA-DRA/FCGR1A/HLA-F/HLA-C/AP1M2/HLA-E/IL7R/HLA-DPA1/HLA-DRB1/CD3D/RAB3A/HLA-DQA2/HLA-DPB1/HLA-DQA1/CD74/REEP6/HLA-DQB1/HLA-DRB5/CNIH2/HLA-H/APOB/ADCY8/CD4/EREG/HLA-DQB2/CD207/CFTR/HLA-G/SYT9/LRP2/FOLR1
GO:0002534	cytokine production involved in inflammatory response	14/2341	14	BP	49/17910	0.00316863	0.0266621	IDO1/GBP5/ABCD2/NLRC3/CD96/TLR4/NLRP7/CD6/TLR6/NOD2/MEFV/NOS2/LEP/F2
GO:0004867	serine-type endopeptidase inhibitor activity	19/2173	19	MF	73/16967	0.00169127	0.0268993	SLPI/PI3/SPINK5/A2ML1/SERPING1/WFDC1/CPAMD8/SERPINB3/SERPINA1/HMSD/WFDC2/SERPINB9/SERPINB13/SPINT1/PCSK1N/WFIKKN2/SPINK1/ITIH5/AMBP
GO:0043548	phosphatidylinositol 3-kinase binding	10/2173	10	MF	28/16967	0.00170319	0.0268993	NLRC3/JAK2/PIK3AP1/LCK/FAM83A/CORO1A/HCST/AXL/FAM83B/DAB1
GO:0010952	positive regulation of peptidase activity	37/2341	37	BP	180/17910	0.0032022	0.026918	FASLG/TNFSF10/JAK2/LYN/EFNA3/NLRC4/RPS3/LCK/AIM2/TNF/CR1/S100A8/NDUFA13/FAS/S100A9/NLRP3/LGMN/TNFSF15/WNT3A/PRR7/MEFV/COL4A3/GPER1/SERPINB3/MAPK12/LGALS9/P2RX1/EPHA4/BOK/TTBK1/XDH/ST18/FOXL2/PERP/GRIN1/BCL2L10/NGFR
GO:0072009	nephron epithelium development	25/2341	25	BP	109/17910	0.00321557	0.0270038	STAT1/TACSTD2/IRX3/WNT11/FGF1/PTPRO/WNT6/HOXA11/FOXJ1/WNT7B/CD24/GPC3/WNT1/HOXD11/IRX2/TCF21/TFAP2B/GATA3/IRX1/WNT4/LIF/PROM1/OSR1/AGT/PAX2
GO:1904062	regulation of cation transmembrane transport	58/2341	58	BP	312/17910	0.00332574	0.0279017	CXCL10/CXCL11/CXCL9/IFNG/CTSS/CCR2/SLC8A1/CLIC2/PIK3CG/LYN/GLRX/GAL/XCL1/JPH3/STAC3/TMSB4X/CBARP/P2RY6/CCL2/SCN5A/CNIH2/SHANK1/PTPN6/CORO1A/EPO/KCNE1/CRHR1/KCNIP3/PLCG2/CHCHD10/GPER1/EDN3/KCNH2/CD19/KCNC1/PCSK9/KCNAB2/CRHBP/STAC2/PLN/HAP1/DPP6/GRIN1/KEL/WNK2/CACNG8/JPH4/GRIA4/CACNG4/MMP9/OSR1/DPP10/NOS1/IL13/AGT/NTSR1/TRDN/F2
GO:0006820	anion transport	93/2341	93	BP	542/17910	0.00333903	0.0279857	APOL1/CLIC2/PLA2G2D/CLCA2/ABCA12/RAB3A/TTYH3/PLA2G4F/SLC19A1/CLIC5/CPLX1/SLC1A6/SLC7A7/SLC27A4/KMO/PPARD/ARG1/ABCA4/P2RY6/SLC25A10/SLC27A2/ANO7/SLC27A5/SLCO4A1/CLDN4/ABCB11/CA4/SLC6A14/EMB/STARD10/PTAFR/SLC6A11/MIF/ABCB1/FABP3/MTTP/SLC2A1/TTYH1/GABRD/HBA2/SLC4A11/TCAF2/SLC26A9/CA13/SLC34A1/SLC1A3/SLC7A5/SLC4A3/ERFE/TNFSF11/CA9/APOA1/OCA2/SLC27A3/SLC13A5/SLC34A3/GRM7/SLC6A17/SLCO2B1/CFTR/RTBDN/SLC…
GO:0042599	lamellar body	7/2436	7	CC	17/18675	0.00374892	0.0282421	KRTDAP/ABCA12/KLK5/SPINK5/LAMP3/KLK7/SFTPC
GO:0030136	clathrin-coated vesicle	37/2436	37	CC	182/18675	0.0037615	0.0282421	CD3G/FCGR1B/HLA-DRA/FCGR1A/AP1M2/IL7R/HLA-DPA1/EPN3/HLA-DRB1/CD3D/RAB3A/HLA-DQA2/HLA-DPB1/HLA-DQA1/CD74/REEP6/HLA-DQB1/HLA-DRB5/SFTPD/DENND1B/ASTN2/APOB/ADCY8/CD4/SFTPC/EREG/HLA-DQB2/SLC2A4/CD207/CFTR/CTLA4/SYT9/ASTN1/LRP2/CPNE6/FOLR1/CLVS2
GO:0070588	calcium ion transmembrane transport	55/2341	55	BP	293/17910	0.00337309	0.0282435	CXCL10/CXCL11/CXCL9/PTPRC/FASLG/CCR5/GRIN3A/SLC8A1/P2RY12/CLIC2/PIK3CG/LYN/LCK/XCL1/JPH3/STAC3/CBARP/NCS1/P2RY6/MCUB/PTPN6/CORO1A/ASIC1/ITPR1/CACNA1H/WNT3A/CRHR1/CCL3/PLCG2/PKD1L3/BHLHA15/GPER1/CACNA1G/TPCN2/CACNA2D2/TRPV5/CHRNA9/CD19/STAC2/CCR7/PLN/SLC8A2/HAP1/GRIN1/CACNG8/JPH4/TRPM5/CACNG4/NOS1/IL13/CACNA1B/NTSR1/CCL19/TRDN/F2
GO:0050848	regulation of calcium-mediated signaling	23/2341	23	BP	98/17910	0.00338562	0.0282961	GBP1/TRAT1/PLEK/CCL4/CLIC2/SLA2/CMKLR1/JPH3/TNF/LRRK2/P2RY6/CD3E/ITPR1/CCL3/CD4/ZAP70/CDH13/PLN/HAP1/GPR143/JPH4/NOS1/TRDN
GO:0051345	positive regulation of hydrolase activity	114/2341	114	BP	684/17910	0.003386	0.0282961	IFNG/GPR65/PTPRC/FASLG/RGS18/TNFSF10/CCL5/PLEK/CXCL13/ITK/RASGRP1/FCRL3/JAK2/TAGAP/P2RY12/LYN/EFNA3/NLRC4/DOCK2/DOCK8/NCKAP1L/ARHGAP25/ARHGAP9/DOCK11/ARHGAP15/SEMA4D/ARHGDIG/ARHGAP30/ARHGAP18/RAB3A/RPS3/ARAP2/MYBPC3/VAV1/LCK/AIM2/TNF/CR1/TMSB4X/S100A8/LRRK2/NDUFA13/FAS/S100A9/ACAP1/NLRP3/RASAL3/P2RY6/ARHGDIB/LGMN/CD33/PTAFR/ADAP2/CD300A/DENND1B/WNT11/TNFSF15/FGFR3/PLEKHG6/RTN4R/LMF1/WNT3A/GRHL3/R…
GO:0017157	regulation of exocytosis	38/2341	38	BP	187/17910	0.00349401	0.028792	IFNG/GRIN3A/CCR2/CD84/LYN/HLA-F/RAB3A/CPLX1/LRRK2/CBARP/NCS1/SEPTIN5/PRKCB/PTAFR/CD300A/VSNL1/ITGB2/ITGAM/CHRNA6/BAIAP3/LGI3/SDC1/RAC2/LGALS9/FCGR2B/P2RX1/PRAM1/APBA2/CFTR/HAP1/CNR1/SYT9/CHRNB2/RIMS4/WNT7A/IL13/CHRNA4/RIMS2
GO:0098773	skin epidermis development	21/2341	21	BP	87/17910	0.00349776	0.028792	KRT17/GAL/APCDD1/TNF/FOXQ1/SPINK5/KDF1/FERMT1/CDH3/LGR5/FGFR2/DNASE1L2/TGM3/SNAI1/TP63/WNT10B/SOX21/MSX2/FOXE1/FGF7/SOSTDC1
GO:0002759	regulation of antimicrobial humoral response	4/2341	4	BP	6/17910	0.00350596	0.028792	ACOD1/KLK5/SPINK5/KLK7
GO:0002885	positive regulation of hypersensitivity	4/2341	4	BP	6/17910	0.00350596	0.028792	HLA-E/BTK/CCR7/C3
GO:0002924	negative regulation of humoral immune response mediated by circulating immunoglobulin	4/2341	4	BP	6/17910	0.00350596	0.028792	CR1/PTPN6/FOXJ1/FCGR2B
GO:0010536	positive regulation of activation of Janus kinase activity	4/2341	4	BP	6/17910	0.00350596	0.028792	CCL5/IL12B/IL23R/AGT
GO:0032687	negative regulation of interferon-alpha production	4/2341	4	BP	6/17910	0.00350596	0.028792	NMI/NLRC3/HAVCR2/IL10
GO:0033634	positive regulation of cell-cell adhesion mediated by integrin	4/2341	4	BP	6/17910	0.00350596	0.028792	CCL5/CXCL13/CD3E/SKAP1
GO:0035701	hematopoietic stem cell migration	4/2341	4	BP	6/17910	0.00350596	0.028792	PTPRC/CCR2/BCL11B/KIT
GO:0043382	positive regulation of memory T cell differentiation	4/2341	4	BP	6/17910	0.00350596	0.028792	IL12RB1/IL12B/TNFSF4/IL23R
GO:0046645	positive regulation of gamma-delta T cell activation	4/2341	4	BP	6/17910	0.00350596	0.028792	PTPRC/LILRB1/NCKAP1L/NOD2
GO:0072679	thymocyte migration	4/2341	4	BP	6/17910	0.00350596	0.028792	CCR2/XCL1/CCR6/ADAM8
GO:0097527	necroptotic signaling pathway	4/2341	4	BP	6/17910	0.00350596	0.028792	FASLG/TLR3/TNF/FAS
GO:1904304	regulation of gastro-intestinal system smooth muscle contraction	4/2341	4	BP	6/17910	0.00350596	0.028792	PTAFR/GHRL/KIT/NMU
GO:1904306	positive regulation of gastro-intestinal system smooth muscle contraction	4/2341	4	BP	6/17910	0.00350596	0.028792	PTAFR/GHRL/KIT/NMU
GO:2000328	regulation of T-helper 17 cell lineage commitment	4/2341	4	BP	6/17910	0.00350596	0.028792	TBX21/IL12RB1/IL12B/IL23R
GO:2001188	regulation of T cell activation via T cell receptor contact with antigen bound to MHC molecule on antigen presenting cell	4/2341	4	BP	6/17910	0.00350596	0.028792	LILRB1/HAVCR2/HLA-DMB/LGALS9
GO:2001199	negative regulation of dendritic cell differentiation	4/2341	4	BP	6/17910	0.00350596	0.028792	LILRB1/TMEM176B/FCGR2B/HLA-G
GO:0015837	amine transport	19/2341	19	BP	76/17910	0.00351859	0.0288603	P2RY12/KMO/ARG1/RHCG/CHRNA6/CHRNA3/CXCL12/GRM7/SLC38A3/CNR1/ADRA2C/OXT/TH/CHRNB2/OSR1/LEP/AGT/NTSR1/CHRNA4
GO:0035455	response to interferon-alpha	8/2341	8	BP	21/17910	0.00352364	0.0288603	IFIT3/IFIT2/PYHIN1/IFITM1/LAMP3/BST2/AXL/GATA3
GO:0015711	organic anion transport	76/2341	76	BP	430/17910	0.00352441	0.0288603	PLA2G2D/ABCA12/RAB3A/PLA2G4F/SLC19A1/CPLX1/SLC1A6/SLC7A7/SLC27A4/KMO/PPARD/ARG1/ABCA4/SLC25A10/SLC27A2/SLC27A5/SLCO4A1/ABCB11/CA4/SLC6A14/EMB/STARD10/SLC6A11/MIF/ABCB1/FABP3/MTTP/SLC2A1/HBA2/SLC4A11/SLC26A9/CA13/SLC1A3/SLC7A5/SLC4A3/ERFE/TNFSF11/CA9/APOA1/OCA2/SLC27A3/SLC13A5/GRM7/SLC6A17/SLCO2B1/CFTR/RTBDN/SLC7A2/SLC6A7/SLC38A3/NOS2/SLC10A6/IL1B/SLC7A10/ATP8A2/SLC26A10/HBA1/AGXT/OXT/LCN1/SLC27A6…
GO:0021772	olfactory bulb development	10/2341	10	BP	30/17910	0.0035685	0.0291655	LRRK2/CSF1R/DLX2/DLX5/EOMES/EFNA2/FEZF1/ARX/ROBO2/NR2E1
GO:0034694	response to prostaglandin	10/2341	10	BP	30/17910	0.0035685	0.0291655	PTGER2/PTGDR/P2RY6/TNFSF4/APOB/PTGFR/AKR1C2/CCR7/OXT/CCL19
GO:0030324	lung development	35/2341	35	BP	169/17910	0.00358253	0.0292522	PHEX/ABCA12/HSD11B1/RAB3A/ESRP2/EIF4EBP1/TNF/RDH10/ARG1/ID1/SFTPD/WNT11/FGF1/GRHL2/PTK7/CCBE1/FOXJ1/TBX4/NOS3/FGFR2/SOX11/WNT7B/DHCR7/EDN2/GPC3/SIM2/FGF7/TCF21/TBX5/CHI3L1/LIF/FOXA1/RBP4/AGR2/IL13
GO:0042133	neurotransmitter metabolic process	31/2341	31	BP	145/17910	0.0035887	0.0292746	GCH1/IFNG/JAK2/AIF1/TLR4/TLR2/DPYD/TNF/KLRK1/TLR6/ITGB2/CYP1B1/SLC1A3/NOS3/CX3CR1/IL10/ASS1/SLC7A2/NOS2/IL1B/SLC6A3/KLRC4-KLRK1/PTX3/AGXT/ENPP6/PHGDH/TH/HBB/GLDC/NOS1/AGT
GO:0016701	oxidoreductase activity, acting on single donors with incorporation of molecular oxygen	9/2173	9	MF	24/16967	0.00195272	0.0301846	IDO1/IDO2/ALOX12B/ALOXE3/ALOX5/HPDL/TDO2/P4HA3/ALOX15
GO:0015318	inorganic molecular entity transmembrane transporter activity	104/2173	104	MF	619/16967	0.00204087	0.0301846	APOL1/GRIN3A/SLC8A1/SLC9A9/CLCA2/SLC12A3/TTYH3/SLC40A1/SLC15A1/SLC19A1/CLIC5/MTCO2P12/SLC1A6/SLC25A1/SLC39A4/SCNN1A/NCS1/SLC25A10/ANO7/SCN5A/CLDN4/ABCB11/SLC6A14/SLC31A2/COX4I2/ASIC1/KCNE1/ITPR1/CACNA1H/AQP5/KCNQ2/KCNK7/KCNIP3/PKD1L3/CHRNA6/SLC39A2/TTYH1/GABRD/TFR2/GRID1/SLC4A11/CACNA1G/CHRNA3/TPCN2/SLC26A9/SCNN1G/SLC34A1/SLC1A3/SLC7A5/SLC4A3/P2RX1/ATP6V1B1/TRPV5/OCA2/CHRNA9/KCNH2/KCNC1/SLC13A5/S…
GO:0001730	2'-5'-oligoadenylate synthetase activity	3/2173	3	MF	3/16967	0.00209817	0.0301846	OAS2/OAS1/OAS3
GO:0004517	nitric-oxide synthase activity	3/2173	3	MF	3/16967	0.00209817	0.0301846	NOS3/NOS2/NOS1
GO:0004911	interleukin-2 receptor activity	3/2173	3	MF	3/16967	0.00209817	0.0301846	IL2RA/IL2RB/IL2RG
GO:0019862	IgA binding	3/2173	3	MF	3/16967	0.00209817	0.0301846	JCHAIN/FCAR/AMBP
GO:0031720	haptoglobin binding	3/2173	3	MF	3/16967	0.00209817	0.0301846	HBA2/HBA1/HBB
GO:0031735	CCR10 chemokine receptor binding	3/2173	3	MF	3/16967	0.00209817	0.0301846	CXCL13/CCL25/CCL19
GO:0042010	interleukin-15 receptor activity	3/2173	3	MF	3/16967	0.00209817	0.0301846	IL15RA/IL2RB/IL2RG
GO:0030299	intestinal cholesterol absorption	6/2341	6	BP	13/17910	0.00373785	0.0303177	CEL/APOA1/NPC1L1/ABCG8/LEP/APOA2
GO:0030656	regulation of vitamin metabolic process	6/2341	6	BP	13/17910	0.00373785	0.0303177	IFNG/TNF/RDH10/GFI1/SNAI1/IL1B
GO:0033623	regulation of integrin activation	6/2341	6	BP	13/17910	0.00373785	0.0303177	PTGER4/PLEK/CXCL13/P2RY12/RASIP1/SKAP1
GO:0035723	interleukin-15-mediated signaling pathway	6/2341	6	BP	13/17910	0.00373785	0.0303177	IL15RA/IL2RB/IL15/IL2RG/JAK3/CD4
GO:0043374	CD8-positive, alpha-beta T cell differentiation	6/2341	6	BP	13/17910	0.00373785	0.0303177	IRF1/NCKAP1L/GPR18/SOCS1/EOMES/PAX1
GO:0071350	cellular response to interleukin-15	6/2341	6	BP	13/17910	0.00373785	0.0303177	IL15RA/IL2RB/IL15/IL2RG/JAK3/CD4
GO:0032722	positive regulation of chemokine production	15/2341	15	BP	55/17910	0.00375419	0.0303582	TLR7/TLR3/HAVCR2/AIF1/TLR4/IL7/TLR2/TNF/CSF1R/CD74/IL33/MIF/LGALS9/IL1B/TSLP
GO:0090596	sensory organ morphogenesis	48/2341	48	BP	250/17910	0.00376171	0.0303582	FASLG/NECTIN1/PRDM1/USH1G/MYO7A/LRP5/TIFAB/TULP1/NKD1/WNT3A/AQP5/GRHL3/DLX5/IRX5/PTK7/MFAP2/FRZB/OTX1/TBX1/FGFR2/ATP6V1B1/SOX11/CHRNA9/HMX2/FBN2/GSC/RIPOR2/FOXL2/IHH/WNT1/DLX6/FOXF2/GBX2/TFAP2B/ATP8A2/GATA3/HOXA2/KCNQ4/TH/PROM1/GJB6/OSR1/FOXN4/RBP4/SDK2/PAX2/BMP7/MYO3A
GO:1903556	negative regulation of tumor necrosis factor superfamily cytokine production	18/2341	18	BP	71/17910	0.00377821	0.0303582	CD274/PTPN22/LILRB1/NLRC3/SLAMF1/HAVCR2/TLR4/GPR18/CLEC4A/MC1R/CD33/PTPN6/GSTP1/GHRL/LGALS9/IL10/AXL/CIDEA
GO:0002418	immune response to tumor cell	7/2341	7	BP	17/17910	0.00379255	0.0303582	CD274/CRTAM/CD226/PRF1/HAVCR2/IL12B/CD160
GO:0010744	positive regulation of macrophage derived foam cell differentiation	7/2341	7	BP	17/17910	0.00379255	0.0303582	MSR1/PRKCH/CSF1/IL18/APOB/PF4/AGT
GO:0043373	CD4-positive, alpha-beta T cell lineage commitment	7/2341	7	BP	17/17910	0.00379255	0.0303582	TBX21/SLAMF6/IL12RB1/IL12B/SPN/LY9/IL23R
GO:0044110	growth involved in symbiotic interaction	7/2341	7	BP	17/17910	0.00379255	0.0303582	IRF8/IL12B/TNF/LTA/IL10/CTSG/MBL2
GO:0044116	growth of symbiont involved in interaction with host	7/2341	7	BP	17/17910	0.00379255	0.0303582	IRF8/IL12B/TNF/LTA/IL10/CTSG/MBL2
GO:0044241	lipid digestion	7/2341	7	BP	17/17910	0.00379255	0.0303582	CEL/APOA1/ARX/NPC1L1/ABCG8/LEP/APOA2
GO:0070233	negative regulation of T cell apoptotic process	7/2341	7	BP	17/17910	0.00379255	0.0303582	IDO1/CCL5/DOCK8/IL7R/CD27/PRKCQ/JAK3
GO:0090185	negative regulation of kidney development	7/2341	7	BP	17/17910	0.00379255	0.0303582	STAT1/TACSTD2/GATA3/MMP9/OSR1/PAX2/BMP7
GO:1903975	regulation of glial cell migration	7/2341	7	BP	17/17910	0.00379255	0.0303582	CCR2/P2RY12/STAP1/GPR183/CSF1/CCL3/CX3CR1
GO:1903980	positive regulation of microglial cell activation	7/2341	7	BP	17/17910	0.00379255	0.0303582	STAP1/LRRK2/C1QA/ITGB2/CCL3/ITGAM/TTBK1
GO:1905331	negative regulation of morphogenesis of an epithelium	7/2341	7	BP	17/17910	0.00379255	0.0303582	STAT1/TACSTD2/TNF/NKD1/SULF1/GATA3/BMP7
GO:0007610	behavior	98/2341	98	BP	578/17910	0.00379647	0.0303611	IDO1/LILRB2/B4GALT2/CPEB3/TLR2/DDO/GAL/CLN6/JPH3/DBH/LRRK2/APRT/KLK8/TIFAB/SEPTIN5/SPTBN2/SHANK1/PMCH/LGMN/ASIC1/USP2/GJB4/ARC/OLFM2/CCL3/PRKAR1B/MMP17/RIN1/SELENOP/ADCY8/GHRL/CSTB/GABRA5/NPW/GRID1/FZD9/BRINP1/CHRNA3/SLC1A3/CXCL12/TCF15/TBX1/NFATC4/NPAS1/ESPN/NDRG4/EPHA4/ATP6V1B1/NTF4/GPR88/C1QL1/CX3CR1/TTBK1/APBA2/SHANK2/REN/CUX2/PPP1R1B/CRHBP/KIT/NMU/CHRNB4/EFNB3/SLC8A2/GRIN1/CNR1/SLC6A3/FOXO6/…
GO:0042327	positive regulation of phosphorylation	153/2341	153	BP	955/17910	0.0038274	0.0305798	PARP14/PARP9/IFNG/PTPN22/PTPRC/CD80/CCL5/RASGRP1/FCRL3/SLAMF1/TLR3/JAK2/P2RY12/PIK3CG/LYN/PROM2/HAVCR2/AIF1/FCGR1A/ALOX12B/FPR2/TLR4/NCKAP1L/UBA52/MLKL/SCIMP/IL15/CASS4/CD27/SEMA4D/MLST8/FGD2/CCR1/BANK1/IL12B/RPS3/HCLS1/STAP1/GPR183/FLT3/FFAR4/LCP2/S100A7/SEMA4C/TNF/LRRK2/CSF1R/NECAB2/KNDC1/CD74/FAS/P2RY6/CSF1/SOCS1/CRLF1/TLR6/IL18/IFNL1/PRR5/TNFSF18/CD3E/CD300A/EPO/WNT11/TNFSF15/FGFR3/FGF1/IRAK2…
GO:0035176	social behavior	14/2341	14	BP	50/17910	0.00388107	0.0309508	SEPTIN5/SHANK1/GRID1/BRINP1/TBX1/CX3CR1/SHANK2/GRIN1/OXT/NRXN3/TH/CHRNB2/NRXN1/NR2E1
GO:0051703	intraspecies interaction between organisms	14/2341	14	BP	50/17910	0.00388107	0.0309508	SEPTIN5/SHANK1/GRID1/BRINP1/TBX1/CX3CR1/SHANK2/GRIN1/OXT/NRXN3/TH/CHRNB2/NRXN1/NR2E1
GO:0036477	somatodendritic compartment	119/2436	119	CC	724/18675	0.00419804	0.0312634	STAT1/CYBB/GRIN3A/CCR2/SLC8A1/TBX21/NSMF/AIF1/XRN1/DDN/CPEB3/RPL28/CCR4/NECTIN1/TENM2/GAL/IGSF9/ENDOG/CPLX1/LRRK2/NECAB2/KNDC1/ERMN/RAC3/NDUFS7/NCS1/ARG1/DBN1/SPTBN2/CNIH2/SHANK1/TNFRSF1B/CD3E/TMPRSS3/DPYSL5/RTN4R/ASTN2/PTPRO/APOB/ARC/ZNF804A/PRR7/KCNIP3/RIN1/ADCY8/TUBB4A/GPER1/TTLL7/GABRA5/GNG3/CHRNA3/C4B/SLC1A3/PALM/FCGR2B/OLFM1/RTN4RL2/EEF1A2/NCF1/EPHA4/DNER/ATCAY/RBFOX3/LMTK3/PDE9A/ITPKA/CX3C…
GO:0051281	positive regulation of release of sequestered calcium ion into cytosol	12/2341	12	BP	40/17910	0.0039458	0.0314353	CXCL10/CXCL11/CXCL9/XCL1/P2RY6/GPER1/CD19/HAP1/IL13/NTSR1/TRDN/F2
GO:0002448	mast cell mediated immunity	13/2341	13	BP	45/17910	0.00395286	0.0314353	RASGRP1/CD84/PIK3CG/LYN/BTK/LAT2/CD300A/MILR1/RAC2/LGALS9/KIT/SERPINB9/IL13
GO:0033628	regulation of cell adhesion mediated by integrin	13/2341	13	BP	45/17910	0.00395286	0.0314353	CCL5/CXCL13/P2RY12/PIK3CG/LYN/NCKAP1L/RAC3/CD3E/FERMT1/PTPN6/CYP1B1/SKAP1/EPHA8
GO:0043025	neuronal cell body	79/2436	79	CC	454/18675	0.00429356	0.031556	CYBB/GRIN3A/CCR2/TBX21/NSMF/AIF1/XRN1/DDN/CCR4/GAL/ENDOG/CPLX1/LRRK2/KNDC1/ERMN/RAC3/NDUFS7/ARG1/SPTBN2/TNFRSF1B/TMPRSS3/DPYSL5/RTN4R/ASTN2/APOB/ARC/ZNF804A/RIN1/ADCY8/TUBB4A/TTLL7/GABRA5/CHRNA3/SLC1A3/OLFM1/RTN4RL2/EEF1A2/NCF1/EPHA4/DNER/RBFOX3/PDE9A/CX3CR1/TTBK1/EFNA2/KCNC1/SHANK2/PPP1R1B/CRHBP/KCNK1/CNR2/ASS1/NEURL1/PTPRN/SLC8A2/ADRA2C/SLC6A3/C4A/IGSF9B/FRMD7/UCHL1/GLRA3/ASTN1/CYGB/GRIA4/STMN2…
GO:0098794	postsynapse	96/2436	96	CC	568/18675	0.00430622	0.031556	GRIN3A/JAK2/SLC8A1/LYN/NSMF/RPL18A/RPL8/DDN/CPEB3/RPS19/TENM2/RPS3/RPL12/EIF4EBP1/SEMA4C/C1QC/CPLX1/LRRK2/NCS1/C1QB/DBN1/LRFN1/SPTBN2/LRFN4/CNIH2/SHANK1/DCC/C1QA/SLC6A11/CD3E/ITPR1/KCNA3/PTPRO/ARC/ZNF804A/SH3GL3/PRR7/APC2/FABP5/ADCY8/GHRL/CHRNA6/GPER1/GABRA5/GABRD/GRID1/FZD9/GNG3/CHRNA3/PALM/FCGR2B/LRRTM2/P2RX1/EPHA4/DMTN/CHRNA9/ITPKA/LHFPL4/KCNC1/SHANK2/CBLN1/PPP1R1B/KCNAB2/SYN2/GRM7/FXYD6/CHRNB…
GO:0042981	regulation of apoptotic process	232/2341	232	BP	1512/17910	0.00398939	0.0316964	STAT1/CXCL10/IDO1/CD274/UBD/IFNG/IFIT3/IFIT2/PTPRC/BIRC3/FASLG/CYLD/MNDA/CCR5/LILRB1/CD3G/BCL2L14/CD38/TNFSF10/CCL5/SOD2/TNFAIP8/GZMA/IKZF3/TLR3/JAK2/SP100/GIMAP8/PIK3CG/LYN/NAIP/EVI2B/NUGGC/NLRC4/NSMF/CD28/AIF1/SFN/DOCK8/IL7/NCKAP1L/IL7R/IL2RB/UBA52/PDCD1/BTK/GZMB/CD27/NAT8B/SEMA4D/FGD2/TNFSF14/IL12B/RPS3/GAL/VNN1/HCLS1/STK17B/VAV1/SLC40A1/LCK/FLT3/PLAC8/FFAR4/CD160/CASP10/TP53AIP1/TNF/PRKCQ/DBH…
GO:0016502	nucleotide receptor activity	7/2173	7	MF	16/16967	0.00222739	0.0317293	P2RY10/P2RY12/P2RY14/P2RY8/P2RY6/P2RX1/P2RY2
GO:0030198	extracellular matrix organization	61/2341	61	BP	334/17910	0.00401325	0.0318564	CTSS/VCAM1/BSG/ITGAD/LCP1/TNF/ITGAL/SPINK5/CAPNS2/SCX/KLK7/TNFRSF1B/MMP10/FERMT1/SPOCK2/ITGB2/WNT3A/CYP1B1/ITGB7/SERPINB5/HAS3/ITGAM/COL4A3/MFAP2/COL4A6/ELF3/ICAM3/SULF1/ABI3BP/LAMC3/ACAN/TCF15/COL4A4/SH3PXD2B/CARMIL2/ADAM8/ITGB6/FBN2/FGFR4/SCUBE3/IHH/FSCN1/COL9A3/SPINT1/FOXF2/ICAM5/ADAMTS3/PTX3/LAMC2/MMP2/TLL1/ITGB8/MMP9/GAS2/BCAN/HAPLN1/CTSG/AGT/COMP/CMA1/NR2E1
GO:0051962	positive regulation of nervous system development	89/2341	89	BP	519/17910	0.00409817	0.0325002	CCR2/P2RY12/LYN/NSMF/NEUROG3/CPEB3/TLR2/SEMA4D/DUOXA1/SF3A2/TNF/CST7/S100A9/PRKCH/DBN1/CSF1/CRABP2/LTA/SHANK1/IRX3/C1QA/TNFRSF1B/DLX2/EPO/WNT3A/ZNF804A/SH3GL3/CCL3/PTK7/GHRL/GPER1/PTK6/ADGRB2/RASSF10/CXCL12/LRRTM2/CXCR4/NDRG4/EPHA4/GPC2/DMRTA2/SOX11/ITPKA/CX3CR1/WNT3/TTBK1/SYT3/CUX2/CBLN1/PACSIN1/PLK5/DLX1/FEZF1/KIT/NEURL1/NKX2-2/HAP1/ADGRB1/SPINT1/CNR1/IL1B/ADRA2C/RND2/LRRC4B/FOXO6/ATP8A2/OXT/AS…
GO:0072088	nephron epithelium morphogenesis	19/2341	19	BP	77/17910	0.00411067	0.0325691	STAT1/TACSTD2/IRX3/WNT11/FGF1/WNT6/HOXA11/GPC3/WNT1/HOXD11/IRX2/TCF21/GATA3/IRX1/WNT4/LIF/OSR1/AGT/PAX2
GO:0031344	regulation of cell projection organization	106/2341	106	BP	634/17910	0.00417814	0.0330731	B2M/CYLD/CD38/P2RY12/LYN/PROM2/NSMF/NEUROG3/DOCK11/CPEB3/SEMA4D/TENM2/RAB8B/TACSTD2/STAP1/SF3A2/LRRK2/KLK8/KNDC1/S100A9/ERMN/EPS8L1/PPP1R16B/NCS1/DBN1/ID1/CRABP2/SHANK1/DCC/EPO/RTN4R/KLK6/WNT3A/PTPRO/ARC/ZNF804A/WAS/CDC42EP5/PTK7/GFI1/FAM110C/KLF5/MAPK15/PTK6/NGEF/CHRNA3/RAC2/PALM/FCGR2B/OLFM1/RTN4RL2/CXCL12/NFATC4/ESPN/BRSK2/CXCR4/NDRG4/EPHA4/DMTN/GPC2/CARMIL2/ITPKA/EPS8L2/WNT3/SYT3/LCN2/CUX2/PA…
GO:0002360	T cell lineage commitment	9/2341	9	BP	26/17910	0.00422908	0.0333836	CYLD/TBX21/SLAMF6/IL7/IL12RB1/IL12B/SPN/LY9/IL23R
GO:0034114	regulation of heterotypic cell-cell adhesion	9/2341	9	BP	26/17910	0.00422908	0.0333836	LCK/TNF/APOA1/CEACAM6/IL10/SKAP1/IL1B/ALOX15/BMP7
GO:0060706	cell differentiation involved in embryonic placenta development	9/2341	9	BP	26/17910	0.00422908	0.0333836	PRDM1/GJB5/ASCL2/GRHL2/EOMES/SNAI1/KRT19/MDFI/LIF
GO:0043062	extracellular structure organization	69/2341	69	BP	387/17910	0.00424672	0.0334919	CTSS/VCAM1/BSG/ITGAD/LCP1/TNF/ITGAL/SPINK5/CAPNS2/SCX/KLK7/TNFRSF1B/MMP10/FERMT1/SPOCK2/ITGB2/WNT3A/APOB/CYP1B1/ITGB7/SERPINB5/HAS3/ITGAM/COL4A3/MFAP2/MTTP/COL4A6/ELF3/ALB/SDC1/ICAM3/SULF1/ABI3BP/LAMC3/ACAN/TCF15/COL4A4/SH3PXD2B/CARMIL2/APOA1/ADAM8/ITGB6/FBN2/FGFR4/SCUBE3/IHH/FSCN1/COL9A3/PLA2G7/SPINT1/FOXF2/ICAM5/ADAMTS3/PTX3/LAMC2/MMP2/TLL1/ITGB8/MMP9/GAS2/BCAN/HAPLN1/CTSG/AGT/APOA2/COMP/CMA1/B…
GO:0060759	regulation of response to cytokine stimulus	37/2341	37	BP	183/17910	0.00427128	0.0336545	STAT1/PARP14/IFIH1/PARP9/IFNG/PTPRC/BIRC3/CYLD/NLRC5/DDX58/SAMHD1/CCL5/JAK2/TLR4/IL7/TLR2/STAP1/TNF/USP18/CD74/AGPAT2/ARG1/CSF1/SOCS1/TICAM2/PTPN6/CD300LF/IRAK2/GSTP1/TXK/GFI1/PALM3/APOA1/CD24/IL36RN/AXL/TSLP
GO:0099146	intrinsic component of postsynaptic density membrane	14/2436	14	CC	51/18675	0.00463397	0.0336882	LRFN1/LRFN4/CNIH2/DCC/PTPRO/GRID1/LRRTM2/EFNB3/GRIN1/ADRA2C/PLPPR4/RGS7BP/CACNG4/CHRM1
GO:0042803	protein homodimerization activity	131/2173	131	MF	809/16967	0.00240767	0.0339645	GBP1/STAT1/GBP5/GBP4/GCH1/PTPRC/GIMAP7/GBP3/ABCD2/TAP1/GBP2/CD69/LILRB1/CD3G/CCL5/PLEK/CCR2/RASGRP1/CD2/GZMA/IKZF3/APOBEC3G/WARS1/NLRC4/LILRB2/IKZF2/JCHAIN/RPS19/CD3D/NECTIN1/IL12B/TENM2/DPYD/CD247/NAXE/FLT3/USH1G/XCL1/CLN6/MYO7A/S100P/LRRK2/CSF1R/KLRK1/CST7/CRYM/JAML/JUP/ABCG4/IMPA2/C1QB/CDA/CSF1/ID1/HSPB1/ADA2/CD3E/CORO1A/IRAK2/PTPRO/MGST1/SDCBP2/MTUS2/PTH1R/CIB2/ADCY8/BHLHA15/CD4/MAFA/TREX2/SM…
GO:0022626	cytosolic ribosome	22/2436	22	CC	95/18675	0.00474833	0.0342478	RPL37A/RPL18/RPS2/RPL18A/UBA52/RPS5/RPS16/RPL13/RPL36/RPL8/RPLP2/RPS28/RPS19/RPS15/RPL28/RPL29/RPL35/RPS3/RPL12/RPL3L/HBA2/HBA1
GO:0008037	cell recognition	28/2341	28	BP	129/17910	0.00437753	0.03446	CRTAM/CLEC7A/CD226/PRF1/HAVCR2/DOCK2/DOCK8/TULP1/FCN1/PAEP/CD6/NCR3/CD5/KCNU1/FUT3/CXCR4/CD209/EPHA4/CATSPERB/CCR7/EFNB3/ADGRB1/CNR1/ZP1/CATSPERD/SPACA3/ROBO2/CCL19
GO:1903900	regulation of viral life cycle	31/2341	31	BP	147/17910	0.00444763	0.0349795	RSAD2/CCL8/CCL5/IFIT5/APOBEC3G/SLPI/IFIT1/OAS1/CD28/TRIM21/OASL/IFITM1/APOBEC3D/RESF1/OAS3/TNF/MX1/CD74/LAMP3/FCN1/APOBEC3A/APOBEC3F/APOBEC3H/ISG15/CD4/BST2/LGALS9/FKBP6/IFI27/PTX3/CHMP4C
GO:0043679	axon terminus	23/2436	23	CC	101/18675	0.0049168	0.0351858	RAB3A/CPLX1/LRRK2/NCS1/TULP1/PRKCB/KCNA3/KCNIP3/GPER1/EPHA4/KCNC1/PACSIN1/KCNAB2/CRHBP/PTPRN/GRIN1/ADRA2C/OXT/CNGB1/TH/CHRM1/NOS1/NTSR1
GO:0019725	cellular homeostasis	132/2341	132	BP	814/17910	0.00458228	0.0360054	CXCL10/CXCL11/CXCL9/PTPRC/CCL8/CYBB/FASLG/CCR5/CD38/CYSLTR1/CCL5/CCR2/CXCL13/JAK2/SLC8A1/CLIC2/PIK3CG/LYN/PIK3R2/POLD2/ABCA12/GLRX/CCR1/SLC40A1/LCK/C3AR1/XCL1/CLN6/JPH3/ENDOG/S100A8/LRRK2/SLAMF8/S100A9/MS4A1/NCS1/P2RY6/CCL2/CCL7/PRKCB/MCUB/TMPRSS3/PTPN6/CORO1A/EPO/C1QTNF12/NME8/VSNL1/ITPR1/NCF2/NCF4/CCL3/CD52/RHCG/PTH1R/CIB2/PLCG2/ADCY8/GHRL/CD4/ESR1/BAIAP3/GPER1/RAB39A/TFR2/SLC4A11/FZD9/GNG3/PCK…
GO:0044440	endosomal part	86/2436	86	CC	504/18675	0.00513368	0.0364531	CD274/DTX3L/B2M/TLR8/CTSS/FCGR1B/TLR7/MARCHF1/HLA-B/HLA-DOA/TLR3/JAK2/HLA-DRA/PRF1/SNX20/FCGR1A/HLA-F/HLA-C/CD8B/SLA2/TLR4/RHOV/HLA-DMB/HLA-E/HLA-DPA1/UBA52/SLC9A9/HLA-DRB1/FGD2/IL12B/RAB8B/HLA-DQA2/KIR2DL4/CD1D/HLA-DPB1/HLA-DOB/MRC1/HLA-DQA1/TMEM184A/LRRK2/ACAP1/SLC39A4/TMEM150B/HLA-DQB1/HLA-DMA/TICAM2/CDIP1/HLA-DRB5/HLA-H/LGMN/ANXA8/IRAK2/WNT3A/CYB561A3/NCF4/APOB/ARC/SH3GL3/VPS37D/BAIAP3/SFTPC/…
GO:0021988	olfactory lobe development	10/2341	10	BP	31/17910	0.00466029	0.0365134	LRRK2/CSF1R/DLX2/DLX5/EOMES/EFNA2/FEZF1/ARX/ROBO2/NR2E1
GO:0045742	positive regulation of epidermal growth factor receptor signaling pathway	10/2341	10	BP	31/17910	0.00466029	0.0365134	FASLG/GPER1/PTK6/EREG/NCF1/NEURL1/HAP1/MMP9/AGR2/AGT
GO:1903978	regulation of microglial cell activation	10/2341	10	BP	31/17910	0.00466029	0.0365134	PTPRC/STAP1/TNF/LRRK2/CST7/C1QA/ITGB2/CCL3/ITGAM/TTBK1
GO:0072001	renal system development	54/2341	54	BP	291/17910	0.00466401	0.0365134	STAT1/GCNT1/TACSTD2/LRRK2/RDH10/CRLF1/OVOL1/IRX3/WNT11/MPST/FGF1/PTPRO/MMP17/COL4A3/PKD1L3/WNT6/HOXA11/LGR5/SERPINB7/FOXJ1/NOTCH3/SDC1/SLC34A1/SULF1/COL4A4/FGFR2/EPHA4/SOX11/WNT7B/CD24/REN/PCSK9/CXCR2/GPC3/ASS1/EPCAM/WNT1/HOXD11/IRX2/TCF21/TFAP2B/GATA3/IRX1/WNT4/LIF/PROM1/MMP9/EMX2/OSR1/ROBO2/RBP4/AGT/PAX2/BMP7
GO:0043067	regulation of programmed cell death	235/2341	235	BP	1539/17910	0.004764	0.037262	STAT1/CXCL10/IDO1/CD274/UBD/IFNG/IFIT3/IFIT2/PTPRC/BIRC3/FASLG/CYLD/MNDA/CCR5/LILRB1/CD3G/BCL2L14/CD38/TNFSF10/CCL5/SOD2/TNFAIP8/GZMA/IKZF3/TLR3/JAK2/SP100/GIMAP8/PIK3CG/LYN/NAIP/EVI2B/NUGGC/NLRC4/NSMF/CD28/AIF1/SFN/DOCK8/IL7/NCKAP1L/IL7R/IL2RB/UBA52/PDCD1/BTK/GZMB/CD27/NAT8B/SEMA4D/FGD2/TNFSF14/IL12B/RPS3/GAL/VNN1/HCLS1/STK17B/VAV1/SLC40A1/LCK/FLT3/PLAC8/FFAR4/CD160/CASP10/TP53AIP1/TNF/PRKCQ/DBH…
GO:0031227	intrinsic component of endoplasmic reticulum membrane	28/2436	28	CC	131/18675	0.00532704	0.0375352	B2M/TAP1/HLA-B/HLA-DRA/HLA-F/HLA-C/HLA-E/HLA-DPA1/TAP2/HLA-DRB1/HLA-DQA2/HLA-DPB1/HLA-DQA1/ALG3/TECR/GPAA1/CD74/HLA-DQB1/SLC27A2/SLC27A5/HLA-DRB5/HLA-H/DERL3/HLA-DQB2/HLA-G/CYP2E1/ESYT3/DHRS9
GO:0031957	very long-chain fatty acid-CoA ligase activity	5/2173	5	MF	9/16967	0.00276256	0.037868	SLC27A4/SLC27A2/SLC27A5/SLC27A3/SLC27A6
GO:0032393	MHC class I receptor activity	5/2173	5	MF	9/16967	0.00276256	0.037868	LILRB1/LILRB2/CD160/KLRF1/KIR3DL1
GO:0034987	immunoglobulin receptor binding	5/2173	5	MF	9/16967	0.00276256	0.037868	JCHAIN/CLEC4D/IGHM/IGHA2/IGHA1
GO:0033622	integrin activation	8/2341	8	BP	22/17910	0.0049108	0.0383752	PTGER4/PLEK/CXCL13/P2RY12/MZB1/CXCL12/RASIP1/SKAP1
GO:0035136	forelimb morphogenesis	12/2341	12	BP	41/17910	0.00492689	0.0384658	ZNF358/RDH10/CRABP2/HOXA9/HOXA11/WNT3/TP63/MSX2/TFAP2B/TBX5/WNT7A/OSR1
[truncated: 92 more rows]

## Sheet: Table S5
Table S5. GO analysis of significantly differentially expressed genes in bladder cancer.
ID	Description	GeneRatio	Count	ONT	BgRatio	pvalue	p.adjust	geneID
[truncated: 1,208 more rows]

## Sheet: Table S6
Table S6. GSEA enrichment pathways in melanoma.
[truncated: 39 more rows]

## Sheet: Table S7
Table S7. GSEA enrichment pathways in bladder cancer.
[truncated: 24 more rows]

[truncated: 2 more sheets: Table S8, Table S9]
